# Supplementary material for: Meta-analysis of human and mouse ALS astrocytes reveals multi-omic signatures of inflammatory reactive states
Source: Genome Res. 2022 Jan;32(1):71–84. doi: 10.1101/gr.275939.121 (PMC8744676; doi:10.1101/gr.275939.121)
Supplement: Supplemental Material [file supp_gr.275939.121_Supplemental_Tables.xlsx]

## Sheet: S1. hiPSC lines
iPSC line	ALS mutation	Age of donor	Age at disease onset	Sex of donor		Table S1. Cell lines used in functional assays in this study
CTRL1	None	78	N/A	Male
CTRL2	None	64	N/A	Male
CTRL3	None	51	N/A	Male
CTRL4	None		N/A	Male
CTRL5	None	42	N/A	Male
MUT1	VCP p.R155C	43	40	Female
MUT2
MUT3	VCP p.R191Q	42	36	Male
MUT4

## Sheet: S2. Mass spec
gene_name	UniProt ID	p-value	log2FC		Table S2. Differential protein expression in VCP mutant astrocytes
AAK1	Q2M2I8	0.756631	-0.168		log2FC: log2 Fold Change in VCP mutant fraction vs control fractions astrocytes
AAMDC	Q9H7C9	0.441826	-0.466
AARS	P49588	0.643241	-0.312
AARSD1	Q9BTE6	0.0626347	1.24
ABCF1	Q8NE71	0.651164	-0.332
ABI1	Q8IZP0	0.111725	-1.07
ABI2	Q9NYB9	0.191607	-0.84
ABLIM1	O14639	0.332216	0.562
ABRACL	Q9P1F3	0.0296054	-1.27
ACAA2	P42765	0.576406	-0.391
ACAP1	Q15027	0.416933	-0.399
ACAT1	P24752	0.312772	-0.534
ACAT2	Q9BWD1	0.279035	-0.736
ACO2	Q99798	0.205355	-0.607
ACOT13	Q9NPJ3	0.736676	0.209
ACP2	P11117	0.559964	-0.37
ACTA2	P62736	0.218076	-0.973
ACTB	P60709	0.987871	-0.0113
ACTBL2	Q562R1	0.216519	1.16
ACTC1	P68032	0.410431	-0.718
ACTG1	P63261	0.590468	-0.211
ACTG2	P63267	0.900417	-0.11
ACTN1	P12814	0.20676	-0.535
ACTN4	O43707	0.0314697	-1.72
ACTR1A	P61163	0.585456	0.289
ACTR2	P61160	0.717523	0.253
ACTR3	P61158	0.560325	0.396
ADAMTS16	Q8TE57	0.582402	0.36
ADAR	P55265	0.154519	0.888
ADD1	P35611	0.851648	-0.103
ADD3	Q9UEY8	0.599184	-0.353
ADPRHL1	Q8NDY3	0.796711	-0.133
ADRM1	Q16186	0.807279	0.16
AHCY	P23526	0.717433	-0.272
AHCYL1	O43865	0.602981	0.26
AHNAK	Q09666	0.333446	-1.01
AHNAK2	Q8IVF2	0.780089	0.167
AIMP1	Q12904	0.745168	-0.22
AK1	P00568	0.102938	-0.938
AK2	P54819	0.908377	0.0618
AKAP12	Q02952	0.04762	-1.63
AKAP2	Q9Y2D5	0.303856	0.842
AKR7A2	O43488	0.444203	0.512
AKT1S1	Q96B36	0.248823	0.623
ALB	CON__P02768-1	0.65326	-0.27
ALDH4A1	P30038	0.171684	-0.872
ALDH9A1	P49189	0.0299344	-1.23
ALDOA	P04075	0.387087	-1.04
ALPK2	Q86TB3	0.884339	-0.0793
ALYREF	Q86V81	0.50501	-0.759
ANK2	Q01484	0.287574	-0.763
ANP32A	P39687	0.0465092	-1.16
ANXA1	P04083	0.53842	0.948
ANXA2	P07355	0.853934	-0.315
ANXA3	P12429	0.237184	-0.743
ANXA5	P08758	0.593942	-0.605
ANXA6	P08133	0.48647	0.411
AP3B2	Q13367	0.390538	-0.578
AP3S1	Q92572	0.946792	-0.0489
APEX1	P27695	0.332214	-0.663
APOL2	Q9BQE5	0.344137	0.631
APRT	P07741	0.795652	0.19
AQP8	O94778	0.971754	-0.0224
ARFGAP2	Q8N6H7	0.632044	-0.327
ARFIP1	P53367	0.450991	0.557
ARHGDIA	P52565	0.346872	-1.09
ARL3	P36405	0.0979775	-1.21
ARPC1B	O15143	0.958381	-0.0324
ARPC2	O15144	0.508864	0.446
ARPC3	O15145	0.637516	-0.25
ARPC4	P59998	0.144749	-0.954
ARPC5	O15511	0.0430571	-1.16
ARPC5L	Q9BPX5	0.823198	0.139
ASH2L	Q9UBL3	0.752172	0.197
ASTE1	REV__Q96PB7	0.453255	-0.45
ATG3	Q9NT62	0.621703	-0.312
ATIC	P31939	0.491803	-0.468
ATOX1	O00244	0.773539	-0.21
ATP5A1	P25705	0.87882	0.169
ATP5B	P06576	0.235344	-1.35
ATP5D	P30049	0.123689	-0.918
ATP5H	O75947	0.421321	-0.652
ATP5I	P56385	0.803367	0.196
ATP5J	P18859	0.66098	-0.278
ATP5O	P48047	0.407116	-0.672
ATP6V1A	P38606	0.520607	0.324
ATP6V1B2	P21281	0.870132	0.0863
ATP6V1D	Q9Y5K8	0.486243	-0.376
ATP6V1E1	P36543	0.695402	0.31
ATP6V1F	Q16864	0.407201	0.462
ATP6V1G1	O75348	0.577153	-0.517
ATPIF1	Q9UII2	0.532021	-0.354
ATXN2L	Q8WWM7	0.564078	-0.257
BABAM1	Q9NWV8	0.76775	-0.242
BAG2	O95816	0.348024	-0.431
BAG3	O95817	0.186547	-0.612
BAP18	Q8IXM2	0.375681	-0.631
BASP1	P80723	0.535325	-0.526
BAX	Q07812	0.526977	-0.365
BCAP31	P51572	0.202893	-0.676
BLOC1S1	P78537	0.987989	-0.0107
BLVRB	P30043	0.518393	0.406
BOLA2	Q9H3K6	0.564234	-0.355
BPHL	Q86WA6	0.51171	-0.35
BRK1	Q8WUW1	0.268055	-0.549
BTF3	P20290	0.161982	-1.2
BTF3L4	Q96K17	0.14565	1.17
BZW1	Q7L1Q6	0.810219	0.121
C10orf32	Q96B45	0.092269	1.02
C14orf142	Q9BXV9	0.0881727	-0.933
C1orf198	Q9H425	0.796846	-0.161
C5orf24	Q7Z6I8	0.85571	-0.13
C9orf16	Q9BUW7	0.705382	0.185
CACYBP	Q9HB71	0.979381	-0.0224
CALB2	P22676	0.499505	0.468
CALD1	Q05682	0.923483	-0.0366
CALR	P27797	0.0695668	-2.03
CALU	O43852	0.135508	-1.65
CAMK2D	Q13557	0.070198	-0.958
CAND1	Q86VP6	0.418065	-0.537
CANX	P27824	0.13713	-1.32
CAP1	Q01518	0.883292	0.153
CAPNS1	P04632	0.236059	-0.73
CAPRIN1	Q14444	0.282754	-0.73
CAPS	Q13938	0.492047	0.4
CAPZA1	P52907	0.629437	-0.288
CAPZA2	P47755	0.402188	-0.824
CAPZA3	Q96KX2	0.345936	-0.644
CAPZB	P47756	0.393099	-0.412
CARHSP1	Q9Y2V2	0.506381	0.441
CBX1	P83916	0.526402	0.392
CBX3	Q13185	0.216468	-0.576
CBX5	P45973	0.778875	0.167
CCDC124	Q96CT7	0.236665	-0.9
CCDC137	Q6PK04	0.400197	0.506
CCDC42	Q96M95	0.570174	-0.365
CCDC50	Q8IVM0	0.455153	-0.435
CCDC6	Q16204	0.540263	-0.376
CCT2	P78371	0.926354	-0.0744
CCT3	P49368	0.212477	-0.789
CCT4	P50991	0.599523	-0.364
CCT5	P48643	0.166172	-0.973
CCT6A	P40227	0.470594	-0.561
CCT8	P50990	0.0302853	-1.21
CD2AP	Q9Y5K6	0.0502464	-1.04
CD44	P16070	0.0533499	-1.14
CD99	P14209	0.626291	-0.379
CD99L2	Q8TCZ2	0.738775	0.207
CDC37	Q16543	0.22552	-0.698
CDC42BPB	Q9Y5S2	0.271278	-0.633
CDC42EP1	Q00587	0.694431	0.28
CDH2	P19022	0.96857	-0.0255
CDKN2A	P42771	0.603991	-0.3
CDKN2AIPNL	Q96HQ2	0.381895	0.565
CDV3	Q9UKY7	0.389382	-0.814
CENPV	Q7Z7K6	0.606761	0.352
CEP89	Q96ST8	0.510888	0.566
CETN2	P41208	0.735541	0.229
CFL1	P23528	0.937348	-0.0693
CFL2	Q9Y281	0.594073	-0.41
CHCHD3	Q9NX63	0.103769	1.09
CHD4	Q14839	0.765158	0.245
CHMP1A	Q9HD42	0.664748	0.302
CHMP1B	Q7LBR1	0.771921	0.16
CHMP2A	O43633	0.263139	-0.587
CHMP2B	Q9UQN3	0.271531	0.514
CHMP3	Q9Y3E7	0.472066	0.372
CHMP4A	Q9BY43	0.481697	-0.401
CHMP4B	Q9H444	0.285973	-0.801
CHMP5	Q9NZZ3	0.958389	0.0397
CHTOP	Q9Y3Y2	0.733776	-0.297
CIRBP	Q14011	0.857758	-0.148
CKAP4	Q07065	0.84423	-0.211
CKB	P12277	0.824385	-0.314
CLIC1	O00299	0.948528	0.0369
CLIC4	Q9Y696	0.502814	-0.441
CLIP1	P30622	0.299011	-0.712
CLTA	P09496	0.862172	-0.0845
CLTB	P09497	0.506636	0.458
CLTC	Q00610	0.480296	-0.431
CMC1	Q7Z7K0	0.939454	-0.0442
CMPK1	P30085	0.035871	-1.43
CNBP	P62633	0.924123	0.0588
CNDP2	Q96KP4	0.0639724	-1.01
CNN1	P51911	0.566499	0.463
CNN2	Q99439	0.578476	-0.702
CNN3	Q15417	0.910045	-0.147
CNP	P09543	0.928585	0.0543
CNPY2	Q9Y2B0	0.0771307	-1.08
CNPY4	Q8N129	0.611823	-0.272
COA3	Q9Y2R0	0.381618	-0.59
COA4	Q9NYJ1	0.64135	-0.229
COL11A1	P12107	0.48119	0.42
COL1A1	P02452	0.487375	-0.37
COL5A1	P20908	0.442963	-0.424
COL5A2	P05997	0.741031	0.201
CON__P00761	CON__P00761	0.950155	0.048
CON__P02769	CON__P02769	0.780292	-0.158
CON__P15636	CON__P15636	0.116629	-1.09
CON__Q3SX28	CON__Q3SX28	0.852524	-0.0885
COPB1	P53618	0.835142	-0.155
COPS3	Q9UNS2	0.311433	-0.565
CORO1B	Q9BR76	0.576174	-0.456
CORO1C	Q9ULV4	0.738809	-0.282
COTL1	Q14019	0.0653502	-1.81
COX5A	P20674	0.504644	-0.651
COX5B	P10606	0.515318	-0.433
COX6A1	P12074	0.912887	-0.0748
COX6B1	P14854	0.957551	0.0354
CPPED1	Q9BRF8	0.649477	-0.181
CRABP1	P29762	0.394864	-0.522
CRIP2	P52943	0.869757	-0.251
CRK	P46108	0.195089	-0.957
CRMP1	Q14194	0.267856	-1.01
CROCC	Q5TZA2	0.279225	-0.719
CRYAB	P02511	0.914709	-0.134
CSDE1	O75534	0.670611	0.26
CSE1L	P55060	0.83891	0.142
CSRP1	P21291	0.911958	-0.155
CSRP2	Q16527	0.39156	-0.397
CSTB	P04080	0.922991	0.0746
CSTF1	Q05048	0.834798	-0.123
CSTF2	P33240	0.190521	-0.805
CTNNA1	P35221	0.840005	-0.211
CTNNB1	P35222	0.0725089	-1.56
CTNND1	O60716	0.657681	0.424
CTNND2	Q9UQB3	0.57579	0.354
CTSD	P07339	0.175869	-0.735
CTSL	P07711	0.808512	-0.158
CTTN	Q14247	0.845882	0.0948
CYHR1	Q6ZMK1	0.620375	-0.25
DAP	P51397	0.832216	-0.119
DAZAP1	Q96EP5	0.263786	-0.752
DBI	P07108	0.89271	0.0915
DBN1	Q16643	0.674364	-0.266
DBNL	Q9UJU6	0.0979165	-1.12
DCD	P81605	0.784692	0.162
DCLK1	O15075	0.407796	-0.496
DCTN2	Q13561	0.371751	-0.745
DCTN5	Q9BTE1	0.810275	-0.168
DCX	O43602	0.224242	-0.688
DDAH1	O94760	0.71538	0.289
DDAH2	O95865	0.864748	-0.0955
DDX17	Q92841	0.965421	0.0229
DDX18	Q9NVP1	0.527426	-0.419
DDX19A	Q9NUU7	0.817606	0.164
DDX19B	Q9UMR2	0.917294	0.069
DDX21	Q9NR30	0.699204	-0.266
DDX39B	Q13838	0.837181	0.155
DDX3X	O00571	0.885474	0.0869
DDX51	Q8N8A6	0.237134	-0.787
DENR	O43583	0.0781234	-0.882
DES	P17661	0.657848	-0.389
DHX9	Q08211	0.908673	0.0989
DKK3	Q9UBP4	0.141532	0.744
DLGAP4	Q9Y2H0	0.350742	0.508
DLST	P36957	0.152747	-0.935
DNAH7	Q8WXX0	0.442702	-0.447
DNAJB1	P25685	0.557129	-0.312
DNAJB11	Q9UBS4	0.605848	-0.334
DNAJC8	O75937	0.213557	-0.705
DNASE2	O00115	0.533126	-0.293
DPY30	Q9C005	0.95245	-0.0337
DPYSL2	Q16555	0.408556	-1.03
DPYSL3	Q14195	0.726555	-0.506
DPYSL4	O14531	0.952841	0.0357
DPYSL5	Q9BPU6	0.282452	-0.587
DSTN	P60981	0.648733	-0.468
DTD1	Q8TEA8	0.291315	-0.642
DTNA	Q9Y4J8	0.660792	0.321
DTYMK	P23919	0.279688	0.763
DYNC1H1	Q14204	0.0172532	-2.06
DYNC1I2	Q13409	0.741221	0.292
DYNC1LI2	O43237	0.351781	-0.631
DYNLRB1	Q9NP97	0.866086	-0.145
ECH1	Q13011	0.0955919	1
ECHS1	P30084	0.39921	0.465
EDF1	O60869	0.31507	-0.701
EEA1	Q15075	0.31113	-0.55
EEF1A1	P68104	0.44964	1.1
EEF1A2	Q05639	0.155579	-0.787
EEF1B2	P24534	0.0778038	-1.14
EEF1D	P29692	0.585304	-0.766
EEF1E1	O43324	0.101599	-0.764
EEF1G	P26641	0.975508	-0.0176
EEF2	P13639	0.691801	-0.357
EEFSEC	P57772	0.9378	0.0479
EFHD1	Q9BUP0	0.333572	0.533
EFHD2	Q96C19	0.826796	-0.139
EHD1	Q9H4M9	0.551207	-0.369
EI24	O14681	0.496463	0.405
EIF1	P41567	0.745388	0.35
EIF1AX	P47813	0.630462	-0.229
EIF1B	O60739	0.312821	-0.704
EIF2A	Q9BY44	0.831572	0.131
EIF2AK2	P19525	0.728783	0.217
EIF2S1	P05198	0.332331	-0.492
EIF3A	Q14152	0.117214	-0.972
EIF3B	P55884	0.12008	-0.79
EIF3G	O75821	0.286713	-0.714
EIF4A1	P60842	0.239787	-0.963
EIF4A3	P38919	0.767345	0.176
EIF4B	P23588	0.916442	-0.0625
EIF4EBP1	Q13541	0.336368	0.667
EIF4G1	Q04637	0.308995	-0.72
EIF4G2	P78344	0.385609	0.802
EIF4H	Q15056	0.0892035	-1.66
EIF5	P55010	0.0399904	1.26
EIF5A	P63241	0.286023	-0.907
ELAVL1	Q15717	0.495805	-0.503
EMD	P50402	0.251858	-0.634
EML1	O00423	0.443788	-0.496
ENAH	Q8N8S7	0.122081	-1.35
ENO1	P06733	0.861043	0.268
ENO2	P09104	0.0403357	-1.34
ENSA	O43768	0.612963	-0.328
ENY2	Q9NPA8	0.889495	-0.0761
EPB41L1	Q9H4G0	0.810016	0.138
EPB41L2	O43491	0.0960757	-1.04
EPB41L3	Q9Y2J2	0.459071	-0.471
EPDR1	Q9UM22	0.163232	-0.843
EPRS	P07814	0.651454	-0.258
EPS15L1	Q9UBC2	0.31478	-0.608
ERCC6L2	Q5T890	0.373685	-0.657
ERH	P84090	0.330279	-0.832
ERP29	P30040	0.282813	-1.07
ESYT1	Q9BSJ8	0.24638	0.674
ETF1	P62495	0.477132	-0.553
ETFB	P38117	0.897602	-0.0758
EWSR1	Q01844	0.519198	-0.365
EXOSC3	Q9NQT5	0.12527	-1.08
EZR	P15311	0.160788	-1.77
FABP5	Q01469	0.793398	0.408
FABP7	O15540	0.638534	-0.534
FAF2	Q96CS3	0.238061	-0.77
FAHD2A	Q96GK7	0.754002	0.225
FAM114A1	Q8IWE2	0.513203	-0.375
FAM129B	Q96TA1	0.0723153	-1.1
FAM136A	Q96C01	0.587262	0.308
FAM195B	C9JLW8	0.136956	-0.864
FAM21A	Q641Q2	0.980565	-0.0156
FAM90A24P	P0C7X0	0.205052	0.736
FARSA	Q9Y285	0.169037	-1.01
FASN	P49327	0.329156	-0.766
FAU	P62861	0.15759	-0.712
FBL	P22087	0.835959	0.147
FBLIM1	Q8WUP2	0.125956	-1.04
FH	P07954	0.257646	-0.603
FHL1	Q13642	0.220904	-1.08
FHL2	Q14192	0.30936	-0.68
FHL3	Q13643	0.801021	0.146
FILIP1L	Q4L180	0.946605	-0.0456
FIS1	Q9Y3D6	0.914688	0.0723
FKBP10	Q96AY3	0.778614	-0.142
FKBP1A	P62942	0.865477	0.14
FKBP3	Q00688	0.295285	-0.854
FKBP4	Q02790	0.537811	-0.398
FLII	Q13045	0.23225	-0.719
FLNA	P21333	0.416619	-1.07
FLNB	O75369	0.373386	-0.822
FLNC	Q14315	0.289174	-1.38
FLOT1	O75955	0.467507	-0.542
FNBP1L	Q5T0N5	0.219251	0.798
FRAS1	Q86XX4	0.904532	0.0701
FUBP1	Q96AE4	0.10895	-1.27
FUBP3	Q96I24	0.225347	-0.8
FUS	P35637	0.490717	-0.483
G3BP1	Q13283	0.979397	-0.0114
G6PD	P11413	0.635073	0.352
GAA	P10253	0.550018	0.365
GALNT2	Q10471	0.718136	-0.198
GANAB	Q14697	0.154889	-1.02
GANC	Q8TET4	0.749962	-0.279
GAP43	P17677	0.194661	-0.702
GAPDH	P04406	0.41306	-0.849
GBP1	P32455	0.713188	0.263
GCSH	P23434	0.183417	-1.07
GDI1	P31150	0.528875	-0.401
GDI2	P50395	0.108434	-1.03
GFAP	P14136	0.316061	-1.45
GGH	Q92820	0.418478	-0.541
GLIPR2	Q9H4G4	0.737086	0.13
GLO1	Q04760	0.291438	-0.531
GLRX	P35754	0.657457	-0.364
GLRX3	O76003	0.341558	-0.466
GLUD1	P00367	0.881015	0.087
GMFB	P60983	0.662173	-0.268
GNB1	P62873	0.00959668	-1.89
GNG12	Q9UBI6	0.574165	0.302
GNG2	P59768	0.840615	0.112
GNS	P15586	0.155209	-1.12
GOLGA5	Q8TBA6	0.726513	0.216
GPI	P06744	0.468748	-0.4
GPS1	Q13098	0.177044	0.818
GPX1	P07203	0.680816	-0.226
GREM2	Q9H772	0.634877	-0.316
GRIN2A	Q12879	0.763367	0.218
GRSF1	Q12849	0.860931	0.113
GSN	P06396	0.148066	-1.23
GSS	P48637	0.729089	0.243
GSTO1	P78417	0.600481	0.229
GSTP1	P09211	0.749039	0.249
GTF2A1	P52655	0.353138	0.559
GTF2F2	P13984	0.419007	0.468
GTPBP4	Q9BZE4	0.624776	-0.377
H1F0	P07305	0.579942	0.445
H1FX	Q92522	0.50559	0.497
H2AFV	Q71UI9	0.922592	0.124
H2AFY	O75367	0.84057	0.148
H3F3A	P84243	0.930339	0.135
HADHA	P40939	0.201001	0.823
HADHB	P55084	0.88148	-0.0783
HAGH	Q16775	0.108523	0.997
HARS	P12081	0.845617	0.108
HDGF	P51858	0.465493	-0.488
HDGFRP2	Q7Z4V5	0.684657	0.202
HDLBP	Q00341	0.388428	-0.682
HEXB	P07686	0.697176	-0.206
HIGD1A	Q9Y241	0.309825	0.73
HINT1	P49773	0.472713	-0.706
HINT2	Q9BX68	0.259268	-0.651
HIST1H1B	P16401	0.535341	-0.447
HIST1H1C	P16403	0.750815	-0.261
HIST1H1E	P10412	0.278461	-1.03
HIST1H2AC	Q93077	0.641044	0.666
HIST1H2AD	P20671	0.74999	0.194
HIST1H2AJ	Q99878	0.553469	0.522
HIST1H2BK	O60814	0.864515	0.285
HIST1H2BL	Q99880	0.761083	0.229
HIST1H2BM	Q99879	0.991936	0.0141
HIST1H3A	P68431	0.918989	0.0995
HIST1H4A	P62805	0.759312	0.538
HIST2H2AA3	Q6FI13	0.907119	0.244
HIST2H2AB	Q8IUE6	0.595584	-0.394
HIST2H2BE	Q16778	0.882098	0.158
HIST2H3A	Q71DI3	0.9017	-0.287
HIST3H2BB	Q8N257	0.395434	0.596
HK1	P19367	0.159885	-0.932
HLA-A	P04439	0.335519	-0.573
HLA-E	P13747	0.2891	-0.616
HMGA2	P52926	0.324997	0.689
HMGB1	P09429	0.0106317	-2.05
HMGB3	O15347	0.895811	-0.0791
HMOX2	P30519	0.299788	-0.628
HN1	Q9UK76	0.775457	0.288
HN1L	Q9H910	0.60549	-0.467
HNRNPA0	Q13151	0.700676	0.358
HNRNPA1	P09651	0.940341	0.0347
HNRNPA2B1	P22626	0.503419	-0.309
HNRNPA3	P51991	0.985297	-0.0139
HNRNPAB	Q99729	0.137668	-0.823
HNRNPC	P07910	0.896963	-0.18
HNRNPD	Q14103	0.585462	-0.364
HNRNPDL	O14979	0.501132	0.604
HNRNPF	P52597	0.753936	-0.21
HNRNPH1	P31943	0.599518	0.251
HNRNPH3	P31942	0.334307	0.674
HNRNPK	P61978	0.224633	-0.653
HNRNPL	P14866	0.901122	-0.1
HNRNPM	P52272	0.971215	-0.0184
HNRNPR	O43390	0.601966	0.339
HNRNPU	Q00839	0.193046	1.64
HOOK3	Q86VS8	0.0674051	1.07
HP1BP3	Q5SSJ5	0.861617	0.203
HSBP1	O75506	0.350272	-0.773
HSD17B10	Q99714	0.811238	-0.156
HSP90AA1	P07900	0.117945	-0.899
HSP90AB1	P08238	0.131899	-1.21
HSP90B1	P14625	0.167416	-1.43
HSPA12A	O43301	0.49663	-0.34
HSPA1B	P0DMV9	0.122194	-1.24
HSPA1L	P34931	0.835813	0.139
HSPA4	P34932	0.276187	-0.588
HSPA5	P11021	0.848613	-0.264
HSPA6	P17066	0.126293	-0.915
HSPA8	P11142	0.289267	-1.18
HSPA9	P38646	0.189958	-1.05
HSPB1	P04792	0.663656	0.584
HSPD1	P10809	0.878707	-0.196
HSPE1	P61604	0.832451	0.243
HSPH1	Q92598	0.552456	-0.313
HYOU1	Q9Y4L1	0.150402	-1.32
HYPK	Q9NX55	0.326281	-0.667
IDH1	O75874	0.404648	-0.511
IFNW1	P05000	0.455772	0.555
IGF2BP1	Q9NZI8	0.393916	0.552
IGFBP5	P24593	0.759079	-0.183
IGFBP7	Q16270	0.160213	-0.899
IL1RL1	Q01638	0.742001	0.202
ILF3	Q12906	0.355493	-0.64
IMMT	Q16891	0.161788	-0.972
INA	Q16352	0.861792	0.138
IPO5	O00410	0.48499	-0.348
IQGAP1	P46940	0.829199	-0.144
ITGA3	P26006	0.160956	0.792
ITGA7	Q13683	0.341198	-0.628
ITGAV	P06756	0.367554	-0.662
ITGB1	P05556	0.524609	-0.434
ITSN1	Q15811	0.882705	-0.0707
KARS	Q15046	0.697246	-0.173
KHDRBS1	Q07666	0.71604	0.19
KHSRP	Q92945	0.143408	-1.25
KIAA1210	Q9ULL0	0.252381	0.669
KIAA1598	A0MZ66	0.597567	0.341
KIF5B	P33176	0.0402146	-1.4
KIR2DS5	Q14953	0.854061	0.113
KLC2	Q9H0B6	0.527294	0.421
KPNA2	P52292	0.547435	0.409
KPNA3	O00505	0.281209	0.598
KPNA4	O00629	0.799951	0.162
KPNA6	O60684	0.920643	0.0617
KPNB1	Q14974	0.112584	-1.45
KRBA1	A5PL33	0.423581	-0.415
KRT1	CON__P04264	0.958823	-0.0314
KRT18	P05783	0.704157	-0.263
KRT7	CON__Q3KNV1	0.956143	0.0426
KRT9	P35527	0.489026	0.442
KTN1	Q86UP2	0.15183	-1.04
LAMB1	P07942	0.116353	-0.935
LAMTOR1	Q6IAA8	0.177975	-0.612
LAP3	P28838	0.130613	-0.985
LARP1	Q6PKG0	0.896458	-0.0915
LASP1	Q14847	0.367829	-0.837
LDHA	P00338	0.966181	-0.0266
LDHB	P07195	0.882257	0.15
LEMD2	Q8NC56	0.658314	0.305
LGALS1	P09382	0.486677	0.402
LGALS3	P17931	0.498804	-0.418
LIMA1	Q9UHB6	0.924863	-0.136
LIMCH1	Q9UPQ0	0.777298	-0.162
LIMD2	Q9BT23	0.446526	-0.476
LIN7C	Q9NUP9	0.36434	0.524
LMCD1	Q9NZU5	0.318097	-0.554
LMNA	P02545	0.64474	-0.717
LMNB1	P20700	0.871315	0.242
LMNB2	Q03252	0.89487	0.109
LNP	Q9C0E8	0.63099	0.305
LPP	Q93052	0.513736	0.326
LRP1	Q07954	0.483811	-0.488
LRRC47	Q8N1G4	0.864994	-0.0951
LRRC59	Q96AG4	0.258705	0.809
LRRFIP1	Q32MZ4	0.354362	-0.576
LSM1	O15116	0.0793934	-1.05
LSM12	Q3MHD2	0.524304	-0.369
LSM3	P62310	0.132651	-1.06
LSM5	Q9Y4Y9	0.726536	0.251
LSM8	O95777	0.339413	-0.669
LUC7L2	Q9Y383	0.399978	0.483
LUZP1	Q86V48	0.613439	-0.281
LZTFL1	Q9NQ48	0.762032	0.231
MACF1	Q9UPN3	0.801841	-0.214
MAGED2	Q9UNF1	0.362006	-0.543
MAN2B1	O00754	0.668192	-0.24
MAP1A	P78559	0.0318481	-1.49
MAP1B	P46821	0.421335	-0.845
MAP2	P11137	0.900966	-0.0853
MAP4	P27816	0.597007	-0.684
MAP4K4	O95819	0.0548136	1.12
MAP7D1	Q3KQU3	0.963889	-0.0293
MAPK1	P28482	0.774791	-0.156
MAPK1IP1L	Q8NDC0	0.740929	-0.255
MAPRE1	Q15691	0.0740482	-1.28
MARCKS	P29966	0.446519	-0.512
MARCKSL1	P49006	0.458191	0.564
MATR3	P43243	0.351277	-0.552
MBNL2	Q5VZF2	0.317693	-0.463
MCAM	P43121	0.587675	-0.328
MCM4	P33991	0.309317	1.39
MDH1	P40925	0.549717	-0.476
MDH2	P40926	0.0237153	-1.73
ME1	P48163	0.645069	-0.259
MEA1	Q16626	0.373519	0.62
MIA3	Q5JRA6	0.545202	-0.285
MICALL1	Q8N3F8	0.939123	-0.0497
MIF	P14174	0.904399	-0.127
MLLT4	P55196	0.577093	0.345
MRC2	Q9UBG0	0.0891546	-1.03
MRPL11	Q9Y3B7	0.764836	0.173
MRPL12	P52815	0.0321819	-1.49
MRPS36	P82909	0.542809	-0.441
MSI1	O43347	0.611772	0.308
MSN	P26038	0.692535	-0.437
MT1E	P04732	0.557847	-0.317
MT1F	P04733	0.683606	-0.228
MT1X	P80297	0.963552	-0.0276
MT2A	P02795	0.367869	-0.618
MTDH	Q86UE4	0.960805	0.0312
MTHFD1	P11586	0.515068	0.546
MTPN	P58546	0.410223	-0.637
MVP	Q14764	0.225391	-0.903
MXRA7	P84157	0.316893	-0.526
MYDGF	Q969H8	0.142578	-1.21
MYEOV2	Q8WXC6	0.183663	-0.844
MYH10	P35580	0.486194	-0.433
MYH11	P35749	0.772161	-0.237
MYH9	P35579	0.706891	-0.424
MYL1	P05976	0.0686438	-1.17
MYL12A	P19105	0.383563	-0.759
MYL6	P60660	0.754366	0.403
MYL9	P24844	0.484241	-0.651
MYLK	Q15746	0.00430815	-1.68
NAA10	P41227	0.811407	-0.134
NAA35	Q5VZE5	0.820319	-0.123
NACA	Q13765	0.904329	-0.147
NACAD	O15069	0.719094	0.233
NAP1L1	P55209	0.372001	-0.851
NAP1L4	Q99733	0.971317	-0.038
NAPG	Q99747	0.492362	-0.317
NASP	P49321	0.751285	-0.184
NAT8B	Q9UHF3	0.780378	0.229
NCL	P19338	0.53292	-0.341
NDUFA2	O43678	0.27836	-0.693
NDUFB1	O75438	0.830254	-0.137
NDUFS4	O43181	0.0421612	-1.12
NDUFS6	O75380	0.773045	0.201
NDUFS7	O75251	0.804386	0.195
NDUFS8	O00217	0.318539	0.553
NEDD1	Q8NHV4	0.132444	0.991
NEDD8	Q15843	0.470607	-0.74
NEFL	P07196	0.902655	0.205
NEFM	P07197	0.692802	-0.398
NELFA	Q9H3P2	0.879722	-0.106
NENF	Q9UMX5	0.606744	0.306
NES	P48681	0.9536	-0.106
NEXN	Q0ZGT2	0.728557	-0.34
NIPSNAP1	Q9BPW8	0.748443	0.187
NME2	P22392	0.997705	-0.00295
NOLC1	Q14978	0.190326	1.12
NONO	Q15233	0.442075	-0.632
NOP10	Q9NPE3	0.784252	-0.178
NPM1	P06748	0.680883	-0.168
NPM3	O75607	0.702512	0.206
NQO1	P15559	0.811826	-0.122
NSDHL	Q15738	0.0881083	-1.06
NSFL1C	Q9UNZ2	0.0640867	-1.26
NUCB1	Q02818	0.00934268	-1.55
NUCKS1	Q9H1E3	0.923665	-0.0588
NUDC	Q9Y266	0.14183	-0.99
NUDCD2	Q8WVJ2	0.665695	-0.322
NUDT21	O43809	0.318215	-0.572
NUDT5	Q9UKK9	0.303754	-0.547
NUMA1	Q14980	0.973562	-0.0326
NUP188	Q5SRE5	0.10716	0.855
NUP93	Q8N1F7	0.338705	0.588
OPTN	Q96CV9	0.490377	0.381
OR2L13	Q8N349	0.240447	0.764
P0DP25	P0DP25	0.646755	-0.682
P4HA1	P13674	0.109818	-0.848
P4HB	P07237	0.89691	-0.153
PA2G4	Q9UQ80	0.646242	-0.225
PABPC1	P11940	0.468225	-0.487
PABPN1	Q86U42	0.385741	0.551
PADI6	Q6TGC4	0.233202	-0.786
PAFAH1B3	Q15102	0.331683	-0.438
PAICS	P22234	0.976618	-0.0227
PAK2	Q13177	0.312	0.687
PALLD	Q8WX93	0.774033	0.35
PALM	O75781	0.197811	-0.888
PARK7	Q99497	0.516372	-0.618
PARP1	P09874	0.838626	-0.104
PAWR	Q96IZ0	0.270365	-0.783
PBXIP1	Q96AQ6	0.391283	0.643
PCBP1	Q15365	0.0373909	-0.955
PCBP2	Q15366	0.398167	-0.581
PCMT1	P22061	0.612797	-0.326
PCYT1A	P49585	0.103744	0.996
PDAP1	Q13442	0.126131	-0.903
PDCD5	O14737	0.269903	-0.755
PDCD6IP	Q8WUM4	0.826603	-0.174
PDHA1	P08559	0.973942	-0.0217
PDHB	P11177	0.868901	0.0891
PDIA3	P30101	0.674434	-0.587
PDIA4	P13667	0.40505	-0.804
PDIA6	Q15084	0.262691	-0.913
PDLIM1	O00151	0.675947	-0.55
PDLIM2	Q96JY6	0.827852	-0.137
PDLIM3	Q53GG5	0.958606	-0.0268
PDLIM4	P50479	0.756965	-0.334
PDLIM5	Q96HC4	0.733685	-0.293
PDLIM7	Q9NR12	0.443963	-0.75
PEA15	Q15121	0.881704	-0.139
PEBP1	P30086	0.855238	-0.228
PFDN1	O60925	0.881665	-0.119
PFDN2	Q9UHV9	0.811261	-0.139
PFDN4	Q9NQP4	0.199047	-0.705
PFDN5	Q99471	0.490031	-0.39
PFDN6	O15212	0.143741	-0.966
PFKL	P17858	0.404478	0.563
PFKP	Q01813	0.23333	-0.686
PFN1	P07737	0.09241	-1.61
PFN2	P35080	0.615597	-0.334
PGAM1	P18669	0.425631	-0.938
PGD	P52209	0.228453	-0.821
PGK1	P00558	0.369201	-0.887
PGLS	O95336	0.199782	-0.694
PGM3	O95394	0.00957659	-1.9
PHB	P35232	0.923507	0.086
PHB2	Q99623	0.132435	-0.857
PHF5A	Q7RTV0	0.860831	-0.113
PHGDH	O43175	0.562528	0.331
PHLDB1	Q86UU1	0.438613	-0.368
PHPT1	Q9NRX4	0.751589	0.356
PICALM	Q13492	0.351046	-0.619
PIN1	Q13526	0.356446	-0.588
PIN4	Q9Y237	0.671474	-0.285
PKIG	Q9Y2B9	0.248894	0.671
PKM	P14618	0.677368	-0.518
PKN2	Q16513	0.392561	0.536
PLBD2	Q8NHP8	0.471378	-0.368
PLCL2	Q9UPR0	0.827187	-0.134
PLD1	Q13393	0.139433	-0.844
PLEC	Q15149	0.0679823	-2.01
PLIN3	O60664	0.119789	-1.4
PLP2	Q04941	0.457692	-0.384
PNN	Q9H307	0.827893	0.141
PODXL	O00592	0.278231	0.684
POLDIP3	Q9BY77	0.996667	0.00332
POLR2M	Q6EEV4	0.0691615	1.16
POTEKP	Q9BYX7	0.159331	0.793
PPA1	Q15181	0.499062	-0.629
PPFIA1	Q13136	0.379581	-0.486
PPIA	P62937	0.619818	0.707
PPIB	P23284	0.536775	-0.686
PPM1G	O15355	0.833134	0.132
PPP1CB	P62140	0.871343	-0.113
PPP1R11	O60927	0.674621	-0.258
PPP1R12A	O14974	0.706375	-0.208
PPP1R12C	Q9BZL4	0.119462	-0.992
PPP1R14B	Q96C90	0.416897	-0.64
PPP1R18	Q6NYC8	0.155164	-0.713
PPP1R2P3	Q6NXS1	0.623807	0.252
PPP2R5E	Q16537	0.646997	-0.245
PRAF2	O60831	0.123008	-0.881
PRDM2	Q13029	0.190131	-0.93
PRDX1	Q06830	0.874683	-0.22
PRDX2	P32119	0.112533	-1.36
PRDX5	P30044	0.859204	-0.209
PRDX6	P30041	0.887887	-0.157
PRICKLE1	Q96MT3	0.739953	0.203
PRKAR2A	P13861	0.149134	-1.08
PRKCA	P17252	0.466236	-0.51
PRKCB	P05771	0.806344	-0.167
PRKCSH	P14314	0.016774	-2.31
PRKDC	P78527	0.36144	-0.559
PRPF19	Q9UMS4	0.577194	-0.589
PRPF31	Q8WWY3	0.596513	0.336
PRPH	P41219	0.410704	-0.555
PSAT1	Q9Y617	0.660292	0.222
PSIP1	O75475	0.654505	0.294
PSMA1	P25786	0.499165	-0.703
PSMA2	P25787	0.186395	0.826
PSMA3	P25788	0.806091	0.171
PSMA5	P28066	0.244509	-0.692
PSMA6	P60900	0.142796	-0.892
PSMA7	O14818	0.0160402	-1.74
PSMB4	P28070	0.904003	0.0775
PSMB6	P28072	0.0723796	-1.19
PSMB7	Q99436	0.745158	-0.23
PSMC3	P17980	0.977325	-0.0179
PSMC4	P43686	0.264088	-0.557
PSMC5	P62195	0.237055	-0.725
PSMD11	O00231	0.671812	-0.282
PSMD4	P55036	0.167282	-0.847
PSMD6	Q15008	0.597521	0.341
PSMD9	O00233	0.75544	-0.153
PSME1	Q06323	0.937626	-0.052
PSMG1	O95456	0.697358	0.277
PTBP1	P26599	0.0478274	-1.07
PTBP2	Q9UKA9	0.880044	0.0877
PTK7	Q13308	0.822592	0.136
PTMA	P06454	0.725152	0.32
PTMS	P20962	0.548772	-0.5
PTPN11	Q06124	0.592228	-0.415
PTRF	Q6NZI2	0.318656	-0.45
PURA	Q00577	0.347381	0.491
PXN	P49023	0.554997	0.38
QKI	Q96PU8	0.0352549	-1.28
QTRT1	Q9BXR0	0.953442	-0.037
RAB11FIP2	Q7L804	0.934301	0.0638
RAB1A	P62820	0.095321	-1.19
RAB34	P0DI83	0.546863	-0.423
RABEP1	Q15276	0.805282	-0.175
RABIF	P47224	0.78335	-0.15
RAD23A	P54725	0.491619	-0.446
RAD23B	P54727	0.0467111	-1.04
RAET1G	Q6H3X3	0.704111	-0.286
RAI14	Q9P0K7	0.85743	0.138
RALY	Q9UKM9	0.626088	0.617
RAN	P62826	0.442434	-0.637
RANBP1	P43487	0.120479	-1.06
RANBP3	Q9H6Z4	0.746082	-0.193
RANGAP1	P46060	0.0898638	-0.889
RAP1A	P62834	0.844186	-0.107
RBBP7	Q16576	0.960105	-0.0255
RBM14	Q96PK6	0.360437	0.859
RBM3	P98179	0.369494	-0.772
RBM4	Q9BWF3	0.780104	0.169
RBM8A	Q9Y5S9	0.330662	-0.567
RBMX	P38159	0.664538	0.451
RBP1	P09455	0.8415	-0.16
RBX1	P62877	0.741212	-0.218
RCN1	Q15293	0.0790995	-1.4
RCN2	Q14257	0.444912	-0.505
RDX	P35241	0.0106025	-2.27
REEP2	Q9BRK0	0.203038	-0.967
RELA	Q04206	0.209354	0.826
REPS1	Q96D71	0.639763	0.288
REV__A6NK06	REV__A6NK06	0.518268	-0.424
REV__A7E2Y1	REV__A7E2Y1	0.850954	0.107
REV__O94876	REV__O94876	0.529827	0.428
REV__P24928	REV__P24928	0.223871	0.97
REV__P35556	REV__P35556	0.550944	0.432
REV__Q13976	REV__Q13976	0.411238	0.556
REV__Q6K0P9	REV__Q6K0P9	0.191704	0.736
REV__Q8NF91	REV__Q8NF91	0.549387	0.404
REV__Q8TAK5	REV__Q8TAK5	0.888639	0.0985
REV__Q8WZ42	REV__Q8WZ42	0.78466	0.184
REV__Q9H9T3	REV__Q9H9T3	0.284219	0.755
REV__Q9UIJ7	REV__Q9UIJ7	0.729825	0.245
RFTN1	Q14699	0.0153787	2.69
RIC1	Q4ADV7	0.402275	0.623
RILPL1	Q5EBL4	0.140995	-0.882
RNASET2	O00584	0.150615	-1.02
RNH1	P13489	0.776472	-0.165
RNPS1	Q15287	0.73891	0.295
RPL10	P27635	0.834499	-0.146
RPL10A	P62906	0.766879	-0.209
RPL11	P62913	0.270244	0.598
RPL12	P30050	0.544012	-0.433
RPL13	P26373	0.353226	0.404
RPL13AP3	Q6NVV1	0.729887	-0.169
RPL14	P50914	0.598284	-0.31
RPL15	P61313	0.970254	-0.0224
RPL17	P18621	0.849046	-0.115
RPL18A	Q02543	0.889902	-0.0514
RPL19	P84098	0.610702	-0.264
RPL21	P46778	0.90572	-0.0748
RPL22	P35268	0.138279	-1.26
RPL23	P62829	0.00834057	-2.17
RPL23A	P62750	0.254966	0.812
RPL24	P83731	0.306467	-0.675
RPL26L1	Q9UNX3	0.946194	-0.0432
RPL28	P46779	0.0959861	0.734
RPL29	P47914	0.215616	-0.556
RPL3	P39023	0.0804948	-0.92
RPL30	P62888	0.0470763	-1.17
RPL31	P62899	0.455133	0.409
RPL34	P49207	0.166051	0.758
RPL35	P42766	0.143755	0.73
RPL35A	P18077	0.233677	0.494
RPL36AL	Q969Q0	0.501936	-0.452
RPL37A	P61513	0.811007	-0.17
RPL38	P63173	0.302724	-0.637
RPL39P5	Q59GN2	0.965088	0.0269
RPL4	P36578	0.424332	-0.582
RPL5	P46777	0.131473	-1.02
RPL6	Q02878	0.527078	0.531
RPL7	P18124	0.71059	-0.197
RPL7A	P62424	0.899301	-0.0815
RPL8	P62917	0.0646603	-0.865
RPL9	P32969	0.548382	-0.46
RPLP1	P05386	0.0254282	-1.79
RPLP2	P05387	0.186963	-0.842
RPN1	P04843	0.0994114	-1.16
RPS10	P46783	0.204677	-1.04
RPS11	P62280	0.674442	-0.414
RPS12	P25398	0.219375	0.556
RPS13	P62277	0.925509	-0.0766
RPS14	P62263	0.607674	-0.244
RPS15	P62841	0.362843	0.568
RPS16	P62249	0.579586	0.436
RPS17	P08708	0.549698	0.489
RPS18	P62269	0.586468	-0.287
RPS19	P39019	0.429824	0.494
RPS2	P15880	0.165506	-0.641
RPS20	P60866	0.334631	-0.365
RPS21	P63220	0.224406	0.765
RPS23	P62266	0.502555	0.365
RPS24	P62847	0.208575	0.54
RPS25	P62851	0.404572	0.318
RPS27A	P62979	0.358595	-0.496
RPS27L	Q71UM5	0.235927	-0.813
RPS28	P62857	0.932273	0.0397
RPS29	P62273	0.588048	0.205
RPS3	P23396	0.999071	-0.000797
RPS3A	P61247	0.064503	-1.46
RPS4X	P62701	0.22729	-0.742
RPS5	P46782	0.0501104	-1.03
RPS6	P62753	0.203656	-0.857
RPS7	P62081	0.684815	0.264
RPS8	P62241	0.879436	-0.0784
RPSA	P08865	0.234852	-1.13
RRBP1	Q9P2E9	0.110259	-0.958
RRM2B	Q7LG56	0.469153	0.538
RRS1	Q15050	0.600344	0.394
RTN3	O95197	0.278593	0.666
RTN4	Q9NQC3	0.690246	-0.505
RUVBL1	Q9Y265	0.576165	-0.222
RUVBL2	Q9Y230	0.513817	-0.402
S100A10	P60903	0.307379	-0.688
S100A11	P31949	0.12352	-1.57
S100A13	Q99584	0.00552841	-1.92
S100A16	Q96FQ6	0.276221	-0.746
S100A6	P06703	0.22459	0.78
S100A7A	Q86SG5	0.200679	0.758
S100B	P04271	0.17959	-0.835
SAFB	Q15424	0.836247	0.249
SAFB2	Q14151	0.00793614	1.67
SAMD9L	Q8IVG5	0.158459	1.04
SARNP	P82979	0.797956	0.19
SARS	P49591	0.647422	-0.301
SART3	Q15020	0.0263479	-1.36
SCAMP1	O15126	0.730425	0.233
SCAMP3	O14828	0.639944	-0.281
SCD	O00767	0.995756	-0.00354
SCFD1	Q8WVM8	0.294199	0.571
SCOC	Q9UIL1	0.659261	-0.275
SCP2	P22307	0.517234	0.453
SCRN1	Q12765	0.141195	0.87
SDF2	Q99470	0.592464	-0.397
SDF4	Q9BRK5	0.346385	-0.549
SEC13	P55735	0.710626	-0.228
SEC16A	O15027	0.482658	-0.433
SEC22B	O75396	0.406236	-0.511
SEC24B	O95487	0.900392	0.0751
SEC31A	O94979	0.152048	-0.891
SEC61B	P60468	0.652926	0.243
SEC61G	P60059	0.857842	-0.0984
SEPT11	Q9NVA2	0.65717	0.275
SEPT2	Q15019	0.275037	-1.26
SEPT7	Q16181	0.384324	-0.67
SEPT9	Q9UHD8	0.969652	0.019
SERBP1	Q8NC51	0.0550501	-1.55
SERPINH1	P50454	0.641376	-0.623
SET	Q01105	0.0687128	-2.1
SF1	Q15637	0.836791	0.133
SF3A1	Q15459	0.865841	-0.105
SF3A3	Q12874	0.515987	0.375
SF3B1	O75533	0.982822	-0.0119
SF3B2	Q13435	0.0821825	-0.914
SF3B5	Q9BWJ5	0.683795	0.268
SFPQ	P23246	0.652157	0.556
SFXN3	Q9BWM7	0.851094	0.113
SGTA	O43765	0.851624	0.101
SH3BGRL	O75368	0.421605	-0.468
SH3BGRL3	Q9H299	0.995814	0.00709
SH3GL1	Q99961	0.948912	-0.0392
SH3GLB1	Q9Y371	0.359809	-0.539
SH3PXD2B	A1X283	0.10844	1.04
SHROOM3	Q8TF72	0.994506	0.00448
SIAE	Q9HAT2	0.708542	-0.207
SLC25A11	Q02978	0.354403	0.503
SLC25A12	O75746	0.728271	-0.228
SLC25A4	P12235	0.809559	-0.148
SLC25A5	P05141	0.592088	-0.473
SLC25A6	P12236	0.231315	-1.19
SLC3A2	P08195	0.428665	0.477
SLC7A5	Q01650	0.399543	-0.522
SLC9A3R1	O14745	0.421079	0.549
SLIRP	Q9GZT3	0.0983626	1.15
SLITRK3	O94933	0.0765579	-0.924
SLTM	Q9NWH9	0.565661	-0.439
SMAP	O00193	0.257092	-0.657
SMARCD3	Q6STE5	0.781855	0.174
SNAP29	O95721	0.28302	-0.673
SNAPIN	O95295	0.103024	-0.956
SNCA	P37840	0.664365	0.295
SND1	Q7KZF4	0.919185	-0.0442
SNRPD1	P62314	0.073423	-1.23
SNRPD2	P62316	0.250204	-0.649
SNRPD3	P62318	0.157454	0.632
SNRPE	P62304	0.950388	0.031
SNRPF	P62306	0.436096	-0.482
SNRPG	P62308	0.468777	-0.372
SNX12	Q9UMY4	0.506686	0.288
SNX3	O60493	0.31904	-0.722
SNX6	Q9UNH7	0.902364	0.0728
SOD1	P00441	0.0386741	-1.88
SON	P18583	0.278377	0.657
SORBS1	Q9BX66	0.162434	-0.814
SORBS2	O94875	0.697103	0.226
SORD	Q00796	0.400687	-0.561
SOWAHB	A6NEL2	0.0292638	-1.26
SPAG7	O75391	0.813146	-0.144
SPAG9	O60271	0.689159	-0.156
SPARC	P09486	0.57101	-0.387
SPC24	Q8NBT2	0.543942	0.421
SPCS2	Q15005	0.596487	-0.368
SPG20	Q8N0X7	0.492752	0.435
SPTA1	P02549	0.190472	0.87
SPTAN1	Q13813	0.384084	-0.714
SPTBN1	Q01082	0.0769883	-1.67
SRA1	Q9HD15	0.0672051	-1.11
SREBF1	P36956	0.186458	-0.833
SRP14	P37108	0.871794	-0.0854
SRP9	P49458	0.965878	-0.0314
SRPRB	Q9Y5M8	0.941763	-0.0494
SRRM2	Q9UQ35	0.531845	0.441
SRSF10	O75494	0.756714	0.216
SRSF2	Q01130	0.830111	-0.116
SRSF3	P84103	0.802044	0.175
SRSF6	Q13247	0.185984	0.996
SRSF9	Q13242	0.511286	-0.438
SSB	P05455	0.964669	0.0241
SSBP1	Q04837	0.986592	-0.0169
SSRP1	Q08945	0.060781	-1.19
SSSCA1	O60232	0.855942	-0.115
SST	P61278	0.57839	0.323
ST13	P50502	0.440825	-0.573
STATH	P02808	0.464369	-0.54
STAU1	O95793	0.320546	0.611
STIM1	Q13586	0.51968	0.303
STIP1	P31948	0.34514	-0.759
STMN1	P16949	0.922032	-0.135
STMN2	Q93045	0.673503	-0.24
STRAP	Q9Y3F4	0.292754	-0.702
STRN3	Q13033	0.84409	-0.112
STX4	Q12846	0.477665	-0.341
STX7	O15400	0.303693	-0.65
SUB1	P53999	0.119528	-1.41
SUMO4	Q6EEV6	0.243854	0.777
SUN1	O94901	0.346728	0.574
SUPT16H	Q9Y5B9	0.774767	-0.159
SVIL	O95425	0.659869	0.356
SYNC	Q9H7C4	0.764271	0.163
SYNCRIP	O60506	0.41616	0.569
SYNM	O15061	0.725666	-0.522
SYNPO	Q8N3V7	0.156271	0.955
TAB2	Q9NYJ8	0.290622	0.702
TAGLN	Q01995	0.979207	0.0449
TAGLN2	P37802	0.647303	-0.669
TAGLN3	Q9UI15	0.977182	-0.0136
TALDO1	P37837	0.0832148	-0.91
TAX1BP3	O14907	0.0544026	1.47
TBCA	O75347	0.730713	-0.407
TBCB	Q99426	0.973324	-0.0166
TCEA1	P23193	0.162041	-0.978
TCEA3	O75764	0.412223	-0.6
TCEAL3	Q969E4	0.997151	0.00193
TCEB2	Q15370	0.895019	0.09
TCP1	P17987	0.321963	-0.613
TES	Q9UGI8	0.104443	-0.949
TFAM	Q00059	0.247599	-0.639
TFG	Q92734	0.902285	0.0846
TFRC	P02786	0.537668	0.412
TGFB1I1	O43294	0.953074	0.061
THOC1	Q96FV9	0.403032	0.481
THRAP3	Q9Y2W1	0.727396	-0.261
THUMPD1	Q9NXG2	0.972545	0.0205
TIMM10	P62072	0.0561516	-0.995
TIMM9	Q9Y5J7	0.470367	-0.406
TJP1	Q07157	0.973298	-0.02
TKT	P29401	0.30968	-1.29
TLN1	Q9Y490	0.379533	-1.06
TMEM263	Q8WUH6	0.0543773	1.36
TMOD3	Q9NYL9	0.849559	-0.138
TMSB10	P63313	0.567818	-0.995
TMSB15B	P0CG35	0.193807	-0.798
TMSB4X	P62328	0.912879	0.151
TNKS1BP1	Q9C0C2	0.142988	-0.991
TNS3	Q68CZ2	0.0325768	1.53
TOLLIP	Q9H0E2	0.967111	-0.0315
TOM1L2	Q6ZVM7	0.00122136	-1.78
TOMM6	Q96B49	0.0547001	1.2
TOR1AIP1	Q5JTV8	0.110197	-0.863
TPBG	Q13641	0.506547	-0.383
TPD52L2	O43399	0.0554782	-2.04
TPI1	P60174	0.282011	-1.43
TPM1	P09493	0.925525	0.0464
TPM2	P07951	0.500451	0.477
TPM3	P06753	0.906931	-0.0712
TPM4	P67936	0.7929	-0.11
TPP1	O14773	0.136621	-1.13
TPP2	P29144	0.633234	-0.333
TPPP	O94811	0.247616	-0.8
TPPP3	Q9BW30	0.835334	-0.24
TPR	P12270	0.375432	0.609
TPT1	P13693	0.23528	-0.758
TRIM16	O95361	0.197855	0.923
TRIM28	Q13263	0.625532	-0.475
TRIP6	Q15654	0.895605	0.0879
TRMT112	Q9UI30	0.623697	-0.341
TRO	Q12816	0.128189	1.1
TUBA1A	Q71U36	0.569287	-0.482
TUBA1B	P68363	0.0714038	-1.29
TUBA1C	Q9BQE3	0.574647	0.324
TUBB	P07437	0.984025	-0.0267
TUBB2A	Q13885	0.961385	-0.0429
TUBB2B	Q9BVA1	0.91874	-0.11
TUBB3	Q13509	0.770325	-0.189
TUBB4A	P04350	0.789979	-0.169
TUBB4B	P68371	0.482516	-0.544
TUBB6	Q9BUF5	0.111084	-1.24
TUBB8	Q3ZCM7	0.0191991	-1.87
TUBGCP5	Q96RT8	0.48328	-0.396
TUFM	P49411	0.64964	-0.325
TWF1	Q12792	0.799906	-0.137
TWF2	Q6IBS0	0.709333	-0.215
TXLNG	Q9NUQ3	0.739188	-0.202
TXN	P10599	0.285933	-0.88
TXNDC12	O95881	0.0830663	1.11
TXNDC17	Q9BRA2	0.515314	-0.426
TXNRD1	Q16881	0.322375	-0.78
UBA1	P22314	0.0909621	-1.22
UBA52	P62987	0.351428	-0.549
UBAP2L	Q14157	0.676636	0.287
UBE2L3	P68036	0.4771	-0.424
UBE2N	P61088	0.326607	-0.696
UBE2V1	Q13404	0.769899	-0.188
UBE2V2	Q15819	0.438062	-0.603
UBE3C	Q15386	0.785265	-0.194
UBN2	Q6ZU65	0.220401	0.873
UBQLN1	Q9UMX0	0.461533	0.481
UBQLN2	Q9UHD9	0.172067	-1.04
UBXN1	Q04323	0.0955733	-0.935
UCHL1	P09936	0.758165	0.375
UFD1L	Q92890	0.463055	-0.553
UGP2	Q16851	0.607887	-0.298
UPF1	Q92900	0.489247	-0.372
UQCRC1	P31930	0.117401	0.965
UQCRC2	P22695	0.883352	-0.0733
UQCRHL	A0A096LP55	0.333385	-0.458
USO1	O60763	0.93897	-0.0476
USP14	P54578	0.271032	-0.64
USP5	P45974	0.52432	-0.499
USP9X	Q93008	0.714055	-0.222
VAMP3	Q15836	0.514547	-0.391
VARS	P26640	0.0755824	-0.981
VASP	P50552	0.950454	-0.0512
VAT1	Q99536	0.655233	-0.283
VBP1	P61758	0.828075	0.121
VCL	P18206	0.20397	-1.56
VCP	P55072	0.950521	0.0739
VDAC1	P21796	0.549343	0.425
VDAC2	P45880	0.500185	-0.476
VIM	P08670	0.664315	-0.444
VPS37B	Q9H9H4	0.14042	-0.818
VTA1	Q9NP79	0.17006	-0.748
WARS	P23381	0.614357	-0.378
WDR1	O75083	0.788458	-0.144
WIBG	Q9BRP8	0.197863	-0.739
XPNPEP1	Q9NQW7	0.469655	-0.425
XRCC5	P13010	0.28425	-0.618
XRCC6	P12956	0.304407	-0.582
YAP1	P46937	0.940274	-0.0459
YARS	P54577	0.553374	0.397
YBX1	P67809	0.197382	-0.601
YBX3	P16989	0.779826	-0.189
YWHAB	P31946	0.716327	-0.47
YWHAE	P62258	0.801573	-0.341
YWHAG	P61981	0.562323	0.656
YWHAH	Q04917	0.901843	-0.112
YWHAQ	P27348	0.827976	-0.238
YWHAZ	P63104	0.836513	-0.257
ZC4H2	Q9NQZ6	0.11759	-1.03
ZNF207	O43670	0.35421	-0.498
ZNF326	Q5BKZ1	0.647199	0.352
ZNF428	Q96B54	0.201125	-0.677
ZNF512	Q96ME7	0.807033	0.193
ZYX	Q15942	0.962752	-0.0539

## Sheet: S3. VCP SOD1 C9 FUS overlap
			VCP			C9orf72			SOD1			FUS				Table S3. Differentially gene expression in VCP, SOD1, C9orf72 and FUS mutant hiPSC astrocytes
gene_name	hsap.ensembl	overlap	log2FC.VCP	FDR.VCP	direction	log2FC.C9orf72	FDR.C9orf72	direction	log2FC.SOD1	FDR.SOD1	direction	log2FC.FUS	FDR.FUS	direction		log2FC: log2 Fold Change in ALS mutant vs control
GJB2	ENSG00000165474	overlapping up	3.82829	1.11566e-05	up	3.63969	1.49395e-08	up	4.03835	2.89763e-10	up	5.9487	1.17222e-10	up		FDR: false discovery rate (adjusted P value)
LRRC3B	ENSG00000179796	overlapping down	-5.81809	8.75599e-06	down	-3.05351	0.0077479	down	-3.27427	2.16526e-06	down	-3.96633	2.37203e-06	down		direction: change in gene expression when FDR < 0.05 (up indicated upregulated in ALS mutant and vice versa).
MOB3B	ENSG00000120162	overlapping down	-1.51482	0.0317177	down	-1.61	0.0188752	down	-2.38694	8.9809e-05	down	-1.45461	0.00224144	down
GATD3A	ENSG00000160221	VCP C9orf72 SOD1 up	2.81424	7.65353e-08	up	1.51245	0.000619867	up	2.40961	1.48021e-06	up	-2.55568	6.28863e-55	down
PLN	ENSG00000198523	VCP C9orf72 SOD1 up	4.66315	0.00114014	up	4.32277	5.91695e-25	up	6.66319	7.3201e-05	up	1.99776	0.504532	non-significant
IGFBP5	ENSG00000115461	VCP C9orf72 SOD1 up	1.80475	0.0246184	up	2.62766	0.00499091	up	1.10402	0.000116169	up	0.40808	0.536221	non-significant
RYR2	ENSG00000198626	VCP C9orf72 SOD1 down	-3.50431	1.66207e-09	down	-4.40041	0.000246399	down	-5.32916	5.21904e-23	down	-1.47019	0.414371	non-significant
BRINP2	ENSG00000198797	VCP C9orf72 SOD1 down	-2.46315	0.039973	down	-4.01972	0.00101599	down	-4.21932	0.00722045	down	-2.27797	NA	non-significant
CALB2	ENSG00000172137	VCP C9orf72 FUS up	2.6444	0.000238558	up	2.8684	2.06539e-06	up	1.03614	0.418706	non-significant	2.75915	0.0138944	up
SMOC1	ENSG00000198732	VCP C9orf72 FUS down	-4.3493	9.01641e-08	down	-3.83285	0.0140734	down	-3.18718	0.122321	non-significant	-1.98487	0.00649958	down
NPY	ENSG00000122585	VCP C9orf72 FUS down	-2.79225	0.0149697	down	-3.43954	0.0100424	down	4.24984	0.116022	non-significant	-5.27055	7.34125e-07	down
DACT2	ENSG00000164488	VCP C9orf72 FUS down	-4.73973	0.0223322	down	-6.73775	9.82909e-06	down	-0.567605	0.603948	non-significant	-2.54868	0.00450748	down
PPP1R3C	ENSG00000119938	VCP SOD1 FUS up	4.46583	0.000800998	up	0.959135	0.206656	non-significant	2.11201	0.000928787	up	1.13692	0.0152311	up
ERAP2	ENSG00000164308	VCP SOD1 FUS up	2.48208	0.00229726	up	0.941233	0.797089	non-significant	4.09614	2.60911e-08	up	3.89958	8.0595e-20	up
ACTC1	ENSG00000159251	VCP SOD1 FUS up	2.64232	0.0129661	up	1.58226	0.601702	non-significant	2.94075	0.0216139	up	4.11915	6.22086e-12	up
GAD2	ENSG00000136750	VCP SOD1 FUS down	-5.02105	3.11576e-05	down	-3.14338	0.555618	non-significant	-5.25059	0.00021874	down	-5.13834	0.00139127	down
CNTN4	ENSG00000144619	VCP SOD1 FUS down	-3.53043	0.000129959	down	0.623221	0.967097	non-significant	-7.65952	5.77287e-12	down	-2.49806	3.31318e-08	down
SLCO1C1	ENSG00000139155	VCP SOD1 FUS down	-2.55112	0.0122825	down	-4.19175	0.0987922	non-significant	-3.44001	8.29753e-08	down	-4.56646	4.09875e-06	down
SORCS1	ENSG00000108018	VCP SOD1 FUS down	-3.67928	0.0285829	down	-3.58515	0.115019	non-significant	-6.52846	4.95097e-24	down	-3.00556	4.30036e-06	down
GABRA2	ENSG00000151834	VCP SOD1 FUS down	-6.02127	0.0465538	down	-0.999389	NA	non-significant	-5.16775	0.0118345	down	-2.75227	1.2835e-09	down
GREM1	ENSG00000166923	C9orf72 SOD1 FUS up	1.87257	0.121374	non-significant	2.66119	0.00415285	up	3.80334	1.72318e-13	up	0.952135	3.76442e-05	up
RPL13P12	ENSG00000215030	C9orf72 SOD1 FUS up	3.55125	0.134891	non-significant	4.92546	0.00693262	up	4.95182	5.5131e-26	up	5.37118	3.94297e-85	up
IGFBP3	ENSG00000146674	C9orf72 SOD1 FUS up	1.37594	0.163652	non-significant	3.33687	0.029464	up	3.90758	6.29909e-10	up	2.90164	5.89028e-19	up
FIBCD1	ENSG00000130720	C9orf72 SOD1 FUS up	1.55357	0.242431	non-significant	2.44145	0.00286464	up	3.25852	0.00492162	up	2.41226	2.76455e-07	up
VDR	ENSG00000111424	C9orf72 SOD1 FUS up	1.9188	0.334448	non-significant	2.16752	0.00911417	up	2.97347	0.0481113	up	1.02888	0.0431836	up
PLOD2	ENSG00000152952	C9orf72 SOD1 FUS up	1.70044	0.358438	non-significant	2.76828	4.57565e-06	up	1.89585	3.39602e-12	up	1.54833	0.000529829	up
C5orf46	ENSG00000178776	C9orf72 SOD1 FUS up	1.67244	0.420694	non-significant	4.20944	6.15093e-06	up	5.74587	1.55942e-07	up	4.01513	1.00968e-06	up
TENM2	ENSG00000145934	C9orf72 SOD1 FUS up	1.00903	0.72616	non-significant	2.7351	1.67406e-05	up	2.35342	1.22038e-25	up	0.922643	0.00991083	up
TGFBI	ENSG00000120708	C9orf72 SOD1 FUS up	1.73939	0.732939	non-significant	4.38998	1.15884e-11	up	3.58013	2.23179e-13	up	0.824833	0.0337091	up
PTK7	ENSG00000112655	C9orf72 SOD1 FUS up	1.03775	0.862418	non-significant	1.79191	0.00608937	up	1.23027	3.93625e-06	up	1.48291	2.23699e-06	up
AC037198.1	ENSG00000276107	C9orf72 SOD1 FUS up	-2.02974	0.895824	non-significant	2.24062	0.00479982	up	3.31491	0.00298207	up	2.13491	0.00520738	up
ITIH5	ENSG00000123243	C9orf72 SOD1 FUS up	-1.54565	0.897304	non-significant	2.85616	7.47505e-06	up	3.15889	3.18548e-22	up	1.15895	7.74464e-06	up
IGFL3	ENSG00000188624	C9orf72 SOD1 FUS up	2.25618	0.94008	non-significant	9.21914	1.80828e-65	up	5.12863	0.0129233	up	4.65752	5.01536e-06	up
ELN	ENSG00000049540	C9orf72 SOD1 FUS up	-0.337842	0.999968	non-significant	2.58051	0.00693262	up	3.81942	2.84273e-06	up	1.46023	0.0103962	up
P4HA2	ENSG00000072682	C9orf72 SOD1 FUS up	1.09439	0.999968	non-significant	2.77763	0.00454734	up	0.975547	0.0400463	up	1.34537	1.30259e-06	up
SEMA3C	ENSG00000075223	C9orf72 SOD1 FUS up	0.862977	0.999968	non-significant	2.22823	0.000577729	up	1.93107	0.000129799	up	0.714752	9.00182e-10	up
FNDC3B	ENSG00000075420	C9orf72 SOD1 FUS up	0.274907	0.999968	non-significant	1.28076	0.0208388	up	1.09338	0.000646531	up	0.469544	0.0006887	up
LPCAT2	ENSG00000087253	C9orf72 SOD1 FUS up	0.46195	0.999968	non-significant	2.97463	0.000767755	up	2.05917	8.42042e-08	up	1.9574	0.00280353	up
CEMIP	ENSG00000103888	C9orf72 SOD1 FUS up	-0.0738798	0.999968	non-significant	2.59958	0.000732795	up	3.53076	7.64309e-05	up	2.46976	8.73318e-13	up
SFRP4	ENSG00000106483	C9orf72 SOD1 FUS up	-0.0909066	0.999968	non-significant	4.35875	0.000214773	up	3.29014	4.52262e-12	up	2.40418	3.90535e-06	up
LOX	ENSG00000113083	C9orf72 SOD1 FUS up	0.976581	0.999968	non-significant	3.46321	0.000302992	up	2.50246	4.70887e-21	up	2.07288	0.000111252	up
SPARC	ENSG00000113140	C9orf72 SOD1 FUS up	0.913653	0.999968	non-significant	1.71573	0.0245363	up	1.31418	0.00475441	up	0.720485	4.19019e-05	up
SSR3	ENSG00000114850	C9orf72 SOD1 FUS up	-0.103652	0.999968	non-significant	1.20627	0.00658082	up	0.787343	0.000834093	up	0.497736	0.000116856	up
FOXP1	ENSG00000114861	C9orf72 SOD1 FUS up	0.407889	0.999968	non-significant	1.94147	0.00231314	up	1.43283	2.09005e-06	up	1.09857	7.38786e-06	up
FN1	ENSG00000115414	C9orf72 SOD1 FUS up	1.95091	0.999968	non-significant	5.86256	1.45412e-12	up	3.85531	1.4987e-16	up	1.13506	0.0391388	up
C1orf198	ENSG00000119280	C9orf72 SOD1 FUS up	0.458861	0.999968	non-significant	1.98471	4.18153e-05	up	2.01953	1.28667e-12	up	0.821702	0.0365643	up
LTBP2	ENSG00000119681	C9orf72 SOD1 FUS up	-0.254189	0.999968	non-significant	4.45257	1.53442e-14	up	5.18139	5.70218e-35	up	1.01973	0.0302312	up
INHBA	ENSG00000122641	C9orf72 SOD1 FUS up	1.8454	0.999968	non-significant	4.40328	1.97195e-08	up	3.214	2.61164e-05	up	1.12795	0.00152412	up
P4HA1	ENSG00000122884	C9orf72 SOD1 FUS up	0.8548	0.999968	non-significant	1.70748	0.0470401	up	1.11794	7.32471e-06	up	0.635546	0.00546687	up
LRP1	ENSG00000123384	C9orf72 SOD1 FUS up	0.591805	0.999968	non-significant	1.94823	0.000224545	up	0.654314	0.0304553	up	0.360065	0.0126962	up
BMP4	ENSG00000125378	C9orf72 SOD1 FUS up	-0.431029	0.999968	non-significant	4.91484	5.02585e-09	up	2.71745	0.00981691	up	0.838988	1.03358e-06	up
RRBP1	ENSG00000125844	C9orf72 SOD1 FUS up	0.409292	0.999968	non-significant	1.70504	0.00261034	up	1.95665	4.35865e-20	up	0.450958	0.00115806	up
THBS1	ENSG00000137801	C9orf72 SOD1 FUS up	-0.632544	0.999968	non-significant	3.50149	1.56867e-07	up	3.60282	0.00372484	up	1.64085	9.4218e-05	up
LOXL4	ENSG00000138131	C9orf72 SOD1 FUS up	-0.15835	0.999968	non-significant	3.54459	0.00106852	up	4.63648	5.27271e-25	up	3.14299	9.09905e-10	up
SERPINH1	ENSG00000149257	C9orf72 SOD1 FUS up	0.659933	0.999968	non-significant	1.88072	1.93384e-06	up	1.53439	1.15609e-05	up	0.665036	0.00716977	up
MMP14	ENSG00000157227	C9orf72 SOD1 FUS up	0.570826	0.999968	non-significant	2.83453	4.66661e-11	up	1.94685	1.49146e-06	up	0.81847	1.77906e-05	up
OLFML2B	ENSG00000162745	C9orf72 SOD1 FUS up	0.352515	0.999968	non-significant	1.63034	0.00105564	up	1.84003	0.00919073	up	0.439183	0.0093712	up
ANXA5	ENSG00000164111	C9orf72 SOD1 FUS up	0.050108	0.999968	non-significant	1.34284	0.0339755	up	1.12052	0.00108173	up	0.585335	8.23663e-05	up
SPTLC3	ENSG00000172296	C9orf72 SOD1 FUS up	0.0530883	0.999968	non-significant	2.80509	0.00263785	up	4.41947	1.31692e-05	up	1.22473	0.0490936	up
GXYLT2	ENSG00000172986	C9orf72 SOD1 FUS up	0.976792	0.999968	non-significant	2.46489	0.0245662	up	3.35348	1.10505e-20	up	1.69063	1.73048e-08	up
EPS8L2	ENSG00000177106	C9orf72 SOD1 FUS up	-0.303484	0.999968	non-significant	3.28633	1.19644e-12	up	1.96793	0.0373171	up	1.24899	0.00399251	up
VWA1	ENSG00000179403	C9orf72 SOD1 FUS up	0.666558	0.999968	non-significant	2.25024	0.00598433	up	2.00505	0.00718522	up	1.10394	0.016069	up
GAS6	ENSG00000183087	C9orf72 SOD1 FUS up	0.714721	0.999968	non-significant	2.83002	5.44997e-05	up	0.990225	0.00934877	up	1.07687	1.96333e-08	up
AHNAK2	ENSG00000185567	C9orf72 SOD1 FUS up	-0.465861	0.999968	non-significant	1.48249	0.00195601	up	1.48191	2.66197e-05	up	1.32079	0.00144523	up
ADAMTSL2	ENSG00000197859	C9orf72 SOD1 FUS up	-0.626608	0.999968	non-significant	2.20944	0.00167245	up	2.47589	0.00955267	up	1.89779	0.0222015	up
P2RY1	ENSG00000169860	C9orf72 SOD1 FUS down	-1.54629	0.237132	non-significant	-2.47325	0.00270238	down	-0.817895	0.0483113	down	-1.39139	0.019405	down
CNR1	ENSG00000118432	C9orf72 SOD1 FUS down	-1.33705	0.606674	non-significant	-3.62503	0.00933745	down	-4.51772	1.93098e-22	down	-2.16485	0.0304779	down
DPF1	ENSG00000011332	C9orf72 SOD1 FUS down	-0.537409	0.999968	non-significant	-2.02015	0.0197385	down	-1.8435	0.0126294	down	-1.86704	0.000536474	down
NGEF	ENSG00000066248	C9orf72 SOD1 FUS down	-0.152794	0.999968	non-significant	-3.62423	9.38043e-05	down	-1.49686	0.0030914	down	-3.84584	4.44384e-06	down
CAMK2A	ENSG00000070808	C9orf72 SOD1 FUS down	0.135166	0.999968	non-significant	-3.37894	1.87282e-05	down	-2.18561	0.000899427	down	-1.7707	0.00198974	down
PAG1	ENSG00000076641	C9orf72 SOD1 FUS down	0.0330019	0.999968	non-significant	-2.19534	0.00291089	down	-4.30642	6.59398e-17	down	-1.82586	0.0131662	down
PAK3	ENSG00000077264	C9orf72 SOD1 FUS down	-0.133719	0.999968	non-significant	-2.09352	0.0365058	down	-0.989337	0.00642457	down	-1.9601	3.85872e-07	down
DCX	ENSG00000077279	C9orf72 SOD1 FUS down	-1.51241	0.999968	non-significant	-6.13114	1.97381e-05	down	-6.48971	2.58613e-64	down	-2.23757	0.013928	down
ADCYAP1R1	ENSG00000078549	C9orf72 SOD1 FUS down	-1.13158	0.999968	non-significant	-4.08455	1.16611e-13	down	-1.96582	1.36917e-07	down	-3.08786	0.000439696	down
MYBPC2	ENSG00000086967	C9orf72 SOD1 FUS down	-0.42031	0.999968	non-significant	-3.20101	0.000213284	down	-3.26904	0.0249686	down	-2.4381	0.0430439	down
KCNK10	ENSG00000100433	C9orf72 SOD1 FUS down	-1.30386	0.999968	non-significant	-6.05683	2.84284e-08	down	-3.14732	8.89525e-06	down	-4.85	4.02574e-07	down
SLC8A3	ENSG00000100678	C9orf72 SOD1 FUS down	0.771459	0.999968	non-significant	-3.18949	0.00364479	down	-4.0828	0.000114537	down	-4.28038	0.000225637	down
SLCO4A1	ENSG00000101187	C9orf72 SOD1 FUS down	0.289522	0.999968	non-significant	-2.96438	0.00461058	down	-3.84111	0.00735372	down	-3.64275	0.00995634	down
SLC1A6	ENSG00000105143	C9orf72 SOD1 FUS down	0.0848926	0.999968	non-significant	-5.37416	0.000146615	down	-5.22242	0.000488389	down	-2.24225	0.00961094	down
EBF3	ENSG00000108001	C9orf72 SOD1 FUS down	0.0718033	0.999968	non-significant	-4.23757	0.000798441	down	-7.0029	1.35088e-08	down	-2.36774	0.00919765	down
EFNB3	ENSG00000108947	C9orf72 SOD1 FUS down	-1.34693	0.999968	non-significant	-2.28136	0.000279189	down	-1.89785	4.71258e-06	down	-1.62358	3.17874e-05	down
NRXN2	ENSG00000110076	C9orf72 SOD1 FUS down	-0.339237	0.999968	non-significant	-4.72174	2.71137e-07	down	-5.83212	1.21423e-19	down	-2.17981	8.00582e-05	down
HMGCR	ENSG00000113161	C9orf72 SOD1 FUS down	-0.590861	0.999968	non-significant	-1.31208	0.0159667	down	-2.1728	4.95833e-10	down	-0.704178	0.0365871	down
PDE8B	ENSG00000113231	C9orf72 SOD1 FUS down	-1.7055	0.999968	non-significant	-2.02114	0.000541409	down	-2.24192	0.00069119	down	-2.36529	0.00106584	down
PLPPR5	ENSG00000117598	C9orf72 SOD1 FUS down	0.159249	0.999968	non-significant	-3.4736	9.16045e-05	down	-2.25589	0.00036761	down	-2.04133	0.0102072	down
SPP1	ENSG00000118785	C9orf72 SOD1 FUS down	1.0048	0.999968	non-significant	-1.51172	0.0234808	down	-2.67955	3.0192e-11	down	-3.11533	6.63727e-05	down
PCDH17	ENSG00000118946	C9orf72 SOD1 FUS down	0.217129	0.999968	non-significant	-1.90906	0.0243359	down	-1.53642	1.70562e-06	down	-1.92473	2.15664e-05	down
PREX1	ENSG00000124126	C9orf72 SOD1 FUS down	-0.288807	0.999968	non-significant	-2.03466	0.0361831	down	-2.01761	9.41242e-06	down	-2.27126	0.000123049	down
KIRREL2	ENSG00000126259	C9orf72 SOD1 FUS down	-0.0406963	0.999968	non-significant	-2.0448	0.0443973	down	-4.23751	3.18831e-06	down	-1.61836	0.0104985	down
ATP1B2	ENSG00000129244	C9orf72 SOD1 FUS down	-1.32249	0.999968	non-significant	-1.70265	0.044209	down	-0.993831	3.85397e-05	down	-1.32277	0.020277	down
SYT5	ENSG00000129990	C9orf72 SOD1 FUS down	-0.115202	0.999968	non-significant	-1.96029	0.0276928	down	-2.82693	0.0278259	down	-2.6304	0.0159538	down
FIGNL1	ENSG00000132436	C9orf72 SOD1 FUS down	-0.431408	0.999968	non-significant	-1.6205	0.0120166	down	-2.82076	8.32572e-07	down	-0.838047	0.00465594	down
RNFT2	ENSG00000135119	C9orf72 SOD1 FUS down	-0.281349	0.999968	non-significant	-1.85024	0.0431483	down	-0.910346	0.0441207	down	-1.36142	0.0314385	down
FAM181A	ENSG00000140067	C9orf72 SOD1 FUS down	-0.862	0.999968	non-significant	-3.67702	7.44749e-05	down	-1.34384	0.0010695	down	-2.30299	0.00128082	down
TTYH2	ENSG00000141540	C9orf72 SOD1 FUS down	-0.485128	0.999968	non-significant	-1.94585	0.0214888	down	-1.31922	7.5622e-05	down	-1.08557	0.0104041	down
RNF165	ENSG00000141622	C9orf72 SOD1 FUS down	-0.642965	0.999968	non-significant	-2.76297	0.00380541	down	-7.1516	1.48676e-18	down	-1.66637	0.0112276	down
CNGA3	ENSG00000144191	C9orf72 SOD1 FUS down	-0.766755	0.999968	non-significant	-3.09572	0.0308262	down	-1.2494	0.0322108	down	-3.57796	0.00383498	down
CPLX2	ENSG00000145920	C9orf72 SOD1 FUS down	-0.0163805	0.999968	non-significant	-3.72197	9.16045e-05	down	-6.61353	2.24546e-18	down	-3.04188	0.000519213	down
CSGALNACT1	ENSG00000147408	C9orf72 SOD1 FUS down	0.486854	0.999968	non-significant	-4.67254	0.00108044	down	-2.12389	0.0100871	down	-1.38048	0.0095908	down
SHC3	ENSG00000148082	C9orf72 SOD1 FUS down	0.0452384	0.999968	non-significant	-2.60619	2.67674e-08	down	-1.64066	8.27485e-08	down	-1.42523	0.0157522	down
AKAP6	ENSG00000151320	C9orf72 SOD1 FUS down	-0.860881	0.999968	non-significant	-2.30061	0.000231525	down	-1.72609	1.79558e-09	down	-1.48507	0.0058499	down
RNF144A	ENSG00000151692	C9orf72 SOD1 FUS down	-0.0233629	0.999968	non-significant	-2.52362	0.0280551	down	-1.49499	0.00181539	down	-1.15786	0.0292986	down
ASTN1	ENSG00000152092	C9orf72 SOD1 FUS down	-1.1772	0.999968	non-significant	-3.55312	0.0124666	down	-2.70909	1.46895e-18	down	-2.34361	0.00282304	down
RAB3C	ENSG00000152932	C9orf72 SOD1 FUS down	0.347049	0.999968	non-significant	-5.4236	1.66993e-10	down	-5.63731	5.57154e-22	down	-3.01042	0.000734649	down
SCN3A	ENSG00000153253	C9orf72 SOD1 FUS down	-0.20317	0.999968	non-significant	-4.70261	8.82139e-05	down	-2.04541	3.94738e-09	down	-3.10946	3.9877e-08	down
PITPNC1	ENSG00000154217	C9orf72 SOD1 FUS down	-0.476824	0.999968	non-significant	-1.75828	0.0148107	down	-1.78538	0.000535005	down	-1.32062	0.00857912	down
TSPAN7	ENSG00000156298	C9orf72 SOD1 FUS down	0.392227	0.999968	non-significant	-2.67669	0.00218837	down	-4.15144	1.10505e-20	down	-3.49636	9.36064e-16	down
CELF3	ENSG00000159409	C9orf72 SOD1 FUS down	-0.223606	0.999968	non-significant	-4.84545	2.31794e-05	down	-6.04457	4.41234e-32	down	-2.83125	0.018549	down
KLHDC8A	ENSG00000162873	C9orf72 SOD1 FUS down	-0.543865	0.999968	non-significant	-3.46044	0.00068384	down	-1.25636	0.0298144	down	-1.90528	0.0202755	down
AMER2	ENSG00000165566	C9orf72 SOD1 FUS down	-1.21988	0.999968	non-significant	-4.1559	0.00144198	down	-4.73959	2.48664e-17	down	-2.29739	0.0103962	down
GNG4	ENSG00000168243	C9orf72 SOD1 FUS down	-1.47166	0.999968	non-significant	-4.07467	0.000224372	down	-1.95954	3.31513e-07	down	-3.79577	7.75803e-14	down
LRP1B	ENSG00000168702	C9orf72 SOD1 FUS down	-0.588559	0.999968	non-significant	-3.62142	0.0107385	down	-2.69052	2.18344e-05	down	-1.29697	0.000213475	down
VAT1L	ENSG00000171724	C9orf72 SOD1 FUS down	0.449986	0.999968	non-significant	-1.53757	0.0479342	down	-2.28029	4.9688e-05	down	-4.03479	1.05693e-10	down
GAP43	ENSG00000172020	C9orf72 SOD1 FUS down	0.101735	0.999968	non-significant	-3.06544	1.64798e-16	down	-2.61983	1.88726e-11	down	-1.59279	1.77887e-05	down
GPR19	ENSG00000183150	C9orf72 SOD1 FUS down	0.0786404	0.999968	non-significant	-3.95148	5.83607e-06	down	-2.15246	1.10275e-05	down	-2.14889	0.0310973	down
PDE4B	ENSG00000184588	C9orf72 SOD1 FUS down	0.114443	0.999968	non-significant	-2.29686	2.72448e-06	down	-2.26255	8.07298e-08	down	-0.966236	0.000930702	down
LYPD6	ENSG00000187123	C9orf72 SOD1 FUS down	-1.22621	0.999968	non-significant	-2.05503	0.020088	down	-2.01414	9.7141e-06	down	-0.898881	0.000401928	down
DNER	ENSG00000187957	C9orf72 SOD1 FUS down	-0.381274	0.999968	non-significant	-3.46624	1.33574e-07	down	-4.34867	7.30272e-09	down	-2.83724	0.00035286	down
GRM7	ENSG00000196277	C9orf72 SOD1 FUS down	-1.57484	0.999968	non-significant	-2.1425	0.000234582	down	-2.56559	0.00735294	down	-4.10878	0.00260139	down
BTBD17	ENSG00000204347	C9orf72 SOD1 FUS down	-1.4061	0.999968	non-significant	-6.33726	6.16734e-05	down	-3.76796	1.25023e-05	down	-3.30762	6.31529e-05	down
ZDHHC11B	ENSG00000206077	C9orf72 SOD1 FUS down	-0.653773	0.999968	non-significant	-2.29121	0.00169195	down	-1.24456	4.25561e-05	down	-2.30981	0.0426036	down
AC092821.2	ENSG00000214776	C9orf72 SOD1 FUS down	1.39537	0.999968	non-significant	-4.80756	6.86748e-06	down	-5.08318	0.000161606	down	-3.50131	0.0481481	down
AC016582.3	ENSG00000267640	C9orf72 SOD1 FUS down	-0.143552	0.999968	non-significant	-2.64257	6.92857e-09	down	-2.16312	0.00627403	down	-1.81035	0.0473563	down
HSD17B7P2	ENSG00000099251	VCP C9orf72 up	7.52675	7.65353e-08	up	4.43044	1.19376e-11	up	3.53701	0.0882503	non-significant	-7.17615	1.65985e-13	down
NKX2-5	ENSG00000183072	VCP C9orf72 up	4.83714	3.22985e-06	up	3.97777	0.0305582	up	-1.19043	NA	non-significant	0.00776748	NA	non-significant
FOXL2	ENSG00000183770	VCP C9orf72 up	4.03781	5.9801e-06	up	2.72496	0.0135327	up	0.926717	0.759723	non-significant	0.0998746	0.97126	non-significant
IGFL2-AS1	ENSG00000268621	VCP C9orf72 up	3.16384	4.94772e-05	up	3.22569	0.0154541	up	5.33276	NA	non-significant	2.11496	0.47016	non-significant
AL355916.1	ENSG00000232774	VCP C9orf72 up	4.86464	0.00583218	up	3.69422	0.00244447	up	1.73456	NA	non-significant	1.16373	0.209321	non-significant
NPPB	ENSG00000120937	VCP C9orf72 up	2.95053	0.010511	up	2.84632	0.0135967	up	0.651406	NA	non-significant	1.45439	NA	non-significant
LINC01303	ENSG00000250548	VCP C9orf72 up	4.68641	0.0106018	up	7.59152	2.89463e-06	up	-0.678406	NA	non-significant	0.388258	0.931134	non-significant
GOLGA8Q	ENSG00000178115	VCP C9orf72 up	2.40039	0.0317029	up	2.93515	0.014354	up	-0.713893	NA	non-significant	-0.983157	0.688216	non-significant
AL117339.5	ENSG00000283930	VCP C9orf72 up	3.7126	0.0466942	up	2.55257	0.000133852	up	1.10817	0.363384	non-significant	-5.42121	2.20327e-08	down
HSD17B6	ENSG00000025423	VCP C9orf72 up	2.76551	0.047442	up	2.50532	0.00177993	up	-1.15313	0.637852	non-significant	1.84387	0.179212	non-significant
LINC01206	ENSG00000242512	VCP C9orf72 down	-4.84708	2.52219e-05	down	-2.28021	0.0453685	down	-0.289931	0.913872	non-significant	1.09349	NA	non-significant
BMP5	ENSG00000112175	VCP C9orf72 down	-9.08676	0.00416594	down	-10.0808	0.00344347	down	-2.22172	0.274421	non-significant	-1.40123	0.233347	non-significant
AC087783.1	ENSG00000271369	VCP C9orf72 down	-2.71777	0.00896009	down	-2.52747	0.00389729	down	-2.09016	0.293112	non-significant	1.60841	0.00168144	up
AC089987.1	ENSG00000197376	VCP SOD1 up	10.1965	3.55436e-06	up	0.844609	NA	non-significant	7.45039	1.09926e-08	up	-6.14214	1.35407e-08	down
AL133216.2	ENSG00000276805	VCP SOD1 up	2.62227	0.000391681	up	1.22772	0.273272	non-significant	1.38467	0.0345823	up	-3.30964	8.9724e-21	down
RSPO3	ENSG00000146374	VCP SOD1 up	5.08395	0.000894064	up	3.9564	NA	non-significant	3.59132	0.000547508	up	-2.31518	0.000635069	down
AP000428.2	ENSG00000287289	VCP SOD1 up	3.24094	0.00442696	up	-0.715719	0.912256	non-significant	4.0951	0.0250729	up	-0.322234	0.821851	non-significant
SYTL5	ENSG00000147041	VCP SOD1 up	2.41439	0.00637293	up	-1.76658	0.022333	down	4.2279	5.80359e-10	up	-1.86849	2.11026e-05	down
TYRP1	ENSG00000107165	VCP SOD1 up	4.84387	0.0200317	up	1.18835	0.845869	non-significant	7.93828	1.09918e-08	up	-0.47851	0.817374	non-significant
OGN	ENSG00000106809	VCP SOD1 up	2.36995	0.0461715	up	2.2469	0.310646	non-significant	5.3334	2.62265e-14	up	-2.88983	0.00159755	down
SLC5A12	ENSG00000148942	VCP SOD1 up	2.70483	0.0466974	up	2.0558	0.392659	non-significant	4.12345	1.73143e-10	up	1.82652	0.063695	non-significant
DPP6	ENSG00000130226	VCP SOD1 down	-5.76543	0.000252045	down	-2.80169	0.478453	non-significant	-4.41699	7.79464e-08	down	2.20304	0.0739342	non-significant
ADRA1A	ENSG00000120907	VCP SOD1 down	-4.97344	0.00384596	down	-1.51876	NA	non-significant	-8.10984	9.20897e-11	down	-2.65651	NA	non-significant
LINC00648	ENSG00000259129	VCP SOD1 down	-3.61656	0.00618498	down	-0.177237	0.978162	non-significant	-1.89789	0.00611954	down	-2.1677	0.317632	non-significant
RCN1P2	ENSG00000214455	VCP SOD1 down	-2.13926	0.00712707	down	1.2466	0.675997	non-significant	-3.37184	0.000352474	down	-0.532669	0.0772821	non-significant
HLA-DQA1	ENSG00000196735	VCP SOD1 down	-4.28435	0.00874765	down	-1.16094	0.817347	non-significant	-2.21201	0.0450462	down	-1.6522	0.494463	non-significant
PLA2G3	ENSG00000100078	VCP SOD1 down	-5.07091	0.0139068	down	-0.988967	0.884775	non-significant	-5.7456	0.00355236	down	0.307211	0.89911	non-significant
SLC4A10	ENSG00000144290	VCP SOD1 down	-2.43134	0.0232714	down	-0.138465	0.975412	non-significant	-5.43944	3.24432e-05	down	-0.640525	0.611528	non-significant
ZFP3	ENSG00000180787	VCP SOD1 down	-1.86648	0.0297023	down	-0.578118	0.714133	non-significant	-5.23848	0.000315766	down	-1.02643	0.176741	non-significant
FSTL5	ENSG00000168843	VCP SOD1 down	-2.85664	0.044198	down	-2.01864	0.638274	non-significant	-1.60817	0.00830386	down	-0.822243	0.448798	non-significant
TBC1D3	ENSG00000274611	VCP FUS up	24.1753	0.00020783	up	0.742397	0.966548	non-significant	-7.42332	0.168547	non-significant	7.97691	1.41965e-09	up
DDIT4	ENSG00000168209	VCP FUS up	2.63834	0.000352166	up	-0.194105	0.953807	non-significant	-0.189543	0.81257	non-significant	0.732017	0.0143488	up
ADAMTS6	ENSG00000049192	VCP FUS up	3.26529	0.000398462	up	1.69736	0.170851	non-significant	-0.858768	0.366647	non-significant	1.77912	0.000209015	up
MSC	ENSG00000178860	VCP FUS up	4.85842	0.00162876	up	-0.00671946	0.998764	non-significant	NA	NA	non-significant	5.22127	2.27893e-12	up
BBOX1-AS1	ENSG00000254560	VCP FUS up	2.43126	0.00391452	up	2.71786	0.0949382	non-significant	1.56189	0.474306	non-significant	2.75233	0.0152311	up
KLHDC7B	ENSG00000130487	VCP FUS up	3.55139	0.0106018	up	1.5066	0.603366	non-significant	1.60864	NA	non-significant	3.8558	0.00119126	up
MSC-AS1	ENSG00000235531	VCP FUS up	4.05095	0.0122825	up	0.48681	0.912922	non-significant	1.90817	NA	non-significant	4.10607	3.55041e-12	up
TXNIP	ENSG00000265972	VCP FUS up	1.85626	0.0149697	up	0.910428	0.335247	non-significant	-2.17172	0.192298	non-significant	2.20137	1.23238e-08	up
SYTL4	ENSG00000102362	VCP FUS up	1.99394	0.0154382	up	-0.44712	0.797861	non-significant	-0.0734821	0.955585	non-significant	1.19722	0.025339	up
AMIGO2	ENSG00000139211	VCP FUS up	2.2625	0.0205569	up	1.67512	0.400586	non-significant	-2.525	3.22645e-05	down	1.59316	1.93264e-09	up
RARRES2	ENSG00000106538	VCP FUS up	5.47335	0.0301024	up	1.02992	0.850475	non-significant	-1.47039	0.501088	non-significant	2.40927	0.000627473	up
FAM66B	ENSG00000215374	VCP FUS up	3.12119	0.0450759	up	0.709576	0.776392	non-significant	1.57866	0.214579	non-significant	1.38266	0.00865877	up
PID1	ENSG00000153823	VCP FUS up	2.99966	0.0466974	up	0.211682	0.963489	non-significant	-4.4273	0.00687938	down	1.99191	4.96516e-05	up
AC026956.2	ENSG00000287872	VCP FUS up	3.77596	0.048119	up	0.715156	0.909272	non-significant	NA	NA	non-significant	3.16315	0.0165985	up
C5orf17	ENSG00000248874	VCP FUS down	-10.3722	1.85195e-06	down	1.7784	0.905387	non-significant	-1.31925	NA	non-significant	-5.11933	1.75336e-05	down
RN7SL2	ENSG00000274012	VCP FUS down	-2.07079	0.000528112	down	-0.162177	0.930821	non-significant	-3.25683	0.434822	non-significant	-1.18295	0.000181755	down
ABCA13	ENSG00000179869	VCP FUS down	-2.39576	0.00162876	down	-0.811751	0.860858	non-significant	-0.57918	0.745559	non-significant	-2.57827	0.00125378	down
LIX1	ENSG00000145721	VCP FUS down	-4.22213	0.00300969	down	0.700328	0.441384	non-significant	-0.140638	0.856011	non-significant	-1.29245	0.00800633	down
IFITM1	ENSG00000185885	VCP FUS down	-2.06709	0.00312106	down	-1.53833	0.646556	non-significant	2.35567	0.00043528	up	-2.60204	1.98315e-05	down
CNTNAP2	ENSG00000174469	VCP FUS down	-6.3057	0.0043857	down	-2.22737	0.75971	non-significant	-0.807554	0.0995201	non-significant	-1.45401	0.0296998	down
CRIP1	ENSG00000213145	VCP FUS down	-2.01903	0.00846994	down	1.37001	0.0596508	non-significant	2.0994	0.124752	non-significant	-1.3131	0.0233637	down
ADRB2	ENSG00000169252	VCP FUS down	-5.52659	0.0100923	down	3.65184	0.117628	non-significant	1.72216	0.412777	non-significant	-3.1565	1.75443e-05	down
FAM135B	ENSG00000147724	VCP FUS down	-12.6162	0.0149779	down	-0.453758	0.950195	non-significant	1.60704	0.583477	non-significant	-7.10904	7.42457e-08	down
PRLR	ENSG00000113494	VCP FUS down	-4.24747	0.0166345	down	1.5281	0.335247	non-significant	2.87182	0.0461065	up	-3.55005	1.84133e-08	down
AC006453.3	ENSG00000283196	VCP FUS down	-2.93852	0.0179161	down	1.29979	0.102631	non-significant	0.154552	0.825402	non-significant	-1.21553	3.79216e-06	down
COL26A1	ENSG00000160963	VCP FUS down	-2.28165	0.0242404	down	-0.175237	0.961022	non-significant	0.758339	0.133298	non-significant	-2.99914	1.12659e-07	down
SGPP2	ENSG00000163082	VCP FUS down	-2.07191	0.0256528	down	-3.23106	0.0511262	non-significant	2.70296	3.59014e-17	up	-1.89361	0.0244037	down
PTPRT	ENSG00000196090	VCP FUS down	-5.40129	0.0268294	down	0.645421	NA	non-significant	-3.0526	0.332596	non-significant	-4.96658	9.07396e-06	down
ACOX2	ENSG00000168306	VCP FUS down	-2.06657	0.0271349	down	1.13148	0.467612	non-significant	1.50578	0.00159412	up	-1.10459	0.00265787	down
PLCE1-AS1	ENSG00000268894	VCP FUS down	-4.6273	0.0357738	down	2.62816	0.0177336	up	0.740473	NA	non-significant	-2.32434	0.00273149	down
CXCL14	ENSG00000145824	C9orf72 SOD1 up	-1.32796	0.0847717	non-significant	1.44031	0.0245022	up	3.58257	3.10457e-06	up	0.848851	0.350957	non-significant
RNASE4	ENSG00000258818	C9orf72 SOD1 up	2.09164	0.0927015	non-significant	4.83451	8.46514e-06	up	1.36739	0.0133282	up	0.420272	0.702296	non-significant
NNMT	ENSG00000166741	C9orf72 SOD1 up	2.51419	0.185412	non-significant	2.61175	0.00903475	up	2.64953	1.69566e-07	up	0.166944	0.789699	non-significant
HEPH	ENSG00000089472	C9orf72 SOD1 up	2.06062	0.18713	non-significant	3.19533	0.0164629	up	3.45548	1.13039e-29	up	-0.966216	0.0950413	non-significant
MMP11	ENSG00000099953	C9orf72 SOD1 up	1.57761	0.18713	non-significant	1.67569	0.0228487	up	2.03126	0.00871187	up	-0.422531	0.147473	non-significant
HMCN2	ENSG00000148357	C9orf72 SOD1 up	2.24631	0.229402	non-significant	2.83206	3.83323e-13	up	2.02511	0.00108593	up	1.98557	0.122882	non-significant
SLC12A8	ENSG00000221955	C9orf72 SOD1 up	1.50537	0.252907	non-significant	1.84574	0.00497718	up	2.67172	6.98243e-05	up	-0.297919	0.533136	non-significant
TGFB3	ENSG00000119699	C9orf72 SOD1 up	-1.85273	0.288991	non-significant	2.52358	0.0123842	up	2.45107	0.000399678	up	-0.622047	0.287317	non-significant
HOGA1	ENSG00000241935	C9orf72 SOD1 up	-2.4122	0.312016	non-significant	1.955	0.0208388	up	1.94561	0.00468764	up	-1.18871	0.171003	non-significant
MFAP2	ENSG00000117122	C9orf72 SOD1 up	1.7022	0.339378	non-significant	2.6543	0.0306825	up	2.48547	0.0102619	up	-0.696379	0.00265913	down
ACTG2	ENSG00000163017	C9orf72 SOD1 up	2.27597	0.374348	non-significant	4.12394	3.73289e-12	up	4.03247	4.5982e-07	up	-0.250703	0.872872	non-significant
MARVELD3	ENSG00000140832	C9orf72 SOD1 up	-2.96085	0.390907	non-significant	2.18654	0.0030702	up	3.07808	0.00508923	up	-2.52389	4.68817e-05	down
SERPINE1	ENSG00000106366	C9orf72 SOD1 up	1.37254	0.423494	non-significant	2.92835	0.00628102	up	2.64908	4.824e-13	up	1.28404	0.232491	non-significant
SSPN	ENSG00000123096	C9orf72 SOD1 up	1.37354	0.449168	non-significant	1.84852	0.00220434	up	0.87498	0.0423348	up	-1.09339	0.000352396	down
PLEKHG3	ENSG00000126822	C9orf72 SOD1 up	-1.01002	0.476149	non-significant	1.99	0.0479342	up	1.12702	0.00339586	up	0.222445	0.816582	non-significant
GALNT5	ENSG00000136542	C9orf72 SOD1 up	-1.87209	0.538343	non-significant	2.69982	7.29606e-07	up	8.0495	5.42631e-12	up	0.425639	0.565883	non-significant
AL731702.1	ENSG00000286389	C9orf72 SOD1 up	-1.45396	0.567499	non-significant	1.61498	0.0226251	up	1.93253	0.00330193	up	1.93007	0.0876058	non-significant
COL10A1	ENSG00000123500	C9orf72 SOD1 up	1.83575	0.658572	non-significant	3.53409	6.58087e-05	up	7.91642	8.01423e-07	up	0.899708	0.380775	non-significant
LUM	ENSG00000139329	C9orf72 SOD1 up	2.21674	0.698023	non-significant	3.50091	0.0487262	up	1.90607	1.41082e-06	up	-1.92008	9.00182e-10	down
COPZ2	ENSG00000005243	C9orf72 SOD1 up	1.72961	0.732939	non-significant	3.15526	5.37e-14	up	2.40732	0.000296147	up	0.369322	0.376875	non-significant
ACVR1	ENSG00000115170	C9orf72 SOD1 up	1.07984	0.806592	non-significant	1.58768	0.00699864	up	1.49081	0.000199037	up	0.296087	0.238684	non-significant
GDPD5	ENSG00000158555	C9orf72 SOD1 up	-1.65687	0.920461	non-significant	1.87281	4.09097e-06	up	1.97912	3.42182e-07	up	-0.774892	0.225247	non-significant
DCN	ENSG00000011465	C9orf72 SOD1 up	2.18098	0.924188	non-significant	4.84289	1.58836e-11	up	2.18162	2.12517e-07	up	-1.99813	0.000168329	down
KRT15	ENSG00000171346	C9orf72 SOD1 up	-2.54171	0.980902	non-significant	3.29816	0.00427119	up	6.34045	0.000425408	up	0.44718	NA	non-significant
HFE	ENSG00000010704	C9orf72 SOD1 up	0.389944	0.999968	non-significant	2.18342	0.0159925	up	1.69527	0.0463439	up	0.310197	0.554368	non-significant
SNAI2	ENSG00000019549	C9orf72 SOD1 up	-0.363406	0.999968	non-significant	2.81869	0.000374719	up	2.131	0.0441857	up	0.027861	0.979179	non-significant
RAI14	ENSG00000039560	C9orf72 SOD1 up	0.497226	0.999968	non-significant	1.05249	0.0479342	up	1.13469	0.000724915	up	0.164544	0.728867	non-significant
STON1-GTF2A1L	ENSG00000068781	C9orf72 SOD1 up	-0.195226	0.999968	non-significant	2.55216	0.00151331	up	4.09347	2.63254e-13	up	-1.40149	0.520737	non-significant
MAST4	ENSG00000069020	C9orf72 SOD1 up	-0.459293	0.999968	non-significant	1.67329	0.00190166	up	0.801397	0.045248	up	0.257811	0.841023	non-significant
TXK	ENSG00000074966	C9orf72 SOD1 up	-0.987626	0.999968	non-significant	3.45954	0.0252624	up	4.09291	0.0431838	up	0.373766	0.894502	non-significant
IL4R	ENSG00000077238	C9orf72 SOD1 up	-1.04243	0.999968	non-significant	1.65354	0.000266531	up	3.62918	1.96618e-05	up	-1.08985	3.0784e-09	down
SLC25A43	ENSG00000077713	C9orf72 SOD1 up	-0.561995	0.999968	non-significant	1.42026	0.0031804	up	1.66682	3.19567e-05	up	-0.179636	0.587274	non-significant
LXN	ENSG00000079257	C9orf72 SOD1 up	-0.46897	0.999968	non-significant	4.16117	0.00189084	up	2.1154	0.00407503	up	-0.937466	0.189962	non-significant
PGM1	ENSG00000079739	C9orf72 SOD1 up	0.86213	0.999968	non-significant	1.59332	0.00435932	up	0.736052	0.048005	up	0.496454	0.0772406	non-significant
MID2	ENSG00000080561	C9orf72 SOD1 up	0.0937193	0.999968	non-significant	2.58252	0.000763207	up	1.77402	3.81233e-05	up	0.0921687	0.859843	non-significant
FAT2	ENSG00000086570	C9orf72 SOD1 up	0.503054	0.999968	non-significant	4.19333	0.0012914	up	9.50708	5.26181e-84	up	-1.57265	0.0925588	non-significant
CCDC80	ENSG00000091986	C9orf72 SOD1 up	0.254513	0.999968	non-significant	3.05333	9.67085e-08	up	2.01863	0.00105531	up	0.513365	0.357304	non-significant
DSP	ENSG00000096696	C9orf72 SOD1 up	-0.226527	0.999968	non-significant	7.21557	1.14661e-23	up	0.718554	0.035865	up	-0.290275	0.842206	non-significant
PCSK5	ENSG00000099139	C9orf72 SOD1 up	-0.404074	0.999968	non-significant	1.40983	0.00145511	up	1.64788	0.0319087	up	-0.306604	0.688044	non-significant
KDELR3	ENSG00000100196	C9orf72 SOD1 up	0.353875	0.999968	non-significant	2.40821	0.00049729	up	1.77369	0.0064482	up	0.46443	0.384381	non-significant
ABCD1	ENSG00000101986	C9orf72 SOD1 up	0.319552	0.999968	non-significant	1.49285	0.00759956	up	1.15216	0.0336771	up	-0.00740828	0.98646	non-significant
TIMP1	ENSG00000102265	C9orf72 SOD1 up	0.472394	0.999968	non-significant	1.67419	1.17412e-05	up	0.960211	0.00267599	up	-0.290065	0.638778	non-significant
KLHL4	ENSG00000102271	C9orf72 SOD1 up	1.42513	0.999968	non-significant	1.61884	0.000249204	up	1.31317	0.0238142	up	-0.985753	0.0598332	non-significant
SRPX2	ENSG00000102359	C9orf72 SOD1 up	1.27522	0.999968	non-significant	2.62044	0.000736301	up	2.78857	1.59559e-05	up	0.706427	0.0811968	non-significant
RGCC	ENSG00000102760	C9orf72 SOD1 up	0.711082	0.999968	non-significant	2.7402	0.00597741	up	5.19524	1.45469e-13	up	-0.937008	0.340942	non-significant
CRISPLD2	ENSG00000103196	C9orf72 SOD1 up	-0.186474	0.999968	non-significant	2.64946	0.00344347	up	3.46407	1.594e-17	up	-0.710128	0.322224	non-significant
CAV1	ENSG00000105974	C9orf72 SOD1 up	0.861103	0.999968	non-significant	1.13799	0.0359134	up	1.66268	1.64875e-07	up	-0.896146	0.356346	non-significant
AHR	ENSG00000106546	C9orf72 SOD1 up	0.121153	0.999968	non-significant	2.16528	0.000331015	up	3.548	1.27292e-34	up	-0.296891	0.321634	non-significant
CPZ	ENSG00000109625	C9orf72 SOD1 up	0.546446	0.999968	non-significant	3.7925	0.00592126	up	6.63471	3.0212e-09	up	-0.190411	0.625352	non-significant
PERP	ENSG00000112378	C9orf72 SOD1 up	0.0278866	0.999968	non-significant	3.05676	7.45258e-07	up	1.38121	9.23254e-05	up	-0.281949	0.381896	non-significant
ARSB	ENSG00000113273	C9orf72 SOD1 up	0.00398094	0.999968	non-significant	1.40894	0.00143024	up	1.19503	0.00511425	up	0.022002	0.957225	non-significant
TNNC1	ENSG00000114854	C9orf72 SOD1 up	-1.11724	0.999968	non-significant	1.46449	0.00785476	up	4.18565	6.21547e-06	up	1.05356	0.0705725	non-significant
EFHD1	ENSG00000115468	C9orf72 SOD1 up	-0.339933	0.999968	non-significant	1.50055	0.00290925	up	1.04608	0.000905799	up	-0.328069	0.562988	non-significant
OLFML3	ENSG00000116774	C9orf72 SOD1 up	1.00385	0.999968	non-significant	2.5307	7.36958e-08	up	5.957	4.77627e-15	up	-1.46543	0.000276945	down
TNNT2	ENSG00000118194	C9orf72 SOD1 up	-0.240022	0.999968	non-significant	3.17767	0.00227334	up	7.24715	3.81699e-08	up	0.196165	0.847484	non-significant
RAB32	ENSG00000118508	C9orf72 SOD1 up	1.07715	0.999968	non-significant	2.64071	0.00177293	up	1.47005	0.00206125	up	-0.12737	0.825355	non-significant
PLXDC2	ENSG00000120594	C9orf72 SOD1 up	0.83375	0.999968	non-significant	1.24863	0.0134203	up	1.17955	0.000576532	up	0.497534	0.244054	non-significant
GLT8D2	ENSG00000120820	C9orf72 SOD1 up	0.908085	0.999968	non-significant	3.58348	1.81582e-11	up	1.84343	5.1887e-05	up	-0.764794	0.0529198	non-significant
ANXA11	ENSG00000122359	C9orf72 SOD1 up	0.121469	0.999968	non-significant	2.15332	0.0114307	up	1.41247	1.72935e-06	up	-0.472218	0.00838425	down
BICC1	ENSG00000122870	C9orf72 SOD1 up	0.0623344	0.999968	non-significant	2.08231	0.0247702	up	1.5217	4.35667e-09	up	-0.0696494	0.891972	non-significant
AHNAK	ENSG00000124942	C9orf72 SOD1 up	-0.307865	0.999968	non-significant	1.09476	0.0190855	up	0.871159	0.0161174	up	-0.211103	0.752379	non-significant
PAX8	ENSG00000125618	C9orf72 SOD1 up	-0.223135	0.999968	non-significant	2.74838	0.0488593	up	4.01291	0.00178988	up	0.506891	0.816555	non-significant
BFSP1	ENSG00000125864	C9orf72 SOD1 up	0.639955	0.999968	non-significant	1.98814	0.0438819	up	1.87553	0.0133399	up	-0.01674	0.983014	non-significant
GDF5	ENSG00000125965	C9orf72 SOD1 up	-0.92476	0.999968	non-significant	2.37243	6.26402e-05	up	3.81709	2.72743e-05	up	0.81167	0.218195	non-significant
SLC44A2	ENSG00000129353	C9orf72 SOD1 up	0.103773	0.999968	non-significant	1.36186	0.0146688	up	1.00049	0.0367685	up	-0.605429	0.0392025	down
ASS1	ENSG00000130707	C9orf72 SOD1 up	0.326304	0.999968	non-significant	3.62244	1.32248e-12	up	4.64647	6.6384e-14	up	-0.0884206	0.919141	non-significant
TMTC1	ENSG00000133687	C9orf72 SOD1 up	-0.458888	0.999968	non-significant	2.06846	0.000497804	up	2.31886	8.41522e-16	up	-0.60101	0.379583	non-significant
COL4A2	ENSG00000134871	C9orf72 SOD1 up	0.236013	0.999968	non-significant	1.75585	0.000389246	up	2.01658	2.59493e-14	up	0.411245	0.603977	non-significant
KIAA1614	ENSG00000135835	C9orf72 SOD1 up	-0.10328	0.999968	non-significant	2.27229	0.00164035	up	3.53595	9.873e-07	up	-0.8173	0.300783	non-significant
TMBIM1	ENSG00000135926	C9orf72 SOD1 up	0.323002	0.999968	non-significant	1.15616	0.0158432	up	2.25987	8.67839e-06	up	-0.0977598	0.924479	non-significant
CKAP4	ENSG00000136026	C9orf72 SOD1 up	0.503833	0.999968	non-significant	1.24445	0.00324827	up	1.60027	2.36888e-17	up	0.108514	0.722498	non-significant
LMO7	ENSG00000136153	C9orf72 SOD1 up	0.604782	0.999968	non-significant	3.7525	1.54446e-11	up	1.78528	0.000175485	up	-0.417754	0.749673	non-significant
KDELR2	ENSG00000136240	C9orf72 SOD1 up	0.400396	0.999968	non-significant	1.22053	0.00703437	up	1.19527	5.73429e-07	up	0.295809	0.217647	non-significant
FRAS1	ENSG00000138759	C9orf72 SOD1 up	0.0769425	0.999968	non-significant	1.5389	0.0148107	up	1.04952	0.000857078	up	-3.35603	1.09972e-12	down
CACNA1A	ENSG00000141837	C9orf72 SOD1 up	0.0501472	0.999968	non-significant	2.00885	0.000814301	up	5.21988	3.04623e-20	up	-0.364499	0.692409	non-significant
RCN3	ENSG00000142552	C9orf72 SOD1 up	0.892054	0.999968	non-significant	3.06145	0.00169034	up	1.37388	0.00713131	up	0.83613	0.0963861	non-significant
HSPG2	ENSG00000142798	C9orf72 SOD1 up	0.607893	0.999968	non-significant	2.52853	5.38765e-08	up	1.63564	0.000385747	up	0.925219	0.212299	non-significant
STAC	ENSG00000144681	C9orf72 SOD1 up	-0.304639	0.999968	non-significant	3.13336	3.02867e-05	up	1.71321	0.00527796	up	1.43846	0.134627	non-significant
DAAM2	ENSG00000146122	C9orf72 SOD1 up	0.753928	0.999968	non-significant	3.72576	1.53442e-14	up	1.00057	0.0466824	up	0.3943	0.575162	non-significant
IGSF1	ENSG00000147255	C9orf72 SOD1 up	0.751079	0.999968	non-significant	1.28966	0.0160016	up	1.75074	0.00334768	up	-0.701249	0.298477	non-significant
PAMR1	ENSG00000149090	C9orf72 SOD1 up	0.240191	0.999968	non-significant	2.87275	0.00555976	up	3.66112	2.85593e-12	up	0.487055	0.334976	non-significant
TAGLN	ENSG00000149591	C9orf72 SOD1 up	0.620607	0.999968	non-significant	1.74243	0.0404685	up	3.65565	1.93698e-06	up	0.184579	0.842744	non-significant
CTF1	ENSG00000150281	C9orf72 SOD1 up	-0.209154	0.999968	non-significant	3.70802	1.7133e-06	up	1.62207	0.0195864	up	-0.203	0.64761	non-significant
EXT2	ENSG00000151348	C9orf72 SOD1 up	0.542876	0.999968	non-significant	1.09335	0.0274992	up	1.19031	0.00543832	up	0.00201355	0.995173	non-significant
DAB2	ENSG00000153071	C9orf72 SOD1 up	0.360778	0.999968	non-significant	2.73588	0.00301447	up	1.41479	0.0303341	up	0.369968	0.408472	non-significant
JAZF1	ENSG00000153814	C9orf72 SOD1 up	0.018125	0.999968	non-significant	1.514	0.000666903	up	1.44762	0.000545334	up	-0.365058	0.134089	non-significant
DKK2	ENSG00000155011	C9orf72 SOD1 up	-0.479627	0.999968	non-significant	6.10498	1.17591e-05	up	5.1311	3.87015e-10	up	-1.77002	0.0107527	down
GRAMD2B	ENSG00000155324	C9orf72 SOD1 up	-0.475452	0.999968	non-significant	2.45351	1.39348e-05	up	1.2857	0.00254471	up	-0.399087	0.522926	non-significant
LDLRAP1	ENSG00000157978	C9orf72 SOD1 up	0.258572	0.999968	non-significant	1.65102	0.00833572	up	1.24157	0.00346136	up	-0.615632	0.126266	non-significant
CSRP1	ENSG00000159176	C9orf72 SOD1 up	0.612944	0.999968	non-significant	1.73794	0.00174248	up	2.37834	0.00010384	up	0.0403385	0.964405	non-significant
ACE	ENSG00000159640	C9orf72 SOD1 up	0.567741	0.999968	non-significant	1.92657	0.014928	up	2.22958	0.00246286	up	-1.99074	0.00165689	down
NPR2	ENSG00000159899	C9orf72 SOD1 up	0.181261	0.999968	non-significant	1.76726	0.0439157	up	1.57467	0.00792251	up	0.110439	0.800944	non-significant
CYB561A3	ENSG00000162144	C9orf72 SOD1 up	0.551392	0.999968	non-significant	2.18265	7.96987e-05	up	1.59705	6.37127e-08	up	-0.165951	0.598576	non-significant
ITIH3	ENSG00000162267	C9orf72 SOD1 up	0.104934	0.999968	non-significant	4.87488	2.7887e-16	up	4.85468	0.00114515	up	-3.78791	3.18842e-05	down
FSTL1	ENSG00000163430	C9orf72 SOD1 up	-0.0887724	0.999968	non-significant	1.88655	5.88079e-05	up	1.17805	0.0419801	up	0.489475	0.346969	non-significant
LMOD1	ENSG00000163431	C9orf72 SOD1 up	1.19674	0.999968	non-significant	2.30084	0.0314281	up	2.89363	1.55394e-05	up	-0.671282	0.635058	non-significant
GPX8	ENSG00000164294	C9orf72 SOD1 up	0.560404	0.999968	non-significant	1.92971	0.00916969	up	1.96918	2.92658e-08	up	0.317763	0.232387	non-significant
COL1A2	ENSG00000164692	C9orf72 SOD1 up	0.318804	0.999968	non-significant	4.97411	3.10944e-21	up	9.11202	1.37022e-53	up	0.605994	0.0654982	non-significant
MYORG	ENSG00000164976	C9orf72 SOD1 up	0.0712433	0.999968	non-significant	2.03343	5.34953e-05	up	1.63628	9.55342e-07	up	0.357863	0.556101	non-significant
MAMDC2	ENSG00000165072	C9orf72 SOD1 up	-1.61794	0.999968	non-significant	4.13462	2.90258e-06	up	4.88503	4.6783e-25	up	0.50525	0.244777	non-significant
PKNOX2	ENSG00000165495	C9orf72 SOD1 up	-0.0127972	0.999968	non-significant	2.03473	5.52412e-05	up	0.564066	0.0347381	up	0.0296237	0.968943	non-significant
SLC39A13	ENSG00000165915	C9orf72 SOD1 up	0.740342	0.999968	non-significant	1.43722	0.0155752	up	1.17192	0.00587243	up	-0.112658	0.703628	non-significant
GPR176	ENSG00000166073	C9orf72 SOD1 up	0.137248	0.999968	non-significant	1.55023	0.0319401	up	1.81908	0.00114515	up	-0.0369344	0.972153	non-significant
MFAP4	ENSG00000166482	C9orf72 SOD1 up	-0.180459	0.999968	non-significant	3.46272	0.000219286	up	3.51709	6.5897e-13	up	0.651785	0.169209	non-significant
VKORC1	ENSG00000167397	C9orf72 SOD1 up	0.675793	0.999968	non-significant	1.58506	0.0160718	up	1.24362	0.0057205	up	0.267277	0.125856	non-significant
VASN	ENSG00000168140	C9orf72 SOD1 up	-0.665887	0.999968	non-significant	2.77166	6.31611e-08	up	2.75371	0.00128125	up	0.0123396	0.979973	non-significant
PPIC	ENSG00000168938	C9orf72 SOD1 up	0.360286	0.999968	non-significant	1.79658	0.0479702	up	2.92554	1.86414e-06	up	0.488952	0.249183	non-significant
COL8A2	ENSG00000171812	C9orf72 SOD1 up	0.984191	0.999968	non-significant	4.66738	3.28437e-26	up	4.08999	8.52453e-08	up	-0.0615695	0.920806	non-significant
PRNP	ENSG00000171867	C9orf72 SOD1 up	0.116312	0.999968	non-significant	1.522	0.00771844	up	0.988392	0.0418497	up	-0.392521	0.250253	non-significant
LAMB2	ENSG00000172037	C9orf72 SOD1 up	0.145839	0.999968	non-significant	1.32518	0.00918573	up	0.958243	0.00624372	up	-0.0247448	0.965231	non-significant
RARG	ENSG00000172819	C9orf72 SOD1 up	0.257442	0.999968	non-significant	1.25142	0.0175903	up	1.68816	0.000274794	up	-0.331107	0.458323	non-significant
ADGRG2	ENSG00000173698	C9orf72 SOD1 up	-1.44867	0.999968	non-significant	4.15731	2.65886e-06	up	7.87463	3.47031e-54	up	-1.59413	0.178283	non-significant
HEG1	ENSG00000173706	C9orf72 SOD1 up	0.0138126	0.999968	non-significant	2.14771	4.46583e-08	up	2.64281	1.77026e-05	up	-0.272071	0.694512	non-significant
ARL4D	ENSG00000175906	C9orf72 SOD1 up	1.20447	0.999968	non-significant	2.6769	3.28237e-05	up	4.56471	4.02321e-47	up	-0.870817	0.00137556	down
DENND2C	ENSG00000175984	C9orf72 SOD1 up	0.176044	0.999968	non-significant	1.88463	0.0097941	up	1.98121	0.00778111	up	-0.236506	0.783236	non-significant
TENM3-AS1	ENSG00000177822	C9orf72 SOD1 up	0.321295	0.999968	non-significant	2.03703	7.06947e-08	up	2.22885	1.87402e-15	up	0.380578	0.702978	non-significant
BET1L	ENSG00000177951	C9orf72 SOD1 up	0.240345	0.999968	non-significant	0.968978	0.0418206	up	0.798691	0.00891089	up	0.19077	0.208413	non-significant
MAGED1	ENSG00000179222	C9orf72 SOD1 up	-0.237957	0.999968	non-significant	1.03081	0.0227533	up	1.32513	3.31545e-08	up	-0.133649	0.45703	non-significant
NSUN7	ENSG00000179299	C9orf72 SOD1 up	-0.316074	0.999968	non-significant	1.83507	0.0481389	up	2.12284	0.000685369	up	-0.262684	0.805008	non-significant
ZNF154	ENSG00000179909	C9orf72 SOD1 up	-0.35753	0.999968	non-significant	1.46209	0.00201055	up	1.32195	0.0434539	up	0.224673	0.22632	non-significant
CREB3L2	ENSG00000182158	C9orf72 SOD1 up	0.363744	0.999968	non-significant	1.43752	0.011663	up	1.64669	1.57864e-07	up	0.163236	0.69061	non-significant
C1S	ENSG00000182326	C9orf72 SOD1 up	0.696676	0.999968	non-significant	2.46075	0.00109777	up	1.98987	2.16354e-14	up	-1.17089	4.35719e-11	down
BGN	ENSG00000182492	C9orf72 SOD1 up	1.09568	0.999968	non-significant	5.49027	2.48914e-07	up	2.56402	9.38192e-12	up	0.163849	0.901465	non-significant
ANXA2	ENSG00000182718	C9orf72 SOD1 up	0.0719759	0.999968	non-significant	2.72764	3.65823e-07	up	1.19538	3.9595e-05	up	0.482173	0.325639	non-significant
GPR1	ENSG00000183671	C9orf72 SOD1 up	1.5659	0.999968	non-significant	2.55647	0.0178829	up	1.82514	0.0142659	up	0.940921	0.179037	non-significant
RNLS	ENSG00000184719	C9orf72 SOD1 up	0.104901	0.999968	non-significant	3.27399	0.000189308	up	3.07974	0.0136934	up	0.457073	0.510824	non-significant
ARMCX2	ENSG00000184867	C9orf72 SOD1 up	0.0922835	0.999968	non-significant	2.17747	1.16328e-07	up	1.52674	0.018997	up	-0.210831	0.378772	non-significant
ROR1	ENSG00000185483	C9orf72 SOD1 up	1.09674	0.999968	non-significant	2.10717	0.0403452	up	3.29774	1.28745e-11	up	0.160694	0.831658	non-significant
CCDC190	ENSG00000185860	C9orf72 SOD1 up	-1.57714	0.999968	non-significant	2.9477	0.00820093	up	2.66307	0.00276734	up	-1.18444	0.488633	non-significant
GCNT1	ENSG00000187210	C9orf72 SOD1 up	-0.582943	0.999968	non-significant	2.49439	0.0166025	up	1.61776	0.017999	up	0.493388	0.504695	non-significant
COL4A1	ENSG00000187498	C9orf72 SOD1 up	0.255775	0.999968	non-significant	2.1823	0.00253462	up	2.33221	1.83365e-30	up	0.479111	0.615985	non-significant
LAMA2	ENSG00000196569	C9orf72 SOD1 up	0.653475	0.999968	non-significant	2.73168	0.0276491	up	4.26736	6.46196e-17	up	-0.32112	0.329922	non-significant
MFAP5	ENSG00000197614	C9orf72 SOD1 up	0.767439	0.999968	non-significant	3.92847	4.76222e-13	up	8.69197	3.88635e-29	up	1.12048	0.316269	non-significant
PARVA	ENSG00000197702	C9orf72 SOD1 up	0.696269	0.999968	non-significant	1.28328	0.00272459	up	1.24093	0.00716814	up	-0.153749	0.613763	non-significant
FAM114A1	ENSG00000197712	C9orf72 SOD1 up	0.675364	0.999968	non-significant	1.80246	0.0266674	up	1.78079	2.76544e-07	up	0.192642	0.616596	non-significant
MPZL1	ENSG00000197965	C9orf72 SOD1 up	0.432828	0.999968	non-significant	1.23161	0.0208777	up	1.09114	3.48363e-07	up	-0.103168	0.80943	non-significant
RASGEF1A	ENSG00000198915	C9orf72 SOD1 up	0.453951	0.999968	non-significant	2.41579	2.94983e-06	up	3.06213	0.000360167	up	0.586831	0.661241	non-significant
MEG3	ENSG00000214548	C9orf72 SOD1 up	-0.327983	0.999968	non-significant	10.5096	0.0269045	up	8.2072	4.09384e-32	up	-0.441953	NA	non-significant
LINC02798	ENSG00000227082	C9orf72 SOD1 up	-0.0401494	0.999968	non-significant	2.02494	0.0120969	up	3.14207	1.86952e-05	up	0.0585811	0.957561	non-significant
HCG11	ENSG00000228223	C9orf72 SOD1 up	-0.508453	0.999968	non-significant	3.08676	6.22968e-08	up	1.79152	0.0388809	up	0.229198	0.589186	non-significant
MBNL1-AS1	ENSG00000229619	C9orf72 SOD1 up	0.714288	0.999968	non-significant	1.94356	0.0037762	up	1.50695	0.0243974	up	-0.244529	0.751781	non-significant
ANXA2P2	ENSG00000231991	C9orf72 SOD1 up	0.233239	0.999968	non-significant	2.99977	2.03659e-13	up	3.24093	0.000917612	up	0.194601	0.871918	non-significant
GOLGA8N	ENSG00000232653	C9orf72 SOD1 up	0.299771	0.999968	non-significant	3.93244	6.77968e-05	up	1.84777	0.000833062	up	-0.0329714	0.969247	non-significant
LINC00607	ENSG00000235770	C9orf72 SOD1 up	1.30554	0.999968	non-significant	5.30672	1.22768e-07	up	3.26609	0.00110864	up	-1.03399	0.0592623	non-significant
B3GNT9	ENSG00000237172	C9orf72 SOD1 up	0.673703	0.999968	non-significant	2.30294	0.000180517	up	2.01147	8.93398e-12	up	-0.285211	0.0882626	non-significant
TXNDC5	ENSG00000239264	C9orf72 SOD1 up	0.579492	0.999968	non-significant	1.24067	0.00192725	up	0.782936	0.00739284	up	0.117896	0.544557	non-significant
SCARF2	ENSG00000244486	C9orf72 SOD1 up	0.253539	0.999968	non-significant	1.02787	0.0226251	up	1.53901	0.00232163	up	0.134993	0.619689	non-significant
SNHG18	ENSG00000250786	C9orf72 SOD1 up	-0.54367	0.999968	non-significant	3.21398	0.00235643	up	2.7147	5.11811e-08	up	0.438128	0.148828	non-significant
LINC02506	ENSG00000251129	C9orf72 SOD1 up	3.71568	0.999968	non-significant	8.1734	1.1642e-05	up	5.82736	2.94167e-09	up	3.57125	0.0749432	non-significant
PCDHGB6	ENSG00000253305	C9orf72 SOD1 up	1.39165	0.999968	non-significant	1.23526	0.0391582	up	2.29873	1.52732e-09	up	-0.184937	0.686584	non-significant
CRYZL2P-SEC16B	ENSG00000254154	C9orf72 SOD1 up	-0.414904	0.999968	non-significant	3.33812	6.51333e-10	up	2.25468	0.00071727	up	-0.275817	0.777671	non-significant
LINC02388	ENSG00000257259	C9orf72 SOD1 up	-0.317018	0.999968	non-significant	2.89998	0.00190974	up	3.43695	0.00740272	up	1.0625	0.606567	non-significant
DNM1P47	ENSG00000259660	C9orf72 SOD1 up	-0.259807	0.999968	non-significant	1.3341	0.0266112	up	1.41651	0.0135704	up	1.97977	0.0507611	non-significant
LINC02256	ENSG00000261064	C9orf72 SOD1 up	0.919036	0.999968	non-significant	2.72334	0.000280986	up	2.81618	0.0425036	up	-0.0607062	0.961247	non-significant
AC093535.2	ENSG00000279118	C9orf72 SOD1 up	-0.209092	0.999968	non-significant	2.4699	0.00559033	up	2.01198	0.000584873	up	-0.306655	0.692187	non-significant
AC019117.4	ENSG00000283321	C9orf72 SOD1 up	1.68526	0.999968	non-significant	3.98805	7.72877e-05	up	8.14821	3.48816e-09	up	0.256802	0.924713	non-significant
AC002074.1	ENSG00000285090	C9orf72 SOD1 up	1.85359	0.999968	non-significant	2.31567	0.00135556	up	4.66014	0.00698941	up	-4.04669	0.000168729	down
LINC01929	ENSG00000267013	C9orf72 SOD1 up	0.274297	NA	non-significant	4.94034	0.00318744	up	5.58469	0.0148545	up	1.50806	0.365539	non-significant
TACR1	ENSG00000115353	C9orf72 SOD1 down	2.88504	0.000628864	up	-4.84621	0.0196864	down	-5.12465	1.36501e-09	down	0.130678	0.952155	non-significant
GPR179	ENSG00000277399	C9orf72 SOD1 down	2.19815	0.0461715	up	-3.94154	0.00190838	down	-3.6323	0.0233877	down	-1.02845	0.713098	non-significant
MYO7A	ENSG00000137474	C9orf72 SOD1 down	1.96767	0.063371	non-significant	-3.45678	7.31591e-05	down	-3.53753	0.000309854	down	1.40676	0.525722	non-significant
CACNA1E	ENSG00000198216	C9orf72 SOD1 down	-2.32082	0.063371	non-significant	-4.38864	0.00288889	down	-4.98759	4.74408e-18	down	-0.949631	0.40085	non-significant
CNTN2	ENSG00000184144	C9orf72 SOD1 down	-3.14886	0.0905648	non-significant	-3.30511	0.0143636	down	-4.23445	0.0116284	down	-1.78604	0.260101	non-significant
GDA	ENSG00000119125	C9orf72 SOD1 down	-4.03905	0.107074	non-significant	-2.4614	0.0489629	down	-1.84722	9.21688e-09	down	-2.16764	0.163745	non-significant
GABRG3	ENSG00000182256	C9orf72 SOD1 down	1.72277	0.126205	non-significant	-2.91161	2.1699e-05	down	-3.61081	2.89279e-05	down	0.251417	0.83313	non-significant
BRINP3	ENSG00000162670	C9orf72 SOD1 down	-4.66509	0.229402	non-significant	-7.41467	3.04303e-12	down	-4.64108	0.01182	down	0.389675	0.909144	non-significant
BBOX1	ENSG00000129151	C9orf72 SOD1 down	-2.17616	0.241519	non-significant	-2.89451	0.00533049	down	-1.00492	0.0452811	down	0.55124	0.489186	non-significant
AC004540.2	ENSG00000225792	C9orf72 SOD1 down	-2.05113	0.294425	non-significant	-5.40654	0.000202547	down	-2.55785	0.0187221	down	-0.56109	NA	non-significant
MIR124-2HG	ENSG00000254377	C9orf72 SOD1 down	-3.39862	0.309906	non-significant	-6.44146	3.76318e-05	down	-5.41489	1.21573e-07	down	1.4105	0.564116	non-significant
SLITRK2	ENSG00000185985	C9orf72 SOD1 down	-2.62521	0.379124	non-significant	-4.08411	3.86011e-05	down	-8.32356	4.5279e-07	down	-0.187373	0.865339	non-significant
AL391807.1	ENSG00000230910	C9orf72 SOD1 down	-1.43056	0.390907	non-significant	-3.78451	0.000227798	down	-3.11896	3.73851e-11	down	-0.943045	0.349312	non-significant
STMN2	ENSG00000104435	C9orf72 SOD1 down	-1.49932	0.396174	non-significant	-6.90513	0.0289264	down	-6.93175	1.83402e-46	down	-1.80743	0.142131	non-significant
SCN9A	ENSG00000169432	C9orf72 SOD1 down	1.3283	0.42039	non-significant	-1.71466	0.0420416	down	-3.47791	1.57339e-14	down	0.969073	0.0677447	non-significant
CHRM3	ENSG00000133019	C9orf72 SOD1 down	1.08259	0.459281	non-significant	-3.28477	0.0031804	down	-3.19345	1.82302e-05	down	3.07423	1.51321e-07	up
CACNA1I	ENSG00000100346	C9orf72 SOD1 down	1.59276	0.512848	non-significant	-5.6219	0.012264	down	-1.80947	0.0460462	down	-2.01877	0.0691139	non-significant
SLC17A8	ENSG00000179520	C9orf72 SOD1 down	-1.77399	0.522089	non-significant	-6.09633	8.74014e-11	down	-5.05224	1.97769e-09	down	3.14297	0.00314827	up
CDHR1	ENSG00000148600	C9orf72 SOD1 down	-1.85407	0.531496	non-significant	-2.93534	0.022333	down	-5.86478	1.26396e-12	down	4.09962	4.08787e-05	up
HYDIN	ENSG00000157423	C9orf72 SOD1 down	-1.90012	0.590042	non-significant	-1.71683	0.0463187	down	-1.10266	0.0171501	down	-0.83794	0.386813	non-significant
ABCC8	ENSG00000006071	C9orf72 SOD1 down	2.50837	0.600626	non-significant	-4.29896	0.00142907	down	-4.40543	0.00175973	down	-2.58282	NA	non-significant
CFAP100	ENSG00000163885	C9orf72 SOD1 down	-3.52549	0.610083	non-significant	-3.68379	0.00656091	down	-1.22517	0.0336648	down	-0.441953	NA	non-significant
HEPACAM	ENSG00000165478	C9orf72 SOD1 down	-3.0778	0.627025	non-significant	-3.05414	0.00170317	down	-2.79483	0.0241624	down	-1.53938	NA	non-significant
LHFPL3	ENSG00000187416	C9orf72 SOD1 down	1.27399	0.631134	non-significant	-3.21631	0.0313493	down	-5.59515	8.84272e-08	down	-1.08519	0.605999	non-significant
MAPK4	ENSG00000141639	C9orf72 SOD1 down	-2.00918	0.632384	non-significant	-1.81352	0.0265573	down	-2.34762	2.08133e-08	down	-0.568309	0.533941	non-significant
F3	ENSG00000117525	C9orf72 SOD1 down	-1.00393	0.632466	non-significant	-1.47215	0.00653247	down	-1.36342	0.000151023	down	-0.99392	0.144511	non-significant
ADGRV1	ENSG00000164199	C9orf72 SOD1 down	-1.28988	0.651224	non-significant	-4.44483	8.08845e-07	down	-1.39181	4.86217e-05	down	1.26744	0.0348414	up
SOX11	ENSG00000176887	C9orf72 SOD1 down	-1.74341	0.761399	non-significant	-2.18178	0.00112925	down	-2.63202	9.30802e-07	down	-0.184159	0.722254	non-significant
SCN1A	ENSG00000144285	C9orf72 SOD1 down	-1.65275	0.783978	non-significant	-5.14147	1.95361e-05	down	-1.65837	4.98847e-06	down	-0.0116929	0.99602	non-significant
COCH	ENSG00000100473	C9orf72 SOD1 down	0.975865	0.812725	non-significant	-2.73095	0.0097941	down	-1.61192	0.0129561	down	3.1081	3.13815e-07	up
SEPTIN3	ENSG00000100167	C9orf72 SOD1 down	-1.30153	0.820158	non-significant	-1.84699	0.0172696	down	-1.22708	0.000802637	down	-1.00991	0.215954	non-significant
ADGRB3	ENSG00000135298	C9orf72 SOD1 down	-1.29641	0.893188	non-significant	-3.11808	0.000110373	down	-3.50022	4.87597e-26	down	-1.25501	0.105995	non-significant
FBN3	ENSG00000142449	C9orf72 SOD1 down	-1.97936	0.895824	non-significant	-3.37541	0.0244752	down	-5.99331	2.07621e-20	down	1.30011	0.350184	non-significant
NRXN3	ENSG00000021645	C9orf72 SOD1 down	-1.54416	0.905705	non-significant	-2.32921	0.0318476	down	-5.32205	8.60203e-08	down	0.300394	0.594484	non-significant
JPH4	ENSG00000092051	C9orf72 SOD1 down	0.786006	0.940409	non-significant	-3.22117	2.88712e-09	down	-2.82383	7.2795e-25	down	-1.3342	0.0949292	non-significant
AC004540.1	ENSG00000214870	C9orf72 SOD1 down	-1.3003	0.964779	non-significant	-2.56131	0.00229853	down	-1.51628	0.0126294	down	-0.511278	0.703568	non-significant
MTMR7	ENSG00000003987	C9orf72 SOD1 down	-0.619583	0.999968	non-significant	-4.44572	0.00552859	down	-8.33501	1.67617e-09	down	1.70394	0.394242	non-significant
SLC7A2	ENSG00000003989	C9orf72 SOD1 down	0.768735	0.999968	non-significant	-4.16577	0.00467363	down	-3.51736	3.84648e-12	down	-0.598603	0.508324	non-significant
THSD7A	ENSG00000005108	C9orf72 SOD1 down	0.561705	0.999968	non-significant	-4.59909	1.34574e-11	down	-4.7726	3.58599e-07	down	-1.19692	0.240389	non-significant
PRKAR2B	ENSG00000005249	C9orf72 SOD1 down	-0.692916	0.999968	non-significant	-1.73859	0.0226251	down	-1.74869	4.87138e-05	down	-0.929343	0.17508	non-significant
SOX8	ENSG00000005513	C9orf72 SOD1 down	0.364052	0.999968	non-significant	-3.85661	0.000284759	down	-1.26825	0.0228569	down	1.96343	0.00286775	up
ADAM22	ENSG00000008277	C9orf72 SOD1 down	-0.450676	0.999968	non-significant	-2.67221	2.80158e-06	down	-2.39313	1.53428e-07	down	0.249916	0.819005	non-significant
STMN4	ENSG00000015592	C9orf72 SOD1 down	-0.413602	0.999968	non-significant	-3.78442	1.06693e-06	down	-4.53227	2.01821e-50	down	-0.0614224	0.982009	non-significant
SYT13	ENSG00000019505	C9orf72 SOD1 down	-0.85417	0.999968	non-significant	-5.00286	4.96336e-11	down	-5.31905	7.32104e-19	down	-1.44085	0.096509	non-significant
MYO16	ENSG00000041515	C9orf72 SOD1 down	-1.14474	0.999968	non-significant	-2.67651	3.14652e-06	down	-2.07589	2.15179e-05	down	-1.07542	0.0912519	non-significant
NNAT	ENSG00000053438	C9orf72 SOD1 down	-1.91942	0.999968	non-significant	-4.16696	1.40281e-08	down	-8.81001	0.000264938	down	0.519832	NA	non-significant
KCNH2	ENSG00000055118	C9orf72 SOD1 down	0.137261	0.999968	non-significant	-2.94531	0.0371299	down	-2.18621	1.14708e-06	down	0.788412	0.109985	non-significant
PSD	ENSG00000059915	C9orf72 SOD1 down	0.286208	0.999968	non-significant	-2.45734	9.46494e-05	down	-2.36578	1.7772e-09	down	-0.474715	0.382502	non-significant
KIF26A	ENSG00000066735	C9orf72 SOD1 down	-0.252226	0.999968	non-significant	-2.95633	0.00418488	down	-4.33664	0.000337498	down	-1.40714	0.0662656	non-significant
REEP1	ENSG00000068615	C9orf72 SOD1 down	-0.14664	0.999968	non-significant	-1.86785	0.000620718	down	-2.27117	1.38001e-05	down	0.398026	0.57418	non-significant
KCNQ2	ENSG00000075043	C9orf72 SOD1 down	0.540894	0.999968	non-significant	-4.92859	5.5934e-11	down	-5.35077	2.85319e-05	down	-0.747721	0.702978	non-significant
CACNG4	ENSG00000075461	C9orf72 SOD1 down	-0.509761	0.999968	non-significant	-2.52473	9.61549e-10	down	-1.06352	0.0367952	down	-1.19077	0.131046	non-significant
TPD52	ENSG00000076554	C9orf72 SOD1 down	0.737061	0.999968	non-significant	-1.63355	0.0452209	down	-2.24428	5.05513e-06	down	2.27977	0.000111954	up
ACTL6B	ENSG00000077080	C9orf72 SOD1 down	-0.346294	0.999968	non-significant	-5.44515	0.00252055	down	-4.91924	1.11051e-08	down	-0.909423	NA	non-significant
NKAIN1	ENSG00000084628	C9orf72 SOD1 down	0.20845	0.999968	non-significant	-2.5719	0.00114395	down	-3.91765	3.29628e-13	down	0.980268	0.406941	non-significant
IGSF9	ENSG00000085552	C9orf72 SOD1 down	-0.877029	0.999968	non-significant	-5.57189	0.00148612	down	-2.84638	2.57529e-07	down	-0.428357	0.702257	non-significant
CHGB	ENSG00000089199	C9orf72 SOD1 down	0.723685	0.999968	non-significant	-1.63869	0.0301216	down	-2.75347	1.79097e-13	down	-0.45291	0.613453	non-significant
DLL3	ENSG00000090932	C9orf72 SOD1 down	-0.00946676	0.999968	non-significant	-2.96793	0.00230123	down	-3.45582	0.00139322	down	0.519632	0.536935	non-significant
PITPNM3	ENSG00000091622	C9orf72 SOD1 down	0.179818	0.999968	non-significant	-1.11248	0.0484661	down	-1.74391	0.000153872	down	0.910035	0.00640001	up
CDC7	ENSG00000097046	C9orf72 SOD1 down	-0.288654	0.999968	non-significant	-2.49041	0.00416201	down	-1.12935	0.0400385	down	0.064183	0.947648	non-significant
SEZ6L	ENSG00000100095	C9orf72 SOD1 down	-0.440507	0.999968	non-significant	-3.32799	3.29981e-05	down	-4.55382	0.000105893	down	0.0762168	0.970344	non-significant
CHGA	ENSG00000100604	C9orf72 SOD1 down	0.331494	0.999968	non-significant	-3.71617	0.00128312	down	-5.19179	1.67617e-09	down	0.000395326	0.999844	non-significant
HRH3	ENSG00000101180	C9orf72 SOD1 down	0.447501	0.999968	non-significant	-7.51004	0.0135327	down	-5.06721	0.000342704	down	NA	NA	non-significant
NKAIN4	ENSG00000101198	C9orf72 SOD1 down	-0.488939	0.999968	non-significant	-3.63259	0.016433	down	-1.89435	0.000610118	down	-0.0696498	0.951785	non-significant
CHRNA4	ENSG00000101204	C9orf72 SOD1 down	-1.40019	0.999968	non-significant	-4.78305	0.0119048	down	-6.41408	1.59968e-11	down	0.0389407	NA	non-significant
PAK5	ENSG00000101349	C9orf72 SOD1 down	-0.878663	0.999968	non-significant	-3.64226	0.0144651	down	-6.05706	3.7482e-10	down	0.519838	NA	non-significant
SYP	ENSG00000102003	C9orf72 SOD1 down	0.000660851	0.999968	non-significant	-1.24224	0.0239806	down	-4.1543	8.41522e-16	down	0.344562	0.682806	non-significant
RENBP	ENSG00000102032	C9orf72 SOD1 down	-0.275212	0.999968	non-significant	-2.49369	0.000252331	down	-2.76871	0.000473246	down	-0.17083	0.931624	non-significant
FGF14	ENSG00000102466	C9orf72 SOD1 down	-0.763555	0.999968	non-significant	-5.17031	0.00295255	down	-7.23602	4.89778e-12	down	0.627115	0.75218	non-significant
CORO1A	ENSG00000102879	C9orf72 SOD1 down	-0.606952	0.999968	non-significant	-1.72698	0.00935292	down	-2.12298	0.00287981	down	-0.424199	0.371671	non-significant
SMPD3	ENSG00000103056	C9orf72 SOD1 down	-0.235387	0.999968	non-significant	-2.81889	0.0308262	down	-6.21547	1.04952e-20	down	-1.51585	0.39588	non-significant
TOX3	ENSG00000103460	C9orf72 SOD1 down	-1.31931	0.999968	non-significant	-5.8095	7.91929e-13	down	-4.06477	1.17924e-06	down	-0.156358	0.910217	non-significant
ACSBG1	ENSG00000103740	C9orf72 SOD1 down	-1.56168	0.999968	non-significant	-3.7931	0.0161986	down	-4.31175	1.72282e-13	down	0.348129	NA	non-significant
SCG3	ENSG00000104112	C9orf72 SOD1 down	0.065354	0.999968	non-significant	-3.4328	1.17412e-05	down	-4.85532	3.74523e-15	down	1.60423	0.0595964	non-significant
NEFM	ENSG00000104722	C9orf72 SOD1 down	0.331949	0.999968	non-significant	-3.54817	7.97935e-06	down	-6.13388	3.04732e-13	down	0.437224	0.496656	non-significant
TUBB4A	ENSG00000104833	C9orf72 SOD1 down	-0.122137	0.999968	non-significant	-4.00892	0.00559033	down	-5.2297	1.43468e-17	down	2.08367	0.00487663	up
NOVA2	ENSG00000104967	C9orf72 SOD1 down	-0.0395191	0.999968	non-significant	-1.68242	0.00515283	down	-1.11326	0.00407484	down	-1.21629	0.13824	non-significant
SHD	ENSG00000105251	C9orf72 SOD1 down	-0.594846	0.999968	non-significant	-2.38612	0.0330318	down	-3.9054	0.00374942	down	1.52629	0.277624	non-significant
ATP1A3	ENSG00000105409	C9orf72 SOD1 down	0.413793	0.999968	non-significant	-3.05188	0.0126869	down	-6.41046	5.56171e-07	down	3.53361	0.0054085	up
MAST1	ENSG00000105613	C9orf72 SOD1 down	-0.138367	0.999968	non-significant	-4.77837	6.4845e-15	down	-4.78406	4.26635e-30	down	0.311644	0.732523	non-significant
KCNN1	ENSG00000105642	C9orf72 SOD1 down	-0.938669	0.999968	non-significant	-2.52675	0.0156241	down	-6.00571	7.42364e-06	down	1.72725	0.21309	non-significant
NPTX2	ENSG00000106236	C9orf72 SOD1 down	0.531747	0.999968	non-significant	-2.08985	0.0174912	down	-1.19058	2.71654e-05	down	-0.775126	0.310966	non-significant
PTPRZ1	ENSG00000106278	C9orf72 SOD1 down	-0.863298	0.999968	non-significant	-2.65221	0.00395725	down	-1.78455	4.15028e-08	down	-0.54547	0.676583	non-significant
RUNDC3A	ENSG00000108309	C9orf72 SOD1 down	0.21325	0.999968	non-significant	-1.3122	0.0305582	down	-4.31987	4.42892e-15	down	0.999343	0.235822	non-significant
CRACD	ENSG00000109265	C9orf72 SOD1 down	0.0946439	0.999968	non-significant	-1.52181	0.000801032	down	-1.09938	0.000413694	down	0.269931	0.54422	non-significant
GCNT2	ENSG00000111846	C9orf72 SOD1 down	-0.385439	0.999968	non-significant	-1.74638	0.0109124	down	-3.44245	0.00010646	down	1.12216	0.300594	non-significant
ST8SIA4	ENSG00000113532	C9orf72 SOD1 down	0.212077	0.999968	non-significant	-4.62728	1.63074e-19	down	-1.70229	0.00935263	down	-0.092503	0.937887	non-significant
ACVR2B	ENSG00000114739	C9orf72 SOD1 down	-0.531791	0.999968	non-significant	-2.39026	0.0448813	down	-1.95701	0.00600053	down	-0.209606	0.711616	non-significant
KIF21B	ENSG00000116852	C9orf72 SOD1 down	-1.224	0.999968	non-significant	-3.04604	0.000143909	down	-5.51775	2.63525e-52	down	0.248961	0.719939	non-significant
HPCAL4	ENSG00000116983	C9orf72 SOD1 down	-0.151043	0.999968	non-significant	-3.8752	0.0070825	down	-5.99757	3.42029e-22	down	0.161229	0.942697	non-significant
STMN1	ENSG00000117632	C9orf72 SOD1 down	-0.52998	0.999968	non-significant	-1.62377	2.52462e-05	down	-0.89234	0.032769	down	-0.432197	0.0945341	non-significant
IQSEC3	ENSG00000120645	C9orf72 SOD1 down	0.633882	0.999968	non-significant	-5.08222	0.0233568	down	-7.81735	6.77748e-10	down	2.43391	0.40814	non-significant
MAPK8IP1	ENSG00000121653	C9orf72 SOD1 down	-0.346269	0.999968	non-significant	-1.69475	0.0477425	down	-0.933094	0.0493892	down	-0.337173	0.441031	non-significant
NXPH1	ENSG00000122584	C9orf72 SOD1 down	1.0797	0.999968	non-significant	-5.07965	0.00151153	down	-5.43204	5.84004e-07	down	-1.99102	NA	non-significant
PARD6B	ENSG00000124171	C9orf72 SOD1 down	-0.745602	0.999968	non-significant	-2.04757	0.04861	down	-1.07546	0.0386541	down	-0.35564	0.741183	non-significant
ATP8A1	ENSG00000124406	C9orf72 SOD1 down	-0.843726	0.999968	non-significant	-3.05495	0.00562685	down	-2.13738	8.5341e-05	down	-1.00868	0.189904	non-significant
NDP	ENSG00000124479	C9orf72 SOD1 down	-1.16444	0.999968	non-significant	-2.3003	0.000580609	down	-2.62546	2.16526e-06	down	-0.894385	0.140543	non-significant
C1orf61	ENSG00000125462	C9orf72 SOD1 down	-0.852361	0.999968	non-significant	-3.88867	0.00190671	down	-4.92749	6.89026e-46	down	2.56564	0.147221	non-significant
CITED1	ENSG00000125931	C9orf72 SOD1 down	0.501323	0.999968	non-significant	-5.33094	1.06425e-08	down	-3.8831	0.0102639	down	-0.386634	0.812669	non-significant
MCF2L	ENSG00000126217	C9orf72 SOD1 down	-0.82526	0.999968	non-significant	-3.10893	0.00155631	down	-4.35402	1.67943e-14	down	1.64088	0.0278187	up
TMEM35A	ENSG00000126950	C9orf72 SOD1 down	-0.742471	0.999968	non-significant	-1.96304	0.0131828	down	-2.37911	3.74523e-15	down	0.12021	0.859352	non-significant
HIP1	ENSG00000127946	C9orf72 SOD1 down	-0.213301	0.999968	non-significant	-1.41002	0.00229853	down	-0.653023	0.0210216	down	-0.180266	0.7437	non-significant
KCNC1	ENSG00000129159	C9orf72 SOD1 down	-0.442864	0.999968	non-significant	-3.33792	0.000966515	down	-2.9596	2.95082e-11	down	-1.65199	0.132173	non-significant
MTUS1	ENSG00000129422	C9orf72 SOD1 down	-0.912044	0.999968	non-significant	-4.75858	0.00502563	down	-1.51825	0.000172018	down	-0.334401	0.664877	non-significant
NCAN	ENSG00000130287	C9orf72 SOD1 down	0.14461	0.999968	non-significant	-4.61325	0.00501758	down	-6.80781	7.00062e-66	down	0.956839	0.532796	non-significant
KIF1A	ENSG00000130294	C9orf72 SOD1 down	-0.714229	0.999968	non-significant	-2.04933	0.0127423	down	-2.74222	1.22442e-20	down	0.428395	0.734938	non-significant
FCHO1	ENSG00000130475	C9orf72 SOD1 down	-0.272861	0.999968	non-significant	-2.14824	0.0412785	down	-3.78163	9.6034e-15	down	-0.932519	0.0630238	non-significant
GFAP	ENSG00000131095	C9orf72 SOD1 down	-1.77171	0.999968	non-significant	-1.69429	0.0440127	down	-1.3721	0.0180021	down	0.383667	0.776827	non-significant
GCH1	ENSG00000131979	C9orf72 SOD1 down	-0.0711952	0.999968	non-significant	-2.41684	3.3169e-05	down	-2.69815	0.0061931	down	-0.683362	0.163804	non-significant
ATP8A2	ENSG00000132932	C9orf72 SOD1 down	-0.343364	0.999968	non-significant	-2.24588	0.0135967	down	-5.48647	2.04449e-07	down	-0.269041	0.702279	non-significant
E2F5	ENSG00000133740	C9orf72 SOD1 down	-0.676503	0.999968	non-significant	-2.34333	0.0130248	down	-0.620124	0.0332342	down	-0.0604688	0.942406	non-significant
UNC79	ENSG00000133958	C9orf72 SOD1 down	0.282181	0.999968	non-significant	-1.95602	0.0467129	down	-4.43041	2.78919e-23	down	0.649138	0.483798	non-significant
GRHL1	ENSG00000134317	C9orf72 SOD1 down	-0.346632	0.999968	non-significant	-3.2471	0.00163959	down	-2.28209	0.00564249	down	-0.622553	0.458704	non-significant
CRB1	ENSG00000134376	C9orf72 SOD1 down	-1.35176	0.999968	non-significant	-3.79164	5.98316e-06	down	-1.8697	5.42463e-11	down	-1.00383	0.409702	non-significant
RAB33A	ENSG00000134594	C9orf72 SOD1 down	0.942771	0.999968	non-significant	-1.9003	0.00356119	down	-2.91783	0.000301425	down	0.776877	0.403833	non-significant
RGS8	ENSG00000135824	C9orf72 SOD1 down	1.33292	0.999968	non-significant	-3.2482	0.0140734	down	-0.976222	0.022066	down	-1.30657	0.568431	non-significant
PCDH8	ENSG00000136099	C9orf72 SOD1 down	-0.869421	0.999968	non-significant	-4.66789	0.0103445	down	-3.01279	1.30579e-06	down	2.11775	0.101513	non-significant
EDNRB	ENSG00000136160	C9orf72 SOD1 down	0.719098	0.999968	non-significant	-2.41823	0.00140203	down	-1.80307	2.81365e-05	down	0.126167	0.949562	non-significant
LMX1B	ENSG00000136944	C9orf72 SOD1 down	-0.0663498	0.999968	non-significant	-4.28712	0.0224288	down	-3.52139	1.29525e-08	down	-1.98778	0.319687	non-significant
TUBB2B	ENSG00000137285	C9orf72 SOD1 down	-0.227898	0.999968	non-significant	-1.15892	0.0366375	down	-1.22112	0.000332443	down	-0.352705	0.429054	non-significant
SLCO5A1	ENSG00000137571	C9orf72 SOD1 down	-1.48615	0.999968	non-significant	-2.10408	0.00238348	down	-3.14146	4.57301e-21	down	-0.0780625	0.97094	non-significant
SLC44A5	ENSG00000137968	C9orf72 SOD1 down	-0.710686	0.999968	non-significant	-2.9597	0.00167245	down	-1.65668	1.28696e-06	down	1.02442	0.0568538	non-significant
IDH1	ENSG00000138413	C9orf72 SOD1 down	0.065855	0.999968	non-significant	-2.00115	0.0306728	down	-1.07793	0.000588466	down	-0.412932	0.090929	non-significant
B4GALNT3	ENSG00000139044	C9orf72 SOD1 down	0.101744	0.999968	non-significant	-4.01819	0.000157034	down	-3.41344	0.000299031	down	2.50905	0.00143994	up
KIF21A	ENSG00000139116	C9orf72 SOD1 down	-0.198515	0.999968	non-significant	-2.46748	0.00713686	down	-1.5858	7.29185e-05	down	0.530811	0.234112	non-significant
ASCL1	ENSG00000139352	C9orf72 SOD1 down	-0.368105	0.999968	non-significant	-5.07578	8.65876e-07	down	-1.04224	0.000193254	down	2.45771	0.504468	non-significant
GAS2L3	ENSG00000139354	C9orf72 SOD1 down	-1.72098	0.999968	non-significant	-2.54964	0.0355626	down	-1.62058	0.041138	down	1.79841	0.00512291	up
FAM222A	ENSG00000139438	C9orf72 SOD1 down	-0.085906	0.999968	non-significant	-2.74119	0.000548167	down	-2.62812	1.78582e-07	down	-0.403164	0.251679	non-significant
NOVA1	ENSG00000139910	C9orf72 SOD1 down	0.234508	0.999968	non-significant	-2.27798	0.000666903	down	-4.36404	1.6041e-14	down	-0.643575	0.329208	non-significant
RHBDL3	ENSG00000141314	C9orf72 SOD1 down	0.275531	0.999968	non-significant	-3.36663	0.0009541	down	-2.95829	0.000938611	down	1.2308	0.200799	non-significant
ASXL3	ENSG00000141431	C9orf72 SOD1 down	-0.847577	0.999968	non-significant	-2.40427	0.00184245	down	-2.71002	3.80843e-12	down	-0.251032	0.672157	non-significant
RNF157	ENSG00000141576	C9orf72 SOD1 down	-0.542673	0.999968	non-significant	-2.24152	0.000262583	down	-1.97996	1.61277e-09	down	-0.423216	0.779157	non-significant
HUNK	ENSG00000142149	C9orf72 SOD1 down	-0.211761	0.999968	non-significant	-1.61323	0.00924414	down	-1.31193	0.0157338	down	-0.220206	0.830442	non-significant
TAGLN3	ENSG00000144834	C9orf72 SOD1 down	-0.676952	0.999968	non-significant	-2.37737	0.00216824	down	-1.41315	0.00209255	down	-1.06483	0.296478	non-significant
IGSF11	ENSG00000144847	C9orf72 SOD1 down	-1.12937	0.999968	non-significant	-2.031	0.0339604	down	-3.72221	2.30163e-08	down	3.08582	0.0793914	non-significant
LRRTM2	ENSG00000146006	C9orf72 SOD1 down	-0.599046	0.999968	non-significant	-1.55623	0.00233966	down	-3.99442	1.50708e-09	down	0.983122	0.380777	non-significant
FAXC	ENSG00000146267	C9orf72 SOD1 down	-0.375262	0.999968	non-significant	-2.01185	0.00144312	down	-1.76724	0.000412415	down	-0.250381	0.532918	non-significant
SNTG1	ENSG00000147481	C9orf72 SOD1 down	-1.10408	0.999968	non-significant	-4.60856	9.21699e-13	down	-4.86249	1.48841e-12	down	-0.263379	0.823012	non-significant
ST18	ENSG00000147488	C9orf72 SOD1 down	0.0870719	0.999968	non-significant	-5.89535	0.0308775	down	-7.78016	2.85319e-05	down	1.8718	0.500614	non-significant
PLPPR1	ENSG00000148123	C9orf72 SOD1 down	-0.192799	0.999968	non-significant	-2.69156	0.00353521	down	-5.23094	3.23835e-09	down	1.41372	0.205666	non-significant
NKX6-2	ENSG00000148826	C9orf72 SOD1 down	-0.685697	0.999968	non-significant	-6.73191	7.43172e-06	down	-3.84827	3.24317e-12	down	2.82164	0.000157695	up
CDH22	ENSG00000149654	C9orf72 SOD1 down	0.405259	0.999968	non-significant	-4.67495	0.00620562	down	-2.4371	1.7466e-06	down	-0.443215	NA	non-significant
DOC2A	ENSG00000149927	C9orf72 SOD1 down	0.117407	0.999968	non-significant	-3.41364	0.017678	down	-3.3777	9.59765e-05	down	1.27712	0.464823	non-significant
CNKSR2	ENSG00000149970	C9orf72 SOD1 down	0.285432	0.999968	non-significant	-2.30593	0.0294403	down	-0.941734	0.0370069	down	-0.714187	0.525093	non-significant
ADGRL3	ENSG00000150471	C9orf72 SOD1 down	-0.514329	0.999968	non-significant	-2.095	0.0258528	down	-1.62942	6.75273e-08	down	0.796802	0.00443868	up
GPM6A	ENSG00000150625	C9orf72 SOD1 down	-1.0205	0.999968	non-significant	-4.37879	8.05066e-11	down	-1.75693	0.00289804	down	0.601847	0.618852	non-significant
PTPRO	ENSG00000151490	C9orf72 SOD1 down	-1.12909	0.999968	non-significant	-3.43956	6.79025e-14	down	-1.7258	1.20415e-06	down	-0.0303069	0.977885	non-significant
PDE3B	ENSG00000152270	C9orf72 SOD1 down	-0.556056	0.999968	non-significant	-4.76731	1.6325e-07	down	-3.27449	0.000646531	down	-1.16077	0.262703	non-significant
GRIA4	ENSG00000152578	C9orf72 SOD1 down	0.44638	0.999968	non-significant	-4.9566	0.00101599	down	-6.13747	5.5857e-09	down	0.757446	0.496351	non-significant
FAM92B	ENSG00000153789	C9orf72 SOD1 down	-1.99183	0.999968	non-significant	-3.42633	0.011395	down	-1.84433	0.0452616	down	-2.14079	0.261409	non-significant
LGI4	ENSG00000153902	C9orf72 SOD1 down	-1.33809	0.999968	non-significant	-3.62421	0.0373333	down	-5.48045	0.001494	down	0.238116	0.916255	non-significant
WNT7A	ENSG00000154764	C9orf72 SOD1 down	-1.24954	0.999968	non-significant	-2.94548	0.000178382	down	-3.50556	2.25285e-07	down	-1.48856	0.261669	non-significant
ACSS1	ENSG00000154930	C9orf72 SOD1 down	-0.430388	0.999968	non-significant	-2.30011	6.86748e-06	down	-3.12927	0.00652198	down	-0.470207	0.595275	non-significant
CA10	ENSG00000154975	C9orf72 SOD1 down	0.0903989	0.999968	non-significant	-4.54453	0.0253341	down	-5.38624	0.0029452	down	-1.92396	0.107286	non-significant
CNTNAP5	ENSG00000155052	C9orf72 SOD1 down	-1.03823	0.999968	non-significant	-7.75379	0.0100424	down	-7.95877	3.38244e-08	down	0.379738	NA	non-significant
AGPAT5	ENSG00000155189	C9orf72 SOD1 down	-0.296069	0.999968	non-significant	-1.79528	0.0188526	down	-0.730483	0.0246505	down	-0.415153	0.288678	non-significant
KIF5A	ENSG00000155980	C9orf72 SOD1 down	-0.200327	0.999968	non-significant	-1.74669	0.00142112	down	-1.69232	1.80246e-17	down	-0.213865	0.82805	non-significant
MMP16	ENSG00000156103	C9orf72 SOD1 down	0.441671	0.999968	non-significant	-1.86711	0.000180179	down	-1.29657	3.00245e-05	down	-0.593659	0.479297	non-significant
SORCS3	ENSG00000156395	C9orf72 SOD1 down	0.659265	0.999968	non-significant	-3.44265	7.97103e-11	down	-3.42108	7.05623e-12	down	-1.23549	0.559738	non-significant
PPP2R2B	ENSG00000156475	C9orf72 SOD1 down	-0.193592	0.999968	non-significant	-2.85347	1.39686e-09	down	-0.826093	0.0486892	down	-0.917949	0.12078	non-significant
LHFPL4	ENSG00000156959	C9orf72 SOD1 down	-0.0732323	0.999968	non-significant	-4.70929	0.00868248	down	-8.71988	1.83507e-09	down	-1.71471	0.412997	non-significant
TMSB15A	ENSG00000158164	C9orf72 SOD1 down	-1.30936	0.999968	non-significant	-5.12086	4.46583e-08	down	-2.67654	5.13261e-07	down	-0.289625	0.783236	non-significant
H2BC5	ENSG00000158373	C9orf72 SOD1 down	0.452253	0.999968	non-significant	-2.03148	0.0407471	down	-2.16375	0.0031341	down	0.00897477	0.990437	non-significant
H4C8	ENSG00000158406	C9orf72 SOD1 down	1.03502	0.999968	non-significant	-1.40515	0.00118121	down	-2.63707	0.0380292	down	1.76719	0.000325152	up
VWA5B1	ENSG00000158816	C9orf72 SOD1 down	-1.15453	0.999968	non-significant	-3.40716	0.0135967	down	-2.31177	7.81832e-06	down	-2.26396	0.161788	non-significant
STARD9	ENSG00000159433	C9orf72 SOD1 down	0.096482	0.999968	non-significant	-1.20895	0.00702012	down	-0.936785	0.00277888	down	0.253078	0.5783	non-significant
CHRNB2	ENSG00000160716	C9orf72 SOD1 down	-0.136382	0.999968	non-significant	-3.76028	3.90545e-06	down	-5.0268	2.09199e-05	down	-1.04976	0.387956	non-significant
SH2B2	ENSG00000160999	C9orf72 SOD1 down	-0.0289047	0.999968	non-significant	-1.73778	0.00773365	down	-1.48115	0.0123037	down	-0.453824	0.487827	non-significant
CELF5	ENSG00000161082	C9orf72 SOD1 down	-0.480884	0.999968	non-significant	-2.59957	0.0213091	down	-6.63621	1.20295e-26	down	-0.396294	0.751836	non-significant
GNG3	ENSG00000162188	C9orf72 SOD1 down	0.104336	0.999968	non-significant	-1.84163	0.0167138	down	-3.2937	1.45164e-18	down	-0.81345	0.412764	non-significant
ELAVL4	ENSG00000162374	C9orf72 SOD1 down	0.0247222	0.999968	non-significant	-5.43566	7.63696e-10	down	-6.6153	4.62905e-07	down	-0.441953	NA	non-significant
WNT4	ENSG00000162552	C9orf72 SOD1 down	0.587424	0.999968	non-significant	-3.10513	0.00502563	down	-6.22276	1.44939e-15	down	-0.00806734	0.997035	non-significant
KCNJ9	ENSG00000162728	C9orf72 SOD1 down	-0.132791	0.999968	non-significant	-4.46529	0.00701422	down	-4.30281	2.11505e-08	down	-0.441009	NA	non-significant
CCDC138	ENSG00000163006	C9orf72 SOD1 down	-0.716475	0.999968	non-significant	-3.12359	0.00748575	down	-1.01567	0.036041	down	-0.163529	0.797903	non-significant
KBTBD8	ENSG00000163376	C9orf72 SOD1 down	-0.309733	0.999968	non-significant	-2.17395	0.0359134	down	-2.14292	0.0367305	down	0.280983	0.866615	non-significant
CAMKV	ENSG00000164076	C9orf72 SOD1 down	-0.391771	0.999968	non-significant	-4.76552	0.00155805	down	-2.90577	3.49347e-07	down	0.181958	0.905242	non-significant
GUCY1A1	ENSG00000164116	C9orf72 SOD1 down	-0.832628	0.999968	non-significant	-4.91678	5.51981e-18	down	-4.30422	2.68399e-09	down	0.576574	0.311212	non-significant
KIAA1958	ENSG00000165185	C9orf72 SOD1 down	-0.38109	0.999968	non-significant	-1.89346	0.0197385	down	-0.996229	0.00848609	down	-0.41878	0.575445	non-significant
PTCHD1	ENSG00000165186	C9orf72 SOD1 down	1.37284	0.999968	non-significant	-2.48095	0.00032466	down	-1.88642	0.000338796	down	0.375609	0.895864	non-significant
PHYHIPL	ENSG00000165443	C9orf72 SOD1 down	-0.66976	0.999968	non-significant	-3.31598	0.0257031	down	-4.10677	1.31015e-28	down	2.04919	0.0242419	up
SVOP	ENSG00000166111	C9orf72 SOD1 down	0.141995	0.999968	non-significant	-4.66667	0.0155487	down	-7.05769	8.82951e-14	down	1.44141	NA	non-significant
CKB	ENSG00000166165	C9orf72 SOD1 down	-0.930585	0.999968	non-significant	-2.08822	0.000274323	down	-1.6506	1.74701e-10	down	1.06123	0.000281863	up
LMO1	ENSG00000166407	C9orf72 SOD1 down	-0.672765	0.999968	non-significant	-4.63968	0.000517595	down	-3.12237	0.0219134	down	0.312038	0.870447	non-significant
CRABP1	ENSG00000166426	C9orf72 SOD1 down	0.685785	0.999968	non-significant	-7.86214	5.95654e-09	down	-4.74247	1.2426e-17	down	-2.02202	0.0610845	non-significant
TMPRSS5	ENSG00000166682	C9orf72 SOD1 down	-1.08302	0.999968	non-significant	-2.93644	0.0356156	down	-1.97377	0.00370156	down	0.422421	0.749832	non-significant
SGSM1	ENSG00000167037	C9orf72 SOD1 down	-0.316914	0.999968	non-significant	-4.82518	1.65664e-07	down	-4.19241	2.51258e-10	down	-1.52979	NA	non-significant
GPRC5B	ENSG00000167191	C9orf72 SOD1 down	-0.534681	0.999968	non-significant	-1.2133	0.0200399	down	-1.08736	1.7439e-05	down	0.160824	0.857543	non-significant
TTYH1	ENSG00000167614	C9orf72 SOD1 down	-0.381906	0.999968	non-significant	-2.39762	3.7749e-07	down	-3.28864	6.0868e-10	down	-1.18305	0.0603983	non-significant
ATCAY	ENSG00000167654	C9orf72 SOD1 down	-0.379258	0.999968	non-significant	-4.54577	6.90438e-05	down	-4.04244	1.65795e-21	down	-1.65611	0.0903659	non-significant
RCOR2	ENSG00000167771	C9orf72 SOD1 down	0.253648	0.999968	non-significant	-3.87424	0.00192725	down	-3.24768	0.000936693	down	0.0659279	0.956034	non-significant
MGAT5B	ENSG00000167889	C9orf72 SOD1 down	0.904233	0.999968	non-significant	-1.6855	0.000860185	down	-2.72295	3.63794e-12	down	-0.672998	0.109121	non-significant
KIF5C	ENSG00000168280	C9orf72 SOD1 down	-0.583917	0.999968	non-significant	-3.01375	0.00515283	down	-1.81528	7.01152e-22	down	-1.475	0.0694085	non-significant
VXN	ENSG00000169085	C9orf72 SOD1 down	0.122488	0.999968	non-significant	-1.98232	4.65151e-05	down	-3.08047	0.0174295	down	2.87949	0.000162168	up
PKIA	ENSG00000171033	C9orf72 SOD1 down	-0.384539	0.999968	non-significant	-2.95225	4.53922e-06	down	-2.56412	1.02637e-24	down	-0.476879	0.637581	non-significant
HOPX	ENSG00000171476	C9orf72 SOD1 down	0.182789	0.999968	non-significant	-4.17748	1.02955e-07	down	-3.0324	0.00115457	down	2.71906	0.0339101	up
DSCAM	ENSG00000171587	C9orf72 SOD1 down	-0.924914	0.999968	non-significant	-3.56504	0.000246399	down	-5.72898	1.11825e-06	down	0.240181	0.946303	non-significant
ZNF540	ENSG00000171817	C9orf72 SOD1 down	-0.0354653	0.999968	non-significant	-1.89838	0.00903745	down	-2.2257	0.00380894	down	0.542633	0.775841	non-significant
B3GALT1	ENSG00000172318	C9orf72 SOD1 down	-0.433465	0.999968	non-significant	-2.78974	0.000173925	down	-2.75297	2.83565e-05	down	0.70792	0.358851	non-significant
ABCD2	ENSG00000173208	C9orf72 SOD1 down	-0.221309	0.999968	non-significant	-2.25066	0.0302659	down	-1.4367	0.0432729	down	-0.222947	NA	non-significant
INSM1	ENSG00000173404	C9orf72 SOD1 down	-0.187368	0.999968	non-significant	-3.84908	0.000132172	down	-2.83052	0.0022902	down	0.646812	0.705964	non-significant
HAP1	ENSG00000173805	C9orf72 SOD1 down	-0.00124157	0.999968	non-significant	-3.96698	3.11367e-07	down	-2.54514	1.7319e-06	down	-1.74179	0.076315	non-significant
SPTBN2	ENSG00000173898	C9orf72 SOD1 down	0.258253	0.999968	non-significant	-1.64503	0.0476924	down	-1.29193	0.00609902	down	0.703627	0.19212	non-significant
VWC2L	ENSG00000174453	C9orf72 SOD1 down	0.5849	0.999968	non-significant	-3.47792	0.0330524	down	-4.41118	0.000186867	down	-0.924163	NA	non-significant
TTC9B	ENSG00000174521	C9orf72 SOD1 down	-0.0346011	0.999968	non-significant	-5.02453	0.000923468	down	-7.44467	1.62324e-06	down	0.519832	NA	non-significant
BRSK2	ENSG00000174672	C9orf72 SOD1 down	0.0522143	0.999968	non-significant	-4.61941	5.87978e-07	down	-2.90105	8.4559e-12	down	0.206335	0.853158	non-significant
FGFBP3	ENSG00000174721	C9orf72 SOD1 down	-1.20163	0.999968	non-significant	-3.93471	1.2603e-07	down	-3.40334	2.75093e-18	down	-0.296499	0.623555	non-significant
SPSB4	ENSG00000175093	C9orf72 SOD1 down	-0.28016	0.999968	non-significant	-3.02216	0.0184609	down	-2.0138	0.00764749	down	-0.44542	0.588579	non-significant
PCSK1	ENSG00000175426	C9orf72 SOD1 down	0.659397	0.999968	non-significant	-3.61682	9.97325e-05	down	-5.53611	2.67232e-07	down	3.02465	0.0278901	up
CDK5R1	ENSG00000176749	C9orf72 SOD1 down	-0.402156	0.999968	non-significant	-1.74595	0.000308629	down	-2.78582	1.69094e-21	down	0.243554	0.632987	non-significant
NCKAP5	ENSG00000176771	C9orf72 SOD1 down	-0.23901	0.999968	non-significant	-5.96477	4.18226e-15	down	-2.7914	0.000524504	down	0.106001	0.876276	non-significant
MIR7-3HG	ENSG00000176840	C9orf72 SOD1 down	-0.570939	0.999968	non-significant	-7.72885	0.00370458	down	-5.79283	0.000365651	down	NA	NA	non-significant
ZDHHC22	ENSG00000177108	C9orf72 SOD1 down	0.945121	0.999968	non-significant	-2.21744	0.0444081	down	-2.21425	2.69883e-07	down	0.871396	0.465575	non-significant
RIMKLA	ENSG00000177181	C9orf72 SOD1 down	-0.171498	0.999968	non-significant	-2.59051	0.00669569	down	-2.1498	0.0064265	down	-0.900831	0.280739	non-significant
AMER3	ENSG00000178171	C9orf72 SOD1 down	-0.203475	0.999968	non-significant	-5.60376	0.0102965	down	-5.58432	0.000435154	down	NA	NA	non-significant
TMEM151B	ENSG00000178233	C9orf72 SOD1 down	-0.480611	0.999968	non-significant	-4.50165	1.65845e-06	down	-6.69572	1.21533e-23	down	-0.652681	0.684855	non-significant
GLDC	ENSG00000178445	C9orf72 SOD1 down	-0.658448	0.999968	non-significant	-2.69963	5.7007e-11	down	-1.31601	0.00866024	down	-0.773778	0.377725	non-significant
TMTC2	ENSG00000179104	C9orf72 SOD1 down	-0.13197	0.999968	non-significant	-2.50445	0.0457484	down	-1.60988	0.000417362	down	-0.78532	0.141327	non-significant
WSCD1	ENSG00000179314	C9orf72 SOD1 down	-0.226288	0.999968	non-significant	-2.89448	6.72507e-14	down	-1.64667	5.43237e-08	down	-1.40983	0.0705725	non-significant
NRXN1	ENSG00000179915	C9orf72 SOD1 down	-0.0435321	0.999968	non-significant	-3.67348	0.0033555	down	-5.63107	1.58549e-23	down	-2.51539	0.0530317	non-significant
TMEM132E	ENSG00000181291	C9orf72 SOD1 down	-1.07883	0.999968	non-significant	-5.41328	2.43821e-09	down	-3.97869	4.19783e-25	down	-2.74031	0.458036	non-significant
FAM181B	ENSG00000182103	C9orf72 SOD1 down	-0.21037	0.999968	non-significant	-3.17324	0.00102701	down	-0.752715	0.0322108	down	0.253943	0.84332	non-significant
ABAT	ENSG00000183044	C9orf72 SOD1 down	-0.948784	0.999968	non-significant	-2.1711	0.00015228	down	-1.74866	5.03191e-17	down	0.0269265	0.962554	non-significant
C2CD4C	ENSG00000183186	C9orf72 SOD1 down	0.0701507	0.999968	non-significant	-1.94315	0.00487542	down	-2.78256	5.00945e-07	down	-0.607891	0.575162	non-significant
KCNH8	ENSG00000183960	C9orf72 SOD1 down	-0.925778	0.999968	non-significant	-2.53701	0.0280288	down	-4.48766	5.04038e-14	down	1.30928	0.381946	non-significant
PCDH9	ENSG00000184226	C9orf72 SOD1 down	-0.971932	0.999968	non-significant	-2.68828	2.31491e-06	down	-1.23714	0.024545	down	-0.294367	0.548109	non-significant
KCNK12	ENSG00000184261	C9orf72 SOD1 down	0.531684	0.999968	non-significant	-4.84689	0.000694956	down	-4.62614	0.00826013	down	0.928492	NA	non-significant
BEX5	ENSG00000184515	C9orf72 SOD1 down	-0.940244	0.999968	non-significant	-8.1354	0.0057102	down	-4.66251	0.0423254	down	-0.939777	NA	non-significant
SLC24A3	ENSG00000185052	C9orf72 SOD1 down	0.966171	0.999968	non-significant	-2.81239	0.0102444	down	-6.3328	1.78519e-07	down	-1.31809	0.220695	non-significant
MANEAL	ENSG00000185090	C9orf72 SOD1 down	0.485667	0.999968	non-significant	-1.57675	0.0127707	down	-1.62047	0.00161486	down	0.367247	0.514949	non-significant
SV2B	ENSG00000185518	C9orf72 SOD1 down	0.202052	0.999968	non-significant	-4.77545	0.035052	down	-5.1825	0.0100786	down	-2.80409	0.197915	non-significant
LSAMP	ENSG00000185565	C9orf72 SOD1 down	-0.415876	0.999968	non-significant	-4.57748	0.000186109	down	-3.49025	1.4794e-38	down	0.462641	0.538438	non-significant
SYN3	ENSG00000185666	C9orf72 SOD1 down	-0.0448267	0.999968	non-significant	-3.57172	0.0150491	down	-6.68962	8.75413e-11	down	-0.895481	NA	non-significant
KCNIP4	ENSG00000185774	C9orf72 SOD1 down	-0.00130834	0.999968	non-significant	-4.91748	2.11841e-05	down	-3.19873	3.29883e-05	down	1.07289	0.365729	non-significant
PTCH1	ENSG00000185920	C9orf72 SOD1 down	-0.486117	0.999968	non-significant	-2.60282	0.0097941	down	-2.87592	0.00249908	down	-0.108071	0.845366	non-significant
GNG2	ENSG00000186469	C9orf72 SOD1 down	-0.490048	0.999968	non-significant	-1.50599	0.00623137	down	-1.77785	7.7928e-06	down	-0.467004	0.410058	non-significant
MYT1L	ENSG00000186487	C9orf72 SOD1 down	-0.449791	0.999968	non-significant	-3.56516	0.00090719	down	-4.84653	4.0693e-09	down	1.00073	NA	non-significant
SLIT1	ENSG00000187122	C9orf72 SOD1 down	-1.38196	0.999968	non-significant	-4.30026	7.29051e-16	down	-6.11418	6.66216e-28	down	-0.0042065	0.996168	non-significant
AKR1C1	ENSG00000187134	C9orf72 SOD1 down	-0.286592	0.999968	non-significant	-1.49608	0.0325544	down	-5.63997	4.61122e-08	down	-0.99729	0.234959	non-significant
DCC	ENSG00000187323	C9orf72 SOD1 down	-0.355818	0.999968	non-significant	-5.07731	9.32996e-06	down	-6.19051	0.00279715	down	0.468226	0.750738	non-significant
SBK1	ENSG00000188322	C9orf72 SOD1 down	-0.602905	0.999968	non-significant	-3.58743	0.000300651	down	-2.53295	9.14097e-21	down	-0.653976	0.386813	non-significant
C2orf80	ENSG00000188674	C9orf72 SOD1 down	0.14781	0.999968	non-significant	-7.81059	2.36765e-09	down	-2.28742	0.0090315	down	0.010965	0.996168	non-significant
PAX5	ENSG00000196092	C9orf72 SOD1 down	-1.88912	0.999968	non-significant	-7.2128	0.00762168	down	-5.20516	0.00328615	down	-1.95633	0.522926	non-significant
MYT1	ENSG00000196132	C9orf72 SOD1 down	-1.12682	0.999968	non-significant	-4.37564	1.34956e-05	down	-7.85069	9.27142e-16	down	-1.54172	NA	non-significant
GREB1	ENSG00000196208	C9orf72 SOD1 down	0.155649	0.999968	non-significant	-3.43272	0.008596	down	-2.56374	0.0116887	down	-1.11505	0.156969	non-significant
ELAVL3	ENSG00000196361	C9orf72 SOD1 down	-1.12992	0.999968	non-significant	-6.51413	8.8961e-10	down	-5.23879	2.815e-37	down	-1.30867	0.51882	non-significant
POU3F4	ENSG00000196767	C9orf72 SOD1 down	-1.75959	0.999968	non-significant	-3.3861	0.0348131	down	-6.47322	3.27022e-12	down	0.134668	0.940582	non-significant
HES5	ENSG00000197921	C9orf72 SOD1 down	0.158371	0.999968	non-significant	-5.12216	0.00451711	down	-5.19577	0.00919484	down	-1.28178	NA	non-significant
RPS6KL1	ENSG00000198208	C9orf72 SOD1 down	-0.0887389	0.999968	non-significant	-3.02591	4.93426e-05	down	-3.85835	1.49845e-18	down	-0.262993	0.842741	non-significant
AFDN-DT	ENSG00000198221	C9orf72 SOD1 down	-0.596738	0.999968	non-significant	-5.08548	2.6329e-15	down	-4.13959	9.14741e-05	down	1.23791	0.391462	non-significant
NRARP	ENSG00000198435	C9orf72 SOD1 down	-0.161802	0.999968	non-significant	-3.51425	0.000266435	down	-3.18069	0.00196083	down	-0.204058	0.852192	non-significant
LRRTM3	ENSG00000198739	C9orf72 SOD1 down	-0.949417	0.999968	non-significant	-4.84565	1.72436e-06	down	-7.23756	5.50165e-06	down	-1.2993	0.240617	non-significant
C2orf72	ENSG00000204128	C9orf72 SOD1 down	0.131174	0.999968	non-significant	-3.04982	9.38043e-05	down	-1.49829	0.0145812	down	-0.966928	0.356656	non-significant
DISP3	ENSG00000204624	C9orf72 SOD1 down	0.23457	0.999968	non-significant	-4.01733	0.000525251	down	-2.70969	7.47996e-08	down	-1.261	0.0758474	non-significant
LRRC10B	ENSG00000204950	C9orf72 SOD1 down	-1.37928	0.999968	non-significant	-5.36532	0.0106462	down	-3.25883	8.24016e-12	down	-2.34529	0.161494	non-significant
ADGRG1	ENSG00000205336	C9orf72 SOD1 down	-0.442772	0.999968	non-significant	-1.47238	0.00131588	down	-1.60981	6.81137e-07	down	0.418323	0.219417	non-significant
TRIM71	ENSG00000206557	C9orf72 SOD1 down	-0.975599	0.999968	non-significant	-5.11624	0.0029997	down	-4.79554	1.36144e-05	down	0.8184	0.766066	non-significant
AL359091.1	ENSG00000207955	C9orf72 SOD1 down	0.520367	0.999968	non-significant	-10.1337	2.94981e-06	down	-5.38369	0.00593952	down	NA	NA	non-significant
KLHL23	ENSG00000213160	C9orf72 SOD1 down	-0.310674	0.999968	non-significant	-3.87163	1.22768e-07	down	-1.5154	0.00032309	down	-0.401282	0.505036	non-significant
ZNF891	ENSG00000214029	C9orf72 SOD1 down	0.216698	0.999968	non-significant	-2.65978	0.0131205	down	-1.5176	0.00393436	down	-0.0130369	0.990897	non-significant
NEURL1B	ENSG00000214357	C9orf72 SOD1 down	-0.0416911	0.999968	non-significant	-2.13052	0.00049713	down	-0.883635	0.0480951	down	-0.0313327	0.976547	non-significant
SP9	ENSG00000217236	C9orf72 SOD1 down	0.411932	0.999968	non-significant	-5.80008	0.000287843	down	-6.2215	7.79638e-05	down	-0.627939	NA	non-significant
FXYD7	ENSG00000221946	C9orf72 SOD1 down	0.395129	0.999968	non-significant	-5.12166	0.000385097	down	-7.34132	1.78819e-06	down	-0.630156	0.785837	non-significant
FAM95B1	ENSG00000223839	C9orf72 SOD1 down	0.700411	0.999968	non-significant	-2.56437	0.0242191	down	-3.8019	0.000221767	down	-0.443123	0.889612	non-significant
AL353150.1	ENSG00000224945	C9orf72 SOD1 down	-0.604348	0.999968	non-significant	-2.56394	0.00577999	down	-2.00946	0.0256782	down	-0.0565744	0.97311	non-significant
MIAT	ENSG00000225783	C9orf72 SOD1 down	0.197722	0.999968	non-significant	-2.69472	0.00559922	down	-2.81992	1.31251e-07	down	0.982792	0.00683027	up
LINC01876	ENSG00000226383	C9orf72 SOD1 down	-0.288079	0.999968	non-significant	-2.9036	0.000644198	down	-1.29678	0.0259484	down	0.105972	0.959618	non-significant
AC234582.1	ENSG00000231064	C9orf72 SOD1 down	-0.985091	0.999968	non-significant	-1.4448	0.0355618	down	-0.774728	0.00920289	down	-0.648312	0.53965	non-significant
SILC1	ENSG00000232044	C9orf72 SOD1 down	-0.555729	0.999968	non-significant	-3.70735	0.0326561	down	-3.1297	0.0175388	down	0.64702	0.656166	non-significant
PNMA2	ENSG00000240694	C9orf72 SOD1 down	-0.232594	0.999968	non-significant	-1.2293	0.0419633	down	-1.1145	1.09819e-05	down	-1.09379	0.128734	non-significant
GLYCTK-AS1	ENSG00000242797	C9orf72 SOD1 down	0.0689708	0.999968	non-significant	-5.31871	0.00290925	down	-2.28489	0.00157063	down	-1.08212	NA	non-significant
SOX2-OT	ENSG00000242808	C9orf72 SOD1 down	-0.979482	0.999968	non-significant	-2.94401	6.83855e-10	down	-1.5808	1.71809e-11	down	1.20235	0.125856	non-significant
LINC00599	ENSG00000253230	C9orf72 SOD1 down	0.257164	0.999968	non-significant	-4.30361	6.35599e-09	down	-4.96992	1.95133e-25	down	-2.19229	NA	non-significant
LINC02301	ENSG00000258743	C9orf72 SOD1 down	-0.706507	0.999968	non-significant	-5.23743	1.38535e-11	down	-4.36429	0.0432729	down	-0.338251	0.908898	non-significant
AC104083.1	ENSG00000260244	C9orf72 SOD1 down	-1.01606	0.999968	non-significant	-4.86328	4.01809e-05	down	-3.17826	0.00138753	down	0.0514929	0.974319	non-significant
AC004158.1	ENSG00000260664	C9orf72 SOD1 down	-0.0250244	0.999968	non-significant	-4.20936	5.39721e-12	down	-2.98282	0.00205259	down	0.041255	NA	non-significant
XKR7	ENSG00000260903	C9orf72 SOD1 down	-0.401428	0.999968	non-significant	-5.51154	0.000261007	down	-8.54149	8.67423e-12	down	1.26297	NA	non-significant
PECAM1	ENSG00000261371	C9orf72 SOD1 down	2.01766	0.999968	non-significant	-2.54438	0.0311743	down	-5.29637	0.0141543	down	-1.0797	0.665698	non-significant
CD24	ENSG00000272398	C9orf72 SOD1 down	0.116576	0.999968	non-significant	-2.37738	0.0100491	down	-1.31821	8.29446e-09	down	-2.57879	0.0507559	non-significant
ZBTB8B	ENSG00000273274	C9orf72 SOD1 down	-0.586329	0.999968	non-significant	-1.73382	0.0172122	down	-1.69044	2.86926e-05	down	-0.305852	0.758005	non-significant
H3C6	ENSG00000274750	C9orf72 SOD1 down	0.80472	0.999968	non-significant	-1.57457	0.00131588	down	-1.48237	0.0210062	down	0.864411	0.143685	non-significant
DACH1	ENSG00000276644	C9orf72 SOD1 down	-0.112266	0.999968	non-significant	-1.89683	0.0149271	down	-3.11509	6.60925e-10	down	-1.05677	0.226422	non-significant
NEFL	ENSG00000277586	C9orf72 SOD1 down	0.113408	0.999968	non-significant	-3.32279	0.000637747	down	-3.30743	7.54262e-16	down	3.60543	2.09472e-11	up
AC099521.3	ENSG00000279693	C9orf72 SOD1 down	-0.644188	0.999968	non-significant	-3.33919	0.043179	down	-6.58828	9.95864e-06	down	NA	NA	non-significant
UNCX	ENSG00000164853	C9orf72 SOD1 down	1.45278	NA	non-significant	-5.98984	0.0444081	down	-4.72983	0.0090315	down	NA	NA	non-significant
HMGN2P15	ENSG00000214578	C9orf72 SOD1 down	-0.303095	NA	non-significant	-6.74264	0.0164466	down	-5.06102	0.0238831	down	-1.75457	NA	non-significant
AL358075.4	ENSG00000278139	C9orf72 SOD1 down	NA	NA	non-significant	-9.39477	5.21607e-07	down	-7.74412	0.0285464	down	NA	NA	non-significant
COL4A4	ENSG00000081052	C9orf72 FUS up	-5.47711	0.0193557	down	3.58167	0.0436424	up	1.44174	NA	non-significant	3.83933	0.0162566	up
DYSF	ENSG00000135636	C9orf72 FUS up	2.62248	0.0929906	non-significant	2.9596	0.0028098	up	0.682139	0.663683	non-significant	4.04409	3.73427e-06	up
PRSS12	ENSG00000164099	C9orf72 FUS up	-4.35172	0.134143	non-significant	4.79113	0.00115584	up	-1.77426	0.000285037	down	1.8521	0.0313769	up
MYH11	ENSG00000133392	C9orf72 FUS up	3.01028	0.156776	non-significant	3.59209	0.000348593	up	3.18322	0.0529004	non-significant	2.98958	0.030311	up
DIRC3	ENSG00000231672	C9orf72 FUS up	1.74976	0.223626	non-significant	1.83752	0.0438242	up	-0.296504	0.889959	non-significant	2.90106	2.20272e-06	up
GALNT13	ENSG00000144278	C9orf72 FUS up	-1.65239	0.229402	non-significant	3.54849	6.3939e-13	up	-2.73354	2.97193e-09	down	1.65904	0.00119126	up
SLC16A3	ENSG00000141526	C9orf72 FUS up	2.55429	0.294425	non-significant	4.01521	1.16091e-15	up	0.0938685	0.971546	non-significant	2.20562	0.00129403	up
PDGFC	ENSG00000145431	C9orf72 FUS up	1.25698	0.339378	non-significant	1.8828	0.00127962	up	-0.432597	0.178942	non-significant	1.42255	1.61239e-18	up
FGF5	ENSG00000138675	C9orf72 FUS up	-3.19732	0.482554	non-significant	5.9114	0.000720864	up	-4.19453	0.0957385	non-significant	4.87873	0.00411925	up
KRT19	ENSG00000171345	C9orf72 FUS up	-3.09464	0.604417	non-significant	3.38426	0.0097941	up	2.83786	NA	non-significant	2.20771	2.28451e-06	up
SDC1	ENSG00000115884	C9orf72 FUS up	2.03594	0.606674	non-significant	2.5123	5.87978e-07	up	0.331501	0.694134	non-significant	1.06481	0.000924938	up
CDK15	ENSG00000138395	C9orf72 FUS up	2.22865	0.632466	non-significant	3.16063	5.52412e-05	up	0.3562	0.874085	non-significant	2.45338	0.000495517	up
RRAD	ENSG00000166592	C9orf72 FUS up	-2.27718	0.64204	non-significant	2.40518	0.000156203	up	0.934874	0.572606	non-significant	1.86209	6.76228e-05	up
PPM1H	ENSG00000111110	C9orf72 FUS up	-2.08813	0.672164	non-significant	1.70745	6.29365e-05	up	-2.54398	3.65452e-05	down	1.77361	0.00728185	up
LINC00862	ENSG00000203721	C9orf72 FUS up	2.581	0.682287	non-significant	3.90809	5.39044e-06	up	1.71458	NA	non-significant	3.38936	3.98228e-06	up
LINC00960	ENSG00000242516	C9orf72 FUS up	2.35366	0.695595	non-significant	2.4142	0.0148107	up	0.0889902	0.974437	non-significant	1.36445	0.00391042	up
MMP24	ENSG00000125966	C9orf72 FUS up	1.46283	0.740614	non-significant	2.65375	1.85036e-10	up	-1.94483	0.00374169	down	3.893	9.35555e-13	up
BNIP3	ENSG00000176171	C9orf72 FUS up	1.08028	0.871275	non-significant	1.80244	0.0035473	up	-0.576083	0.125065	non-significant	1.44271	1.32638e-07	up
AK4	ENSG00000162433	C9orf72 FUS up	1.06845	0.880311	non-significant	2.07988	1.63494e-05	up	-1.32089	9.46763e-05	down	1.124	0.000735021	up
RIMS1	ENSG00000079841	C9orf72 FUS up	-1.57229	0.880733	non-significant	2.00618	1.47895e-05	up	-6.54452	2.06647e-08	down	2.83939	7.36535e-05	up
SH2D4A	ENSG00000104611	C9orf72 FUS up	2.20815	0.902755	non-significant	2.11236	0.0443635	up	0.798616	NA	non-significant	1.50949	0.0167415	up
ALDH1B1	ENSG00000137124	C9orf72 FUS up	1.56604	0.907032	non-significant	2.13582	0.000700588	up	-0.133657	0.862564	non-significant	0.811524	0.0311743	up
MIR31HG	ENSG00000171889	C9orf72 FUS up	2.29023	0.930192	non-significant	3.11555	0.000577729	up	0.0320896	0.99152	non-significant	2.47438	0.00136785	up
PCDHA11	ENSG00000249158	C9orf72 FUS up	-1.26825	0.993388	non-significant	2.4877	0.000148472	up	-1.40949	0.58888	non-significant	4.76184	1.3839e-05	up
BAIAP2L1	ENSG00000006453	C9orf72 FUS up	1.23799	0.999968	non-significant	4.45052	8.29269e-05	up	-0.815914	0.745559	non-significant	0.871233	6.47766e-05	up
VCAN	ENSG00000038427	C9orf72 FUS up	0.31818	0.999968	non-significant	1.66148	0.00182322	up	0.285545	0.818795	non-significant	1.34493	2.07875e-13	up
LAMC2	ENSG00000058085	C9orf72 FUS up	1.12921	0.999968	non-significant	3.60688	9.06477e-05	up	2.06169	NA	non-significant	1.43185	0.010114	up
CLTCL1	ENSG00000070371	C9orf72 FUS up	1.1068	0.999968	non-significant	1.48051	0.00954292	up	0.05598	0.955585	non-significant	0.879826	0.0230473	up
FSTL3	ENSG00000070404	C9orf72 FUS up	0.838262	0.999968	non-significant	2.58193	0.00280684	up	0.189611	0.758157	non-significant	1.67993	3.75884e-07	up
FAP	ENSG00000078098	C9orf72 FUS up	1.42439	0.999968	non-significant	5.03907	2.85756e-05	up	1.64566	0.39271	non-significant	1.66572	0.0312146	up
SLC7A4	ENSG00000099960	C9orf72 FUS up	1.64679	0.999968	non-significant	3.67697	0.000500628	up	0.808301	NA	non-significant	3.06496	0.0001275	up
CTSZ	ENSG00000101160	C9orf72 FUS up	-0.148225	0.999968	non-significant	2.426	0.00701422	up	-0.435151	0.864323	non-significant	2.21895	1.09859e-05	up
HTR2A	ENSG00000102468	C9orf72 FUS up	-0.649107	0.999968	non-significant	3.53809	0.000142584	up	0.547405	0.824732	non-significant	1.69657	0.0426924	up
SLC1A1	ENSG00000106688	C9orf72 FUS up	1.14318	0.999968	non-significant	2.2533	0.0406015	up	-2.05759	0.0347038	down	1.25981	0.0238309	up
PTGDS	ENSG00000107317	C9orf72 FUS up	-0.091613	0.999968	non-significant	2.31822	0.0252525	up	-0.217634	0.782622	non-significant	2.21503	0.00717792	up
CDR2L	ENSG00000109089	C9orf72 FUS up	0.433395	0.999968	non-significant	1.09984	0.032353	up	0.280757	0.707474	non-significant	0.574511	0.000689179	up
INPP4B	ENSG00000109452	C9orf72 FUS up	0.513908	0.999968	non-significant	2.55836	1.61633e-08	up	0.906074	0.314575	non-significant	1.42405	0.0236147	up
VEGFA	ENSG00000112715	C9orf72 FUS up	0.698807	0.999968	non-significant	1.83019	0.00312673	up	-0.177841	0.83833	non-significant	1.01211	2.40389e-14	up
TBX18	ENSG00000112837	C9orf72 FUS up	1.53057	0.999968	non-significant	7.55806	0.00951593	up	-0.253219	NA	non-significant	1.26792	0.0189622	up
GHR	ENSG00000112964	C9orf72 FUS up	0.363226	0.999968	non-significant	1.48167	0.0203558	up	-2.87285	0.00156961	down	0.609694	0.00198974	up
RASGRF2	ENSG00000113319	C9orf72 FUS up	1.52118	0.999968	non-significant	5.00605	1.63074e-19	up	0.633505	0.544757	non-significant	2.08047	2.84651e-06	up
STC2	ENSG00000113739	C9orf72 FUS up	1.68806	0.999968	non-significant	3.10213	0.0152918	up	-1.45754	0.148083	non-significant	1.88274	0.000230991	up
CDK18	ENSG00000117266	C9orf72 FUS up	0.0989481	0.999968	non-significant	1.92517	0.020895	up	-1.16184	0.437953	non-significant	2.83411	1.09859e-05	up
SEC16B	ENSG00000120341	C9orf72 FUS up	0.461677	0.999968	non-significant	4.47239	4.52262e-08	up	1.89488	0.321402	non-significant	1.5407	0.00293512	up
KCNS1	ENSG00000124134	C9orf72 FUS up	0.133655	0.999968	non-significant	3.26744	0.00373389	up	0.810126	NA	non-significant	3.08987	2.6945e-07	up
F13A1	ENSG00000124491	C9orf72 FUS up	1.50305	0.999968	non-significant	3.90845	0.0242191	up	-4.40957	0.0460637	down	2.26974	0.00410627	up
TUBA4A	ENSG00000127824	C9orf72 FUS up	0.62328	0.999968	non-significant	2.22848	0.0157806	up	-0.809684	0.68346	non-significant	2.95271	3.32979e-08	up
POSTN	ENSG00000133110	C9orf72 FUS up	-1.89451	0.999968	non-significant	5.5444	2.70155e-11	up	-1.69326	0.391021	non-significant	1.99851	1.07442e-12	up
TBC1D8B	ENSG00000133138	C9orf72 FUS up	0.644366	0.999968	non-significant	2.62906	0.000348593	up	1.62705	0.155308	non-significant	0.998655	0.00712079	up
ADAMTS14	ENSG00000138316	C9orf72 FUS up	0.60514	0.999968	non-significant	1.54392	0.00150414	up	1.40838	0.116705	non-significant	2.26307	6.10594e-13	up
P3H4	ENSG00000141696	C9orf72 FUS up	0.565457	0.999968	non-significant	1.33498	0.0464025	up	0.551759	0.296445	non-significant	0.497343	0.00321236	up
HAPLN1	ENSG00000145681	C9orf72 FUS up	-1.06612	0.999968	non-significant	7.48714	0.0100424	up	-0.333146	NA	non-significant	2.64975	0.000103149	up
FAM50B	ENSG00000145945	C9orf72 FUS up	-0.690721	0.999968	non-significant	3.07249	4.39286e-08	up	3.1854	0.082268	non-significant	1.46568	0.0290063	up
ADAM12	ENSG00000148848	C9orf72 FUS up	0.740704	0.999968	non-significant	1.86968	0.00858537	up	0.509966	0.442898	non-significant	2.21219	3.91691e-10	up
ME3	ENSG00000151376	C9orf72 FUS up	-0.0515092	0.999968	non-significant	2.41768	3.60485e-06	up	0.552566	0.774688	non-significant	1.54986	0.00679464	up
NR3C2	ENSG00000151623	C9orf72 FUS up	-0.904812	0.999968	non-significant	2.9237	0.00114662	up	-0.269404	0.854437	non-significant	2.12461	7.52741e-05	up
ADAMTS1	ENSG00000154734	C9orf72 FUS up	-0.232808	0.999968	non-significant	4.13409	7.50004e-26	up	-2.97128	9.17619e-16	down	1.88263	7.88976e-06	up
PPARGC1B	ENSG00000155846	C9orf72 FUS up	0.476137	0.999968	non-significant	1.69749	0.00817265	up	-3.45342	0.0460637	down	1.38202	0.0484757	up
NRG1	ENSG00000157168	C9orf72 FUS up	-1.16107	0.999968	non-significant	1.78121	1.56473e-05	up	-3.10458	0.0484657	down	3.44389	1.40296e-20	up
MYO1E	ENSG00000157483	C9orf72 FUS up	0.144012	0.999968	non-significant	1.74058	6.90438e-05	up	0.653136	0.202486	non-significant	1.23328	0.00709775	up
AFAP1L1	ENSG00000157510	C9orf72 FUS up	1.91483	0.999968	non-significant	4.36215	0.000110373	up	-0.332893	0.916341	non-significant	1.74963	0.00185361	up
DYNC1I1	ENSG00000158560	C9orf72 FUS up	1.0095	0.999968	non-significant	3.24874	0.00154774	up	-3.10717	0.00166802	down	2.45066	3.57361e-05	up
S100A1	ENSG00000160678	C9orf72 FUS up	-1.10365	0.999968	non-significant	5.42131	0.00289477	up	1.43218	NA	non-significant	3.77632	0.0055322	up
IP6K3	ENSG00000161896	C9orf72 FUS up	0.652116	0.999968	non-significant	3.31828	0.000262583	up	-0.246749	NA	non-significant	2.3858	0.0178103	up
DHRS3	ENSG00000162496	C9orf72 FUS up	-0.0932629	0.999968	non-significant	2.5474	0.00924414	up	-0.840897	0.279006	non-significant	2.09329	0.0481481	up
SPATA18	ENSG00000163071	C9orf72 FUS up	0.428632	0.999968	non-significant	2.3314	0.0200399	up	-2.34483	1.66777e-13	down	1.0251	2.97473e-05	up
NFASC	ENSG00000163531	C9orf72 FUS up	0.434838	0.999968	non-significant	1.85211	0.0431483	up	-0.166285	0.811022	non-significant	2.09895	4.11036e-11	up
MELTF	ENSG00000163975	C9orf72 FUS up	-0.111514	0.999968	non-significant	2.16252	0.0418206	up	-3.44765	0.0026199	down	2.95265	5.61562e-08	up
PITX2	ENSG00000164093	C9orf72 FUS up	4.61537	0.999968	non-significant	7.4237	4.69428e-10	up	NA	NA	non-significant	4.85881	1.53388e-10	up
EDIL3	ENSG00000164176	C9orf72 FUS up	0.615454	0.999968	non-significant	4.07161	1.53543e-22	up	-2.59555	1.17213e-06	down	1.25318	0.00785776	up
C9orf64	ENSG00000165118	C9orf72 FUS up	-1.56534	0.999968	non-significant	1.4975	0.0227294	up	-3.48743	NA	non-significant	5.9111	9.28229e-08	up
TMEM63C	ENSG00000165548	C9orf72 FUS up	0.19128	0.999968	non-significant	1.7496	0.022545	up	-1.22647	0.0709139	non-significant	2.14401	7.34442e-07	up
DACT1	ENSG00000165617	C9orf72 FUS up	0.499871	0.999968	non-significant	2.17164	0.0181361	up	-0.0372672	0.970865	non-significant	1.41724	5.37854e-26	up
FRMD7	ENSG00000165694	C9orf72 FUS up	1.32872	0.999968	non-significant	3.66033	0.0312898	up	2.33232	NA	non-significant	3.61234	0.00830603	up
PTER	ENSG00000165983	C9orf72 FUS up	-1.06647	0.999968	non-significant	4.7146	8.0862e-14	up	1.20862	NA	non-significant	1.72426	6.13715e-05	up
BEAN1	ENSG00000166546	C9orf72 FUS up	1.0925	0.999968	non-significant	2.69571	2.05999e-05	up	-0.0112285	0.996067	non-significant	1.97859	0.0130593	up
GDNF	ENSG00000168621	C9orf72 FUS up	1.22793	0.999968	non-significant	3.96274	4.03858e-07	up	-0.935213	0.763823	non-significant	4.63062	1.37067e-09	up
KISS1	ENSG00000170498	C9orf72 FUS up	-0.956167	0.999968	non-significant	4.6942	3.67964e-16	up	0.345665	NA	non-significant	3.42493	0.0494563	up
PGAM1	ENSG00000171314	C9orf72 FUS up	0.574397	0.999968	non-significant	1.18239	0.0231795	up	-0.242095	0.623212	non-significant	0.433025	0.0278102	up
ABLIM3	ENSG00000173210	C9orf72 FUS up	0.795313	0.999968	non-significant	3.02449	9.89905e-07	up	-3.11991	0.000934163	down	1.61688	0.00511576	up
MYO1D	ENSG00000176658	C9orf72 FUS up	0.235912	0.999968	non-significant	2.75083	0.000292431	up	-0.342823	0.833504	non-significant	1.63191	0.0065824	up
ADAMTSL1	ENSG00000178031	C9orf72 FUS up	-1.3216	0.999968	non-significant	1.9087	3.67392e-07	up	0.0746125	0.961173	non-significant	2.99311	2.67405e-10	up
FOXS1	ENSG00000179772	C9orf72 FUS up	0.968951	0.999968	non-significant	4.1115	0.000666903	up	-0.664777	NA	non-significant	3.67713	0.00106315	up
FAM83H	ENSG00000180921	C9orf72 FUS up	0.589663	0.999968	non-significant	1.96408	0.0318722	up	0.844829	0.568787	non-significant	1.7859	5.31509e-07	up
EPGN	ENSG00000182585	C9orf72 FUS up	-0.414529	0.999968	non-significant	3.04945	0.0221468	up	0.148541	NA	non-significant	2.46158	0.000883386	up
TSPAN10	ENSG00000182612	C9orf72 FUS up	0.627895	0.999968	non-significant	1.78975	0.0326854	up	0.624394	0.592237	non-significant	1.12603	0.0398356	up
PRR16	ENSG00000184838	C9orf72 FUS up	-0.0109177	0.999968	non-significant	2.37779	0.00447132	up	0.418655	0.810938	non-significant	1.47577	0.00882509	up
TMEM106A	ENSG00000184988	C9orf72 FUS up	0.894138	0.999968	non-significant	1.50439	0.0144627	up	-0.482817	NA	non-significant	1.17268	0.0441104	up
TMEM215	ENSG00000188133	C9orf72 FUS up	-0.288648	0.999968	non-significant	4.01423	0.000608995	up	-1.29895	NA	non-significant	1.83878	0.00107018	up
SLC6A17	ENSG00000197106	C9orf72 FUS up	-0.398154	0.999968	non-significant	2.62828	0.00422091	up	-3.12653	0.00520736	down	2.71866	6.00832e-06	up
CCDC180	ENSG00000197816	C9orf72 FUS up	-0.0678427	0.999968	non-significant	1.7159	0.00463984	up	0.98494	0.0616813	non-significant	2.30849	0.00509712	up
H4-16	ENSG00000197837	C9orf72 FUS up	-0.318316	0.999968	non-significant	2.97185	2.67674e-08	up	-1.47299	0.558448	non-significant	3.08612	0.0130593	up
RUSC2	ENSG00000198853	C9orf72 FUS up	1.04579	0.999968	non-significant	1.58258	0.0420908	up	-0.379665	0.350495	non-significant	0.518655	0.00281233	up
MFAP3L	ENSG00000198948	C9orf72 FUS up	0.624021	0.999968	non-significant	1.897	3.67682e-05	up	0.975331	0.0849803	non-significant	1.23847	0.0268039	up
FAM155A	ENSG00000204442	C9orf72 FUS up	-0.151887	0.999968	non-significant	3.5335	1.2848e-06	up	-2.84685	1.61646e-10	down	0.867425	0.00440646	up
LCNL1	ENSG00000214402	C9orf72 FUS up	0.270826	0.999968	non-significant	2.91649	0.00339485	up	-2.3029	0.0012482	down	2.15826	0.038757	up
PPME1	ENSG00000214517	C9orf72 FUS up	0.446641	0.999968	non-significant	1.71794	6.64078e-06	up	-0.0643824	0.923832	non-significant	0.572577	0.0019764	up
AC135983.3	ENSG00000223509	C9orf72 FUS up	0.598758	0.999968	non-significant	2.25822	0.0106427	up	0.65459	0.253607	non-significant	1.57392	0.00118853	up
LINC01515	ENSG00000228065	C9orf72 FUS up	-1.38123	0.999968	non-significant	1.87343	0.0192103	up	1.26853	0.0670767	non-significant	1.80285	0.0495942	up
LINC01614	ENSG00000230838	C9orf72 FUS up	1.30376	0.999968	non-significant	7.39921	4.86818e-14	up	5.24204	NA	non-significant	3.24586	1.81291e-05	up
AC078850.1	ENSG00000248187	C9orf72 FUS up	-0.368251	0.999968	non-significant	5.02551	0.000227578	up	NA	NA	non-significant	3.57121	0.0130878	up
EDIL3-DT	ENSG00000250320	C9orf72 FUS up	0.132988	0.999968	non-significant	4.35443	8.75713e-22	up	-2.9069	0.00600117	down	1.8099	0.00346594	up
LIMS3	ENSG00000256977	C9orf72 FUS up	3.80016	0.999968	non-significant	1.99072	0.00811907	up	0.0830543	0.985906	non-significant	2.61209	0.00559737	up
CHMP1B2P	ENSG00000278530	C9orf72 FUS up	-1.45198	0.999968	non-significant	4.30839	0.0198409	up	1.11595	NA	non-significant	4.76557	0.000352396	up
Z84488.2	ENSG00000285446	C9orf72 FUS up	1.00916	0.999968	non-significant	3.24675	0.00323074	up	NA	NA	non-significant	2.74583	0.00594159	up
AC119673.3	ENSG00000286619	C9orf72 FUS up	-1.35809	0.999968	non-significant	4.66925	1.11905e-10	up	0.619775	0.250364	non-significant	0.752939	0.0439571	up
RASGRP1	ENSG00000172575	C9orf72 FUS down	-1.82411	0.064268	non-significant	-3.19987	0.00353014	down	-1.50406	0.322364	non-significant	-2.35762	0.000627801	down
ICOSLG	ENSG00000160223	C9orf72 FUS down	-1.7192	0.338592	non-significant	-2.55361	0.00186199	down	-1.69899	0.291608	non-significant	-1.95126	0.00857912	down
AC104964.4	ENSG00000272505	C9orf72 FUS down	-1.21436	0.435965	non-significant	-1.99623	0.0482283	down	-0.603254	0.297134	non-significant	-2.01685	0.0256586	down
CDH20	ENSG00000101542	C9orf72 FUS down	-2.15506	0.496224	non-significant	-4.90579	0.000542257	down	0.0916178	0.917199	non-significant	-3.59342	1.0558e-07	down
LRRC55	ENSG00000183908	C9orf72 FUS down	-1.0772	0.730644	non-significant	-5.29779	0.00584755	down	-1.42525	0.0539364	non-significant	-2.28402	0.0245359	down
LINC01833	ENSG00000259439	C9orf72 FUS down	-3.19805	0.77092	non-significant	-5.66683	0.0320873	down	1.80167	0.399412	non-significant	-4.22353	0.0336916	down
PCDH15	ENSG00000150275	C9orf72 FUS down	-2.20303	0.926408	non-significant	-2.44001	0.0231795	down	-1.60102	0.21619	non-significant	-1.64151	0.0333554	down
MAOB	ENSG00000069535	C9orf72 FUS down	-2.47616	0.931486	non-significant	-2.80365	0.0448813	down	2.50694	5.19511e-24	up	-2.49005	1.56088e-14	down
ETV1	ENSG00000006468	C9orf72 FUS down	-0.812086	0.999968	non-significant	-3.41622	0.00106192	down	-0.115964	0.935067	non-significant	-0.632733	0.0100623	down
GPM6B	ENSG00000046653	C9orf72 FUS down	-0.0754269	0.999968	non-significant	-1.49195	0.000664766	down	0.581327	0.310157	non-significant	-1.54169	0.00354858	down
SLC12A2	ENSG00000064651	C9orf72 FUS down	-0.144143	0.999968	non-significant	-1.0313	0.0336449	down	0.0582284	0.951305	non-significant	-0.629835	0.0285646	down
ABCC9	ENSG00000069431	C9orf72 FUS down	-1.67347	0.999968	non-significant	-5.61926	0.000158907	down	-0.316711	0.58888	non-significant	-2.46588	7.83761e-05	down
XRCC1	ENSG00000073050	C9orf72 FUS down	-0.231924	0.999968	non-significant	-1.00684	0.0363803	down	-0.0673277	0.941161	non-significant	-0.474933	0.0224309	down
EBF4	ENSG00000088881	C9orf72 FUS down	0.393227	0.999968	non-significant	-1.8521	0.0105601	down	-0.251129	0.668864	non-significant	-1.43893	0.0220834	down
CPXM1	ENSG00000088882	C9orf72 FUS down	0.427624	0.999968	non-significant	-3.41055	0.00144359	down	0.29181	0.425429	non-significant	-1.3193	0.0248536	down
CRYBB1	ENSG00000100122	C9orf72 FUS down	0.436653	0.999968	non-significant	-4.24585	0.0255542	down	1.55704	NA	non-significant	-4.91269	3.17293e-06	down
CDC25B	ENSG00000101224	C9orf72 FUS down	-0.0184312	0.999968	non-significant	-1.95936	0.00348282	down	-0.518199	0.420553	non-significant	-0.838417	0.0222156	down
E2F1	ENSG00000101412	C9orf72 FUS down	-0.0449754	0.999968	non-significant	-2.10276	0.0407471	down	0.351649	0.566841	non-significant	-0.802654	0.0138523	down
POLA1	ENSG00000101868	C9orf72 FUS down	-0.110007	0.999968	non-significant	-1.09609	0.0447701	down	1.12418	0.00250062	up	-0.966641	0.00460925	down
PCYT1B	ENSG00000102230	C9orf72 FUS down	-0.63975	0.999968	non-significant	-1.86	0.00109622	down	1.29335	5.24876e-05	up	-1.17593	0.00224144	down
CA2	ENSG00000104267	C9orf72 FUS down	-0.491361	0.999968	non-significant	-3.14598	0.038368	down	0.648392	0.104561	non-significant	-3.30107	2.92956e-31	down
TFPI2	ENSG00000105825	C9orf72 FUS down	-0.0194334	0.999968	non-significant	-3.36219	0.004042	down	3.10939	6.49797e-06	up	-3.2231	1.66125e-10	down
MAPK10	ENSG00000109339	C9orf72 FUS down	-0.693998	0.999968	non-significant	-2.34235	0.0268671	down	-0.339907	0.598576	non-significant	-1.78018	0.00673999	down
CHKA	ENSG00000110721	C9orf72 FUS down	-0.711239	0.999968	non-significant	-1.25045	0.0269544	down	-0.0118001	0.989707	non-significant	-0.557498	0.0437429	down
MCM3	ENSG00000112118	C9orf72 FUS down	-0.0199848	0.999968	non-significant	-1.48987	0.0397479	down	0.57805	0.0570348	non-significant	-0.337666	0.0424979	down
OPRD1	ENSG00000116329	C9orf72 FUS down	0.3975	0.999968	non-significant	-2.41693	0.038368	down	-3.13567	NA	non-significant	-2.88642	0.0100151	down
ID3	ENSG00000117318	C9orf72 FUS down	-0.0304998	0.999968	non-significant	-1.62493	0.00241975	down	-0.239348	0.849324	non-significant	-1.32545	4.07977e-05	down
KCNJ8	ENSG00000121361	C9orf72 FUS down	-0.525011	0.999968	non-significant	-2.75729	0.0339604	down	-0.38344	0.72868	non-significant	-1.8213	0.00865954	down
ARL4A	ENSG00000122644	C9orf72 FUS down	0.51737	0.999968	non-significant	-2.55451	0.0136279	down	-0.441938	0.671547	non-significant	-0.917983	4.83401e-06	down
CCZ1	ENSG00000122674	C9orf72 FUS down	-0.170926	0.999968	non-significant	-1.31017	0.0481519	down	-0.273513	0.816184	non-significant	-0.522215	0.0444653	down
CHST8	ENSG00000124302	C9orf72 FUS down	0.886317	0.999968	non-significant	-3.80802	0.000410277	down	0.290477	0.890011	non-significant	-2.99904	0.00800633	down
SLF1	ENSG00000133302	C9orf72 FUS down	-0.261224	0.999968	non-significant	-1.44383	0.0390627	down	0.218746	0.821326	non-significant	-1.13038	0.00697474	down
MRAP2	ENSG00000135324	C9orf72 FUS down	-0.0811686	0.999968	non-significant	-1.5967	0.0338169	down	-0.350107	0.763063	non-significant	-5.20307	2.31027e-20	down
EPHA7	ENSG00000135333	C9orf72 FUS down	-1.59275	0.999968	non-significant	-2.16137	0.00697189	down	0.60074	0.216084	non-significant	-2.3003	8.31053e-06	down
SEMA6D	ENSG00000137872	C9orf72 FUS down	-0.0284153	0.999968	non-significant	-1.52436	0.0256897	down	0.233879	0.637266	non-significant	-1.25477	0.00450808	down
MMRN1	ENSG00000138722	C9orf72 FUS down	-1.42396	0.999968	non-significant	-6.97533	0.000890757	down	-1.05046	0.360986	non-significant	-2.41983	0.000267138	down
CPNE2	ENSG00000140848	C9orf72 FUS down	-0.170665	0.999968	non-significant	-1.16528	0.0152918	down	-0.623373	0.18848	non-significant	-0.657785	0.0192449	down
NLGN4X	ENSG00000146938	C9orf72 FUS down	-0.58355	0.999968	non-significant	-1.63158	0.0137671	down	-0.698224	0.281925	non-significant	-1.60639	0.00651939	down
ZC3H12C	ENSG00000149289	C9orf72 FUS down	-0.507946	0.999968	non-significant	-1.31281	0.0101131	down	-0.306235	0.44148	non-significant	-0.560421	0.0019243	down
FREM2	ENSG00000150893	C9orf72 FUS down	-1.51518	0.999968	non-significant	-2.63353	0.000286366	down	-1.15138	0.112663	non-significant	-2.83164	3.03157e-08	down
TSPAN33	ENSG00000158457	C9orf72 FUS down	-0.696646	0.999968	non-significant	-1.57497	0.0266674	down	0.19854	0.856011	non-significant	-1.04416	0.0138593	down
TONSL	ENSG00000160949	C9orf72 FUS down	-0.0195914	0.999968	non-significant	-2.12116	0.0419686	down	0.506969	0.276824	non-significant	-0.685875	0.00461477	down
CCDC74A	ENSG00000163040	C9orf72 FUS down	-0.0710969	0.999968	non-significant	-2.76067	0.00241608	down	0.374068	0.553691	non-significant	-0.967973	0.00653346	down
NYAP1	ENSG00000166924	C9orf72 FUS down	-0.872343	0.999968	non-significant	-1.81815	0.0314546	down	-0.605113	0.146244	non-significant	-2.42625	1.70899e-08	down
CTNND2	ENSG00000169862	C9orf72 FUS down	-0.456123	0.999968	non-significant	-1.33131	0.048633	down	-0.602957	0.197552	non-significant	-1.73218	0.000122326	down
LONRF2	ENSG00000170500	C9orf72 FUS down	0.421204	0.999968	non-significant	-1.59224	0.0109292	down	-0.780407	0.0978732	non-significant	-2.04384	0.000106356	down
BCL2	ENSG00000171791	C9orf72 FUS down	-0.415487	0.999968	non-significant	-1.97802	9.17735e-06	down	0.00948757	0.992401	non-significant	-0.93869	0.00683528	down
ID4	ENSG00000172201	C9orf72 FUS down	-0.785842	0.999968	non-significant	-2.30919	1.05746e-07	down	-0.599781	0.183702	non-significant	-1.62579	3.19801e-08	down
TSHZ2	ENSG00000182463	C9orf72 FUS down	0.646469	0.999968	non-significant	-2.3062	0.000159071	down	-1.33837	0.0827891	non-significant	-1.99073	0.0281076	down
CSMD1	ENSG00000183117	C9orf72 FUS down	-0.625091	0.999968	non-significant	-5.51369	0.00169034	down	-9.5801	NA	non-significant	-5.30727	0.00104561	down
SEMA4D	ENSG00000187764	C9orf72 FUS down	-0.165035	0.999968	non-significant	-3.28933	0.0266674	down	-0.967729	0.195705	non-significant	-2.20408	0.0193476	down
CRYBA4	ENSG00000196431	C9orf72 FUS down	0.263708	0.999968	non-significant	-3.89493	0.0292869	down	1.65385	NA	non-significant	-4.15005	0.00604905	down
PPP1R14C	ENSG00000198729	C9orf72 FUS down	-0.140647	0.999968	non-significant	-3.27046	0.00770668	down	0.27575	0.576229	non-significant	-1.64809	0.0226312	down
ELFN1	ENSG00000225968	C9orf72 FUS down	0.644916	0.999968	non-significant	-1.38104	0.00762291	down	-0.162739	0.798661	non-significant	-1.43914	0.0101716	down
AJ009632.2	ENSG00000229425	C9orf72 FUS down	-0.0847848	0.999968	non-significant	-4.38929	0.0490959	down	0.491626	NA	non-significant	-5.53842	2.91074e-07	down
AC099792.1	ENSG00000231252	C9orf72 FUS down	0.210293	0.999968	non-significant	-3.88589	0.000987885	down	0.746398	0.446272	non-significant	-3.18905	0.0163656	down
GABRQ	ENSG00000268089	C9orf72 FUS down	-0.314765	0.999968	non-significant	-6.45578	5.98316e-06	down	-1.63295	0.0764719	non-significant	-1.68366	0.00849156	down
TMSB15B	ENSG00000269226	C9orf72 FUS down	-0.152257	0.999968	non-significant	-1.56169	0.0101076	down	0.052668	0.969504	non-significant	-0.780216	0.0303134	down
AGBL1	ENSG00000273540	C9orf72 FUS down	0.731321	0.999968	non-significant	-5.00734	0.0177163	down	-2.24889	0.0776698	non-significant	-3.11136	0.0467398	down
MMP2	ENSG00000087245	SOD1 FUS up	1.84498	0.0666206	non-significant	1.69033	0.130517	non-significant	2.61105	5.3631e-08	up	1.18924	0.0172189	up
MAP3K21	ENSG00000143674	SOD1 FUS up	-2.20639	0.0666206	non-significant	0.898915	0.384321	non-significant	2.33147	0.00143502	up	1.17898	0.0325303	up
AC131571.1	ENSG00000228061	SOD1 FUS up	2.164	0.0927015	non-significant	0.94659	0.833658	non-significant	2.50224	0.0293733	up	2.84542	0.0282856	up
CPA4	ENSG00000128510	SOD1 FUS up	-1.54601	0.115041	non-significant	2.1579	0.0599601	non-significant	6.51798	9.91228e-37	up	2.09563	0.00854461	up
MYLK	ENSG00000065534	SOD1 FUS up	2.48614	0.11646	non-significant	1.08521	0.585065	non-significant	2.82846	0.00276382	up	2.18198	0.00299524	up
P4HA3	ENSG00000149380	SOD1 FUS up	2.40789	0.125379	non-significant	1.42396	0.25162	non-significant	3.78704	0.0275185	up	1.22703	2.52919e-06	up
CCDC152	ENSG00000198865	SOD1 FUS up	-1.88553	0.266407	non-significant	1.5077	0.737531	non-significant	4.11724	0.000184474	up	4.4637	8.76426e-05	up
AC060834.2	ENSG00000234710	SOD1 FUS up	-3.49203	0.332753	non-significant	-1.93114	0.630982	non-significant	4.54825	0.0148534	up	4.11027	0.0246613	up
GRB14	ENSG00000115290	SOD1 FUS up	-1.6196	0.396174	non-significant	0.488495	0.879968	non-significant	1.42936	0.044967	up	2.0258	0.0267952	up
FILIP1L	ENSG00000168386	SOD1 FUS up	2.0755	0.396174	non-significant	0.973792	0.622585	non-significant	2.80854	3.01562e-05	up	2.30866	1.43438e-10	up
ITGA11	ENSG00000137809	SOD1 FUS up	2.62233	0.477285	non-significant	2.86453	0.204149	non-significant	5.24161	1.39147e-10	up	1.63371	3.82528e-07	up
PRICKLE1	ENSG00000139174	SOD1 FUS up	1.20056	0.610379	non-significant	1.32666	0.392487	non-significant	2.15555	0.000162732	up	1.09266	0.00113445	up
CHI3L1	ENSG00000133048	SOD1 FUS up	-3.10952	0.612967	non-significant	-1.26454	0.432673	non-significant	3.95766	0.00034135	up	4.62648	0.00557808	up
NUPR1	ENSG00000176046	SOD1 FUS up	1.59797	0.761399	non-significant	1.62743	0.385032	non-significant	1.35073	0.00659929	up	0.710405	0.0143039	up
SPSB1	ENSG00000171621	SOD1 FUS up	1.83784	0.812725	non-significant	0.887263	0.601702	non-significant	1.80372	0.00138753	up	0.617641	0.0125837	up
COL5A1	ENSG00000130635	SOD1 FUS up	0.954789	0.816061	non-significant	1.82909	0.177177	non-significant	2.40603	9.18469e-07	up	0.888671	0.0206739	up
ADAMTS16	ENSG00000145536	SOD1 FUS up	0.883614	0.906333	non-significant	-0.332031	0.929705	non-significant	4.04359	1.82271e-13	up	2.31659	0.0139117	up
SEMA3F	ENSG00000001617	SOD1 FUS up	-0.179201	0.999968	non-significant	1.77681	0.285792	non-significant	1.6655	8.99299e-05	up	1.29774	0.0317809	up
PLXND1	ENSG00000004399	SOD1 FUS up	0.668213	0.999968	non-significant	1.07119	0.474131	non-significant	1.54452	3.91881e-05	up	1.24111	0.00389968	up
AK2	ENSG00000004455	SOD1 FUS up	0.18577	0.999968	non-significant	0.109831	0.967962	non-significant	0.970107	0.0424296	up	0.639958	0.0436908	up
CHPF2	ENSG00000033100	SOD1 FUS up	0.278016	0.999968	non-significant	1.17184	0.0644334	non-significant	0.95645	0.0372428	up	0.459467	0.000140911	up
TNC	ENSG00000041982	SOD1 FUS up	0.604597	0.999968	non-significant	0.727428	0.681038	non-significant	1.15632	0.00863017	up	1.83486	5.75132e-15	up
HSPA5	ENSG00000044574	SOD1 FUS up	0.506281	0.999968	non-significant	0.535555	0.787367	non-significant	1.01526	8.39025e-05	up	0.237137	0.00104567	up
HHAT	ENSG00000054392	SOD1 FUS up	0.787019	0.999968	non-significant	1.21334	0.500907	non-significant	0.85272	0.0155663	up	0.730987	6.97827e-05	up
SLC2A3	ENSG00000059804	SOD1 FUS up	-0.544447	0.999968	non-significant	-0.255073	0.925446	non-significant	0.923219	0.005569	up	0.810432	0.0133202	up
COL11A1	ENSG00000060718	SOD1 FUS up	-0.267789	0.999968	non-significant	1.52445	0.459722	non-significant	4.3609	1.51913e-49	up	1.22074	9.79788e-08	up
CNN2	ENSG00000064666	SOD1 FUS up	0.176721	0.999968	non-significant	0.855954	0.225713	non-significant	1.16063	0.000923667	up	0.492482	0.0471826	up
TRAM2	ENSG00000065308	SOD1 FUS up	0.640775	0.999968	non-significant	0.634313	0.819522	non-significant	1.51549	7.32471e-06	up	1.39328	0.000496134	up
PDIA5	ENSG00000065485	SOD1 FUS up	0.0179525	0.999968	non-significant	0.644785	0.734826	non-significant	0.843562	0.00255863	up	0.897998	0.00271702	up
LMCD1	ENSG00000071282	SOD1 FUS up	0.301095	0.999968	non-significant	2.09389	0.213569	non-significant	2.47095	0.00016559	up	2.10189	0.000319521	up
NUAK1	ENSG00000074590	SOD1 FUS up	0.58427	0.999968	non-significant	0.903735	0.338776	non-significant	2.4275	9.0504e-23	up	1.26977	0.0405198	up
FOSL2	ENSG00000075426	SOD1 FUS up	-0.248716	0.999968	non-significant	0.692727	0.782934	non-significant	1.98969	0.00690371	up	0.465974	0.0376704	up
PLOD1	ENSG00000083444	SOD1 FUS up	0.78947	0.999968	non-significant	1.23508	0.292809	non-significant	1.38628	0.000207707	up	0.570348	0.00493054	up
B4GALT1	ENSG00000086062	SOD1 FUS up	0.606304	0.999968	non-significant	2.09918	0.0590098	non-significant	0.800191	0.024545	up	1.17848	0.0013875	up
TASP1	ENSG00000089123	SOD1 FUS up	0.285166	0.999968	non-significant	-0.0440495	0.991828	non-significant	1.15705	0.000859073	up	1.33857	0.00493054	up
GADD45B	ENSG00000099860	SOD1 FUS up	-0.315816	0.999968	non-significant	0.587244	0.839631	non-significant	1.95519	0.00301639	up	1.66401	5.56168e-28	up
XBP1	ENSG00000100219	SOD1 FUS up	0.491501	0.999968	non-significant	0.526266	0.705879	non-significant	1.1192	1.47069e-06	up	0.418253	9.65608e-07	up
PYGL	ENSG00000100504	SOD1 FUS up	0.781075	0.999968	non-significant	0.101796	0.975412	non-significant	1.58206	3.91538e-08	up	0.683416	1.6021e-15	up
FERMT1	ENSG00000101311	SOD1 FUS up	1.09957	0.999968	non-significant	1.31031	0.24326	non-significant	6.08349	1.08175e-07	up	1.88949	0.0102452	up
CHRDL1	ENSG00000101938	SOD1 FUS up	-0.444173	0.999968	non-significant	1.26066	0.267498	non-significant	2.11213	5.82216e-21	up	1.80494	0.00200267	up
PLP2	ENSG00000102007	SOD1 FUS up	0.23536	0.999968	non-significant	1.01655	0.425317	non-significant	1.04008	0.0119498	up	1.09238	0.00852831	up
MEST	ENSG00000106484	SOD1 FUS up	0.0588073	0.999968	non-significant	-0.428836	0.638085	non-significant	0.503084	0.038733	up	1.76149	0.00132603	up
LHPP	ENSG00000107902	SOD1 FUS up	0.413993	0.999968	non-significant	0.645489	0.691975	non-significant	1.96012	0.0288933	up	0.543929	0.0216953	up
SYNGR2	ENSG00000108639	SOD1 FUS up	0.19748	0.999968	non-significant	0.321648	0.894092	non-significant	1.90361	0.000160278	up	1.01708	0.00731192	up
ABCC3	ENSG00000108846	SOD1 FUS up	-0.246536	0.999968	non-significant	-0.0513477	0.991348	non-significant	2.8589	2.5536e-12	up	3.39276	0.000144642	up
SYT10	ENSG00000110975	SOD1 FUS up	-2.82399	0.999968	non-significant	-2.03647	0.878033	non-significant	2.54566	0.00466638	up	4.56528	0.00985388	up
TNS2	ENSG00000111077	SOD1 FUS up	0.244242	0.999968	non-significant	1.01467	0.0904602	non-significant	1.7626	0.00735372	up	1.17745	0.00192358	up
ABHD14B	ENSG00000114779	SOD1 FUS up	0.359117	0.999968	non-significant	1.50042	0.153125	non-significant	0.928852	0.0444725	up	0.616692	0.0387882	up
ITGA4	ENSG00000115232	SOD1 FUS up	0.477633	0.999968	non-significant	-0.576029	0.860278	non-significant	2.18405	0.0177643	up	1.39328	0.0381838	up
CALD1	ENSG00000122786	SOD1 FUS up	0.489553	0.999968	non-significant	1.64968	0.273272	non-significant	2.6371	3.66646e-14	up	0.804077	0.00569514	up
MMP24OS	ENSG00000126005	SOD1 FUS up	0.0802966	0.999968	non-significant	0.904789	0.152518	non-significant	1.25264	0.0171163	up	0.557481	0.0160206	up
HIVEP3	ENSG00000127124	SOD1 FUS up	0.338126	0.999968	non-significant	0.152413	0.972472	non-significant	1.81125	0.00156961	up	1.23058	0.0157693	up
EDN2	ENSG00000127129	SOD1 FUS up	-0.695305	0.999968	non-significant	-0.169817	0.979658	non-significant	5.0412	6.15303e-08	up	5.12307	0.000287789	up
LIF	ENSG00000128342	SOD1 FUS up	0.366426	0.999968	non-significant	-0.518345	0.920382	non-significant	2.49564	9.52695e-09	up	1.47931	0.000905593	up
YIPF2	ENSG00000130733	SOD1 FUS up	0.0969648	0.999968	non-significant	0.918215	0.356318	non-significant	0.908082	0.0288134	up	0.702277	0.000339819	up
DNAJB1	ENSG00000132002	SOD1 FUS up	0.219621	0.999968	non-significant	0.742701	0.18233	non-significant	0.891357	0.0383785	up	0.306726	0.0423083	up
EFR3A	ENSG00000132294	SOD1 FUS up	0.655968	0.999968	non-significant	0.769204	0.334994	non-significant	0.854524	0.00532014	up	0.642845	0.00138434	up
MORC4	ENSG00000133131	SOD1 FUS up	0.315994	0.999968	non-significant	1.27786	0.132978	non-significant	2.29552	3.29538e-19	up	0.567884	5.42074e-06	up
BHLHE40	ENSG00000134107	SOD1 FUS up	0.459494	0.999968	non-significant	0.788243	0.641686	non-significant	1.81948	0.00626344	up	1.08204	4.68914e-17	up
ETS1	ENSG00000134954	SOD1 FUS up	0.144296	0.999968	non-significant	-0.200175	0.966997	non-significant	1.71919	6.7876e-05	up	0.704557	0.0151298	up
FAM189A2	ENSG00000135063	SOD1 FUS up	-0.823617	0.999968	non-significant	1.1493	0.578888	non-significant	1.75633	1.67722e-09	up	2.86837	0.00639243	up
RNASEL	ENSG00000135828	SOD1 FUS up	0.104124	0.999968	non-significant	-0.506635	0.850795	non-significant	1.78218	0.0317724	up	0.786149	0.0291797	up
IER3	ENSG00000137331	SOD1 FUS up	-0.405103	0.999968	non-significant	1.75749	0.26838	non-significant	2.48837	1.02375e-09	up	0.940303	5.79258e-05	up
LRIG3	ENSG00000139263	SOD1 FUS up	0.337792	0.999968	non-significant	0.147103	0.974518	non-significant	1.65492	0.00775916	up	1.34806	0.016069	up
TMX1	ENSG00000139921	SOD1 FUS up	-0.0252001	0.999968	non-significant	-0.0283775	0.990343	non-significant	0.718455	0.0147111	up	0.403831	2.06395e-05	up
FRMD6	ENSG00000139926	SOD1 FUS up	0.146756	0.999968	non-significant	1.75042	0.176879	non-significant	1.81754	0.0031668	up	1.96507	6.20901e-23	up
ARRDC4	ENSG00000140450	SOD1 FUS up	-0.169049	0.999968	non-significant	0.886464	0.355195	non-significant	0.67169	0.0371915	up	1.24945	3.29712e-09	up
KCNH1	ENSG00000143473	SOD1 FUS up	0.795311	0.999968	non-significant	-0.379846	0.957371	non-significant	1.62284	0.0105762	up	1.89202	7.87342e-16	up
GALNT2	ENSG00000143641	SOD1 FUS up	0.655669	0.999968	non-significant	0.472342	0.798971	non-significant	0.996403	0.0311332	up	0.956602	7.57294e-10	up
LEFTY2	ENSG00000143768	SOD1 FUS up	-0.135288	0.999968	non-significant	0.278904	0.929213	non-significant	2.84978	0.000145838	up	4.02596	0.018123	up
PHLDB2	ENSG00000144824	SOD1 FUS up	0.742786	0.999968	non-significant	1.8007	0.159308	non-significant	1.95467	0.00337985	up	0.97275	2.4597e-05	up
PLK2	ENSG00000145632	SOD1 FUS up	-0.0604036	0.999968	non-significant	-0.266823	0.948326	non-significant	1.69277	0.00813788	up	0.85759	0.0409296	up
TMEM47	ENSG00000147027	SOD1 FUS up	-0.309471	0.999968	non-significant	0.863136	0.675513	non-significant	0.800023	0.0180021	up	0.329075	0.0309482	up
MSN	ENSG00000147065	SOD1 FUS up	0.0657344	0.999968	non-significant	0.766838	0.494898	non-significant	0.841747	0.0171357	up	0.302609	0.030736	up
FBXO25	ENSG00000147364	SOD1 FUS up	-0.0391939	0.999968	non-significant	0.651832	0.542447	non-significant	1.04077	0.0150469	up	1.06365	0.000691137	up
ANKRD1	ENSG00000148677	SOD1 FUS up	-0.285627	0.999968	non-significant	-0.727861	0.945741	non-significant	5.56608	1.06002e-11	up	1.83798	0.000455	up
PRSS23	ENSG00000150687	SOD1 FUS up	0.400133	0.999968	non-significant	0.7825	0.301654	non-significant	1.51229	2.68293e-09	up	1.82817	4.68817e-05	up
SEC24D	ENSG00000150961	SOD1 FUS up	0.273781	0.999968	non-significant	1.77385	0.169435	non-significant	1.69267	1.06061e-06	up	0.735738	0.0247325	up
PTPN14	ENSG00000152104	SOD1 FUS up	-0.115011	0.999968	non-significant	1.34245	0.370884	non-significant	2.23165	1.90172e-21	up	0.764251	0.000160418	up
TGOLN2	ENSG00000152291	SOD1 FUS up	0.214019	0.999968	non-significant	0.731957	0.306529	non-significant	0.752385	0.00305617	up	0.375132	5.58434e-11	up
PDE1C	ENSG00000154678	SOD1 FUS up	-0.398714	0.999968	non-significant	0.130587	0.973393	non-significant	2.41065	3.72263e-09	up	1.93399	0.0153166	up
SLC16A1	ENSG00000155380	SOD1 FUS up	0.557771	0.999968	non-significant	0.244508	0.853396	non-significant	0.992904	0.00401139	up	0.542189	1.45514e-08	up
MAP3K7CL	ENSG00000156265	SOD1 FUS up	0.816577	0.999968	non-significant	0.720047	0.877412	non-significant	3.89565	4.13449e-08	up	4.02613	1.01165e-08	up
FBXO32	ENSG00000156804	SOD1 FUS up	-0.253086	0.999968	non-significant	1.67596	0.10929	non-significant	1.98053	0.00160148	up	2.21606	9.00583e-13	up
CLSTN2	ENSG00000158258	SOD1 FUS up	0.439388	0.999968	non-significant	2.33062	0.113852	non-significant	0.689009	0.0363522	up	2.26288	5.23881e-13	up
ADORA1	ENSG00000163485	SOD1 FUS up	-0.131508	0.999968	non-significant	-1.42027	0.312771	non-significant	2.07707	1.28814e-07	up	2.12398	2.99425e-05	up
CDCP1	ENSG00000163814	SOD1 FUS up	-0.23189	0.999968	non-significant	-0.474784	0.910757	non-significant	1.81553	0.0375945	up	0.962182	0.0305591	up
PGRMC2	ENSG00000164040	SOD1 FUS up	0.0634266	0.999968	non-significant	1.25489	0.0654489	non-significant	1.32865	2.01321e-05	up	0.915877	5.36163e-07	up
FZD6	ENSG00000164930	SOD1 FUS up	0.742706	0.999968	non-significant	1.04695	0.32889	non-significant	2.57051	1.00373e-09	up	1.01877	7.09461e-12	up
CLDN2	ENSG00000165376	SOD1 FUS up	-0.814713	0.999968	non-significant	0.462499	NA	non-significant	5.75495	0.00763495	up	3.5498	0.000441091	up
IKBIP	ENSG00000166130	SOD1 FUS up	-0.161164	0.999968	non-significant	0.42873	0.670766	non-significant	0.755069	0.0194332	up	0.480509	0.0474844	up
PDIA3	ENSG00000167004	SOD1 FUS up	0.0922851	0.999968	non-significant	0.784832	0.280612	non-significant	1.16187	0.000897725	up	0.417256	8.06417e-06	up
UBXN6	ENSG00000167671	SOD1 FUS up	0.175507	0.999968	non-significant	0.748439	0.374163	non-significant	1.06503	0.0422888	up	0.316275	0.0272814	up
LDLRAD4	ENSG00000168675	SOD1 FUS up	0.240378	0.999968	non-significant	1.91066	0.163197	non-significant	1.79268	0.039168	up	1.17857	0.0178862	up
SDC2	ENSG00000169439	SOD1 FUS up	-0.355604	0.999968	non-significant	0.920327	0.0778248	non-significant	2.22073	1.83448e-07	up	0.576206	0.0149007	up
CXXC5	ENSG00000171604	SOD1 FUS up	0.251194	0.999968	non-significant	0.808062	0.601903	non-significant	1.36094	0.000556443	up	0.529213	0.0356693	up
TMEM51	ENSG00000171729	SOD1 FUS up	-0.137509	0.999968	non-significant	1.13607	0.0778656	non-significant	2.1289	1.50631e-06	up	1.31698	0.00703766	up
LRRC15	ENSG00000172061	SOD1 FUS up	1.45886	0.999968	non-significant	-0.415868	0.942427	non-significant	3.89136	0.00111346	up	1.8261	0.00113445	up
SNX18	ENSG00000178996	SOD1 FUS up	-0.0681859	0.999968	non-significant	0.576909	0.726537	non-significant	0.896472	0.00434388	up	0.635001	8.42188e-07	up
PIPOX	ENSG00000179761	SOD1 FUS up	0.493168	0.999968	non-significant	0.28931	0.849317	non-significant	2.10836	0.000114696	up	2.39039	2.00133e-06	up
SSC5D	ENSG00000179954	SOD1 FUS up	0.427675	0.999968	non-significant	1.61226	0.413393	non-significant	2.61387	1.22768e-10	up	0.918693	0.00165973	up
HMGN4	ENSG00000182952	SOD1 FUS up	-0.0103118	0.999968	non-significant	-0.333369	0.761915	non-significant	1.42049	0.0258318	up	0.968349	0.0193196	up
CADM1	ENSG00000182985	SOD1 FUS up	0.372068	0.999968	non-significant	0.228883	0.962802	non-significant	0.961515	0.0304723	up	1.63136	8.03867e-06	up
GPC6	ENSG00000183098	SOD1 FUS up	0.347686	0.999968	non-significant	-1.22803	0.534921	non-significant	0.956425	0.0384784	up	1.07453	0.000408411	up
KIRREL1	ENSG00000183853	SOD1 FUS up	0.229482	0.999968	non-significant	0.85563	0.562842	non-significant	1.31082	1.39103e-10	up	0.763776	4.38702e-09	up
PLA2G6	ENSG00000184381	SOD1 FUS up	-0.157998	0.999968	non-significant	0.0891552	0.9725	non-significant	1.22874	0.000808087	up	0.827513	0.0133868	up
P4HB	ENSG00000185624	SOD1 FUS up	0.313318	0.999968	non-significant	1.22661	0.0731746	non-significant	0.847384	0.029773	up	0.492097	4.99615e-05	up
COL14A1	ENSG00000187955	SOD1 FUS up	-0.806099	0.999968	non-significant	-1.29604	0.563173	non-significant	2.62684	7.31231e-07	up	3.46811	3.56181e-05	up
ARL4C	ENSG00000188042	SOD1 FUS up	0.0881672	0.999968	non-significant	0.308765	0.853983	non-significant	1.39026	3.03118e-09	up	0.939162	0.000530775	up
LCTL	ENSG00000188501	SOD1 FUS up	-0.386468	0.999968	non-significant	0.79699	0.685442	non-significant	1.69359	0.00631737	up	2.61385	3.91691e-10	up
CPNE4	ENSG00000196353	SOD1 FUS up	0.614669	0.999968	non-significant	0.388668	0.910445	non-significant	3.36221	3.07833e-22	up	1.27695	0.0437059	up
SULT1A1	ENSG00000196502	SOD1 FUS up	1.02844	0.999968	non-significant	0.99262	0.483893	non-significant	4.90265	1.45137e-07	up	1.39645	0.0300643	up
INF2	ENSG00000203485	SOD1 FUS up	0.308956	0.999968	non-significant	0.829734	0.481002	non-significant	1.21728	0.0103795	up	0.745193	0.0252845	up
RBM20	ENSG00000203867	SOD1 FUS up	-0.696592	0.999968	non-significant	-0.347712	0.773103	non-significant	0.978771	0.00788774	up	1.49006	0.00414119	up
LINC00963	ENSG00000204054	SOD1 FUS up	0.710733	0.999968	non-significant	0.855676	0.23196	non-significant	1.1675	0.0457426	up	0.677903	0.000200121	up
DPF3	ENSG00000205683	SOD1 FUS up	-0.646393	0.999968	non-significant	-0.469252	0.769276	non-significant	1.74151	0.000362967	up	1.13486	0.00661004	up
HACD2	ENSG00000206527	SOD1 FUS up	-0.125648	0.999968	non-significant	0.653018	0.400487	non-significant	0.961595	0.0180831	up	0.857886	2.35694e-05	up
RTL8B	ENSG00000212747	SOD1 FUS up	0.251968	0.999968	non-significant	0.359747	0.798358	non-significant	1.30643	0.000100829	up	0.429933	0.0232184	up
PPP1CB	ENSG00000213639	SOD1 FUS up	-0.0960909	0.999968	non-significant	-1.04076	0.0290616	down	0.865693	0.0371609	up	0.493731	0.00420485	up
LINC00649	ENSG00000237945	SOD1 FUS up	0.525997	0.999968	non-significant	-0.229989	0.898218	non-significant	3.94832	3.57588e-06	up	3.27566	0.0103187	up
NEAT1	ENSG00000245532	SOD1 FUS up	0.855554	0.999968	non-significant	-0.334671	0.861015	non-significant	1.45898	0.0222547	up	1.0348	0.0376427	up
BAALC-AS1	ENSG00000247081	SOD1 FUS up	0.690835	0.999968	non-significant	1.19077	0.0978874	non-significant	2.59593	0.00125287	up	0.870575	0.00405575	up
AC022424.1	ENSG00000250579	SOD1 FUS up	0.636708	0.999968	non-significant	0.349754	0.937689	non-significant	3.15509	8.14151e-21	up	2.50044	0.000282733	up
AC136475.1	ENSG00000251661	SOD1 FUS up	-1.00121	0.999968	non-significant	-0.0900357	0.977728	non-significant	1.55912	0.0338454	up	3.20679	5.15132e-06	up
AL627309.6	ENSG00000268903	SOD1 FUS up	0.555223	0.999968	non-significant	-2.66211	NA	non-significant	2.36443	0.0123511	up	6.21589	1.69247e-05	up
AL139393.3	ENSG00000272841	SOD1 FUS up	1.1729	0.999968	non-significant	-0.575511	0.855576	non-significant	1.4444	0.0480026	up	1.00362	0.00776411	up
F8A1	ENSG00000277203	SOD1 FUS up	0.0340044	0.999968	non-significant	1.42151	0.063449	non-significant	1.51221	0.020215	up	0.576092	0.038662	up
AC007325.4	ENSG00000278817	SOD1 FUS up	-0.0638285	0.999968	non-significant	-0.410969	0.714133	non-significant	1.27523	0.00677424	up	1.03483	5.84992e-05	up
AC004922.1	ENSG00000284292	SOD1 FUS up	0.573539	0.999968	non-significant	0.913605	0.184299	non-significant	1.37984	0.0202336	up	0.513208	0.0317663	up
AL035078.4	ENSG00000285283	SOD1 FUS up	0.489856	0.999968	non-significant	0.256185	0.91396	non-significant	0.767658	0.0370397	up	0.485634	0.0332958	up
AC061958.1	ENSG00000287069	SOD1 FUS up	0.542597	0.999968	non-significant	-0.430038	0.980331	non-significant	6.53916	5.56171e-07	up	7.55048	1.039e-15	up
SLC30A8	ENSG00000164756	SOD1 FUS up	NA	NA	non-significant	2.08069	0.689234	non-significant	5.67214	2.0234e-05	up	4.82061	7.49109e-05	up
KCNE4	ENSG00000152049	SOD1 FUS down	2.95806	1.7266e-05	up	-0.448556	0.91017	non-significant	-3.31991	0.0239052	down	-2.1104	4.48971e-07	down
AC009403.2	ENSG00000283128	SOD1 FUS down	2.67453	0.0538436	non-significant	0.409659	0.947762	non-significant	-4.3503	0.00991161	down	-2.29183	0.0136334	down
EN2	ENSG00000164778	SOD1 FUS down	4.18293	0.0711317	non-significant	1.45044	0.884841	non-significant	-5.54634	0.000612693	down	-3.31493	1.03045e-08	down
RORB	ENSG00000198963	SOD1 FUS down	-2.14453	0.0756757	non-significant	-0.403542	0.894092	non-significant	-3.96791	0.00289511	down	-1.68713	0.0178324	down
CPT1C	ENSG00000169169	SOD1 FUS down	-1.31269	0.0991747	non-significant	0.23631	0.92788	non-significant	-0.819221	0.00711927	down	-1.30165	0.0496325	down
EFCAB1	ENSG00000034239	SOD1 FUS down	-3.95309	0.104111	non-significant	-0.0413212	0.992557	non-significant	-1.71616	0.000209161	down	-2.50396	0.0302376	down
HLA-DPB1	ENSG00000223865	SOD1 FUS down	-2.03313	0.168094	non-significant	-1.37451	0.55884	non-significant	-2.04733	0.039208	down	-1.39588	0.0398356	down
SPINK5	ENSG00000133710	SOD1 FUS down	-2.50256	0.213378	non-significant	-1.64567	0.283189	non-significant	-3.00925	0.00102324	down	-2.23079	0.00263543	down
FRMD4B	ENSG00000114541	SOD1 FUS down	-1.89381	0.24684	non-significant	-1.90795	0.476515	non-significant	-1.53554	0.0324221	down	-1.3899	0.00247075	down
COL23A1	ENSG00000050767	SOD1 FUS down	1.64887	0.250015	non-significant	1.13454	0.678371	non-significant	-3.99583	2.16209e-05	down	-8.28981	3.96188e-24	down
MAL2	ENSG00000147676	SOD1 FUS down	-3.82237	0.275047	non-significant	1.87517	NA	non-significant	-3.91525	0.00231555	down	-2.00952	0.0137326	down
S1PR1	ENSG00000170989	SOD1 FUS down	-2.63597	0.302554	non-significant	-1.26197	0.588718	non-significant	-2.51933	2.50793e-08	down	-1.45025	0.0264485	down
C11orf87	ENSG00000185742	SOD1 FUS down	-1.54281	0.329946	non-significant	0.586003	0.864688	non-significant	-1.68089	0.000236218	down	-1.73381	1.69126e-05	down
CFC1	ENSG00000136698	SOD1 FUS down	6.17542	0.387373	non-significant	-7.47547	0.141745	non-significant	-4.51939	6.72656e-05	down	-6.01777	0.000914927	down
AJAP1	ENSG00000196581	SOD1 FUS down	-1.9004	0.405364	non-significant	-0.360512	0.952347	non-significant	-1.96304	0.000264938	down	-5.1338	4.89043e-31	down
SYN2	ENSG00000157152	SOD1 FUS down	1.70625	0.413178	non-significant	0.375383	0.963934	non-significant	-3.43183	0.0230288	down	-1.74496	0.0126678	down
DUSP6	ENSG00000139318	SOD1 FUS down	-1.20187	0.463869	non-significant	-1.30691	0.120262	non-significant	-1.68296	0.00423948	down	-2.09007	4.23629e-06	down
FZD10	ENSG00000111432	SOD1 FUS down	-6.56179	0.506871	non-significant	-4.32082	0.441447	non-significant	-8.33915	0.00427037	down	-2.80938	0.00581348	down
GRM3	ENSG00000198822	SOD1 FUS down	-2.74125	0.530098	non-significant	-3.4227	0.248991	non-significant	-2.59405	0.00404401	down	-2.73157	0.00801127	down
KCNK2	ENSG00000082482	SOD1 FUS down	-3.08543	0.607357	non-significant	2.42556	0.491008	non-significant	-5.78872	0.000159445	down	-2.05526	0.0222323	down
CDH18	ENSG00000145526	SOD1 FUS down	-2.38322	0.632384	non-significant	-0.670347	0.832386	non-significant	-4.68274	0.0067167	down	-2.86236	4.62769e-09	down
PEG13	ENSG00000282164	SOD1 FUS down	1.254	0.632384	non-significant	-1.00986	0.598669	non-significant	-1.61855	0.0345927	down	-3.47752	9.08063e-08	down
MDGA2	ENSG00000139915	SOD1 FUS down	-2.33026	0.659474	non-significant	-1.71059	0.0897422	non-significant	-8.79747	4.00973e-11	down	-1.63158	0.0185104	down
CPT1A	ENSG00000110090	SOD1 FUS down	1.49306	0.659733	non-significant	0.0353938	0.987251	non-significant	-0.962992	0.0421358	down	-0.562421	0.0397234	down
VGF	ENSG00000128564	SOD1 FUS down	1.12015	0.678884	non-significant	-1.21553	0.166599	non-significant	-3.77057	2.39131e-05	down	-1.72032	0.0459358	down
RELN	ENSG00000189056	SOD1 FUS down	-2.49567	0.72142	non-significant	2.14141	0.206247	non-significant	-8.05715	3.35094e-48	down	-3.18765	0.000359192	down
PTGER4	ENSG00000171522	SOD1 FUS down	-1.55179	0.72828	non-significant	3.83797	0.000173925	up	-4.60473	0.0259851	down	-2.08946	0.000656542	down
DNAJC12	ENSG00000108176	SOD1 FUS down	1.10385	0.730644	non-significant	0.416498	0.836751	non-significant	-2.80205	2.95108e-07	down	-1.35161	0.000229582	down
SST	ENSG00000157005	SOD1 FUS down	1.33366	0.762102	non-significant	-0.798676	NA	non-significant	-3.52251	0.0284239	down	-3.18596	0.000159586	down
SNCA	ENSG00000145335	SOD1 FUS down	-1.52121	0.804389	non-significant	0.23781	0.967097	non-significant	-1.51168	0.00400864	down	-1.57054	0.000294989	down
CPAMD8	ENSG00000160111	SOD1 FUS down	-1.5422	0.8085	non-significant	0.374367	0.925446	non-significant	-1.85311	0.0280316	down	-1.84838	0.0180296	down
SLITRK4	ENSG00000179542	SOD1 FUS down	-2.86729	0.852416	non-significant	7.11479	2.81616e-06	up	-7.68975	8.82356e-08	down	-2.55795	4.4166e-08	down
DIO3	ENSG00000197406	SOD1 FUS down	-2.72172	0.906888	non-significant	-5.23367	0.163409	non-significant	-4.72362	7.01125e-13	down	-7.05064	2.01899e-20	down
NECAB2	ENSG00000103154	SOD1 FUS down	-1.95218	0.910409	non-significant	-1.63365	0.0612913	non-significant	-2.05551	4.23242e-06	down	-2.41462	0.00991966	down
FAM78B	ENSG00000188859	SOD1 FUS down	-1.67607	0.920461	non-significant	-1.30008	0.616453	non-significant	-2.98498	7.62428e-05	down	-2.86662	0.00256253	down
CNTNAP3B	ENSG00000154529	SOD1 FUS down	1.25967	0.965413	non-significant	-1.75146	0.380008	non-significant	-2.18365	1.29763e-06	down	-4.65967	6.50582e-16	down
SV2C	ENSG00000122012	SOD1 FUS down	-1.71802	0.966943	non-significant	-0.182115	0.9725	non-significant	-6.78415	1.03281e-12	down	-4.11732	1.68066e-05	down
GNAO1	ENSG00000087258	SOD1 FUS down	-0.778714	0.984732	non-significant	-1.49366	0.189219	non-significant	-4.63389	1.0789e-22	down	-3.00713	0.000467484	down
CYP51A1	ENSG00000001630	SOD1 FUS down	-0.598343	0.999968	non-significant	0.0380301	0.989994	non-significant	-1.18403	0.000445655	down	-0.996648	2.88551e-08	down
TAC1	ENSG00000006128	SOD1 FUS down	-2.92967	0.999968	non-significant	-5.47611	0.279231	non-significant	-6.38339	4.25932e-08	down	-2.76487	0.000244613	down
CACNA1G	ENSG00000006283	SOD1 FUS down	-0.232916	0.999968	non-significant	-0.927327	0.738688	non-significant	-3.00456	0.00655037	down	-1.4429	0.00447159	down
DNAH9	ENSG00000007174	SOD1 FUS down	-1.40915	0.999968	non-significant	-0.26919	0.956152	non-significant	-2.69815	7.0864e-08	down	-2.86252	5.66307e-05	down
DLEC1	ENSG00000008226	SOD1 FUS down	-1.1629	0.999968	non-significant	-2.39851	0.190495	non-significant	-1.31454	0.0457763	down	-4.26653	0.000326564	down
MAPK8IP2	ENSG00000008735	SOD1 FUS down	-0.445227	0.999968	non-significant	-0.693601	0.757106	non-significant	-3.00389	6.37473e-20	down	-1.20805	0.00934471	down
RHOBTB2	ENSG00000008853	SOD1 FUS down	-0.225429	0.999968	non-significant	-0.299566	0.885823	non-significant	-1.06936	0.0271088	down	-1.7277	0.00106201	down
FYN	ENSG00000010810	SOD1 FUS down	0.113556	0.999968	non-significant	-0.175832	0.924007	non-significant	-0.702631	0.0214991	down	-0.651056	0.0282113	down
MYOM2	ENSG00000036448	SOD1 FUS down	-1.42088	0.999968	non-significant	2.68259	0.758295	non-significant	-4.4685	0.00016667	down	-4.46286	1.06697e-06	down
RAB27B	ENSG00000041353	SOD1 FUS down	0.395977	0.999968	non-significant	-0.874619	0.84793	non-significant	-2.14012	0.0208787	down	-3.16838	2.63531e-05	down
SLC4A8	ENSG00000050438	SOD1 FUS down	-0.528598	0.999968	non-significant	-1.42655	0.14905	non-significant	-0.944672	0.0226106	down	-1.1099	0.00274242	down
MSMO1	ENSG00000052802	SOD1 FUS down	-0.815654	0.999968	non-significant	-0.299155	0.88355	non-significant	-1.46005	2.01821e-08	down	-0.944067	0.0154887	down
FSTL4	ENSG00000053108	SOD1 FUS down	-1.11933	0.999968	non-significant	-0.289243	0.964114	non-significant	-3.47013	0.0417667	down	-6.50595	5.76269e-07	down
KIF1B	ENSG00000054523	SOD1 FUS down	-0.406482	0.999968	non-significant	-0.488982	0.674645	non-significant	-1.19389	1.067e-05	down	-0.62528	0.0198605	down
LPAR2	ENSG00000064547	SOD1 FUS down	-0.595112	0.999968	non-significant	-0.0854845	0.976557	non-significant	-2.19468	7.12617e-13	down	-1.44953	0.00707929	down
ANKS1A	ENSG00000064999	SOD1 FUS down	-0.48759	0.999968	non-significant	-0.364133	0.849795	non-significant	-0.787235	0.0217565	down	-0.506549	0.0185426	down
SNAP91	ENSG00000065609	SOD1 FUS down	-0.812539	0.999968	non-significant	-1.61302	0.306285	non-significant	-2.58461	2.45766e-07	down	-3.46469	5.65312e-05	down
IDI1	ENSG00000067064	SOD1 FUS down	-0.922002	0.999968	non-significant	-0.756465	0.516322	non-significant	-1.65445	7.46586e-11	down	-0.763279	0.0170048	down
NAV3	ENSG00000067798	SOD1 FUS down	0.159811	0.999968	non-significant	1.0884	0.429851	non-significant	-1.1758	0.0303916	down	-1.75315	0.0177794	down
GRIPAP1	ENSG00000068400	SOD1 FUS down	-0.0721624	0.999968	non-significant	-0.0932688	0.967097	non-significant	-0.819612	0.0345057	down	-0.822168	2.58006e-08	down
ST6GAL1	ENSG00000073849	SOD1 FUS down	0.842239	0.999968	non-significant	0.0907508	0.970477	non-significant	-1.78151	0.00169005	down	-1.41506	0.00520952	down
PLXNA2	ENSG00000076356	SOD1 FUS down	-0.835846	0.999968	non-significant	0.0173074	0.995434	non-significant	-2.13071	6.73212e-05	down	-0.950682	0.0474027	down
TP53INP2	ENSG00000078804	SOD1 FUS down	-0.497359	0.999968	non-significant	-0.622717	0.450535	non-significant	-1.19885	0.0274107	down	-0.573391	8.59185e-05	down
CDH7	ENSG00000081138	SOD1 FUS down	1.0376	0.999968	non-significant	0.308727	0.925427	non-significant	-6.0766	2.50103e-05	down	-2.76708	9.63301e-06	down
LRP2	ENSG00000081479	SOD1 FUS down	-0.347595	0.999968	non-significant	-5.90727	0.126546	non-significant	-2.11418	7.72079e-14	down	-2.29904	0.00919882	down
PPEF1	ENSG00000086717	SOD1 FUS down	-1.55016	0.999968	non-significant	-1.74372	0.603407	non-significant	-5.01397	0.0288376	down	-2.49415	0.0118443	down
ADAMTS2	ENSG00000087116	SOD1 FUS down	1.06008	0.999968	non-significant	0.3029	0.956349	non-significant	-5.08909	0.000376763	down	-2.3086	2.47826e-05	down
ZFHX4	ENSG00000091656	SOD1 FUS down	-0.090085	0.999968	non-significant	-0.886691	0.291557	non-significant	-1.84087	6.11162e-09	down	-0.579979	0.0474844	down
NOL4	ENSG00000101746	SOD1 FUS down	-0.404924	0.999968	non-significant	-2.66887	0.102679	non-significant	-3.24974	3.60551e-06	down	-2.29027	0.0190969	down
PCDH11X	ENSG00000102290	SOD1 FUS down	-2.16103	0.999968	non-significant	0.983096	0.91017	non-significant	-7.16839	3.4258e-09	down	-2.40379	8.76426e-05	down
DRP2	ENSG00000102385	SOD1 FUS down	0.248073	0.999968	non-significant	1.22398	0.397286	non-significant	-2.05802	0.000353182	down	-1.19442	7.28025e-06	down
ARHGEF7	ENSG00000102606	SOD1 FUS down	-0.433664	0.999968	non-significant	-0.471286	0.57832	non-significant	-1.21876	6.43479e-05	down	-0.578132	0.00138698	down
CBLN1	ENSG00000102924	SOD1 FUS down	-1.3725	0.999968	non-significant	1.70254	0.543433	non-significant	-4.44694	0.00464396	down	-6.0049	1.38744e-11	down
SETD6	ENSG00000103037	SOD1 FUS down	-0.350885	0.999968	non-significant	-0.314795	0.878354	non-significant	-2.71505	6.40021e-09	down	-0.528553	0.0159957	down
COTL1	ENSG00000103187	SOD1 FUS down	-0.0105824	0.999968	non-significant	-0.70363	0.394227	non-significant	-1.38765	0.00537485	down	-0.435484	0.00518352	down
SQLE	ENSG00000104549	SOD1 FUS down	-0.825226	0.999968	non-significant	-0.637163	0.638268	non-significant	-1.00911	0.000483999	down	-0.466604	0.0215865	down
TMEM59L	ENSG00000105696	SOD1 FUS down	0.317905	0.999968	non-significant	0.321001	0.90412	non-significant	-1.34731	0.00303812	down	-1.48333	0.0166268	down
CDH23	ENSG00000107736	SOD1 FUS down	-1.06001	0.999968	non-significant	0.0524537	0.992557	non-significant	-0.946849	0.049831	down	-4.1166	6.09895e-24	down
ARHGAP21	ENSG00000107863	SOD1 FUS down	-0.399202	0.999968	non-significant	-0.0851554	0.97496	non-significant	-1.18243	3.89188e-05	down	-0.596586	0.0286825	down
ZMIZ1	ENSG00000108175	SOD1 FUS down	-0.191839	0.999968	non-significant	0.325072	0.87404	non-significant	-1.31582	4.57394e-05	down	-0.797715	0.020274	down
MTMR4	ENSG00000108389	SOD1 FUS down	-0.420144	0.999968	non-significant	-0.20072	0.929213	non-significant	-1.01436	0.00869065	down	-0.682392	0.0379813	down
TMEM97	ENSG00000109084	SOD1 FUS down	-0.445864	0.999968	non-significant	-1.13417	0.447467	non-significant	-1.18988	0.0133664	down	-1.18871	0.00200647	down
FBXW7	ENSG00000109670	SOD1 FUS down	-0.194649	0.999968	non-significant	-0.227415	0.855601	non-significant	-0.745839	0.0405587	down	-1.06524	4.69266e-06	down
B3GAT1	ENSG00000109956	SOD1 FUS down	-0.842815	0.999968	non-significant	-0.490172	0.782934	non-significant	-2.97838	4.56808e-09	down	-1.72446	0.0470598	down
KIAA1549L	ENSG00000110427	SOD1 FUS down	-0.551182	0.999968	non-significant	-0.593527	0.491205	non-significant	-2.02199	6.11637e-11	down	-1.19586	0.0243991	down
MADD	ENSG00000110514	SOD1 FUS down	0.201627	0.999968	non-significant	-0.54408	0.593832	non-significant	-1.20498	1.49466e-06	down	-0.476197	0.0237774	down
PTPN5	ENSG00000110786	SOD1 FUS down	-0.361901	0.999968	non-significant	-3.51459	0.10929	non-significant	-6.3056	6.98672e-10	down	-4.11013	0.00491703	down
MVK	ENSG00000110921	SOD1 FUS down	-0.544914	0.999968	non-significant	-0.347282	0.85426	non-significant	-1.70577	6.64245e-05	down	-0.678917	0.0107527	down
LIN7A	ENSG00000111052	SOD1 FUS down	-0.106759	0.999968	non-significant	-1.75867	0.205938	non-significant	-1.76521	0.000152064	down	-0.76837	0.0177436	down
CMAS	ENSG00000111726	SOD1 FUS down	0.119388	0.999968	non-significant	-0.4153	0.731727	non-significant	-0.79873	0.041568	down	-0.348166	0.0104537	down
B3GAT2	ENSG00000112309	SOD1 FUS down	-0.560958	0.999968	non-significant	-2.26335	0.375065	non-significant	-2.27476	0.000585527	down	-3.16574	0.00148358	down
PDE10A	ENSG00000112541	SOD1 FUS down	0.786418	0.999968	non-significant	-1.62696	0.213372	non-significant	-3.12254	1.65587e-12	down	-2.92329	1.67717e-10	down
HMGCS1	ENSG00000112972	SOD1 FUS down	-0.919521	0.999968	non-significant	-1.41426	0.197412	non-significant	-2.42789	5.24993e-46	down	-0.881909	0.00198467	down
RHOU	ENSG00000116574	SOD1 FUS down	0.693904	0.999968	non-significant	-2.04366	0.310605	non-significant	-1.31004	0.0102639	down	-1.86005	0.00306462	down
KIF17	ENSG00000117245	SOD1 FUS down	-0.435687	0.999968	non-significant	-0.393913	0.892663	non-significant	-2.02675	6.65218e-05	down	-1.89482	0.0232511	down
CA14	ENSG00000118298	SOD1 FUS down	0.0700382	0.999968	non-significant	-2.2575	0.26666	non-significant	-2.33819	0.0284551	down	-2.48117	0.0311468	down
ELOVL4	ENSG00000118402	SOD1 FUS down	-0.0544903	0.999968	non-significant	-0.389292	0.758376	non-significant	-0.957972	0.0261262	down	-0.659247	0.00339492	down
OLFM3	ENSG00000118733	SOD1 FUS down	-2.3357	0.999968	non-significant	3.32744	NA	non-significant	-5.50202	0.0011881	down	-3.98679	0.0355571	down
CNRIP1	ENSG00000119865	SOD1 FUS down	0.11074	0.999968	non-significant	-0.520271	0.660514	non-significant	-1.51259	7.0283e-05	down	-0.848688	7.41544e-06	down
ACAT2	ENSG00000120437	SOD1 FUS down	-0.556468	0.999968	non-significant	-1.12418	0.441968	non-significant	-2.35339	1.58424e-15	down	-0.899386	0.0350641	down
TOX2	ENSG00000124191	SOD1 FUS down	0.00788898	0.999968	non-significant	-1.27518	0.339692	non-significant	-2.64099	4.57866e-10	down	-2.49492	0.00937914	down
RAP2A	ENSG00000125249	SOD1 FUS down	-0.426503	0.999968	non-significant	-0.281566	0.798477	non-significant	-1.43179	8.26788e-05	down	-0.447246	0.0172517	down
TMEM74B	ENSG00000125895	SOD1 FUS down	0.540634	0.999968	non-significant	-2.39568	0.107871	non-significant	-3.30465	0.000409699	down	-4.19207	0.000102397	down
DACH2	ENSG00000126733	SOD1 FUS down	-0.596583	0.999968	non-significant	-2.57736	0.263495	non-significant	-5.23716	1.16258e-10	down	-3.82955	0.00830603	down
MGAT3	ENSG00000128268	SOD1 FUS down	-0.371639	0.999968	non-significant	-1.37043	0.366626	non-significant	-1.53766	0.000107546	down	-1.07625	0.0364145	down
CDKN2D	ENSG00000129355	SOD1 FUS down	-0.0739717	0.999968	non-significant	-0.14129	0.954513	non-significant	-1.64051	0.0054718	down	-0.644896	0.0231072	down
SHC2	ENSG00000129946	SOD1 FUS down	0.18844	0.999968	non-significant	-0.258399	0.925547	non-significant	-1.14717	0.00388938	down	-1.10718	0.00339492	down
PRRG3	ENSG00000130032	SOD1 FUS down	0.734742	0.999968	non-significant	-0.104966	0.985407	non-significant	-4.16716	0.00173715	down	-3.22996	0.00974349	down
DCLK1	ENSG00000133083	SOD1 FUS down	-0.578832	0.999968	non-significant	-0.677147	0.746766	non-significant	-1.3728	0.00039404	down	-2.11341	1.15709e-11	down
CHL1	ENSG00000134121	SOD1 FUS down	-1.93866	0.999968	non-significant	-1.36011	0.920547	non-significant	-6.31109	2.58613e-64	down	-2.4857	0.00137808	down
ANKRD6	ENSG00000135299	SOD1 FUS down	-0.484926	0.999968	non-significant	-0.927009	0.325465	non-significant	-1.50534	5.24358e-10	down	-0.814316	0.00932993	down
FAIM2	ENSG00000135472	SOD1 FUS down	0.443177	0.999968	non-significant	-1.1906	0.3342	non-significant	-4.37115	1.02583e-29	down	-1.44365	0.000439696	down
RAPGEF5	ENSG00000136237	SOD1 FUS down	0.23864	0.999968	non-significant	-1.12909	0.5476	non-significant	-5.18445	1.08082e-07	down	-2.22858	0.0114373	down
NACAD	ENSG00000136274	SOD1 FUS down	-0.371527	0.999968	non-significant	-0.268236	0.945648	non-significant	-1.02043	0.0217375	down	-1.24833	0.000570781	down
HS6ST1	ENSG00000136720	SOD1 FUS down	-0.301513	0.999968	non-significant	-2.15896	0.195913	non-significant	-1.23863	0.000492113	down	-1.00843	0.0116727	down
TMOD1	ENSG00000136842	SOD1 FUS down	0.465479	0.999968	non-significant	-2.97834	0.203201	non-significant	-3.72373	2.84704e-14	down	-1.68633	0.038309	down
GABBR2	ENSG00000136928	SOD1 FUS down	-0.454463	0.999968	non-significant	-0.0748544	0.985501	non-significant	-2.95301	3.49345e-06	down	-3.96409	5.91772e-07	down
TFAP2A	ENSG00000137203	SOD1 FUS down	0.604974	0.999968	non-significant	1.52783	0.732489	non-significant	-8.06653	0.00622758	down	-2.04474	0.00190884	down
SHISAL1	ENSG00000138944	SOD1 FUS down	-0.244205	0.999968	non-significant	0.317029	0.758295	non-significant	-3.96135	1.56006e-09	down	-1.21287	0.0312146	down
FGD4	ENSG00000139132	SOD1 FUS down	-0.830281	0.999968	non-significant	-1.93972	0.0621072	non-significant	-1.44703	0.0278027	down	-1.24652	0.0388016	down
RTN1	ENSG00000139970	SOD1 FUS down	-1.26355	0.999968	non-significant	0.57714	0.831005	non-significant	-2.37735	1.00373e-09	down	-1.2534	0.0143706	down
GNAL	ENSG00000141404	SOD1 FUS down	-0.184077	0.999968	non-significant	0.778464	0.574024	non-significant	-2.2258	4.72209e-06	down	-4.42065	2.57444e-10	down
IGFBP4	ENSG00000141753	SOD1 FUS down	0.540753	0.999968	non-significant	0.553452	0.673469	non-significant	-1.72766	0.000456359	down	-2.02813	2.64387e-08	down
ETNK2	ENSG00000143845	SOD1 FUS down	0.150753	0.999968	non-significant	0.414412	0.644858	non-significant	-1.24525	0.00726972	down	-0.49836	0.0452177	down
SYT2	ENSG00000143858	SOD1 FUS down	0.694497	0.999968	non-significant	-0.0764521	0.99199	non-significant	-6.2603	0.00365722	down	-3.25513	0.0211713	down
NSDHL	ENSG00000147383	SOD1 FUS down	-0.471411	0.999968	non-significant	-0.33601	0.860399	non-significant	-1.07881	0.00451197	down	-0.808483	1.67806e-08	down
FBXO10	ENSG00000147912	SOD1 FUS down	0.231578	0.999968	non-significant	-0.192265	0.946977	non-significant	-0.721957	0.0229691	down	-0.875702	0.00802688	down
TENM4	ENSG00000149256	SOD1 FUS down	-0.760501	0.999968	non-significant	-1.49565	0.428978	non-significant	-1.64863	0.0116608	down	-1.82626	0.0284569	down
GPR158	ENSG00000151025	SOD1 FUS down	0.71683	0.999968	non-significant	-0.729785	0.507064	non-significant	-3.17233	0.000403877	down	-4.57349	0.00229588	down
CCDC3	ENSG00000151468	SOD1 FUS down	0.954163	0.999968	non-significant	-2.40509	0.135638	non-significant	-1.01614	0.024545	down	-1.56432	0.00762531	down
ZSCAN1	ENSG00000152467	SOD1 FUS down	-0.541358	0.999968	non-significant	-1.44846	0.222477	non-significant	-2.97838	0.012359	down	-1.47134	0.0171892	down
CMIP	ENSG00000153815	SOD1 FUS down	0.0352365	0.999968	non-significant	0.588095	0.499281	non-significant	-1.38569	1.49994e-07	down	-1.80473	3.7504e-05	down
ROBO3	ENSG00000154134	SOD1 FUS down	-0.212369	0.999968	non-significant	0.999433	0.232833	non-significant	-4.03117	0.00138143	down	-0.878022	0.0100027	down
RAB6B	ENSG00000154917	SOD1 FUS down	-0.421852	0.999968	non-significant	-0.135808	0.967358	non-significant	-1.61823	0.000122725	down	-1.21712	0.0246301	down
EPHB1	ENSG00000154928	SOD1 FUS down	-0.0992651	0.999968	non-significant	-0.995787	0.250829	non-significant	-2.5878	2.62265e-14	down	-1.46369	0.0433281	down
DBI	ENSG00000155368	SOD1 FUS down	-0.56907	0.999968	non-significant	-0.701522	0.561718	non-significant	-0.695169	0.0288008	down	-0.610719	0.000305125	down
SPAG17	ENSG00000155761	SOD1 FUS down	-1.39531	0.999968	non-significant	1.08166	0.539524	non-significant	-0.984469	0.0190357	down	-2.62761	0.0350731	down
NMNAT2	ENSG00000157064	SOD1 FUS down	-0.701843	0.999968	non-significant	-0.862383	0.782128	non-significant	-1.96183	5.68767e-09	down	-3.34192	3.85645e-07	down
KIT	ENSG00000157404	SOD1 FUS down	0.124091	0.999968	non-significant	0.413629	0.915818	non-significant	-5.41316	1.27059e-13	down	-1.49592	1.96333e-08	down
PWWP3B	ENSG00000157502	SOD1 FUS down	-0.536403	0.999968	non-significant	4.49576	2.20905e-08	up	-4.78412	0.0172836	down	-1.91386	8.31053e-06	down
AGAP1	ENSG00000157985	SOD1 FUS down	-0.061591	0.999968	non-significant	-0.608569	0.703085	non-significant	-1.1863	0.000836926	down	-1.09905	0.00173256	down
FAM131B	ENSG00000159784	SOD1 FUS down	0.0719566	0.999968	non-significant	-0.378132	0.851593	non-significant	-2.83522	2.16204e-14	down	-0.749856	0.00922893	down
PDE9A	ENSG00000160191	SOD1 FUS down	-0.802707	0.999968	non-significant	-1.00407	0.194036	non-significant	-1.37903	0.000861706	down	-1.23396	3.40292e-05	down
KCNF1	ENSG00000162975	SOD1 FUS down	1.24419	0.999968	non-significant	-1.59487	0.0984415	non-significant	-4.25878	1.37558e-06	down	-3.64589	7.4614e-13	down
SERPINI1	ENSG00000163536	SOD1 FUS down	-0.328307	0.999968	non-significant	0.783688	0.534921	non-significant	-3.95101	9.18683e-08	down	-2.41549	1.65136e-05	down
PPM1L	ENSG00000163590	SOD1 FUS down	-0.348013	0.999968	non-significant	-1.16232	0.174732	non-significant	-0.965673	0.0338497	down	-1.6229	0.00463014	down
BSN	ENSG00000164061	SOD1 FUS down	0.310155	0.999968	non-significant	-0.639412	0.702781	non-significant	-2.26516	1.29308e-19	down	-1.2396	0.0130105	down
NDST3	ENSG00000164100	SOD1 FUS down	0.877666	0.999968	non-significant	3.13583	0.0355626	up	-4.46175	1.11452e-07	down	-1.54677	0.000543162	down
KBTBD6	ENSG00000165572	SOD1 FUS down	-0.173103	0.999968	non-significant	-0.392055	0.741841	non-significant	-0.734329	0.0226091	down	-0.435481	0.0238486	down
TC2N	ENSG00000165929	SOD1 FUS down	-1.42452	0.999968	non-significant	-1.07813	0.739901	non-significant	-2.73861	1.57765e-10	down	-3.17273	3.13704e-05	down
ZNF667-AS1	ENSG00000166770	SOD1 FUS down	0.138831	0.999968	non-significant	1.34348	0.373361	non-significant	-5.01611	2.72843e-10	down	-9.53875	7.30173e-27	down
MVD	ENSG00000167508	SOD1 FUS down	-0.474481	0.999968	non-significant	-0.603858	0.718455	non-significant	-1.59117	0.00250713	down	-0.639888	0.0366967	down
SCN11A	ENSG00000168356	SOD1 FUS down	-0.985044	0.999968	non-significant	-0.54797	0.857967	non-significant	-2.36356	0.0154786	down	-3.20565	0.0219081	down
PHYHIP	ENSG00000168490	SOD1 FUS down	-0.94215	0.999968	non-significant	-1.63687	0.0731746	non-significant	-1.6847	0.000415005	down	-1.56714	0.0388016	down
TSPAN5	ENSG00000168785	SOD1 FUS down	-0.191863	0.999968	non-significant	-0.29841	0.920362	non-significant	-0.550184	0.0348474	down	-0.85174	0.00419671	down
RAB3B	ENSG00000169213	SOD1 FUS down	-1.45095	0.999968	non-significant	1.69673	0.000146629	up	-4.41255	1.66905e-13	down	-1.41186	8.60107e-05	down
LDB2	ENSG00000169744	SOD1 FUS down	-0.552251	0.999968	non-significant	-1.55191	0.563399	non-significant	-3.78013	4.73192e-11	down	-2.29879	3.32979e-08	down
LINGO1	ENSG00000169783	SOD1 FUS down	-0.405109	0.999968	non-significant	-1.88675	0.175961	non-significant	-4.60714	1.36917e-24	down	-1.98958	4.77055e-06	down
SYT9	ENSG00000170743	SOD1 FUS down	0.560931	0.999968	non-significant	0.985106	0.763194	non-significant	-1.65739	0.0195918	down	-2.97214	0.000451316	down
MAP6	ENSG00000171533	SOD1 FUS down	-0.759999	0.999968	non-significant	-0.24214	0.947916	non-significant	-0.536433	0.0302598	down	-1.05769	0.0304713	down
NBEA	ENSG00000172915	SOD1 FUS down	-0.365216	0.999968	non-significant	-0.0578411	0.983005	non-significant	-0.922029	0.0188979	down	-0.846975	0.0251445	down
ZCCHC12	ENSG00000174460	SOD1 FUS down	-0.580898	0.999968	non-significant	-2.45584	0.093196	non-significant	-1.28307	0.000581101	down	-2.733	4.61111e-05	down
BAIAP2	ENSG00000175866	SOD1 FUS down	-0.481986	0.999968	non-significant	-0.654976	0.304839	non-significant	-1.04092	6.11624e-05	down	-0.701681	3.79316e-05	down
LRRTM4	ENSG00000176204	SOD1 FUS down	-0.0799695	0.999968	non-significant	-0.169088	0.97459	non-significant	-3.10796	1.80626e-12	down	-1.25218	0.00393615	down
BASP1	ENSG00000176788	SOD1 FUS down	-0.28098	0.999968	non-significant	1.32571	0.261387	non-significant	-1.33074	6.72022e-05	down	-0.961301	0.0282856	down
SRRM3	ENSG00000177679	SOD1 FUS down	0.603914	0.999968	non-significant	-1.54281	0.457538	non-significant	-2.65162	1.82162e-07	down	-2.84724	1.01315e-06	down
DDX10	ENSG00000178105	SOD1 FUS down	-0.217241	0.999968	non-significant	-0.837069	0.18821	non-significant	-0.991582	0.030978	down	-0.790689	0.0407784	down
MAB21L1	ENSG00000180660	SOD1 FUS down	-0.411402	0.999968	non-significant	-1.83597	0.289835	non-significant	-3.36259	0.00376384	down	-2.52464	0.00887763	down
PENK	ENSG00000181195	SOD1 FUS down	0.385369	0.999968	non-significant	4.81769	NA	non-significant	-3.14983	0.0266268	down	-5.09497	3.64168e-09	down
PLCXD3	ENSG00000182836	SOD1 FUS down	-1.17283	0.999968	non-significant	0.609344	0.849917	non-significant	-0.902108	0.0235194	down	-4.51919	9.07364e-14	down
PNMA3	ENSG00000183837	SOD1 FUS down	-0.231591	0.999968	non-significant	-0.263693	0.941961	non-significant	-5.88066	4.68241e-09	down	-1.24345	0.0242833	down
KCNQ3	ENSG00000184156	SOD1 FUS down	-0.443106	0.999968	non-significant	3.02937	0.00681436	up	-5.9612	0.000153774	down	-2.45614	0.00430362	down
HS6ST3	ENSG00000185352	SOD1 FUS down	-0.496556	0.999968	non-significant	-0.23739	0.970494	non-significant	-3.64534	5.69704e-06	down	-3.06595	8.55016e-06	down
IFIT1	ENSG00000185745	SOD1 FUS down	-1.0896	0.999968	non-significant	-0.449749	0.855576	non-significant	-1.16506	0.00107853	down	-0.833406	0.000906011	down
H1-0	ENSG00000189060	SOD1 FUS down	-0.303232	0.999968	non-significant	-1.25904	0.691088	non-significant	-1.99516	1.11628e-05	down	-0.729647	2.46337e-06	down
ZNF471	ENSG00000196263	SOD1 FUS down	0.228054	0.999968	non-significant	-0.0131191	0.994709	non-significant	-6.35286	1.28704e-48	down	-1.45262	0.00261125	down
NUDT11	ENSG00000196368	SOD1 FUS down	-0.512113	0.999968	non-significant	-0.645936	0.534321	non-significant	-0.973162	0.0365134	down	-0.874948	6.04905e-05	down
SPTSSB	ENSG00000196542	SOD1 FUS down	-1.01049	0.999968	non-significant	0.973198	NA	non-significant	-2.62461	0.00217948	down	-4.41147	4.1001e-05	down
ZFP28	ENSG00000196867	SOD1 FUS down	0.0118473	0.999968	non-significant	-0.705621	0.352433	non-significant	-2.86576	1.20074e-11	down	-0.71368	0.00425355	down
FAM49A	ENSG00000197872	SOD1 FUS down	-0.141142	0.999968	non-significant	-0.0754416	0.975802	non-significant	-0.857964	0.0186508	down	-1.87876	0.00368305	down
ZNF71	ENSG00000197951	SOD1 FUS down	0.0932048	0.999968	non-significant	-0.447588	0.652246	non-significant	-0.776689	0.0419801	down	-0.998448	1.95572e-07	down
ZNF667	ENSG00000198046	SOD1 FUS down	0.233935	0.999968	non-significant	-0.0624546	0.97497	non-significant	-3.81669	1.78085e-06	down	-8.82433	5.01715e-20	down
DLL1	ENSG00000198719	SOD1 FUS down	-0.661555	0.999968	non-significant	-0.8425	0.113294	non-significant	-0.85919	0.00737765	down	-2.57743	0.00110017	down
GRIN3A	ENSG00000198785	SOD1 FUS down	0.826894	0.999968	non-significant	0.863303	NA	non-significant	-6.54807	0.000309693	down	-2.56067	0.000381833	down
SREBF2	ENSG00000198911	SOD1 FUS down	-0.347788	0.999968	non-significant	-0.38696	0.795797	non-significant	-1.3066	2.22708e-08	down	-0.567781	2.78201e-07	down
PCDHA4	ENSG00000204967	SOD1 FUS down	0.30324	0.999968	non-significant	-0.692205	0.451019	non-significant	-1.08503	0.00791601	down	-0.676017	0.000242562	down
ATP6V1G2	ENSG00000213760	SOD1 FUS down	-0.281328	0.999968	non-significant	0.158887	0.935532	non-significant	-1.05939	0.00304544	down	-1.0288	0.000451316	down
BASP1-AS1	ENSG00000215196	SOD1 FUS down	-0.738005	0.999968	non-significant	0.987797	0.624442	non-significant	-5.1799	4.62539e-05	down	-2.25011	0.00923278	down
UBE2QL1	ENSG00000215218	SOD1 FUS down	-0.37874	0.999968	non-significant	-0.266694	0.940362	non-significant	-5.55392	2.65798e-17	down	-1.56016	0.000119587	down
CUTALP	ENSG00000226752	SOD1 FUS down	0.603267	0.999968	non-significant	0.36355	0.858903	non-significant	-4.3463	4.70171e-15	down	-1.5364	3.17867e-14	down
MIR4500HG	ENSG00000228824	SOD1 FUS down	-0.808004	0.999968	non-significant	-0.929631	0.864528	non-significant	-4.9585	0.00125508	down	-1.44472	0.00562498	down
FAR2P4	ENSG00000231431	SOD1 FUS down	-2.56642	0.999968	non-significant	-0.459872	0.929213	non-significant	-1.72278	0.0195879	down	-2.31689	0.0306038	down
PEG10	ENSG00000242265	SOD1 FUS down	-0.794602	0.999968	non-significant	-0.782111	0.444918	non-significant	-1.16737	0.00132765	down	-2.50133	7.88976e-06	down
TUNAR	ENSG00000250366	SOD1 FUS down	-0.752928	0.999968	non-significant	-1.53301	0.468093	non-significant	-1.08401	0.00274199	down	-2.09671	0.0135266	down
RTL1	ENSG00000254656	SOD1 FUS down	-1.29153	0.999968	non-significant	-1.76723	0.714016	non-significant	-3.2145	5.60272e-05	down	-4.5547	1.26169e-10	down
DIO3OS	ENSG00000258498	SOD1 FUS down	-1.55249	0.999968	non-significant	-3.90407	0.128115	non-significant	-5.16506	3.0615e-27	down	-4.86204	8.78315e-07	down
FRRS1L	ENSG00000260230	SOD1 FUS down	-0.737993	0.999968	non-significant	-0.547302	0.87623	non-significant	-2.66464	8.57105e-06	down	-1.88636	0.000567061	down
SPON1	ENSG00000262655	SOD1 FUS down	0.819484	0.999968	non-significant	-2.91426	0.266651	non-significant	-3.73395	3.38107e-62	down	-2.5801	1.13482e-06	down
NUDT3	ENSG00000272325	SOD1 FUS down	-0.513065	0.999968	non-significant	-1.05239	0.177067	non-significant	-0.907378	0.000688081	down	-0.248696	0.00421876	down
DGCR9	ENSG00000273032	SOD1 FUS down	-0.316988	0.999968	non-significant	-0.303151	0.89143	non-significant	-1.40245	0.0117286	down	-2.60908	0.000269153	down
AL121929.3	ENSG00000273108	SOD1 FUS down	-0.515371	0.999968	non-significant	-2.12758	NA	non-significant	-2.29963	0.009243	down	-3.38168	0.0363819	down
AC055839.2	ENSG00000286190	SOD1 FUS down	-0.815437	0.999968	non-significant	-1.0555	0.123954	non-significant	-0.962	0.0401612	down	-2.32488	6.5967e-12	down
GABRA4	ENSG00000109158	SOD1 FUS down	-5.51409	NA	non-significant	-0.624831	NA	non-significant	-5.45187	0.0209229	down	-5.18354	5.84992e-05	down
TMEM132D	ENSG00000151952	None	-10.2429	1.08215e-21	down	1.27571	0.474203	non-significant	0.189871	0.861364	non-significant	0.134462	0.668834	non-significant
FAM107A	ENSG00000168309	None	-4.81422	2.04826e-20	down	0.443038	0.926304	non-significant	1.4217	7.56947e-05	up	-1.12227	0.250615	non-significant
SLC15A4	ENSG00000139370	None	-11.4414	2.40589e-18	down	-0.267363	0.859235	non-significant	-0.577831	0.198011	non-significant	0.361526	0.0994014	non-significant
CHCHD2	ENSG00000106153	None	7.60828	1.41616e-11	up	-0.794188	0.408407	non-significant	2.14884	0.497659	non-significant	-2.09131	7.00321e-08	down
F8A3	ENSG00000277150	None	5.74716	1.16887e-10	up	1.0909	0.39583	non-significant	-5.79831	0.322404	non-significant	-0.503588	0.268988	non-significant
CSAG3	ENSG00000268916	None	4.74768	2.15052e-09	up	6.04067	NA	non-significant	-1.72115	NA	non-significant	NA	NA	non-significant
FOXG1	ENSG00000176165	None	-8.47459	4.64037e-09	down	-2.02375	0.586345	non-significant	-1.29895	NA	non-significant	1.35573	0.127839	non-significant
LSP1P4	ENSG00000143429	None	-4.21439	1.65383e-08	down	0.75357	0.313826	non-significant	0.214584	0.896214	non-significant	-0.709413	0.249544	non-significant
AMIGO3	ENSG00000176020	None	-10.7507	2.43801e-08	down	0.634142	0.979658	non-significant	6.09845	0.0992791	non-significant	-0.176751	0.944575	non-significant
TMEM132C	ENSG00000181234	None	-10.7264	2.43801e-08	down	-3.49391	0.635715	non-significant	-8.16116	0.0792593	non-significant	-0.0773088	0.969353	non-significant
IL21-AS1	ENSG00000227145	None	-4.79363	2.30285e-07	down	-1.20619	0.854364	non-significant	4.83854	0.00624372	up	NA	NA	non-significant
LINC01551	ENSG00000186960	None	-7.86489	2.18948e-06	down	-0.861131	0.877667	non-significant	-1.90292	NA	non-significant	0.282682	0.9002	non-significant
FMOD	ENSG00000122176	None	4.85866	2.35326e-06	up	1.15823	NA	non-significant	-0.187155	NA	non-significant	-5.28239	6.43533e-06	down
REC8	ENSG00000100918	None	-2.72327	2.79385e-06	down	-0.338501	0.867766	non-significant	0.204472	0.833247	non-significant	-0.938422	0.261409	non-significant
SLC34A2	ENSG00000157765	None	-3.23186	4.71241e-06	down	-1.85293	0.117673	non-significant	-0.312545	0.579596	non-significant	0.455748	0.893507	non-significant
FAM224B	ENSG00000230663	None	-10.4056	5.30439e-06	down	1.81559	NA	non-significant	NA	NA	non-significant	4.65044	0.27405	non-significant
GLT1D1	ENSG00000151948	None	-9.88629	5.74948e-06	down	-0.506968	0.872643	non-significant	-1.75392	0.0710723	non-significant	-1.58467	0.181022	non-significant
BMS1P12	ENSG00000224599	None	-9.5365	5.9801e-06	down	-1.18875	0.543262	non-significant	-3.79355	NA	non-significant	3.84183	0.42945	non-significant
FENDRR	ENSG00000268388	None	6.40515	5.9801e-06	up	0.810347	NA	non-significant	-0.469164	NA	non-significant	0.0389407	NA	non-significant
RNA5-8SN1	ENSG00000278189	None	-10.2105	6.75265e-06	down	0.45553	0.986294	non-significant	NA	NA	non-significant	0.367461	0.954412	non-significant
MAGEA2	ENSG00000268606	None	5.40149	1.1321e-05	up	3.77755	0.0840343	non-significant	0.345665	NA	non-significant	NA	NA	non-significant
PI15	ENSG00000137558	None	-4.58378	1.50473e-05	down	0.0320883	0.992557	non-significant	-1.18513	0.594098	non-significant	4.2372	0.00101223	up
FOXL2NB	ENSG00000206262	None	3.64169	3.2101e-05	up	2.0453	0.066488	non-significant	-0.591434	0.82041	non-significant	-0.136431	0.971681	non-significant
EIF3EP1	ENSG00000234882	None	-9.06241	3.2101e-05	down	NA	NA	non-significant	-1.10146	0.482223	non-significant	-0.412715	0.861633	non-significant
CU633906.2	ENSG00000275496	None	-4.00826	5.84531e-05	down	-3.82245	0.137683	non-significant	-5.43416	0.343923	non-significant	0.953138	0.885582	non-significant
OTX2	ENSG00000165588	None	-7.55686	9.31919e-05	down	0.583029	0.94232	non-significant	4.36388	6.41139e-07	up	0.180373	0.94624	non-significant
AC108704.2	ENSG00000279500	None	-8.22084	0.000128004	down	-0.657162	0.660514	non-significant	-0.426629	0.677983	non-significant	0.636869	0.562589	non-significant
C4orf54	ENSG00000248713	None	2.8157	0.000129959	up	-0.12424	0.978836	non-significant	1.61099	NA	non-significant	-0.204346	NA	non-significant
HLA-DQA2	ENSG00000237541	None	-5.49286	0.000154632	down	-4.67352	0.0906072	non-significant	-2.88575	0.348806	non-significant	-0.7651	NA	non-significant
TEK	ENSG00000120156	None	-2.83803	0.000161029	down	-0.504528	0.838548	non-significant	4.01929	6.94771e-11	up	-0.492831	0.71289	non-significant
GP1BB	ENSG00000203618	None	-24.4833	0.000161029	down	0.867571	0.287184	non-significant	-1.65952	0.0954759	non-significant	1.39024	0.631128	non-significant
CNPY1	ENSG00000146910	None	9.3942	0.000172904	up	-3.41842	0.837351	non-significant	-1.77094	NA	non-significant	-4.2272	2.38056e-09	down
MAGEA2B	ENSG00000183305	None	4.86669	0.000199874	up	3.20901	0.649434	non-significant	NA	NA	non-significant	NA	NA	non-significant
GABRB2	ENSG00000145864	None	-5.4318	0.00020783	down	1.31886	0.719893	non-significant	-6.72094	0.137002	non-significant	-0.658249	0.65187	non-significant
AC058822.1	ENSG00000282278	None	9.28737	0.000219673	up	-3.68064	0.5773	non-significant	0.81786	NA	non-significant	-0.490049	0.945875	non-significant
ASPN	ENSG00000106819	None	5.20737	0.000238558	up	0.0855627	0.991916	non-significant	2.59887	0.0540283	non-significant	0.656933	0.679426	non-significant
GJA5	ENSG00000265107	None	8.54915	0.000238558	up	5.21865	0.0668638	non-significant	4.25541	NA	non-significant	0.374844	NA	non-significant
PWAR5	ENSG00000279192	None	-23.8682	0.000255118	down	NA	NA	non-significant	-0.296216	0.86567	non-significant	-4.7334	0.121265	non-significant
DLX3	ENSG00000064195	None	3.31505	0.000452562	up	0.735564	NA	non-significant	1.65385	NA	non-significant	-2.22924	NA	non-significant
C6orf223	ENSG00000181577	None	-3.84081	0.000472846	down	0.174503	0.977397	non-significant	0.927517	NA	non-significant	-1.13641	0.658448	non-significant
C3orf80	ENSG00000180044	None	2.46636	0.000507492	up	-0.0479146	0.994709	non-significant	-0.970257	0.743738	non-significant	1.19408	0.347401	non-significant
AC007325.2	ENSG00000277196	None	-2.37773	0.000626867	down	-1.70099	0.334341	non-significant	1.11498	0.00835379	up	0.543875	0.846686	non-significant
AC055717.1	ENSG00000251536	None	-8.63983	0.000730388	down	0.464615	0.937689	non-significant	-0.211979	NA	non-significant	1.38718	NA	non-significant
SIRPB1	ENSG00000101307	None	6.01544	0.000785522	up	-1.98629	0.686774	non-significant	NA	NA	non-significant	-3.62994	0.0579799	non-significant
AC063938.1	ENSG00000241754	None	-8.47101	0.000785522	down	2.77407	NA	non-significant	1.15349	NA	non-significant	-1.0664	NA	non-significant
FEZF1-AS1	ENSG00000230316	None	-4.21796	0.000800998	down	2.03851	NA	non-significant	-0.0179723	0.996067	non-significant	2.62329	NA	non-significant
KRT81	ENSG00000205426	None	2.75007	0.000802696	up	1.59862	0.862219	non-significant	1.56498	NA	non-significant	0.798255	0.308717	non-significant
MAFIP	ENSG00000274847	None	22.5269	0.000815541	up	NA	NA	non-significant	NA	NA	non-significant	-4.19837	0.0851005	non-significant
TLX1	ENSG00000107807	None	8.2015	0.00083603	up	-1.80421	NA	non-significant	-0.9577	NA	non-significant	0.519832	NA	non-significant
TG	ENSG00000042832	None	3.21528	0.00107657	up	0.297167	0.958743	non-significant	0.152775	NA	non-significant	-1.50063	0.3466	non-significant
AC007424.1	ENSG00000257501	None	-6.05209	0.00169388	down	1.0925	0.868439	non-significant	9.03413	2.22085e-14	up	-0.10834	0.972044	non-significant
CDH1	ENSG00000039068	None	-2.2211	0.00171818	down	-0.148471	0.979658	non-significant	-0.541898	0.792061	non-significant	-0.939388	0.592936	non-significant
AC241377.4	ENSG00000281741	None	5.38348	0.00251367	up	7.66846	0.126313	non-significant	-0.561539	0.931537	non-significant	0.831653	0.844248	non-significant
PRDM16-DT	ENSG00000177133	None	-4.45752	0.00256741	down	-0.0564234	0.990914	non-significant	0.251832	0.881412	non-significant	0.218496	0.923313	non-significant
AC211486.6	ENSG00000273598	None	-7.93343	0.00264338	down	NA	NA	non-significant	-3.40751	NA	non-significant	2.61136	NA	non-significant
CSAG2	ENSG00000268902	None	7.80071	0.00280002	up	2.0366	0.723208	non-significant	NA	NA	non-significant	NA	NA	non-significant
HOXB9	ENSG00000170689	None	4.33227	0.0029947	up	3.00918	NA	non-significant	-8.31334	0.00181341	down	1.79918	NA	non-significant
ABI3BP	ENSG00000154175	None	-2.86301	0.00356958	down	3.33051	0.00389729	up	-0.41588	0.826998	non-significant	1.87975	0.239045	non-significant
PTPRN	ENSG00000054356	None	3.10056	0.00471924	up	0.573307	0.747138	non-significant	-3.52369	0.00026655	down	-0.32311	0.728398	non-significant
FOXF1	ENSG00000103241	None	4.61831	0.00579819	up	-1.23365	0.849917	non-significant	-3.91996	NA	non-significant	-1.8339	0.442488	non-significant
SUSD2	ENSG00000099994	None	-2.22397	0.00593093	down	1.44002	0.352177	non-significant	2.17137	2.87504e-05	up	0.849453	0.524787	non-significant
FP565260.2	ENSG00000276612	None	8.0293	0.00594542	up	NA	NA	non-significant	NA	NA	non-significant	NA	NA	non-significant
DUXAP8	ENSG00000206195	None	5.9494	0.0070223	up	1.00029	0.788711	non-significant	-2.90095	NA	non-significant	2.01954	NA	non-significant
ARX	ENSG00000004848	None	-3.37895	0.00702581	down	2.29307	0.658454	non-significant	1.07687	0.251587	non-significant	-2.92455	0.0776377	non-significant
AC091812.1	ENSG00000231317	None	5.08854	0.00715012	up	0.56768	0.957697	non-significant	NA	NA	non-significant	NA	NA	non-significant
ONECUT1	ENSG00000169856	None	3.61646	0.00720107	up	1.41143	NA	non-significant	-8.19816	0.000702326	down	0.831354	0.775569	non-significant
FOXP2	ENSG00000128573	None	-2.81471	0.00803169	down	0.275658	0.955277	non-significant	-1.25469	0.339493	non-significant	-0.420275	0.621223	non-significant
AL139260.3	ENSG00000274944	None	-8.65771	0.0081538	down	0.34092	0.83686	non-significant	0.653408	0.862032	non-significant	-0.109834	0.931579	non-significant
SCIN	ENSG00000006747	None	-3.29267	0.00817655	down	-1.91654	0.126313	non-significant	-1.86828	0.400487	non-significant	1.63991	0.458166	non-significant
PCDHGA3	ENSG00000254245	None	-5.31094	0.0083945	down	1.84789	0.322107	non-significant	1.04746	0.128793	non-significant	-1.23369	0.585105	non-significant
AQP4-AS1	ENSG00000260372	None	-4.63304	0.00902383	down	-0.385145	0.946977	non-significant	0.862497	0.397397	non-significant	-2.9431	NA	non-significant
CYBA	ENSG00000051523	None	-3.24245	0.0100556	down	1.93235	0.12309	non-significant	-4.00091	NA	non-significant	0.702372	0.11908	non-significant
FOXG1-AS1	ENSG00000257126	None	-8.40439	0.0107819	down	0.601762	0.945648	non-significant	0.345665	NA	non-significant	-0.921859	NA	non-significant
SLC22A3	ENSG00000146477	None	4.80333	0.0109319	up	2.05298	0.418264	non-significant	-2.64797	0.178506	non-significant	-1.77781	0.0052704	down
LINC01081	ENSG00000268754	None	7.66523	0.0122566	up	1.53672	0.825439	non-significant	NA	NA	non-significant	0.519832	NA	non-significant
KCNJ13	ENSG00000115474	None	-3.76477	0.0122938	down	-0.191438	NA	non-significant	1.00494	0.681518	non-significant	-0.492864	0.872682	non-significant
ANKRD20A2	ENSG00000183148	None	7.86621	0.0125415	up	-2.66211	NA	non-significant	1.31737	NA	non-significant	NA	NA	non-significant
CDH13	ENSG00000140945	None	-2.18399	0.0129215	down	-0.148646	0.973036	non-significant	1.10533	0.248369	non-significant	-1.14597	0.190426	non-significant
JPH3	ENSG00000154118	None	1.74721	0.0129215	up	-1.85468	0.438001	non-significant	-2.85514	6.04722e-05	down	0.776598	0.437649	non-significant
SLC35F3	ENSG00000183780	None	-3.42175	0.0129215	down	2.66765	0.0998319	non-significant	1.22623	0.29892	non-significant	-0.637434	0.741048	non-significant
SVIL-AS1	ENSG00000224597	None	-1.93777	0.0129215	down	-2.20342	0.769276	non-significant	-1.16367	0.436651	non-significant	0.483229	0.799697	non-significant
GPRC5D-AS1	ENSG00000247498	None	-5.50683	0.0136761	down	-1.40136	NA	non-significant	1.84112	0.26624	non-significant	-0.441953	NA	non-significant
BX088651.4	ENSG00000237357	None	2.07998	0.0149779	up	-0.885866	0.866756	non-significant	0.519571	0.881412	non-significant	0.639486	0.815221	non-significant
ANXA8	ENSG00000265190	None	6.89828	0.0176181	up	3.64977	0.165678	non-significant	NA	NA	non-significant	0.599142	NA	non-significant
FEZF2	ENSG00000153266	None	-5.97155	0.0177425	down	1.77859	NA	non-significant	-2.91361	NA	non-significant	NA	NA	non-significant
FKBP9P1	ENSG00000176826	None	2.65888	0.018661	up	0.635394	0.84748	non-significant	-2.54981	0.0949987	non-significant	1.75897	0.150957	non-significant
AL157400.5	ENSG00000249962	None	7.39944	0.0192064	up	-0.615652	0.78276	non-significant	2.2437	NA	non-significant	-1.22722	0.232387	non-significant
FST	ENSG00000134363	None	3.35887	0.0218069	up	2.35848	0.170589	non-significant	-2.92799	0.160483	non-significant	0.274236	0.800815	non-significant
RIBC2	ENSG00000128408	None	-3.52646	0.0221148	down	-0.695785	0.857952	non-significant	-0.0122443	0.996178	non-significant	-2.30561	0.162255	non-significant
IL20RB	ENSG00000174564	None	2.4626	0.0223322	up	0.445211	0.858903	non-significant	-0.375418	0.892013	non-significant	-0.0504389	0.981403	non-significant
C12orf54	ENSG00000177627	None	4.4198	0.0226798	up	2.51295	0.120792	non-significant	0.40083	NA	non-significant	1.27766	NA	non-significant
FGF7	ENSG00000140285	None	4.49017	0.0232714	up	0.871946	0.864528	non-significant	-2.34625	0.12289	non-significant	-0.161763	0.930036	non-significant
AC131180.1	ENSG00000285819	None	-6.71311	0.0233533	down	0.318364	0.975412	non-significant	-3.80953	0.160214	non-significant	3.40715	0.123682	non-significant
PCSK6	ENSG00000140479	None	-4.91308	0.0235816	down	-1.23491	0.331917	non-significant	0.563227	0.559454	non-significant	-0.74276	0.2623	non-significant
NF1P8	ENSG00000236956	None	-5.87357	0.0235816	down	-0.564858	0.974512	non-significant	-3.13314	0.413331	non-significant	1.25024	NA	non-significant
OR8S1	ENSG00000284723	None	7.9136	0.0279354	up	2.81344	NA	non-significant	4.89427	NA	non-significant	-1.80508	NA	non-significant
AC132872.4	ENSG00000280407	None	2.59137	0.0321146	up	2.19267	0.143273	non-significant	2.09081	NA	non-significant	0.602122	0.746957	non-significant
ADAMTS8	ENSG00000134917	None	2.43535	0.0337278	up	-0.00456493	0.99898	non-significant	1.51652	0.189855	non-significant	-1.37878	0.144409	non-significant
PRODH	ENSG00000100033	None	-2.08631	0.0352138	down	-1.90429	0.184197	non-significant	1.61574	0.000824098	up	-0.0688944	0.978685	non-significant
ANGPT1	ENSG00000154188	None	2.84342	0.0352138	up	-1.70606	0.182051	non-significant	-0.787217	0.301689	non-significant	-0.528546	0.119078	non-significant
AC130456.1	ENSG00000259871	None	-3.97843	0.0352138	down	0.810738	0.865753	non-significant	5.03918	0.0101394	up	-0.52034	0.803056	non-significant
AL671762.1	ENSG00000285565	None	-3.06275	0.0352138	down	0.79146	0.479555	non-significant	-0.179997	0.906298	non-significant	1.92191	0.752022	non-significant
CYP39A1	ENSG00000146233	None	-3.88031	0.0376564	down	2.87316	0.169156	non-significant	0.463982	0.820973	non-significant	-1.10319	0.382338	non-significant
USP43	ENSG00000154914	None	-1.58184	0.0402263	down	-0.131454	0.953807	non-significant	-0.294267	0.626264	non-significant	0.265382	0.76309	non-significant
AC130404.1	ENSG00000256085	None	-7.1391	0.0410013	down	-0.163323	0.979658	non-significant	0.353831	NA	non-significant	NA	NA	non-significant
AC097462.3	ENSG00000287021	None	-4.40513	0.0414758	down	1.90967	0.463082	non-significant	-0.913096	0.624653	non-significant	-1.37523	NA	non-significant
RNU1-1	ENSG00000206652	None	-4.98312	0.0422475	down	-0.273494	0.787078	non-significant	NA	NA	non-significant	-0.840858	0.852913	non-significant
HLA-DRB6	ENSG00000229391	None	-4.60754	0.0450759	down	-1.601	0.572862	non-significant	-1.72654	0.101533	non-significant	-2.23484	0.426206	non-significant
MIR924HG	ENSG00000267374	None	-3.8781	0.0461715	down	-2.89224	0.144492	non-significant	2.42997	0.0111545	up	0.709259	0.628161	non-significant
AL024495.1	ENSG00000286592	None	3.36213	0.0461715	up	2.62207	0.365426	non-significant	-2.93532	0.202484	non-significant	0.43654	NA	non-significant
IRS4	ENSG00000133124	None	-6.60821	0.0465538	down	-1.21657	NA	non-significant	-2.57041	NA	non-significant	-2.98662	NA	non-significant
KCNK1	ENSG00000135750	None	-3.70239	0.0466166	down	5.44726	0.000437758	up	0.532826	0.750627	non-significant	-0.437605	0.602094	non-significant
SFN	ENSG00000175793	None	-4.55432	0.047442	down	0.933928	0.697227	non-significant	5.61595	0.00237498	up	-1.85158	NA	non-significant
AL589743.1	ENSG00000244306	None	5.5047	0.047442	up	-1.43488	0.675261	non-significant	-1.05472	NA	non-significant	0.519832	NA	non-significant
GPR18	ENSG00000125245	None	2.72897	0.0476364	up	-0.427938	0.961572	non-significant	NA	NA	non-significant	3.11793	NA	non-significant
CCL2	ENSG00000108691	None	-1.93818	0.0514987	non-significant	1.3266	0.0610367	non-significant	2.58564	2.75748e-07	up	-0.705173	0.155847	non-significant
SOWAHB	ENSG00000186212	None	3.39774	0.0514987	non-significant	-0.230953	0.957087	non-significant	2.48055	0.233882	non-significant	0.894553	0.484838	non-significant
STOML3	ENSG00000133115	None	-4.46433	0.0515582	non-significant	-0.983063	0.736451	non-significant	0.302655	0.84355	non-significant	0.574102	0.710254	non-significant
PPARG	ENSG00000132170	None	2.70209	0.0523553	non-significant	4.26445	0.00127962	up	1.41322	NA	non-significant	-1.09967	0.15638	non-significant
ATP1A2	ENSG00000018625	None	-4.75828	0.0534551	non-significant	2.63568	0.00152867	up	-2.16245	9.80566e-05	down	-1.58618	0.0628136	non-significant
CHRNA3	ENSG00000080644	None	2.18724	0.0548602	non-significant	-0.109594	0.987075	non-significant	-1.32235	0.226197	non-significant	-3.36494	1.83678e-06	down
GABRB1	ENSG00000163288	None	-6.26482	0.0558069	non-significant	-0.74756	NA	non-significant	-3.86892	NA	non-significant	-0.912576	NA	non-significant
CHST9	ENSG00000154080	None	-4.75003	0.057466	non-significant	-2.38133	0.510816	non-significant	-3.07794	0.000443476	down	-1.60644	0.22002	non-significant
AC124856.1	ENSG00000268105	None	-7.22561	0.0582125	non-significant	-1.96938	0.238372	non-significant	-2.10473	NA	non-significant	-0.975633	NA	non-significant
FGF19	ENSG00000162344	None	-4.94882	0.0587842	non-significant	-7.84498	0.427527	non-significant	-7.44875	0.0100871	down	0.0389407	NA	non-significant
NKX3-2	ENSG00000109705	None	4.01978	0.0597402	non-significant	0.152386	0.986294	non-significant	-0.260911	NA	non-significant	-1.85465	0.0127473	down
ANXA8L1	ENSG00000264230	None	4.55497	0.0619617	non-significant	5.21329	0.343331	non-significant	NA	NA	non-significant	0.519832	NA	non-significant
ENPP1	ENSG00000197594	None	1.42192	0.062646	non-significant	-0.926106	0.456123	non-significant	-0.949007	0.310898	non-significant	-0.190426	0.69939	non-significant
MIR503HG	ENSG00000223749	None	1.60414	0.062646	non-significant	-0.151643	0.975412	non-significant	1.38991	0.288289	non-significant	1.41798	0.000572926	up
CHAC1	ENSG00000128965	None	2.42898	0.0666206	non-significant	0.537101	0.871279	non-significant	0.0347184	0.980114	non-significant	1.3474	0.000334688	up
MNS1	ENSG00000138587	None	-1.48913	0.0666206	non-significant	-0.293754	0.849307	non-significant	0.0544397	0.967998	non-significant	0.125124	0.879344	non-significant
AC025283.2	ENSG00000285329	None	-3.70935	0.0675599	non-significant	1.35081	NA	non-significant	-1.794	NA	non-significant	-0.6498	NA	non-significant
LINC02487	ENSG00000203688	None	-4.64028	0.0678146	non-significant	-4.46954	0.0455306	down	-1.24122	NA	non-significant	1.51244	0.505036	non-significant
MYL4	ENSG00000198336	None	3.74886	0.069041	non-significant	0.0984614	0.988385	non-significant	-0.814963	NA	non-significant	4.38245	1.59873e-07	up
MYBPC1	ENSG00000196091	None	3.45969	0.0731033	non-significant	-1.81455	0.726684	non-significant	-5.36329	0.0205549	down	2.64254	NA	non-significant
LINC00623	ENSG00000226067	None	1.88457	0.073579	non-significant	1.29961	0.44916	non-significant	-1.16761	0.17242	non-significant	-0.321271	0.638045	non-significant
AL049839.2	ENSG00000273259	None	4.75198	0.073579	non-significant	2.0376	0.695469	non-significant	NA	NA	non-significant	-1.10648	0.687653	non-significant
AL132657.1	ENSG00000226578	None	6.87035	0.0738021	non-significant	1.06199	0.83145	non-significant	4.58196	NA	non-significant	-0.974215	NA	non-significant
COL4A6	ENSG00000197565	None	-2.22646	0.0772573	non-significant	0.258423	0.955277	non-significant	2.53427	6.31223e-16	up	-1.98968	9.57141e-11	down
NPR3	ENSG00000113389	None	-4.2228	0.0778366	non-significant	2.8576	0.0124005	up	1.55597	0.0563218	non-significant	0.733585	0.496385	non-significant
PDE5A	ENSG00000138735	None	-4.16274	0.0798708	non-significant	1.24451	0.775812	non-significant	-1.76365	0.322273	non-significant	0.320111	0.794089	non-significant
ISL1	ENSG00000016082	None	-7.29298	0.0799177	non-significant	1.36705	NA	non-significant	0.58796	NA	non-significant	0.269588	0.891731	non-significant
AC027612.1	ENSG00000223703	None	-3.89717	0.0800833	non-significant	1.31716	0.0644225	non-significant	-2.49705	NA	non-significant	-0.578579	NA	non-significant
RN7SL1	ENSG00000276168	None	-1.43551	0.0812055	non-significant	0.0424109	0.985407	non-significant	0.020929	0.99414	non-significant	-1.08632	0.000288975	down
INHBE	ENSG00000139269	None	3.40829	0.0820345	non-significant	2.56105	0.177067	non-significant	2.28346	0.315423	non-significant	4.46969	9.44866e-28	up
FEZF1	ENSG00000128610	None	-2.74647	0.0822581	non-significant	2.81071	NA	non-significant	0.42096	0.906428	non-significant	1.99942	NA	non-significant
F12	ENSG00000131187	None	1.67513	0.0822581	non-significant	-1.50006	0.27883	non-significant	-0.525647	0.781349	non-significant	0.0671137	0.965803	non-significant
NUTM2E	ENSG00000228570	None	3.47164	0.0822581	non-significant	0.748474	0.934535	non-significant	0.912178	0.857338	non-significant	-0.04004	0.992556	non-significant
AC105052.3	ENSG00000267645	None	-1.99911	0.0822581	non-significant	0.367431	0.845192	non-significant	1.60386	0.203421	non-significant	0.944953	8.85291e-05	up
TMEM191B	ENSG00000278558	None	2.13325	0.0822581	non-significant	0.291743	0.94232	non-significant	-2.69483	0.102783	non-significant	-2.72258	0.0317095	down
COL4A3	ENSG00000169031	None	-5.32675	0.0847717	non-significant	5.32686	0.00760711	up	1.21632	NA	non-significant	-0.0194103	0.995603	non-significant
XIST	ENSG00000229807	None	10.1274	0.0866239	non-significant	-0.306576	0.988385	non-significant	1.02213	0.458609	non-significant	-2.64802	NA	non-significant
HOXA11	ENSG00000005073	None	5.38279	0.0869525	non-significant	-2.51498	NA	non-significant	NA	NA	non-significant	1.00073	NA	non-significant
PRDM16	ENSG00000142611	None	-3.44357	0.0873579	non-significant	-1.13049	0.632333	non-significant	-0.230246	0.887611	non-significant	0.870205	0.587644	non-significant
COL3A1	ENSG00000168542	None	2.99865	0.0873579	non-significant	3.17409	0.148141	non-significant	5.92212	1.1347e-26	up	-0.455666	0.0608828	non-significant
CDH5	ENSG00000179776	None	-3.5684	0.0895009	non-significant	2.51485	0.3876	non-significant	2.05194	NA	non-significant	6.15027	0.000185496	up
TMEM176A	ENSG00000002933	None	4.63288	0.0905648	non-significant	-3.08754	NA	non-significant	-2.46436	NA	non-significant	0.613844	NA	non-significant
ACTA1	ENSG00000143632	None	2.75876	0.0905648	non-significant	0.942389	0.798177	non-significant	-0.514458	0.857617	non-significant	2.75786	0.0011439	up
LRRC34	ENSG00000171757	None	-2.61795	0.0905648	non-significant	0.593103	0.817092	non-significant	-1.25575	0.124752	non-significant	0.186032	0.911354	non-significant
LINC01391	ENSG00000244578	None	6.05672	0.0905648	non-significant	0.36607	NA	non-significant	0.345665	NA	non-significant	0.519832	NA	non-significant
GDF10	ENSG00000266524	None	-3.05013	0.0916691	non-significant	0.906281	0.943529	non-significant	4.04688	0.00565826	up	-0.442793	0.761595	non-significant
OSCAR	ENSG00000170909	None	3.63077	0.0927015	non-significant	-0.668303	0.893626	non-significant	-0.251465	NA	non-significant	0.48181	NA	non-significant
NR2E1	ENSG00000112333	None	-2.94959	0.0947941	non-significant	-1.83924	0.553289	non-significant	2.22663	0.231944	non-significant	NA	NA	non-significant
AVPR1A	ENSG00000166148	None	-5.23527	0.0947941	non-significant	-0.082043	0.99199	non-significant	-0.430438	NA	non-significant	1.22491	0.652961	non-significant
AL671883.2	ENSG00000271581	None	2.2682	0.0947941	non-significant	0.127836	0.982363	non-significant	0.111577	NA	non-significant	2.70429	NA	non-significant
GLRA2	ENSG00000101958	None	-3.29475	0.0955133	non-significant	-1.52365	NA	non-significant	-4.46295	3.76333e-08	down	-0.817234	NA	non-significant
FUT9	ENSG00000172461	None	-2.45822	0.099068	non-significant	-2.42816	0.204087	non-significant	-6.9262	7.51172e-28	down	0.0505091	0.982236	non-significant
TNFAIP8L3	ENSG00000183578	None	3.52014	0.099068	non-significant	0.599869	0.887542	non-significant	-0.66145	0.808555	non-significant	0.476066	NA	non-significant
LDHA	ENSG00000134333	None	1.66887	0.0994589	non-significant	1.27742	0.0131828	up	-0.246313	0.724812	non-significant	0.556835	0.314063	non-significant
CCDC148	ENSG00000153237	None	-2.34394	0.100308	non-significant	0.910602	0.43085	non-significant	0.318805	0.812396	non-significant	0.259633	0.802991	non-significant
MXRA5	ENSG00000101825	None	2.26334	0.102394	non-significant	1.65836	0.161599	non-significant	4.08207	3.06499e-25	up	-0.58604	0.122377	non-significant
MTRNR2L8	ENSG00000255823	None	4.45231	0.103647	non-significant	NA	NA	non-significant	-0.433305	NA	non-significant	-0.924163	NA	non-significant
AC008764.4	ENSG00000268790	None	-7.36715	0.103647	non-significant	4.6572	0.238372	non-significant	2.75159	NA	non-significant	1.94121	NA	non-significant
SLC18A3	ENSG00000187714	None	3.5408	0.106501	non-significant	-2.36902	0.641097	non-significant	-2.46913	NA	non-significant	1.99666	0.170096	non-significant
ZP3	ENSG00000188372	None	3.1513	0.110491	non-significant	-1.4037	0.669677	non-significant	1.13364	0.592605	non-significant	-5.53418	7.00538e-13	down
ITGB3	ENSG00000259207	None	1.48758	0.113214	non-significant	0.312421	0.896871	non-significant	0.998659	0.269012	non-significant	1.84513	3.2033e-05	up
CLEC19A	ENSG00000261210	None	-3.49349	0.113214	non-significant	0.590239	0.643181	non-significant	5.53089	5.8612e-05	up	-1.21788	0.099544	non-significant
AC104692.2	ENSG00000270405	None	6.69624	0.113214	non-significant	NA	NA	non-significant	-1.33752	NA	non-significant	NA	NA	non-significant
ODAPH	ENSG00000174792	None	2.36851	0.11646	non-significant	3.59268	0.0986264	non-significant	-2.57578	0.355216	non-significant	7.05138	1.172e-09	up
LINC02282	ENSG00000257056	None	-7.10145	0.120978	non-significant	-1.11946	NA	non-significant	NA	NA	non-significant	1.00073	NA	non-significant
AC090192.2	ENSG00000253227	None	3.90962	0.121892	non-significant	-4.16931	0.0767687	non-significant	1.90817	NA	non-significant	-1.51086	0.388209	non-significant
HAVCR2	ENSG00000135077	None	2.33831	0.124005	non-significant	0.870489	0.679942	non-significant	-2.99397	0.179129	non-significant	1.33185	0.319099	non-significant
ROS1	ENSG00000047936	None	3.14688	0.124067	non-significant	1.33404	0.738905	non-significant	NA	NA	non-significant	-0.420118	0.908225	non-significant
KIAA1211L	ENSG00000196872	None	1.73863	0.124067	non-significant	2.16042	0.00128504	up	0.656732	0.564172	non-significant	-2.0864	0.0161633	down
SFTA1P	ENSG00000225383	None	-3.33532	0.124067	non-significant	1.28651	0.341522	non-significant	-0.122791	0.971843	non-significant	0.826906	0.507734	non-significant
LMO7-AS1	ENSG00000261105	None	4.08207	0.124067	non-significant	2.76658	0.665124	non-significant	1.90817	NA	non-significant	2.18478	0.0621649	non-significant
AC016590.4	ENSG00000286449	None	6.6554	0.124067	non-significant	-1.17424	0.803083	non-significant	-3.08115	NA	non-significant	1.00073	NA	non-significant
CDH10	ENSG00000040731	None	-1.72205	0.125032	non-significant	0.373768	0.931449	non-significant	-4.92061	1.8579e-19	down	-0.512326	0.304848	non-significant
BMS1P8	ENSG00000260518	None	-4.64766	0.125379	non-significant	-0.157852	0.968498	non-significant	0.423562	0.810936	non-significant	1.79276	0.214891	non-significant
L3MBTL2-AS1	ENSG00000235513	None	2.16818	0.130622	non-significant	0.691945	0.805451	non-significant	-1.12388	0.603347	non-significant	1.9865	1.41542e-08	up
AC006064.6	ENSG00000285238	None	-4.46908	0.132058	non-significant	0.682244	0.832386	non-significant	-2.08699	0.522936	non-significant	0.210721	0.953931	non-significant
RNF43	ENSG00000108375	None	-2.48631	0.1323	non-significant	2.60775	0.71126	non-significant	2.33494	0.000584549	up	-1.56662	0.16481	non-significant
AC126407.1	ENSG00000260978	None	-4.8999	0.1323	non-significant	-1.29419	NA	non-significant	-3.48683	NA	non-significant	NA	NA	non-significant
WNT2	ENSG00000105989	None	4.81088	0.132686	non-significant	6.66821	5.19239e-07	up	2.99573	NA	non-significant	0.448307	0.761595	non-significant
AC011297.1	ENSG00000273906	None	-7.68878	0.145808	non-significant	-3.70956	0.25447	non-significant	-2.99877	NA	non-significant	1.556	NA	non-significant
URB1-AS1	ENSG00000256073	None	-1.91144	0.146138	non-significant	-0.259009	0.929103	non-significant	-1.36716	0.586605	non-significant	-2.80379	0.0025744	down
PSPHP1	ENSG00000226278	None	5.77168	0.146509	non-significant	-0.854191	0.972942	non-significant	-1.55612	0.648604	non-significant	-1.72689	NA	non-significant
GDF15	ENSG00000130513	None	2.79513	0.149047	non-significant	0.537381	0.845326	non-significant	0.0385089	0.993047	non-significant	0.55319	0.527384	non-significant
GIPC3	ENSG00000179855	None	1.60169	0.149047	non-significant	-1.59822	0.653902	non-significant	NA	NA	non-significant	-0.694723	0.758098	non-significant
MIR210HG	ENSG00000247095	None	2.14577	0.149714	non-significant	1.55897	0.0991391	non-significant	-0.0338153	0.985591	non-significant	2.35655	1.91481e-06	up
AC068234.1	ENSG00000259753	None	6.90816	0.149714	non-significant	0.502935	0.976557	non-significant	-0.559106	NA	non-significant	-4.85025	0.109848	non-significant
LURAP1L	ENSG00000153714	None	1.82986	0.150218	non-significant	0.642735	0.841659	non-significant	-0.970458	0.226919	non-significant	0.979354	0.234415	non-significant
ROR1-AS1	ENSG00000223949	None	3.24936	0.152362	non-significant	1.80677	0.614631	non-significant	0.345665	NA	non-significant	0.217593	NA	non-significant
AC017053.1	ENSG00000234275	None	-4.57022	0.152362	non-significant	-2.60515	NA	non-significant	NA	NA	non-significant	0.519832	NA	non-significant
SYT6	ENSG00000134207	None	1.67645	0.156776	non-significant	3.65405	0.000130612	up	-0.470165	0.725954	non-significant	-2.49207	0.0167601	down
KRT6A	ENSG00000205420	None	-7.37663	0.157988	non-significant	5.1331	NA	non-significant	NA	NA	non-significant	-4.55307	0.295265	non-significant
PI4KAP1	ENSG00000274602	None	1.50907	0.158099	non-significant	0.115852	0.979658	non-significant	0.908404	0.0519829	non-significant	-0.736061	0.00173555	down
SLC9C2	ENSG00000162753	None	-3.51597	0.160626	non-significant	-1.70237	0.477281	non-significant	0.180716	0.889796	non-significant	-2.06898	NA	non-significant
EMX2	ENSG00000170370	None	-9.65604	0.160626	non-significant	-0.196004	NA	non-significant	-2.05615	NA	non-significant	-4.17219	0.000490561	down
SYCP2	ENSG00000196074	None	-2.20287	0.160626	non-significant	0.215095	0.965843	non-significant	2.39776	0.198631	non-significant	-1.49905	0.272025	non-significant
SIRPAP1	ENSG00000225774	None	2.70825	0.160626	non-significant	0.649517	NA	non-significant	2.96276	NA	non-significant	-0.291186	0.891731	non-significant
AC010616.1	ENSG00000285505	None	-6.72938	0.160626	non-significant	-2.21868	0.0135327	down	-4.89843	0.152589	non-significant	1.64143	NA	non-significant
DDIT4L	ENSG00000145358	None	-3.9203	0.163652	non-significant	3.46045	0.17203	non-significant	0.586775	0.708225	non-significant	-1.78114	0.00532054	down
ASB9	ENSG00000102048	None	-1.93214	0.165031	non-significant	-1.84693	NA	non-significant	0.974347	0.698078	non-significant	-3.58141	0.000613083	down
CFAP46	ENSG00000171811	None	-2.64548	0.165078	non-significant	-0.429743	0.78028	non-significant	-0.0246165	0.983839	non-significant	-0.351213	0.69035	non-significant
SMPDL3B	ENSG00000130768	None	2.80103	0.166679	non-significant	0.894298	NA	non-significant	1.26011	NA	non-significant	-0.187898	0.929919	non-significant
RPL23AP87	ENSG00000232938	None	-3.96743	0.166679	non-significant	-3.08705	NA	non-significant	1.99394	NA	non-significant	-0.583624	0.883248	non-significant
TINAGL1	ENSG00000142910	None	2.07125	0.169791	non-significant	1.46124	0.670384	non-significant	2.24034	NA	non-significant	-3.48002	0.0794459	non-significant
EMX2OS	ENSG00000229847	None	-9.18368	0.172079	non-significant	0.516043	0.910017	non-significant	-2.62668	NA	non-significant	-5.06904	3.99365e-07	down
GDNF-AS1	ENSG00000248587	None	2.65654	0.173927	non-significant	1.90847	0.200775	non-significant	-2.98266	0.0865907	non-significant	2.50506	0.0263369	up
SLC1A2	ENSG00000110436	None	-2.18767	0.174361	non-significant	-0.961932	0.82192	non-significant	-0.487347	0.339539	non-significant	-0.31902	0.892628	non-significant
AC055717.3	ENSG00000280196	None	-6.61494	0.174665	non-significant	0.374915	NA	non-significant	NA	NA	non-significant	NA	NA	non-significant
CAMK2N2	ENSG00000163888	None	1.34724	0.180463	non-significant	0.398212	0.869167	non-significant	-1.53536	0.0474222	down	-0.0797534	0.905535	non-significant
SCG2	ENSG00000171951	None	2.27566	0.181831	non-significant	0.527177	0.680935	non-significant	-1.00809	0.139395	non-significant	-0.355134	0.515156	non-significant
AP002748.5	ENSG00000256349	None	6.57582	0.18713	non-significant	-0.108781	0.953163	non-significant	0.0116021	0.998376	non-significant	-0.751854	0.810033	non-significant
EYA2	ENSG00000064655	None	-4.4424	0.191044	non-significant	0.958331	NA	non-significant	-0.130491	0.935997	non-significant	-0.441953	NA	non-significant
LINC02126	ENSG00000259847	None	6.51316	0.192522	non-significant	1.18283	NA	non-significant	NA	NA	non-significant	1.50481	NA	non-significant
TSPAN9	ENSG00000011105	None	-1.24414	0.1937	non-significant	1.21226	0.0866925	non-significant	1.55936	0.000209282	up	-0.267327	0.0884678	non-significant
GRIN2C	ENSG00000161509	None	1.78716	0.194227	non-significant	0.826206	0.690999	non-significant	-0.188379	0.955711	non-significant	0.654709	NA	non-significant
NPIPA8	ENSG00000214940	None	9.35052	0.201379	non-significant	4.19155	0.0565192	non-significant	1.64282	NA	non-significant	-3.92222	0.276395	non-significant
MYHAS	ENSG00000272975	None	6.01938	0.203702	non-significant	2.95343	NA	non-significant	NA	NA	non-significant	NA	NA	non-significant
DLX5	ENSG00000105880	None	-3.13867	0.206397	non-significant	-1.80928	NA	non-significant	-3.60623	NA	non-significant	-2.46407	0.138109	non-significant
AC134669.1	ENSG00000265118	None	6.58465	0.210572	non-significant	NA	NA	non-significant	NA	NA	non-significant	0.707659	NA	non-significant
INSM2	ENSG00000168348	None	-7.40023	0.21617	non-significant	-3.3948	NA	non-significant	-3.72002	NA	non-significant	NA	NA	non-significant
AC009237.6	ENSG00000235959	None	-6.47375	0.217823	non-significant	-7.48509	0.00696508	down	2.7758	NA	non-significant	0.357973	NA	non-significant
PATJ	ENSG00000132849	None	-1.49273	0.218876	non-significant	0.39375	0.845817	non-significant	-1.34208	0.0822465	non-significant	-1.8915	0.000179984	down
CGB8	ENSG00000213030	None	1.78488	0.218876	non-significant	0.735424	0.932606	non-significant	NA	NA	non-significant	1.66411	NA	non-significant
RSPO1	ENSG00000169218	None	-4.24131	0.218933	non-significant	2.7017	NA	non-significant	1.90817	NA	non-significant	-1.27215	NA	non-significant
SGCD	ENSG00000170624	None	3.19845	0.222143	non-significant	3.34956	0.00630523	up	-3.33433	0.00181197	down	-0.499981	0.0857417	non-significant
LINC02298	ENSG00000257556	None	1.85496	0.222143	non-significant	1.56253	0.184329	non-significant	1.58346	0.435721	non-significant	1.25427	0.316758	non-significant
C1orf94	ENSG00000142698	None	3.06503	0.223626	non-significant	-4.50939	0.242054	non-significant	-4.55817	0.0238329	down	0.519832	NA	non-significant
SLC25A27	ENSG00000153291	None	-1.39579	0.223626	non-significant	1.54293	0.12562	non-significant	-1.01774	0.108052	non-significant	-0.638815	0.334844	non-significant
AL390800.1	ENSG00000286099	None	-4.71898	0.223626	non-significant	2.81797	0.367825	non-significant	2.42435	0.216867	non-significant	NA	NA	non-significant
OMD	ENSG00000127083	None	2.46784	0.227315	non-significant	0.741617	NA	non-significant	6.67935	5.67438e-05	up	-2.36896	0.0102388	down
SRPX	ENSG00000101955	None	1.70497	0.229402	non-significant	-0.494718	0.775812	non-significant	1.60129	0.0417007	up	-0.720178	0.020247	down
ALOX5AP	ENSG00000132965	None	3.12952	0.229929	non-significant	4.90294	2.14414e-05	up	2.69097	NA	non-significant	1.74196	0.216265	non-significant
LTK	ENSG00000062524	None	1.48253	0.230593	non-significant	-3.39912	0.0505286	non-significant	-1.42522	0.622859	non-significant	1.37258	0.611229	non-significant
AL451136.1	ENSG00000288208	None	-6.5254	0.232518	non-significant	-0.0155259	0.996708	non-significant	-2.25805	NA	non-significant	3.2101	NA	non-significant
SYT4	ENSG00000132872	None	1.73402	0.234128	non-significant	-7.90014	0.0663613	non-significant	-7.02829	1.32367e-36	down	2.59296	0.000603246	up
RPL23AP60	ENSG00000213147	None	-6.42733	0.236712	non-significant	NA	NA	non-significant	NA	NA	non-significant	NA	NA	non-significant
SLC2A1	ENSG00000117394	None	1.32735	0.239744	non-significant	0.918457	0.67636	non-significant	-1.3536	0.181501	non-significant	1.00162	0.0539966	non-significant
SERTM1	ENSG00000180440	None	-2.69953	0.239744	non-significant	3.49249	0.00592309	up	0.610367	0.357121	non-significant	-2.75445	0.00263543	down
HTR7	ENSG00000148680	None	2.51959	0.241519	non-significant	0.910952	0.757061	non-significant	-4.58114	0.0436765	down	0.90943	0.306858	non-significant
MPPED2	ENSG00000066382	None	-2.65788	0.24251	non-significant	-1.92403	0.204834	non-significant	-4.54118	0.000127477	down	-0.0522907	0.981148	non-significant
HMGCLL1	ENSG00000146151	None	-3.60688	0.24251	non-significant	-4.61639	0.563399	non-significant	-3.41238	0.000172515	down	-0.671248	0.549494	non-significant
LINC01358	ENSG00000237352	None	3.28933	0.24684	non-significant	0.276143	0.980492	non-significant	-0.490415	NA	non-significant	-0.962069	0.686363	non-significant
DIO2	ENSG00000211448	None	-4.07007	0.251992	non-significant	1.73659	0.459436	non-significant	1.02962	0.596453	non-significant	0.653911	0.647278	non-significant
AC006062.1	ENSG00000287171	None	2.63321	0.252907	non-significant	2.6194	NA	non-significant	3.3439	NA	non-significant	3.52555	0.0177436	up
BMP3	ENSG00000152785	None	-6.38131	0.257801	non-significant	0.369895	NA	non-significant	-2.0687	0.428875	non-significant	-0.441953	NA	non-significant
CASQ1	ENSG00000143318	None	-2.50519	0.259346	non-significant	1.11114	0.403743	non-significant	-4.00151	0.00231555	down	0.114182	0.947664	non-significant
DUXAP9	ENSG00000225210	None	5.10807	0.259801	non-significant	5.10214	0.0913989	non-significant	-0.430438	NA	non-significant	NA	NA	non-significant
LINC01239	ENSG00000234840	None	1.78075	0.262503	non-significant	1.2278	0.360771	non-significant	1.03842	0.634081	non-significant	0.8747	0.27177	non-significant
AC093791.2	ENSG00000286321	None	-7.00252	0.262503	non-significant	0.689772	0.891609	non-significant	NA	NA	non-significant	1.77777	NA	non-significant
AL136981.4	ENSG00000288271	None	2.61244	0.263602	non-significant	5.89794	NA	non-significant	-3.06374	0.131567	non-significant	1.00073	NA	non-significant
DCDC2	ENSG00000146038	None	-2.62607	0.264565	non-significant	0.623769	0.778981	non-significant	1.79133	2.35399e-08	up	0.294063	0.783236	non-significant
GTF2H2B	ENSG00000226259	None	1.32607	0.270325	non-significant	-0.730625	0.638268	non-significant	1.19455	0.0584751	non-significant	1.98513	0.00422534	up
SLC8A2	ENSG00000118160	None	1.29392	0.272914	non-significant	-2.12556	0.243593	non-significant	-5.37485	0.000201785	down	-0.819782	NA	non-significant
ERICH3	ENSG00000178965	None	-4.2752	0.272914	non-significant	-3.11004	0.112186	non-significant	0.219625	0.878403	non-significant	-0.443844	NA	non-significant
LINC01266	ENSG00000224957	None	-6.44653	0.275047	non-significant	3.15086	0.787162	non-significant	-0.169849	NA	non-significant	0.205179	0.92434	non-significant
ZNF703	ENSG00000183779	None	1.72876	0.275326	non-significant	0.519724	0.914105	non-significant	0.254397	0.730182	non-significant	-0.177626	0.825493	non-significant
PDE4D	ENSG00000113448	None	-1.76642	0.277251	non-significant	-0.126419	0.944528	non-significant	-0.0169007	0.98616	non-significant	-0.348255	0.515759	non-significant
ANKUB1	ENSG00000206199	None	-2.92625	0.279282	non-significant	-1.91524	0.394371	non-significant	1.418	0.0791551	non-significant	0.174004	NA	non-significant
AC103740.1	ENSG00000259370	None	1.81266	0.279716	non-significant	1.41159	0.83157	non-significant	4.04784	0.0122458	up	-0.0429088	0.983399	non-significant
KCND2	ENSG00000184408	None	-3.40516	0.279899	non-significant	-3.57546	0.106906	non-significant	-5.96145	1.21951e-08	down	-1.56238	0.176741	non-significant
LRRC7	ENSG00000033122	None	-1.46305	0.283617	non-significant	1.73967	0.589223	non-significant	-0.439506	0.539515	non-significant	-0.882354	0.106103	non-significant
CIITA	ENSG00000179583	None	-2.20043	0.284338	non-significant	-1.97149	0.0998965	non-significant	-0.0789724	0.956347	non-significant	-2.03252	0.0935506	non-significant
CAVIN2	ENSG00000168497	None	-4.36864	0.28486	non-significant	3.54415	0.00907916	up	1.09905	NA	non-significant	-1.31593	2.67388e-05	down
RIMBP3C	ENSG00000183246	None	-6.33043	0.28486	non-significant	-0.517781	0.87393	non-significant	1.84048	NA	non-significant	0.150109	0.955643	non-significant
NEK2P4	ENSG00000230450	None	-4.48454	0.28486	non-significant	-0.808065	0.860844	non-significant	-2.55831	0.248679	non-significant	0.519838	NA	non-significant
FBXL21P	ENSG00000164616	None	2.74281	0.285216	non-significant	2.75413	0.293451	non-significant	0.61068	0.819295	non-significant	1.15562	0.45401	non-significant
CLVS2	ENSG00000146352	None	-3.32143	0.285824	non-significant	-5.24388	0.271599	non-significant	-7.82073	2.46926e-19	down	-0.436089	0.722254	non-significant
AC099494.2	ENSG00000279415	None	3.50498	0.285824	non-significant	1.75119	NA	non-significant	-0.446026	NA	non-significant	-0.0823504	0.974508	non-significant
SPINK1	ENSG00000164266	None	2.36576	0.286369	non-significant	3.79276	0.00983388	up	4.44014	NA	non-significant	2.87709	NA	non-significant
AQP4	ENSG00000171885	None	-3.95513	0.286369	non-significant	-1.52225	0.604507	non-significant	0.0530119	0.94177	non-significant	-3.13301	0.00936362	down
OSTM1-AS1	ENSG00000225174	None	-4.5985	0.286369	non-significant	1.81259	NA	non-significant	2.37715	NA	non-significant	NA	NA	non-significant
AC078883.1	ENSG00000225205	None	2.47299	0.286369	non-significant	1.88154	0.0748482	non-significant	0.284123	NA	non-significant	1.66339	0.221034	non-significant
AC027031.2	ENSG00000254615	None	1.31011	0.286369	non-significant	-1.02322	0.607055	non-significant	-0.58967	0.294843	non-significant	0.862286	0.0912519	non-significant
RIPOR2	ENSG00000111913	None	-1.60907	0.288991	non-significant	-0.638813	0.545927	non-significant	1.46552	0.0161839	up	-1.00931	1.29816e-05	down
AC106743.1	ENSG00000287106	None	6.92594	0.289019	non-significant	2.36932	NA	non-significant	NA	NA	non-significant	NA	NA	non-significant
CD74	ENSG00000019582	None	-2.57532	0.290784	non-significant	-1.62839	0.326698	non-significant	-0.530729	0.563049	non-significant	-1.68127	0.127963	non-significant
CFAP57	ENSG00000243710	None	-2.90752	0.290784	non-significant	0.0829794	0.980492	non-significant	-0.327487	0.793902	non-significant	0.897549	0.621835	non-significant
U91328.1	ENSG00000272462	None	2.36871	0.291071	non-significant	0.669366	0.801688	non-significant	-3.43166	0.106038	non-significant	-0.532591	0.646195	non-significant
SYNPO2L	ENSG00000166317	None	1.5991	0.293334	non-significant	0.0968947	0.98649	non-significant	0.919675	0.672867	non-significant	-1.33407	NA	non-significant
LINC01116	ENSG00000163364	None	2.09499	0.294425	non-significant	1.00761	0.83145	non-significant	-0.253219	NA	non-significant	-0.694275	0.690608	non-significant
UNC5B	ENSG00000107731	None	1.64505	0.2961	non-significant	0.807555	0.771509	non-significant	0.21736	0.770861	non-significant	0.48084	0.0493959	up
AC100803.3	ENSG00000261655	None	2.99767	0.2961	non-significant	-0.888226	NA	non-significant	-4.0871	0.151307	non-significant	-2.85009	0.0876058	non-significant
CLUL1	ENSG00000079101	None	-2.60931	0.298437	non-significant	0.753681	0.898378	non-significant	1.52724	0.09697	non-significant	-1.09441	0.323408	non-significant
NPPA	ENSG00000175206	None	3.08093	0.298437	non-significant	-4.89091	0.0353706	down	-1.2622	NA	non-significant	NA	NA	non-significant
AC011632.1	ENSG00000253706	None	1.72979	0.298437	non-significant	-1.53217	0.568118	non-significant	-0.0489423	0.985504	non-significant	2.91007	0.282019	non-significant
TMEM176B	ENSG00000106565	None	2.78143	0.300315	non-significant	-6.64558	0.127078	non-significant	-2.31168	0.295415	non-significant	-2.04324	NA	non-significant
LINC01252	ENSG00000247157	None	1.77387	0.300421	non-significant	-0.497612	0.940362	non-significant	1.18994	0.607603	non-significant	1.83056	0.156495	non-significant
LINC01711	ENSG00000268941	None	2.04782	0.302554	non-significant	2.1521	0.0200399	up	3.48124	0.0943546	non-significant	-0.157735	0.877524	non-significant
AMBN	ENSG00000178522	None	-5.86315	0.303426	non-significant	-3.06633	NA	non-significant	-2.93288	NA	non-significant	NA	NA	non-significant
AC136944.2	ENSG00000261200	None	-3.24189	0.304158	non-significant	-1.04349	NA	non-significant	-0.153833	0.915319	non-significant	0.196898	0.948141	non-significant
ERP27	ENSG00000139055	None	-3.92229	0.304422	non-significant	-4.77267	NA	non-significant	-4.26428	0.0713397	non-significant	-0.811591	0.511722	non-significant
NEGR1	ENSG00000172260	None	-1.77235	0.304422	non-significant	2.88683	0.0829796	non-significant	-4.99129	1.80383e-30	down	1.38683	0.0591633	non-significant
CPN2	ENSG00000178772	None	3.13484	0.30735	non-significant	2.49304	NA	non-significant	0.345665	NA	non-significant	2.15451	NA	non-significant
NQO2-AS1	ENSG00000224846	None	-3.42193	0.30735	non-significant	-0.784089	0.769345	non-significant	-1.4349	NA	non-significant	4.86071	0.00247075	up
AC078881.1	ENSG00000250131	None	-2.60831	0.307552	non-significant	1.87094	0.0543316	non-significant	-1.48286	0.500972	non-significant	0.689946	0.74699	non-significant
AC213203.2	ENSG00000275405	None	6.67592	0.309662	non-significant	-0.356788	0.668883	non-significant	-1.7714	NA	non-significant	-0.974292	NA	non-significant
NPY5R	ENSG00000164129	None	2.57546	0.310173	non-significant	-1.38096	0.869624	non-significant	-7.28323	0.000199587	down	-2.22068	0.190471	non-significant
AL445430.2	ENSG00000242753	None	4.51383	0.311667	non-significant	-2.077	NA	non-significant	NA	NA	non-significant	NA	NA	non-significant
BMP7	ENSG00000101144	None	-1.76214	0.314018	non-significant	-2.81341	0.00528299	down	0.247769	0.820497	non-significant	-0.954401	0.39631	non-significant
AC010136.1	ENSG00000223923	None	-3.44672	0.314018	non-significant	-0.935512	0.894092	non-significant	2.41758	NA	non-significant	0.191955	0.949679	non-significant
NKX2-1-AS1	ENSG00000253563	None	-6.69025	0.314018	non-significant	NA	NA	non-significant	2.33232	NA	non-significant	NA	NA	non-significant
AL139351.3	ENSG00000287335	None	1.8145	0.314018	non-significant	-0.459058	0.94303	non-significant	1.82012	NA	non-significant	0.195587	NA	non-significant
ENTPD3	ENSG00000168032	None	1.48938	0.314107	non-significant	-0.109802	0.981393	non-significant	-0.366437	0.851189	non-significant	0.232583	0.724765	non-significant
SIX3	ENSG00000138083	None	-3.70954	0.314147	non-significant	-1.46367	NA	non-significant	1.37998	0.507466	non-significant	-0.659039	0.572945	non-significant
AL645922.1	ENSG00000244255	None	-6.79491	0.320841	non-significant	NA	NA	non-significant	2.15377	0.359911	non-significant	-0.550885	0.892938	non-significant
IL18R1	ENSG00000115604	None	2.64017	0.32133	non-significant	-0.814172	0.909272	non-significant	0.198933	0.952971	non-significant	-1.59069	0.0173714	down
AC007563.2	ENSG00000236886	None	2.13757	0.32133	non-significant	2.32656	0.0386546	up	-0.430438	NA	non-significant	0.842621	NA	non-significant
CD247	ENSG00000198821	None	-3.41474	0.322364	non-significant	-0.31755	0.964713	non-significant	3.09655	0.20486	non-significant	-2.09353	NA	non-significant
SLC13A4	ENSG00000164707	None	-4.17417	0.326275	non-significant	3.0159	0.317542	non-significant	3.32085	0.12354	non-significant	-2.55858	0.000814367	down
ESRRG	ENSG00000196482	None	-1.8932	0.326275	non-significant	-2.69378	0.145731	non-significant	-1.06627	0.0222902	down	-0.0131402	0.994063	non-significant
AL513166.1	ENSG00000286863	None	-2.87397	0.327944	non-significant	2.25472	0.446083	non-significant	-1.65872	0.485975	non-significant	-0.452649	0.81556	non-significant
GATA2	ENSG00000179348	None	2.13737	0.328299	non-significant	-2.7226	0.0226251	down	-0.276877	0.876066	non-significant	-0.0759016	0.973057	non-significant
EPHA3	ENSG00000044524	None	1.5099	0.328938	non-significant	-2.42649	0.339989	non-significant	-0.942963	0.143302	non-significant	0.517306	0.399688	non-significant
CRYM	ENSG00000103316	None	-2.33927	0.329951	non-significant	-1.80421	0.529738	non-significant	-0.153909	0.97396	non-significant	4.8392	0.00187058	up
FOXA1	ENSG00000129514	None	2.67839	0.329951	non-significant	-4.29909	0.432314	non-significant	-0.297604	0.588476	non-significant	-2.59099	0.0130157	down
ROR2	ENSG00000169071	None	1.79407	0.329951	non-significant	3.81488	0.0111024	up	-0.816109	0.598694	non-significant	-1.34845	0.027167	down
CACNA1H	ENSG00000196557	None	1.5745	0.329951	non-significant	-0.815542	0.22004	non-significant	-2.37328	5.01736e-06	down	-0.682683	0.482273	non-significant
NPY2R	ENSG00000185149	None	-3.30909	0.33029	non-significant	-2.64845	0.766059	non-significant	2.7127	0.113781	non-significant	-0.279355	0.940548	non-significant
ZNF835	ENSG00000127903	None	2.17129	0.332753	non-significant	-0.900182	0.645179	non-significant	-4.60701	0.0570065	non-significant	-4.23946	0.0310242	down
LINC02688	ENSG00000254872	None	2.89137	0.332891	non-significant	1.00434	NA	non-significant	-1.76279	NA	non-significant	0.364464	NA	non-significant
PRRX2	ENSG00000167157	None	2.15892	0.333293	non-significant	1.76684	NA	non-significant	2.69649	0.160214	non-significant	-3.4414	0.000367141	down
RASD2	ENSG00000100302	None	2.67286	0.333616	non-significant	-1.56887	NA	non-significant	-1.0834	0.535413	non-significant	-1.48688	0.301461	non-significant
HSD17B3	ENSG00000130948	None	-3.54298	0.333616	non-significant	-1.27289	0.531685	non-significant	-1.74732	0.600584	non-significant	0.115909	NA	non-significant
LIMS4	ENSG00000256671	None	1.65301	0.333616	non-significant	2.07911	0.0709577	non-significant	-1.69485	NA	non-significant	-1.11726	0.793916	non-significant
LINC01186	ENSG00000236751	None	-1.95688	0.334448	non-significant	-0.414313	0.944396	non-significant	5.48091	1.09819e-05	up	-0.439767	0.919117	non-significant
KCNK3	ENSG00000171303	None	1.8991	0.334886	non-significant	0.0618061	0.989086	non-significant	-2.0083	0.0215705	down	2.13964	0.00622651	up
HLA-DPA1	ENSG00000231389	None	-2.34701	0.334886	non-significant	-2.84219	0.112886	non-significant	-2.15098	0.00176213	down	0.178409	0.914092	non-significant
LINC02302	ENSG00000258998	None	-5.63494	0.334886	non-significant	4.5124	0.0832008	non-significant	1.48918	NA	non-significant	-2.00581	0.184976	non-significant
APOD	ENSG00000189058	None	2.46837	0.33555	non-significant	-1.16963	0.829578	non-significant	1.90817	NA	non-significant	1.12805	0.0670102	non-significant
CNTN5	ENSG00000149972	None	-4.27584	0.33643	non-significant	2.00895	NA	non-significant	-3.70994	0.00965337	down	-0.302311	0.776335	non-significant
CDC42BPG	ENSG00000171219	None	-1.27724	0.336593	non-significant	-1.54477	0.225849	non-significant	-2.23301	0.163331	non-significant	0.192573	0.783237	non-significant
AC118758.3	ENSG00000279072	None	-3.35234	0.338556	non-significant	1.01048	NA	non-significant	0.593943	0.798661	non-significant	-1.11838	0.646485	non-significant
SELENBP1	ENSG00000143416	None	-1.39978	0.338592	non-significant	-0.0503012	0.994709	non-significant	-0.251702	0.815445	non-significant	-0.235984	0.822099	non-significant
IL31RA	ENSG00000164509	None	2.23746	0.338592	non-significant	1.58687	0.085916	non-significant	-0.252129	NA	non-significant	0.925021	0.0393118	up
FOXE1	ENSG00000178919	None	2.27239	0.338592	non-significant	1.87183	NA	non-significant	-1.44877	NA	non-significant	1.14784	0.648782	non-significant
ZIC2	ENSG00000043355	None	-4.00436	0.339378	non-significant	1.29115	0.93624	non-significant	0.678269	0.318614	non-significant	-1.6679	0.111071	non-significant
C12orf56	ENSG00000185306	None	-4.49663	0.339378	non-significant	0.223626	NA	non-significant	2.33232	NA	non-significant	0.978356	NA	non-significant
AL137060.3	ENSG00000274270	None	2.1901	0.339378	non-significant	-0.092506	0.983005	non-significant	-0.680698	NA	non-significant	1.08678	0.477509	non-significant
DCBLD1	ENSG00000164465	None	1.24806	0.339756	non-significant	1.34984	0.0925971	non-significant	0.499006	0.697494	non-significant	0.0109004	0.982873	non-significant
LANCL3	ENSG00000147036	None	-4.52113	0.340793	non-significant	2.44933	0.133006	non-significant	-4.40152	0.0522221	non-significant	-2.76896	0.000444636	down
HLA-DRA	ENSG00000204287	None	-2.7409	0.345537	non-significant	-1.84599	0.369663	non-significant	-1.19202	0.107374	non-significant	-0.990105	0.607492	non-significant
BCL11B	ENSG00000127152	None	-2.42363	0.35795	non-significant	-2.06557	0.0818988	non-significant	-3.46064	0.0148682	down	-0.0469531	0.974508	non-significant
POLR2J3	ENSG00000168255	None	-1.63104	0.358168	non-significant	0.255528	0.838825	non-significant	0.832187	0.513539	non-significant	0.837613	0.0136733	up
JCAD	ENSG00000165757	None	2.03485	0.359446	non-significant	3.56647	4.06841e-05	up	-0.412305	0.730908	non-significant	0.109378	0.869286	non-significant
GRM5	ENSG00000168959	None	-3.16568	0.359446	non-significant	0.702852	0.898378	non-significant	-4.60584	1.59253e-10	down	-0.185286	0.94342	non-significant
ENO4	ENSG00000188316	None	-2.56301	0.359446	non-significant	0.354145	0.83543	non-significant	-0.208384	0.869447	non-significant	-0.513623	0.562589	non-significant
HLA-DOA	ENSG00000204252	None	-2.9507	0.359446	non-significant	-3.13903	0.0657378	non-significant	-1.22257	0.508123	non-significant	-2.007	0.014248	down
AC002480.2	ENSG00000232949	None	-5.50163	0.359631	non-significant	-1.20446	NA	non-significant	-1.10243	NA	non-significant	2.22622	0.35246	non-significant
HLA-C	ENSG00000204525	None	1.76323	0.366773	non-significant	0.186067	0.970477	non-significant	-0.0139181	0.992391	non-significant	2.28946	3.33114e-29	up
KRT75	ENSG00000170454	None	-2.44531	0.367411	non-significant	-0.715696	0.910955	non-significant	NA	NA	non-significant	0.519832	NA	non-significant
DAW1	ENSG00000123977	None	-3.11625	0.367618	non-significant	-0.510859	0.834673	non-significant	0.374125	0.668385	non-significant	-0.556169	0.712854	non-significant
COL15A1	ENSG00000204291	None	2.14194	0.367981	non-significant	-0.284896	0.955774	non-significant	2.32642	0.092494	non-significant	1.47946	0.0536765	non-significant
AC138907.8	ENSG00000278950	None	-7.62254	0.367981	non-significant	-1.07593	NA	non-significant	-0.558413	NA	non-significant	-3.74781	0.0672986	non-significant
AC116366.3	ENSG00000283782	None	-1.25139	0.368308	non-significant	0.327858	0.918776	non-significant	0.0748591	0.96813	non-significant	0.025256	0.994063	non-significant
CD96	ENSG00000153283	None	2.33419	0.36838	non-significant	0.222337	0.970477	non-significant	2.41866	NA	non-significant	-0.684776	0.684222	non-significant
CFAP45	ENSG00000213085	None	-2.33424	0.36838	non-significant	1.24906	0.624442	non-significant	-0.240054	0.606262	non-significant	-0.207134	0.861633	non-significant
AC126755.7	ENSG00000285628	None	9.02585	0.36838	non-significant	-1.07628	0.894092	non-significant	-0.192164	0.963779	non-significant	-5.11901	0.00131531	down
MYB	ENSG00000118513	None	-3.19655	0.369854	non-significant	-3.21454	0.0162055	down	-0.645038	0.77557	non-significant	1.74448	0.125802	non-significant
ARHGAP9	ENSG00000123329	None	2.21172	0.369854	non-significant	0.908398	0.447219	non-significant	-1.40277	0.595429	non-significant	0.57636	0.72906	non-significant
TNFSF9	ENSG00000125657	None	2.20312	0.369854	non-significant	2.40264	0.133006	non-significant	-1.08106	0.670789	non-significant	1.48261	0.119079	non-significant
PTPRN2	ENSG00000155093	None	-2.68883	0.369854	non-significant	-3.49559	0.0886775	non-significant	-4.11602	4.26501e-20	down	-0.936607	0.133319	non-significant
AC109439.2	ENSG00000250284	None	7.6094	0.369854	non-significant	-0.0301535	NA	non-significant	1.19204	0.743255	non-significant	5.47379	6.29035e-07	up
MMP28	ENSG00000271447	None	2.86935	0.369854	non-significant	2.46336	0.184329	non-significant	0.581852	0.780293	non-significant	0.579815	0.760581	non-significant
RNA5-8SN5	ENSG00000274917	None	-7.60147	0.369854	non-significant	1.79756	0.894823	non-significant	NA	NA	non-significant	3.965	NA	non-significant
RNA5-8SN3	ENSG00000275215	None	-7.60147	0.369854	non-significant	0.445453	0.986417	non-significant	NA	NA	non-significant	-2.01544	NA	non-significant
AL353644.2	ENSG00000275757	None	-7.60147	0.369854	non-significant	0.458977	0.98604	non-significant	NA	NA	non-significant	-2.55711	0.653535	non-significant
FP671120.4	ENSG00000277739	None	-7.60147	0.369854	non-significant	0.341738	0.989092	non-significant	NA	NA	non-significant	NA	NA	non-significant
RNA5-8SN2	ENSG00000278233	None	-7.60147	0.369854	non-significant	1.55884	0.915882	non-significant	-0.836763	0.770086	non-significant	-3.2516	NA	non-significant
GRTP1	ENSG00000139835	None	-1.45915	0.37028	non-significant	0.102956	0.982988	non-significant	-0.821823	0.415703	non-significant	-1.23269	0.170673	non-significant
AFF2	ENSG00000155966	None	-1.11533	0.37207	non-significant	-1.13914	0.183634	non-significant	-1.04555	0.0859876	non-significant	0.698333	0.103395	non-significant
MOV10L1	ENSG00000073146	None	1.61195	0.375632	non-significant	0.709245	0.746881	non-significant	2.04167	0.0370397	up	0.180326	0.912255	non-significant
EPPIN	ENSG00000101448	None	-4.35949	0.375632	non-significant	0.180047	NA	non-significant	-0.343854	NA	non-significant	0.519832	NA	non-significant
GATA3	ENSG00000107485	None	2.31989	0.375632	non-significant	-0.713992	NA	non-significant	-3.31888	0.000204349	down	-0.956555	0.238586	non-significant
HTR2C	ENSG00000147246	None	-7.5801	0.375632	non-significant	NA	NA	non-significant	-0.430438	NA	non-significant	0.519832	NA	non-significant
TCERG1L	ENSG00000176769	None	-3.7511	0.375632	non-significant	1.28391	0.938938	non-significant	-3.06038	0.335826	non-significant	-4.68088	0.00401504	down
AC024940.2	ENSG00000177359	None	1.94833	0.375632	non-significant	-6.43537	0.0713363	non-significant	-2.09357	0.061484	non-significant	-0.364196	0.870875	non-significant
AC009299.1	ENSG00000225813	None	5.26831	0.375632	non-significant	NA	NA	non-significant	NA	NA	non-significant	NA	NA	non-significant
SNX19P3	ENSG00000264570	None	6.1386	0.375632	non-significant	1.5871	NA	non-significant	-1.98535	NA	non-significant	-1.1023	0.549134	non-significant
DDIT4-AS1	ENSG00000269926	None	3.38016	0.375632	non-significant	-0.445383	0.929829	non-significant	-0.523612	NA	non-significant	0.559225	NA	non-significant
AC099066.2	ENSG00000227496	None	1.44978	0.379828	non-significant	0.954161	0.376218	non-significant	3.47454	0.0710947	non-significant	0.534201	0.560981	non-significant
TENM1	ENSG00000009694	None	-1.43844	0.379935	non-significant	2.7662	0.0144226	up	-7.83331	1.79205e-13	down	1.12723	0.344273	non-significant
DEF6	ENSG00000023892	None	1.92117	0.379935	non-significant	0.710101	0.84096	non-significant	1.88469	0.165956	non-significant	-1.62186	0.137866	non-significant
C1QTNF1	ENSG00000173918	None	1.51211	0.386475	non-significant	0.800239	0.741322	non-significant	-1.77592	NA	non-significant	-0.655579	0.309038	non-significant
BMP2	ENSG00000125845	None	2.07102	0.386909	non-significant	-0.157277	0.973036	non-significant	4.21011	1.5363e-11	up	-0.628724	0.419948	non-significant
AL161431.1	ENSG00000275216	None	-2.42384	0.389077	non-significant	-1.86009	0.555704	non-significant	5.51257	0.00297446	up	-2.70674	0.240444	non-significant
ZBBX	ENSG00000169064	None	-1.80037	0.390907	non-significant	-0.881965	0.619904	non-significant	-0.0638498	0.929469	non-significant	-0.251097	0.881455	non-significant
DSC2	ENSG00000134755	None	-2.76234	0.391951	non-significant	3.98088	0.00214014	up	1.04508	0.277741	non-significant	0.42644	0.581217	non-significant
PAPPA-AS2	ENSG00000226604	None	2.30324	0.391951	non-significant	2.90397	0.0100721	up	1.45075	NA	non-significant	0.874097	0.697556	non-significant
AL035461.4	ENSG00000286235	None	-7.53638	0.391951	non-significant	NA	NA	non-significant	0.898943	0.307591	non-significant	NA	NA	non-significant
DES	ENSG00000175084	None	3.61248	0.396174	non-significant	0.943858	0.855046	non-significant	0.100884	NA	non-significant	2.12379	0.00136683	up
C11orf88	ENSG00000183644	None	-3.12204	0.396174	non-significant	-1.46993	0.595335	non-significant	1.2609	0.0700893	non-significant	-0.475823	NA	non-significant
ZNF730	ENSG00000183850	None	-3.27748	0.396174	non-significant	-1.23241	0.234076	non-significant	-0.868894	0.555797	non-significant	-1.30217	0.0345921	down
RNASEH2B-AS1	ENSG00000233672	None	3.15937	0.396174	non-significant	-0.012941	0.997115	non-significant	0.12369	0.970229	non-significant	0.917629	0.69647	non-significant
LHX8	ENSG00000162624	None	-3.79433	0.396308	non-significant	4.15958	NA	non-significant	NA	NA	non-significant	-2.05727	0.040662	down
LINC02207	ENSG00000258476	None	-6.10299	0.400443	non-significant	-2.01324	NA	non-significant	-1.89866	0.289985	non-significant	-0.595774	NA	non-significant
CCDC81	ENSG00000149201	None	-1.14323	0.401136	non-significant	-0.673758	0.79455	non-significant	0.113065	0.915309	non-significant	-2.53806	0.000193293	down
AL590617.2	ENSG00000225177	None	1.8977	0.407442	non-significant	0.725072	0.802235	non-significant	0.588791	0.674238	non-significant	0.747619	0.234506	non-significant
AL121757.1	ENSG00000230563	None	-6.37931	0.407671	non-significant	-1.03119	NA	non-significant	NA	NA	non-significant	NA	NA	non-significant
CCKAR	ENSG00000163394	None	2.53757	0.412017	non-significant	-0.186381	0.982988	non-significant	3.11707	0.0452616	up	0.0750717	NA	non-significant
EIF2S3B	ENSG00000180574	None	-2.59798	0.413681	non-significant	0.00332991	0.999105	non-significant	-0.197311	0.881412	non-significant	-5.34221	1.22323e-16	down
VEGFC	ENSG00000150630	None	1.49492	0.414706	non-significant	3.41623	0.000246399	up	-0.865651	0.520429	non-significant	-0.580864	0.0164966	down
PEAR1	ENSG00000187800	None	-3.3872	0.414706	non-significant	1.59094	0.786331	non-significant	-2.48534	NA	non-significant	-0.80542	0.58355	non-significant
LPAL2	ENSG00000213071	None	2.32491	0.418259	non-significant	0.385932	0.917888	non-significant	-2.38342	0.318662	non-significant	-2.20016	0.195267	non-significant
KRT14	ENSG00000186847	None	-4.17095	0.42039	non-significant	1.95188	NA	non-significant	NA	NA	non-significant	1.23206	NA	non-significant
AZGP1	ENSG00000160862	None	3.03921	0.423057	non-significant	-0.867282	0.905546	non-significant	NA	NA	non-significant	1.00073	NA	non-significant
PTPRH	ENSG00000080031	None	1.43607	0.423494	non-significant	-1.81873	0.319652	non-significant	-3.45585	0.0167281	down	0.816301	0.771273	non-significant
AC099489.1	ENSG00000188897	None	-2.2655	0.423494	non-significant	-2.56791	0.0576702	non-significant	-4.72099	6.57932e-06	down	0.0352019	0.990594	non-significant
RAB9B	ENSG00000123570	None	1.20605	0.425035	non-significant	-0.332287	0.898378	non-significant	0.915514	0.0221497	up	-0.919811	0.0123727	down
HS3ST3A1	ENSG00000153976	None	1.21052	0.425035	non-significant	0.675385	0.643181	non-significant	1.44011	0.0242126	up	-0.0924394	0.933266	non-significant
GCLM	ENSG00000023909	None	1.15023	0.426439	non-significant	-0.0246151	0.991348	non-significant	-0.119643	0.889551	non-significant	-0.18409	0.614737	non-significant
TGFBR1	ENSG00000106799	None	1.20519	0.427545	non-significant	-0.470343	0.528249	non-significant	-0.762687	0.0857092	non-significant	-0.313268	0.328384	non-significant
DNAH12	ENSG00000174844	None	-2.27642	0.428221	non-significant	0.530223	0.883548	non-significant	-0.272259	0.763255	non-significant	0.547156	0.825708	non-significant
DGKK	ENSG00000274588	None	-3.79588	0.428221	non-significant	-2.6238	NA	non-significant	-1.70159	NA	non-significant	-1.50292	NA	non-significant
DNAH2	ENSG00000183914	None	-2.52675	0.429041	non-significant	-2.06779	0.293972	non-significant	-3.49331	4.48211e-05	down	-1.98374	0.120852	non-significant
C4orf19	ENSG00000154274	None	1.85128	0.429986	non-significant	-0.593193	0.87901	non-significant	-5.01431	0.000329973	down	-0.427785	0.786912	non-significant
COL21A1	ENSG00000124749	None	-2.74072	0.430103	non-significant	-1.77906	0.107871	non-significant	-0.154088	0.963494	non-significant	-1.60288	0.0042172	down
GADL1	ENSG00000144644	None	-3.16833	0.431367	non-significant	1.4401	NA	non-significant	-0.312516	NA	non-significant	-0.663508	NA	non-significant
DIRC3-AS1	ENSG00000233143	None	1.73373	0.431367	non-significant	1.13699	0.548522	non-significant	-2.17873	0.158213	non-significant	1.50173	0.13206	non-significant
PAX7	ENSG00000009709	None	4.35409	0.434265	non-significant	-0.122821	0.987731	non-significant	-7.9156	0.0338497	down	-1.17644	0.44528	non-significant
AC097652.1	ENSG00000250658	None	6.37958	0.435965	non-significant	5.92373	0.235141	non-significant	2.37519	NA	non-significant	4.91351	6.07111e-05	up
IRF4	ENSG00000137265	None	-2.3258	0.438498	non-significant	2.67017	0.00441198	up	-0.883585	NA	non-significant	-1.07797	0.684222	non-significant
ITPKA	ENSG00000137825	None	1.60869	0.441764	non-significant	-1.17568	0.26727	non-significant	-0.424446	NA	non-significant	-0.387255	0.827377	non-significant
TNFSF10	ENSG00000121858	None	3.00186	0.442947	non-significant	3.32568	0.0120321	up	4.71021	NA	non-significant	1.62285	0.439932	non-significant
PODNL1	ENSG00000132000	None	2.14604	0.442947	non-significant	1.00417	0.630535	non-significant	0.979255	0.259382	non-significant	0.341047	0.635471	non-significant
RALYL	ENSG00000184672	None	-1.92538	0.444744	non-significant	-0.435624	0.90944	non-significant	-5.20916	7.79381e-12	down	1.08256	0.373007	non-significant
ARRDC2	ENSG00000105643	None	1.30678	0.445926	non-significant	0.339724	0.930515	non-significant	-0.159776	0.959275	non-significant	-0.14242	0.895317	non-significant
CCDC33	ENSG00000140481	None	-2.51061	0.445926	non-significant	0.392716	0.961673	non-significant	-2.56975	0.0392541	down	0.813011	NA	non-significant
GNA14	ENSG00000156049	None	2.51128	0.445926	non-significant	0.557763	0.894728	non-significant	0.360705	NA	non-significant	1.32309	0.0354149	up
CHRNA9	ENSG00000174343	None	1.78514	0.445926	non-significant	-0.665113	0.739703	non-significant	-0.730426	0.851137	non-significant	-2.85438	0.00184038	down
RASSF9	ENSG00000198774	None	-2.23907	0.445926	non-significant	1.08425	0.0644318	non-significant	1.71837	0.000989861	up	-0.904031	0.138854	non-significant
AL133318.1	ENSG00000288542	None	3.80906	0.445926	non-significant	-0.214934	0.985349	non-significant	-4.29117	0.423279	non-significant	-2.72928	NA	non-significant
AC126544.2	ENSG00000285668	None	-7.39666	0.450393	non-significant	0.530394	0.955933	non-significant	NA	NA	non-significant	NA	NA	non-significant
AC005586.2	ENSG00000261305	None	4.45836	0.451895	non-significant	0.955	NA	non-significant	-0.36626	NA	non-significant	0.519832	NA	non-significant
RGL3	ENSG00000205517	None	1.41809	0.45447	non-significant	0.401184	NA	non-significant	0.869063	0.710636	non-significant	2.43229	0.382444	non-significant
SPARCL1	ENSG00000152583	None	-2.35759	0.455189	non-significant	-1.72664	0.154312	non-significant	-0.572849	0.160359	non-significant	-1.19943	0.319128	non-significant
RFLNA	ENSG00000178882	None	1.97649	0.457445	non-significant	0.354146	0.901967	non-significant	-1.40253	0.111301	non-significant	0.806551	0.483834	non-significant
CLCN3P1	ENSG00000232000	None	-1.68147	0.457445	non-significant	-0.539308	0.890585	non-significant	-0.0534258	0.974631	non-significant	0.6741	0.545896	non-significant
OTX1	ENSG00000115507	None	-3.14689	0.460237	non-significant	0.0901755	0.990309	non-significant	7.04469	1.28745e-11	up	-0.148168	0.926236	non-significant
VWDE	ENSG00000146530	None	2.13051	0.460237	non-significant	-1.0065	0.869624	non-significant	-1.29676	0.406505	non-significant	4.86011	0.000722829	up
TM4SF18	ENSG00000163762	None	-4.33492	0.460237	non-significant	-0.68226	0.908888	non-significant	0.276598	NA	non-significant	-1.24539	0.330728	non-significant
AC073172.1	ENSG00000254789	None	4.83069	0.460237	non-significant	6.33492	NA	non-significant	NA	NA	non-significant	0.519832	NA	non-significant
AC006504.1	ENSG00000261770	None	2.59621	0.460237	non-significant	-0.0987316	0.979096	non-significant	1.71003	0.244311	non-significant	-4.15928	0.00378575	down
AL662844.4	ENSG00000272501	None	1.37244	0.460237	non-significant	-0.325902	0.886439	non-significant	-1.32541	0.325248	non-significant	1.69212	0.059408	non-significant
AC073130.3	ENSG00000279086	None	2.1938	0.460237	non-significant	2.87529	0.118187	non-significant	2.33232	NA	non-significant	0.194344	0.905132	non-significant
ATP13A4	ENSG00000127249	None	-1.55517	0.461113	non-significant	-1.17754	0.273206	non-significant	-2.84414	0.01779	down	2.15427	0.146631	non-significant
SMCO2	ENSG00000165935	None	1.78541	0.461113	non-significant	-1.53354	0.562871	non-significant	-0.348139	NA	non-significant	1.38936	NA	non-significant
AL133166.1	ENSG00000257522	None	-6.39703	0.461113	non-significant	2.23346	NA	non-significant	0.345665	NA	non-significant	0.519832	NA	non-significant
AL357075.3	ENSG00000287260	None	3.17354	0.461113	non-significant	0.886428	0.793979	non-significant	1.94317	NA	non-significant	-0.261153	0.884459	non-significant
LAMA4	ENSG00000112769	None	1.16989	0.461257	non-significant	0.349083	0.881721	non-significant	-0.561054	0.665958	non-significant	-0.772287	0.0114373	down
VWF	ENSG00000110799	None	-1.87163	0.466341	non-significant	-0.357724	0.949853	non-significant	4.24557	0.00200398	up	-1.57049	0.278407	non-significant
LETM2	ENSG00000165046	None	-1.76194	0.466341	non-significant	-2.31549	0.000110373	down	-0.850235	0.246892	non-significant	0.357199	0.751415	non-significant
IGFBP6	ENSG00000167779	None	1.96176	0.467073	non-significant	2.22088	0.0738814	non-significant	1.31738	0.55783	non-significant	-0.405714	0.744645	non-significant
DMGDH	ENSG00000132837	None	2.20141	0.474111	non-significant	0.639577	0.861253	non-significant	0.719722	0.617067	non-significant	1.19584	0.159898	non-significant
SLC9A4	ENSG00000180251	None	-2.70259	0.47431	non-significant	-0.817259	0.786134	non-significant	2.35643	NA	non-significant	1.55004	0.42921	non-significant
OTX2-AS1	ENSG00000248550	None	-10.0192	0.47431	non-significant	-4.60062	NA	non-significant	5.90531	0.000636742	up	1.55843	NA	non-significant
PDE7B	ENSG00000171408	None	-1.91416	0.477285	non-significant	0.0449353	0.994807	non-significant	0.463829	0.667325	non-significant	-1.62361	1.43988e-08	down
PHYHD1	ENSG00000175287	None	-2.52732	0.477285	non-significant	-1.22016	0.710495	non-significant	-1.24395	0.328193	non-significant	-0.0159625	0.992556	non-significant
THAP12P5	ENSG00000218020	None	5.96181	0.477285	non-significant	-1.07593	NA	non-significant	0.345665	NA	non-significant	NA	NA	non-significant
AC105046.1	ENSG00000261026	None	-3.7673	0.481559	non-significant	0.025533	NA	non-significant	0.345665	NA	non-significant	NA	NA	non-significant
PCDHA6	ENSG00000081842	None	-2.3576	0.482554	non-significant	-1.51705	0.495759	non-significant	-0.113879	0.857562	non-significant	7.27589	9.25032e-39	up
NRG4	ENSG00000169752	None	-3.86658	0.482554	non-significant	-4.16308	0.26727	non-significant	-1.21424	0.435844	non-significant	-0.521617	NA	non-significant
FNBP1P1	ENSG00000257800	None	-1.47567	0.482554	non-significant	-0.0531915	0.984861	non-significant	0.202895	0.936801	non-significant	-1.40302	0.0236674	down
PCK2	ENSG00000100889	None	1.88387	0.483656	non-significant	1.47521	0.506091	non-significant	0.481734	0.815223	non-significant	0.813006	0.0558891	non-significant
PTGER3	ENSG00000050628	None	-1.97465	0.485779	non-significant	3.01006	0.177177	non-significant	-4.09489	0.0136052	down	1.26831	0.404243	non-significant
CDO1	ENSG00000129596	None	-1.47085	0.486956	non-significant	-1.78394	0.357786	non-significant	-0.496626	0.0889689	non-significant	-1.59346	0.00270251	down
C2orf50	ENSG00000150873	None	-3.43487	0.486956	non-significant	-1.08924	0.272301	non-significant	0.74786	0.354691	non-significant	-1.67883	0.115246	non-significant
AC069257.4	ENSG00000272741	None	-4.4138	0.486956	non-significant	-3.45373	0.618937	non-significant	3.54787	NA	non-significant	-1.22183	NA	non-significant
AC079298.3	ENSG00000280241	None	6.7289	0.486956	non-significant	1.84088	0.702572	non-significant	2.909	NA	non-significant	-2.47395	0.0483744	down
CCDC170	ENSG00000120262	None	-2.68393	0.488062	non-significant	0.399236	0.853491	non-significant	-0.0463106	0.969759	non-significant	-3.73978	8.63706e-07	down
MYRF	ENSG00000124920	None	1.70789	0.491708	non-significant	-1.24706	0.463626	non-significant	-2.97336	0.00202572	down	1.00357	0.0144707	up
ZNF503	ENSG00000165655	None	1.33788	0.491708	non-significant	1.05385	0.586469	non-significant	1.79589	5.77594e-13	up	-0.825836	0.242893	non-significant
C22orf31	ENSG00000100249	None	-3.65115	0.4949	non-significant	-0.714108	0.860858	non-significant	1.05101	NA	non-significant	-1.99975	NA	non-significant
C1QL2	ENSG00000144119	None	2.82383	0.49501	non-significant	0.855035	NA	non-significant	2.7758	NA	non-significant	0.566562	NA	non-significant
PKD1P5	ENSG00000254681	None	2.78075	0.498211	non-significant	0.0253482	0.988385	non-significant	-2.07698	0.0291755	down	4.88081	0.164295	non-significant
LRRC38	ENSG00000162494	None	5.21835	0.507248	non-significant	-1.95492	NA	non-significant	1.18684	NA	non-significant	NA	NA	non-significant
PPIEL	ENSG00000243970	None	-2.00992	0.507248	non-significant	0.190234	0.92788	non-significant	0.53865	0.596773	non-significant	0.77994	0.0486245	up
ATP2A3	ENSG00000074370	None	1.93964	0.508322	non-significant	0.1091	0.987139	non-significant	-2.6564	0.336652	non-significant	1.3894	0.382149	non-significant
TMEM151A	ENSG00000179292	None	1.23853	0.508322	non-significant	2.25016	0.00296295	up	-3.62148	0.0162377	down	0.350248	0.642296	non-significant
SMYD3	ENSG00000185420	None	1.63231	0.508322	non-significant	2.31965	4.65151e-05	up	0.333871	0.762274	non-significant	-0.335511	0.614696	non-significant
AC073896.1	ENSG00000144785	None	1.87914	0.508331	non-significant	-0.450705	0.929213	non-significant	-0.307927	0.921331	non-significant	1.06985	NA	non-significant
WNT8B	ENSG00000075290	None	-4.45063	0.509153	non-significant	-2.077	NA	non-significant	-1.36553	NA	non-significant	-2.80954	NA	non-significant
ALPL	ENSG00000162551	None	1.88939	0.510207	non-significant	1.21321	0.727418	non-significant	-1.48337	0.34801	non-significant	1.36857	0.0174024	up
RGPD1	ENSG00000187627	None	-4.12988	0.510207	non-significant	-5.20554	0.168051	non-significant	-0.886872	0.627666	non-significant	-0.826362	0.774649	non-significant
EPAS1	ENSG00000116016	None	2.86921	0.512848	non-significant	2.15286	0.0553806	non-significant	3.10369	0.0842992	non-significant	-0.568074	0.0328131	down
CFAP74	ENSG00000142609	None	-2.30454	0.512848	non-significant	-1.50944	0.437704	non-significant	-0.554181	0.599389	non-significant	1.15472	0.680305	non-significant
VAX1	ENSG00000148704	None	-2.72174	0.512848	non-significant	-3.84717	0.129503	non-significant	-4.24767	0.294487	non-significant	-2.73431	0.0328265	down
UCP2	ENSG00000175567	None	-1.36124	0.512848	non-significant	-2.34069	0.000534015	down	-0.534286	0.239555	non-significant	1.13872	0.0610976	non-significant
H2BC12	ENSG00000197903	None	1.28569	0.512848	non-significant	-0.962973	0.468768	non-significant	-1.47425	0.30393	non-significant	0.604565	0.0685836	non-significant
PNMA6B	ENSG00000268883	None	7.24671	0.512848	non-significant	0.112236	0.99199	non-significant	NA	NA	non-significant	4.38742	0.0449225	up
AC138035.1	ENSG00000238035	None	-1.26443	0.51334	non-significant	0.776529	0.357345	non-significant	-0.385958	0.459255	non-significant	1.43133	0.0852483	non-significant
MGST1	ENSG00000008394	None	-1.36278	0.514446	non-significant	0.068447	0.988042	non-significant	-0.460791	0.552797	non-significant	-0.00488923	0.996168	non-significant
RGPD2	ENSG00000185304	None	-7.56236	0.514446	non-significant	-8.05497	0.244399	non-significant	-5.58537	0.32317	non-significant	1.92086	NA	non-significant
CD38	ENSG00000004468	None	-1.49389	0.514557	non-significant	0.0102733	0.998359	non-significant	1.20028	0.271167	non-significant	-0.806223	0.657616	non-significant
PGBD5	ENSG00000177614	None	1.05324	0.514557	non-significant	0.335572	0.866213	non-significant	-3.49481	2.04376e-06	down	0.373534	0.654474	non-significant
KCTD8	ENSG00000183783	None	-7.24195	0.514557	non-significant	1.67459	NA	non-significant	-4.78875	0.12898	non-significant	0.586758	0.830442	non-significant
AC069277.1	ENSG00000189229	None	-2.87132	0.514557	non-significant	-1.8064	0.61335	non-significant	-1.26626	0.638923	non-significant	NA	NA	non-significant
NKAIN3-IT1	ENSG00000274956	None	-1.51515	0.514557	non-significant	-1.17944	0.898378	non-significant	0.183245	0.884189	non-significant	-1.51307	0.0111408	down
Z99496.2	ENSG00000286339	None	3.13525	0.514557	non-significant	-0.47096	0.957881	non-significant	4.16684	1.89373e-11	up	-5.2209	3.52127e-16	down
NOS2	ENSG00000007171	None	-3.2982	0.51616	non-significant	-0.483638	NA	non-significant	-2.9176	NA	non-significant	-1.80124	NA	non-significant
MAFF	ENSG00000185022	None	-1.26291	0.517189	non-significant	0.220801	0.929367	non-significant	-1.16491	0.1371	non-significant	-0.823959	0.215295	non-significant
ANPEP	ENSG00000166825	None	2.19113	0.518135	non-significant	-3.53974	0.0464025	down	1.12881	NA	non-significant	-1.09767	0.189355	non-significant
RCAN2	ENSG00000172348	None	-1.11707	0.518793	non-significant	1.25342	0.103258	non-significant	2.07549	4.60403e-07	up	-0.380242	0.624883	non-significant
FOXC2	ENSG00000176692	None	-2.62326	0.521158	non-significant	2.33973	0.237927	non-significant	3.39524	NA	non-significant	0.633855	0.622289	non-significant
AC138894.2	ENSG00000270118	None	7.2207	0.521158	non-significant	-0.353015	0.949853	non-significant	-0.495169	NA	non-significant	NA	NA	non-significant
TBR1	ENSG00000136535	None	-3.12383	0.52143	non-significant	-1.27859	NA	non-significant	-2.3995	NA	non-significant	0.0353177	0.992629	non-significant
LINC02593	ENSG00000223764	None	1.08105	0.52143	non-significant	-1.53871	0.1041	non-significant	1.26997	0.0961387	non-significant	0.367997	0.646195	non-significant
AF001548.1	ENSG00000263065	None	3.12273	0.52143	non-significant	2.13545	NA	non-significant	NA	NA	non-significant	0.519832	NA	non-significant
AL137139.2	ENSG00000286757	None	-6.32281	0.521849	non-significant	3.61028	0.160896	non-significant	0.175556	NA	non-significant	-1.92997	0.394316	non-significant
FAM118A	ENSG00000100376	None	-1.41568	0.522089	non-significant	0.303018	0.93336	non-significant	-0.256567	0.61593	non-significant	-0.717598	0.00229557	down
ADAMTSL3	ENSG00000156218	None	1.91239	0.523449	non-significant	1.30882	0.671561	non-significant	-0.21089	0.914954	non-significant	1.33331	0.0136634	up
NGFR	ENSG00000064300	None	1.83262	0.523674	non-significant	0.455386	0.922612	non-significant	-5.66474	1.50631e-06	down	2.71349	4.19019e-05	up
SAMD12	ENSG00000177570	None	-2.72694	0.523674	non-significant	2.42586	0.0338398	up	-2.96597	1.95761e-05	down	0.181707	0.910217	non-significant
STXBP2	ENSG00000076944	None	1.30785	0.523896	non-significant	-0.14127	0.974518	non-significant	-0.282278	0.847987	non-significant	1.37167	0.128397	non-significant
CHN2	ENSG00000106069	None	-1.35744	0.526535	non-significant	-1.34456	0.339989	non-significant	-0.970047	0.354691	non-significant	1.0249	0.294406	non-significant
EGR3	ENSG00000179388	None	-2.97945	0.526535	non-significant	-1.39802	0.426725	non-significant	1.72217	0.170718	non-significant	-1.90806	0.0260182	down
CLDN19	ENSG00000164007	None	-2.97279	0.527374	non-significant	-6.84192	0.102689	non-significant	-2.03983	NA	non-significant	2.66661	0.155311	non-significant
SERINC5	ENSG00000164300	None	-1.30281	0.527374	non-significant	-0.367775	0.817407	non-significant	0.677992	0.0647718	non-significant	-0.19917	0.829836	non-significant
SLC47A2	ENSG00000180638	None	-3.16676	0.527374	non-significant	1.0185	0.0854406	non-significant	-0.920897	0.224939	non-significant	-2.99875	0.00195766	down
H2BP1	ENSG00000223345	None	5.8846	0.527374	non-significant	-1.14122	0.878033	non-significant	1.90817	NA	non-significant	-2.59652	NA	non-significant
COL19A1	ENSG00000082293	None	2.86124	0.527533	non-significant	-1.33952	0.844844	non-significant	-4.76632	0.038018	down	-0.413642	0.810122	non-significant
PKD1L1	ENSG00000158683	None	-2.67269	0.527533	non-significant	-0.740725	0.669665	non-significant	-1.79424	NA	non-significant	0.132597	0.967095	non-significant
MYO1H	ENSG00000174527	None	-2.47824	0.527533	non-significant	0.0246075	NA	non-significant	0.932076	NA	non-significant	-2.08484	0.450556	non-significant
AL627309.3	ENSG00000239945	None	-7.20444	0.527533	non-significant	NA	NA	non-significant	NA	NA	non-significant	3.79483	0.265359	non-significant
LINC01127	ENSG00000281162	None	-2.54348	0.530098	non-significant	-1.48356	0.675776	non-significant	0.865818	0.727793	non-significant	-4.37435	0.00420485	down
IL27RA	ENSG00000104998	None	1.1471	0.530875	non-significant	1.43425	0.227784	non-significant	-0.854441	0.375984	non-significant	0.360972	0.481058	non-significant
ITGA5	ENSG00000161638	None	1.94497	0.530875	non-significant	2.16346	0.0600101	non-significant	2.71851	2.06464e-09	up	0.530071	0.40945	non-significant
C1QL3	ENSG00000165985	None	3.17882	0.530875	non-significant	1.78575	0.482281	non-significant	-3.50942	NA	non-significant	1.16161	0.305054	non-significant
GUCA1A	ENSG00000048545	None	-3.58747	0.531196	non-significant	-2.68461	0.442199	non-significant	0.815236	NA	non-significant	0.28227	0.858964	non-significant
KIF26B	ENSG00000162849	None	1.16487	0.531196	non-significant	0.238046	0.953163	non-significant	0.126082	0.838364	non-significant	-0.0551749	0.962181	non-significant
NOG	ENSG00000183691	None	2.0606	0.531196	non-significant	0.953103	0.768993	non-significant	0.825965	0.435308	non-significant	2.11259	0.0371723	up
RIMBP3	ENSG00000275793	None	1.26728	0.531196	non-significant	0.0429804	0.987022	non-significant	-0.19321	0.952998	non-significant	0.794893	0.78151	non-significant
CFAP157	ENSG00000160401	None	-3.63483	0.53285	non-significant	-0.321833	0.938411	non-significant	-0.460071	0.26449	non-significant	-1.80872	NA	non-significant
COL9A3	ENSG00000092758	None	-1.81948	0.533648	non-significant	1.87816	0.00169034	up	-0.239451	0.883221	non-significant	-0.253309	0.836878	non-significant
AC002316.1	ENSG00000132359	None	-2.71311	0.533648	non-significant	-3.01091	0.225125	non-significant	-2.23629	0.000459482	down	-1.3084	0.099164	non-significant
FBXL8	ENSG00000135722	None	1.28205	0.534767	non-significant	1.6416	0.157577	non-significant	1.01787	0.462942	non-significant	0.791166	0.196762	non-significant
C5orf63	ENSG00000164241	None	-2.10654	0.538343	non-significant	1.32323	0.0766193	non-significant	-2.0473	0.500907	non-significant	-5.31327	0.000195612	down
CDC20B	ENSG00000164287	None	-5.34801	0.538343	non-significant	-2.53629	NA	non-significant	-0.627675	0.793185	non-significant	-0.912128	NA	non-significant
ANKRD18B	ENSG00000230453	None	3.88846	0.538343	non-significant	1.58827	NA	non-significant	-2.99158	0.073486	non-significant	0.429456	0.83433	non-significant
AC009228.1	ENSG00000242628	None	-1.91852	0.538343	non-significant	-6.10876	6.92857e-09	down	0.669185	0.8538	non-significant	-1.62412	0.711616	non-significant
ADM2	ENSG00000128165	None	1.91966	0.538752	non-significant	1.30637	0.573957	non-significant	0.746673	0.72061	non-significant	1.62099	4.74449e-08	up
PCDHGB5	ENSG00000276547	None	1.41958	0.540416	non-significant	-0.0907463	0.967358	non-significant	-4.21547	0.000303332	down	-0.437408	0.809239	non-significant
TMEM74	ENSG00000164841	None	-3.54053	0.541895	non-significant	0.661876	0.886954	non-significant	-0.656665	0.482236	non-significant	1.14865	NA	non-significant
LCN9	ENSG00000148386	None	5.73445	0.544312	non-significant	2.22722	NA	non-significant	5.98039	0.000398894	up	-5.46729	1.82972e-07	down
DNAH3	ENSG00000158486	None	-3.75667	0.544312	non-significant	-2.84768	0.317588	non-significant	0.345665	NA	non-significant	1.00073	NA	non-significant
GPR34	ENSG00000171659	None	-3.18093	0.550044	non-significant	-2.081	NA	non-significant	4.50779	NA	non-significant	-0.441953	NA	non-significant
GATD3B	ENSG00000280071	None	-1.15831	0.550044	non-significant	-1.78811	0.339989	non-significant	-2.99413	1.65366e-08	down	5.60236	6.88223e-41	up
AL356495.1	ENSG00000287477	None	-5.25988	0.551248	non-significant	-3.01858	0.598274	non-significant	-2.05759	NA	non-significant	1.89306	0.157738	non-significant
AC112178.1	ENSG00000249803	None	7.13975	0.552156	non-significant	-0.627368	NA	non-significant	-0.988311	0.712104	non-significant	3.84773	0.0226312	up
CHODL	ENSG00000154645	None	-2.52881	0.552333	non-significant	-1.0299	0.603592	non-significant	-6.40262	3.9746e-09	down	0.844834	0.451617	non-significant
C19orf81	ENSG00000235034	None	1.87224	0.552333	non-significant	1.23382	0.597327	non-significant	-0.948594	0.776069	non-significant	-0.403582	0.724441	non-significant
COL24A1	ENSG00000171502	None	-1.08357	0.55333	non-significant	-0.47369	0.734614	non-significant	0.629785	0.274995	non-significant	-1.02885	0.0695503	non-significant
AC109583.1	ENSG00000206549	None	6.12242	0.55333	non-significant	4.62042	NA	non-significant	NA	NA	non-significant	0.519832	NA	non-significant
AC132217.1	ENSG00000240801	None	5.93068	0.55333	non-significant	-13.0355	0.00074062	down	0.584006	0.857077	non-significant	1.91452	0.30164	non-significant
CACNG3	ENSG00000006116	None	2.44516	0.55477	non-significant	-6.45841	0.326736	non-significant	-4.94968	0.231178	non-significant	-3.01752	0.200586	non-significant
SH3GL3	ENSG00000140600	None	-2.79021	0.554816	non-significant	2.42041	0.092391	non-significant	-5.42695	5.01536e-05	down	0.434526	0.7434	non-significant
MEOX1	ENSG00000005102	None	-4.3615	0.559332	non-significant	3.37432	NA	non-significant	-4.963	0.154733	non-significant	-1.88728	NA	non-significant
SLC9A5	ENSG00000135740	None	1.28541	0.560138	non-significant	1.60148	0.00693262	up	-2.49971	0.00384283	down	-0.923135	0.326347	non-significant
XYLT1	ENSG00000103489	None	1.63968	0.567284	non-significant	0.845951	0.549127	non-significant	-0.339132	0.391411	non-significant	-0.835948	0.2759	non-significant
CDH9	ENSG00000113100	None	-3.48745	0.567284	non-significant	-5.82099	NA	non-significant	-3.77902	NA	non-significant	0.519832	NA	non-significant
FBXL16	ENSG00000127585	None	1.09027	0.567284	non-significant	-0.251622	0.953868	non-significant	-6.9011	2.24252e-05	down	2.96371	0.00122417	up
TRPM4	ENSG00000130529	None	1.15252	0.567284	non-significant	1.15925	0.291179	non-significant	0.140421	0.871627	non-significant	-0.749812	0.0189622	down
STON2	ENSG00000140022	None	-1.43298	0.567284	non-significant	-2.10105	0.14091	non-significant	0.612302	0.0686917	non-significant	-1.11348	0.0356607	down
VWA3B	ENSG00000168658	None	-3.0087	0.567284	non-significant	-2.89673	0.0580483	non-significant	-0.761774	0.369737	non-significant	-1.39523	NA	non-significant
AC012213.1	ENSG00000253477	None	2.77341	0.567284	non-significant	-0.997512	0.877361	non-significant	-0.0395333	0.988278	non-significant	-2.29324	0.142735	non-significant
FAM225B	ENSG00000225684	None	5.84393	0.568254	non-significant	0.748392	0.937114	non-significant	2.37519	NA	non-significant	-1.39029	0.606567	non-significant
SLC9A2	ENSG00000115616	None	-2.08865	0.568576	non-significant	-1.43879	0.645367	non-significant	-2.01791	NA	non-significant	-0.55765	0.84332	non-significant
DLG2	ENSG00000150672	None	-1.57083	0.568576	non-significant	-0.335689	0.856744	non-significant	-0.54991	0.51887	non-significant	-0.67524	0.530058	non-significant
SMIM32	ENSG00000271824	None	2.21631	0.568576	non-significant	0.052059	0.991916	non-significant	0.365851	NA	non-significant	0.704649	0.7934	non-significant
RMRP	ENSG00000277027	None	-3.71198	0.574252	non-significant	0.198467	0.926207	non-significant	-1.91638	NA	non-significant	0.0389407	NA	non-significant
AC087721.2	ENSG00000285920	None	-1.5051	0.574252	non-significant	-0.514508	0.797861	non-significant	0.740737	0.851329	non-significant	-0.126174	0.967603	non-significant
LINC00880	ENSG00000243629	None	-2.65768	0.580223	non-significant	0.996623	0.646094	non-significant	-0.562659	0.405904	non-significant	-1.45966	0.315051	non-significant
AC009133.3	ENSG00000260719	None	-4.89283	0.580223	non-significant	-0.215646	NA	non-significant	3.77281	NA	non-significant	NA	NA	non-significant
CH25H	ENSG00000138135	None	-3.86481	0.580536	non-significant	0.680709	0.92242	non-significant	0.265853	0.89446	non-significant	-2.6766	0.00638607	down
LINC00457	ENSG00000225179	None	3.95933	0.582112	non-significant	-1.07016	NA	non-significant	NA	NA	non-significant	0.290602	NA	non-significant
SLC29A3	ENSG00000198246	None	1.2146	0.582715	non-significant	0.529582	0.770947	non-significant	-2.07796	0.0859876	non-significant	0.0533524	0.931134	non-significant
CCDC160	ENSG00000203952	None	-1.45224	0.58274	non-significant	0.14149	0.966385	non-significant	0.905434	0.186595	non-significant	-0.368806	0.543648	non-significant
FAM182A	ENSG00000125804	None	-1.8203	0.588512	non-significant	-0.244098	0.921616	non-significant	-0.416106	0.701399	non-significant	-1.56642	0.00497432	down
ERICH5	ENSG00000177459	None	1.51257	0.588512	non-significant	1.713	0.00287947	up	2.07736	0.279639	non-significant	-1.37224	0.0492726	down
CDC42P2	ENSG00000234844	None	4.11436	0.589492	non-significant	4.39937	NA	non-significant	1.18684	NA	non-significant	NA	NA	non-significant
SAMD5	ENSG00000203727	None	-2.24857	0.590042	non-significant	1.27165	0.604222	non-significant	1.64921	0.0324762	up	0.177084	0.848377	non-significant
LINC00475	ENSG00000225511	None	1.79455	0.590042	non-significant	2.9589	7.56592e-10	up	2.13854	0.302369	non-significant	0.560019	0.672751	non-significant
CCDC173	ENSG00000154479	None	-2.51061	0.590186	non-significant	-2.27445	0.0608579	non-significant	-0.868339	0.338916	non-significant	-1.04676	0.43425	non-significant
CALB1	ENSG00000104327	None	-3.15451	0.591991	non-significant	-4.41677	0.0192103	down	0.273609	0.882572	non-significant	-0.1662	0.9197	non-significant
GCK	ENSG00000106633	None	-2.4938	0.591991	non-significant	0.140266	0.985349	non-significant	-0.341015	0.810936	non-significant	2.2417	0.012287	up
SNX18P8	ENSG00000231390	None	5.10172	0.591991	non-significant	-1.27985	NA	non-significant	-3.71863	0.0537546	non-significant	NA	NA	non-significant
CTXND1	ENSG00000259417	None	-2.14965	0.591991	non-significant	-0.748015	0.481756	non-significant	-2.14928	0.124329	non-significant	-2.93629	0.000137712	down
CNTNAP3P2	ENSG00000276386	None	1.58899	0.591991	non-significant	-2.42476	0.234629	non-significant	-0.622475	0.761838	non-significant	-6.81988	3.32081e-09	down
SPR	ENSG00000116096	None	1.05149	0.592016	non-significant	0.53333	0.823211	non-significant	0.267758	0.852276	non-significant	1.50277	0.00330374	up
SYNPO2	ENSG00000172403	None	1.81548	0.595908	non-significant	2.06599	0.00704076	up	0.403671	0.744825	non-significant	-0.656425	0.584237	non-significant
IGSF21	ENSG00000117154	None	-5.44883	0.596747	non-significant	-4.68234	0.287929	non-significant	-4.39667	0.0959136	non-significant	-2.54741	NA	non-significant
ENTPD1	ENSG00000138185	None	2.08071	0.596747	non-significant	-1.62229	0.195618	non-significant	-0.847214	0.642528	non-significant	0.370569	0.747752	non-significant
LINC02693	ENSG00000212719	None	1.01936	0.596823	non-significant	2.87858	0.0403008	up	-0.409043	0.89946	non-significant	-0.702487	0.113768	non-significant
RSPO2	ENSG00000147655	None	-3.58685	0.599523	non-significant	0.715108	0.915593	non-significant	-0.0927284	0.973082	non-significant	-3.67009	0.000141467	down
SP8	ENSG00000164651	None	-2.54793	0.599523	non-significant	-2.63015	0.453825	non-significant	-3.38421	0.0387318	down	2.45113	0.11322	non-significant
MGAM	ENSG00000257335	None	-2.60117	0.599523	non-significant	1.1124	0.784628	non-significant	-3.69427	3.2308e-06	down	0.357932	NA	non-significant
CCDC39	ENSG00000284862	None	-3.18851	0.599523	non-significant	-1.05271	0.65579	non-significant	-1.19145	0.0452354	down	-0.340186	0.906444	non-significant
TRIB3	ENSG00000101255	None	1.98262	0.600279	non-significant	0.769115	0.669853	non-significant	0.222255	0.815244	non-significant	1.51669	8.54473e-13	up
EFEMP1	ENSG00000115380	None	-1.84781	0.600279	non-significant	0.139432	0.976557	non-significant	-1.28541	0.00227725	down	0.600206	0.430827	non-significant
HCRTR1	ENSG00000121764	None	1.98204	0.600279	non-significant	1.87327	NA	non-significant	-1.20184	NA	non-significant	1.24312	NA	non-significant
ANO1	ENSG00000131620	None	-1.46119	0.600279	non-significant	1.76638	0.0906084	non-significant	4.17975	1.01312e-07	up	0.167922	0.937137	non-significant
ANKRD53	ENSG00000144031	None	-1.92653	0.600279	non-significant	-1.73145	0.520502	non-significant	-0.0227048	0.993268	non-significant	1.61918	0.0534557	non-significant
CPA5	ENSG00000158525	None	-1.58858	0.600279	non-significant	2.32232	0.419658	non-significant	3.63413	0.00653806	up	2.19587	0.314564	non-significant
CYP4F26P	ENSG00000226562	None	6.10444	0.600279	non-significant	-0.189499	NA	non-significant	-3.25291	0.145589	non-significant	0.443196	NA	non-significant
H2BC15	ENSG00000233822	None	1.3462	0.600279	non-significant	-0.729781	0.595335	non-significant	-0.306516	0.883881	non-significant	2.36943	5.39392e-05	up
AC022400.3	ENSG00000242288	None	-1.58223	0.600279	non-significant	0.514942	0.912395	non-significant	0.530043	NA	non-significant	0.330187	0.964217	non-significant
ANKRD20A1	ENSG00000260691	None	2.00423	0.600279	non-significant	1.23759	0.889257	non-significant	-1.79622	0.2465	non-significant	-1.25254	0.641897	non-significant
AC110774.1	ENSG00000279013	None	-5.3777	0.600279	non-significant	NA	NA	non-significant	-3.94075	NA	non-significant	NA	NA	non-significant
AC008397.2	ENSG00000285188	None	-2.45681	0.600279	non-significant	-0.112236	0.986417	non-significant	-4.89375	0.0223376	down	1.23966	NA	non-significant
CA12	ENSG00000074410	None	-2.66371	0.600284	non-significant	-1.85669	0.243228	non-significant	-0.334732	0.848772	non-significant	-0.241399	0.586722	non-significant
AC104695.4	ENSG00000270640	None	-2.34391	0.604417	non-significant	-0.145688	0.973532	non-significant	1.99567	NA	non-significant	0.511422	NA	non-significant
DLX6	ENSG00000006377	None	-2.41251	0.606674	non-significant	-4.14729	NA	non-significant	-4.74862	0.121263	non-significant	-1.59454	NA	non-significant
MSTN	ENSG00000138379	None	-1.88058	0.606674	non-significant	-1.24322	0.0748331	non-significant	0.50551	0.835137	non-significant	7.25639	1.73913e-06	up
FP885919.1	ENSG00000274067	None	5.75295	0.606674	non-significant	NA	NA	non-significant	NA	NA	non-significant	1.64278	NA	non-significant
GRPR	ENSG00000126010	None	-1.99859	0.608073	non-significant	-2.0568	0.300067	non-significant	1.81454	0.0773134	non-significant	2.14874	0.0670902	non-significant
NEUROD6	ENSG00000164600	None	-4.81757	0.608073	non-significant	NA	NA	non-significant	-2.80917	NA	non-significant	NA	NA	non-significant
VWA3A	ENSG00000175267	None	-3.39958	0.608073	non-significant	-0.0568157	0.988385	non-significant	-0.209221	0.827112	non-significant	-2.01492	0.062381	non-significant
TTC12	ENSG00000149292	None	-1.04595	0.610083	non-significant	-0.125898	0.959945	non-significant	-0.758349	0.281119	non-significant	-0.00842292	0.992824	non-significant
DZIP1L	ENSG00000158163	None	-1.03908	0.610083	non-significant	0.123622	0.943637	non-significant	0.243893	0.733009	non-significant	0.240939	0.708428	non-significant
MAPK15	ENSG00000181085	None	-2.4024	0.610083	non-significant	-1.7042	0.00369352	down	0.421354	0.419253	non-significant	-0.179299	0.849096	non-significant
SLC30A10	ENSG00000196660	None	-2.24416	0.610083	non-significant	-1.82465	0.523954	non-significant	-3.86087	0.00968541	down	-2.18902	0.266594	non-significant
LINC02611	ENSG00000226791	None	5.42436	0.610083	non-significant	1.79983	0.26303	non-significant	1.58472	NA	non-significant	-1.16695	NA	non-significant
DEUP1	ENSG00000165325	None	-1.59924	0.610379	non-significant	2.29446	0.482452	non-significant	1.36662	0.459632	non-significant	0.676938	0.764119	non-significant
AL512625.3	ENSG00000287168	None	1.44794	0.610379	non-significant	0.782351	NA	non-significant	0.470256	NA	non-significant	0.638885	0.649805	non-significant
EVI2B	ENSG00000185862	None	2.49326	0.612481	non-significant	0.353584	NA	non-significant	1.90817	NA	non-significant	0.736314	0.71211	non-significant
SP5	ENSG00000204335	None	-4.1165	0.612481	non-significant	-1.06307	NA	non-significant	-2.76057	0.492316	non-significant	0.519832	NA	non-significant
LINC02210-CRHR1	ENSG00000263715	None	-7.00589	0.612967	non-significant	5.2699	NA	non-significant	-4.30434	0.154984	non-significant	NA	NA	non-significant
AC133551.1	ENSG00000274175	None	-7.00589	0.612967	non-significant	NA	NA	non-significant	NA	NA	non-significant	NA	NA	non-significant
FYB2	ENSG00000187889	None	-3.3622	0.613212	non-significant	1.45075	NA	non-significant	-0.6008	NA	non-significant	-0.139929	NA	non-significant
CRACR2B	ENSG00000177685	None	-1.44912	0.616392	non-significant	-0.561436	0.929005	non-significant	-1.80136	0.113781	non-significant	-0.109561	0.908998	non-significant
MT1E	ENSG00000169715	None	-1.89905	0.616675	non-significant	0.321531	0.944783	non-significant	4.00727	NA	non-significant	1.14771	0.277903	non-significant
KCNU1	ENSG00000215262	None	3.24522	0.617964	non-significant	2.68975	0.309734	non-significant	2.33232	NA	non-significant	-1.30127	0.768791	non-significant
TNNI1	ENSG00000159173	None	3.15208	0.621239	non-significant	-1.3213	0.778753	non-significant	2.73071	0.0173651	up	-0.321833	0.90565	non-significant
STMND1	ENSG00000230873	None	-3.00207	0.621239	non-significant	-0.688113	NA	non-significant	0.569719	NA	non-significant	0.315554	NA	non-significant
AC092957.1	ENSG00000243620	None	-4.6461	0.627693	non-significant	1.80481	0.540666	non-significant	2.96303	7.33278e-06	up	-1.80999	0.0668859	non-significant
SLC6A20	ENSG00000163817	None	-3.33096	0.6285	non-significant	0.00845936	NA	non-significant	3.69467	0.00366091	up	-3.09479	0.136474	non-significant
FOXD1	ENSG00000251493	None	1.78654	0.6285	non-significant	0.526294	0.924829	non-significant	-0.949845	0.692393	non-significant	1.10959	0.288796	non-significant
TMEM159	ENSG00000011638	None	1.15158	0.629324	non-significant	0.901234	0.419275	non-significant	0.937867	0.285221	non-significant	0.724638	0.0803108	non-significant
WNK4	ENSG00000126562	None	1.05898	0.629324	non-significant	-0.493343	0.923555	non-significant	-0.28779	0.910039	non-significant	0.303515	0.783236	non-significant
FGF11	ENSG00000161958	None	1.44424	0.629324	non-significant	2.51944	1.43378e-06	up	-0.462489	0.391665	non-significant	0.934903	0.234964	non-significant
LDLRAD3	ENSG00000179241	None	-1.02133	0.629324	non-significant	-1.0797	0.148677	non-significant	1.02196	0.000445426	up	-0.612561	0.0322661	down
SDR42E2	ENSG00000183921	None	-3.44642	0.629324	non-significant	0.595049	NA	non-significant	1.313	0.132029	non-significant	NA	NA	non-significant
CACNG5	ENSG00000075429	None	-3.29122	0.631134	non-significant	-3.09644	0.23206	non-significant	-5.22507	1.17118e-13	down	-1.56924	0.396236	non-significant
RIT2	ENSG00000152214	None	2.37456	0.631134	non-significant	-4.8603	0.0644511	non-significant	-5.53648	0.00205353	down	NA	NA	non-significant
AL353746.1	ENSG00000260412	None	-2.69965	0.631134	non-significant	0.823956	NA	non-significant	-3.45631	4.15743e-05	down	0.760078	0.539288	non-significant
CATSPERZ	ENSG00000219435	None	5.90626	0.6318	non-significant	1.21065	NA	non-significant	-2.37578	NA	non-significant	-0.463492	NA	non-significant
TNFSF18	ENSG00000120337	None	-2.70109	0.631892	non-significant	-0.815419	0.849917	non-significant	-0.357171	NA	non-significant	0.847085	NA	non-significant
AC012368.1	ENSG00000225889	None	-1.36437	0.632384	non-significant	-2.32261	0.119125	non-significant	-0.682654	0.326283	non-significant	0.243542	0.87049	non-significant
TENT5B	ENSG00000158246	None	-1.20288	0.632466	non-significant	-0.0708694	0.972603	non-significant	2.2761	0.00269612	up	0.0949271	0.921802	non-significant
PCDHGB7	ENSG00000254122	None	-1.11934	0.632466	non-significant	0.68886	0.335247	non-significant	0.0464673	0.968079	non-significant	0.610092	0.039617	up
CYP4F35P	ENSG00000265787	None	6.92906	0.632466	non-significant	1.37303	NA	non-significant	-0.490415	NA	non-significant	1.00073	NA	non-significant
GRIN2B	ENSG00000273079	None	-1.86663	0.635991	non-significant	-2.5016	0.349143	non-significant	-1.96133	6.18205e-07	down	-1.09307	0.399297	non-significant
CCDC178	ENSG00000166960	None	-3.31929	0.636009	non-significant	-1.7662	0.534321	non-significant	-1.88009	0.288914	non-significant	-1.73093	NA	non-significant
WNT6	ENSG00000115596	None	4.06213	0.637561	non-significant	0.14602	NA	non-significant	NA	NA	non-significant	-1.95807	NA	non-significant
OR7E154P	ENSG00000254715	None	3.75176	0.637792	non-significant	-4.87346	NA	non-significant	NA	NA	non-significant	NA	NA	non-significant
AC138969.3	ENSG00000227827	None	3.23515	0.638939	non-significant	-0.182738	0.971962	non-significant	2.01158	0.329959	non-significant	-0.384842	0.686013	non-significant
SLC25A48	ENSG00000145832	None	-2.3558	0.641006	non-significant	1.12155	0.846316	non-significant	-5.44883	0.0016713	down	1.15458	NA	non-significant
METTL7A	ENSG00000185432	None	-1.31259	0.641232	non-significant	-3.05654	0.00405914	down	0.0553605	0.974914	non-significant	-0.999906	0.116425	non-significant
AC011330.1	ENSG00000249839	None	-1.13801	0.64204	non-significant	0.651109	0.979658	non-significant	-0.112437	0.952971	non-significant	0.501687	0.899644	non-significant
GP5	ENSG00000178732	None	3.46653	0.6467	non-significant	-2.09716	0.531685	non-significant	-0.869346	NA	non-significant	0.414566	NA	non-significant
RGS9	ENSG00000108370	None	1.31001	0.647401	non-significant	0.617985	0.528187	non-significant	0.0561616	0.957105	non-significant	0.482223	0.627686	non-significant
NR2F2-AS1	ENSG00000247809	None	2.22976	0.647401	non-significant	-0.346041	0.906787	non-significant	-0.856246	0.392764	non-significant	-0.833903	0.299338	non-significant
LIPE	ENSG00000079435	None	-1.06956	0.649592	non-significant	-0.670742	0.799504	non-significant	-0.91886	0.317319	non-significant	0.00987142	0.992556	non-significant
MCHR1	ENSG00000128285	None	1.04535	0.64994	non-significant	-2.13803	0.201664	non-significant	-2.95192	0.00285536	down	-0.824921	0.194241	non-significant
SFTA3	ENSG00000229415	None	-7.97426	0.64994	non-significant	-1.07593	NA	non-significant	1.99217	NA	non-significant	NA	NA	non-significant
TRPM3	ENSG00000083067	None	-2.22538	0.651224	non-significant	0.266424	0.966719	non-significant	3.15412	0.000873266	up	-2.09	0.0836534	non-significant
LINC01133	ENSG00000224259	None	5.69776	0.651224	non-significant	3.07137	NA	non-significant	-1.26585	NA	non-significant	0.736082	0.804596	non-significant
LEMD1-DT	ENSG00000224717	None	-2.90549	0.65375	non-significant	-1.3945	NA	non-significant	-3.96107	NA	non-significant	-1.25553	NA	non-significant
AL589787.1	ENSG00000287326	None	2.95046	0.65375	non-significant	0.555434	0.922157	non-significant	2.7758	NA	non-significant	1.29662	0.522926	non-significant
SMCO3	ENSG00000179256	None	4.40802	0.653847	non-significant	3.86671	0.0207725	up	1.90817	NA	non-significant	0.247764	0.809239	non-significant
RPS20P22	ENSG00000239218	None	-1.24625	0.653847	non-significant	-0.916291	0.293451	non-significant	1.17383	0.365762	non-significant	-1.68163	0.102184	non-significant
WDR38	ENSG00000136918	None	-3.48722	0.654075	non-significant	-1.22981	0.696954	non-significant	0.00845494	0.995908	non-significant	-2.04831	NA	non-significant
RGS16	ENSG00000143333	None	1.1623	0.6584	non-significant	-2.50235	0.20028	non-significant	0.0757565	0.972562	non-significant	2.07259	0.000598425	up
FNDC1	ENSG00000164694	None	2.22267	0.659012	non-significant	3.64635	2.70257e-06	up	-0.0559232	0.988933	non-significant	0.301055	0.69892	non-significant
PAPPA2	ENSG00000116183	None	1.86947	0.659733	non-significant	3.37244	1.6325e-07	up	-1.38543	0.0664061	non-significant	0.74853	0.555628	non-significant
RIMS3	ENSG00000117016	None	0.936973	0.659733	non-significant	-0.00452367	0.998359	non-significant	-2.05229	4.27617e-06	down	0.149843	0.736397	non-significant
RAB11FIP1	ENSG00000156675	None	-1.03483	0.659733	non-significant	-1.06575	0.753625	non-significant	0.434416	0.675088	non-significant	0.777819	0.0349077	up
AC012184.3	ENSG00000261777	None	-1.74529	0.659733	non-significant	-0.964539	0.493639	non-significant	-0.530554	0.868058	non-significant	0.366728	NA	non-significant
MYZAP	ENSG00000263155	None	-3.19135	0.659733	non-significant	0.54382	0.897811	non-significant	1.71556	0.615678	non-significant	0.783477	NA	non-significant
AL591686.2	ENSG00000272865	None	-5.05715	0.659733	non-significant	-1.11236	NA	non-significant	-0.885197	NA	non-significant	-4.89605	0.00193398	down
LINC00680	ENSG00000215190	None	1.33043	0.660051	non-significant	-0.313193	0.900678	non-significant	1.52181	0.677608	non-significant	1.66402	0.0285042	up
SLC37A1	ENSG00000160190	None	-0.987039	0.660078	non-significant	-1.14605	0.093196	non-significant	-0.76764	0.0456033	down	-0.385337	0.370289	non-significant
LINC01088	ENSG00000249307	None	-3.05666	0.660078	non-significant	-0.26142	0.937744	non-significant	-0.22325	0.847827	non-significant	-1.30731	0.306666	non-significant
AP000894.2	ENSG00000265179	None	-3.25629	0.660078	non-significant	1.19698	0.856715	non-significant	-0.751747	NA	non-significant	-0.924163	NA	non-significant
ULBP1	ENSG00000111981	None	1.78321	0.66094	non-significant	1.18785	0.0543316	non-significant	0.975789	0.504168	non-significant	2.02974	2.16187e-05	up
ARPP21	ENSG00000172995	None	-1.55902	0.661833	non-significant	-3.58505	0.0956653	non-significant	-0.575789	0.790525	non-significant	0.38931	0.656805	non-significant
NECAB1	ENSG00000123119	None	-1.9392	0.661856	non-significant	0.183045	0.979658	non-significant	2.3631	0.00833294	up	0.608292	0.69892	non-significant
FAM171B	ENSG00000144369	None	-1.01276	0.661856	non-significant	-0.904277	0.526983	non-significant	-0.472438	0.41722	non-significant	-0.731665	0.000505721	down
PPP1R12BP1	ENSG00000229238	None	-5.84328	0.661856	non-significant	NA	NA	non-significant	NA	NA	non-significant	NA	NA	non-significant
NPHP3-ACAD11	ENSG00000274810	None	1.23234	0.661856	non-significant	0.0123881	0.995434	non-significant	0.336994	0.850997	non-significant	-0.395749	0.623898	non-significant
CRISPLD1	ENSG00000121005	None	-0.951907	0.663867	non-significant	-1.37715	0.430778	non-significant	-0.196236	0.635613	non-significant	-0.314847	0.705813	non-significant
SMAD7	ENSG00000101665	None	1.13125	0.663993	non-significant	1.05663	0.148598	non-significant	0.903747	0.319527	non-significant	0.0951953	0.833383	non-significant
PIEZO2	ENSG00000154864	None	1.55305	0.663993	non-significant	0.853702	0.875633	non-significant	3.14429	5.8132e-08	up	-0.605456	0.380321	non-significant
EOMES	ENSG00000163508	None	-4.66468	0.663993	non-significant	0.420138	NA	non-significant	-1.32566	NA	non-significant	NA	NA	non-significant
BPIFC	ENSG00000184459	None	2.23798	0.663993	non-significant	-2.07181	NA	non-significant	-0.111024	NA	non-significant	NA	NA	non-significant
IER5L	ENSG00000188483	None	0.961545	0.663993	non-significant	0.486268	0.529873	non-significant	0.916942	0.0737223	non-significant	-0.503987	0.00358707	down
GMNC	ENSG00000205835	None	-3.52474	0.663993	non-significant	-0.391875	0.95942	non-significant	-0.113954	0.942522	non-significant	0.374399	NA	non-significant
FMN1	ENSG00000248905	None	1.55887	0.663993	non-significant	1.24079	0.508355	non-significant	2.02915	0.198297	non-significant	1.0822	0.251585	non-significant
AC022149.1	ENSG00000269378	None	1.41059	0.663993	non-significant	1.11005	0.524464	non-significant	1.71501	0.00130486	up	0.263958	0.71897	non-significant
AC138907.10	ENSG00000279795	None	-4.67401	0.663993	non-significant	-1.79635	NA	non-significant	-0.213357	0.927798	non-significant	0.0398949	NA	non-significant
NPTXR	ENSG00000221890	None	0.95015	0.664111	non-significant	-0.624503	0.768714	non-significant	-2.1787	0.000174153	down	0.659395	0.221252	non-significant
SOSTDC1	ENSG00000171243	None	-2.97001	0.665571	non-significant	-9.92349	0.191291	non-significant	-2.94712	0.298723	non-significant	-1.06688	0.170281	non-significant
TBC1D3D	ENSG00000274419	None	2.24677	0.666341	non-significant	0.464093	0.757106	non-significant	-0.062686	0.913872	non-significant	1.86287	0.0666439	non-significant
HCN2	ENSG00000099822	None	1.42134	0.66902	non-significant	0.837374	0.486874	non-significant	-2.65401	0.000702306	down	-0.517674	0.176021	non-significant
CALHM6	ENSG00000188820	None	4.04743	0.670885	non-significant	6.13457	NA	non-significant	-0.430438	NA	non-significant	0.209446	0.955643	non-significant
DAAM1	ENSG00000100592	None	-1.1196	0.672164	non-significant	-1.27722	0.177067	non-significant	-0.631228	0.198054	non-significant	-1.79104	5.17187e-05	down
SH3GL2	ENSG00000107295	None	-1.76198	0.672164	non-significant	-2.30178	0.189292	non-significant	-3.83257	9.7723e-10	down	-1.11319	0.406941	non-significant
CDS1	ENSG00000163624	None	-1.79547	0.672164	non-significant	-1.48512	0.606945	non-significant	-0.912294	0.202922	non-significant	-1.8388	0.000409187	down
LINC01376	ENSG00000236204	None	-1.18323	0.672164	non-significant	-0.580301	0.84416	non-significant	1.0249	0.363929	non-significant	0.588485	0.824159	non-significant
NID2	ENSG00000087303	None	-2.61561	0.675795	non-significant	1.10564	0.356269	non-significant	0.166028	0.921769	non-significant	-1.35546	0.158098	non-significant
GLS	ENSG00000115419	None	1.02139	0.675795	non-significant	0.808304	0.590152	non-significant	0.56015	0.322595	non-significant	1.01867	0.00727085	up
CFAP52	ENSG00000166596	None	-2.94962	0.675795	non-significant	-0.336827	0.944553	non-significant	-0.696812	0.295336	non-significant	-1.60489	0.208856	non-significant
CDC42EP5	ENSG00000167617	None	1.28071	0.675795	non-significant	2.75071	0.000263022	up	0.537104	0.857479	non-significant	-0.729317	0.209595	non-significant
AC021066.1	ENSG00000170442	None	2.26223	0.675795	non-significant	0.798063	0.871279	non-significant	-0.98452	NA	non-significant	1.88169	0.00280961	up
CTSF	ENSG00000174080	None	-1.64854	0.675795	non-significant	1.05771	0.426576	non-significant	-1.96729	0.532094	non-significant	NA	NA	non-significant
TLK2P2	ENSG00000228828	None	3.19899	0.675795	non-significant	1.46168	0.742905	non-significant	3.67342	NA	non-significant	-0.441953	NA	non-significant
HNRNPKP3	ENSG00000251557	None	-6.19268	0.675837	non-significant	NA	NA	non-significant	-0.32215	NA	non-significant	0.14022	NA	non-significant
AL109659.2	ENSG00000272491	None	-1.62999	0.675837	non-significant	-1.37252	0.535662	non-significant	-0.486435	0.784862	non-significant	-0.611015	0.696771	non-significant
LEMD1	ENSG00000186007	None	-2.83135	0.67611	non-significant	0.298431	0.967097	non-significant	-4.82554	0.012474	down	0.647578	0.808525	non-significant
LARP6	ENSG00000166173	None	1.46088	0.677435	non-significant	0.546631	0.763194	non-significant	0.153106	0.867933	non-significant	0.175072	0.852551	non-significant
WEE2-AS1	ENSG00000228775	None	1.76537	0.677435	non-significant	0.689061	0.485899	non-significant	1.0917	0.0558432	non-significant	0.485588	0.678223	non-significant
CCDC146	ENSG00000135205	None	-1.5591	0.678782	non-significant	0.265643	0.892663	non-significant	0.0722675	0.936079	non-significant	0.272798	0.731975	non-significant
AC078993.1	ENSG00000238178	None	-5.91845	0.678782	non-significant	-1.21657	NA	non-significant	1.90817	NA	non-significant	NA	NA	non-significant
ABCB11	ENSG00000073734	None	-2.04778	0.679706	non-significant	-2.59159	0.127676	non-significant	-2.80856	0.00244103	down	0.913906	0.706151	non-significant
DNAAF1	ENSG00000154099	None	-2.98274	0.679706	non-significant	0.233407	0.963489	non-significant	-0.959142	0.040645	down	0.0122009	0.995173	non-significant
LINC02393	ENSG00000256597	None	-6.85392	0.679706	non-significant	-2.44277	NA	non-significant	NA	NA	non-significant	1.10166	NA	non-significant
EPOP	ENSG00000273604	None	1.10045	0.679706	non-significant	0.0425069	0.991579	non-significant	-2.18975	0.00622758	down	-0.404298	0.551951	non-significant
MCF2	ENSG00000101977	None	-1.77843	0.679743	non-significant	0.91843	0.617483	non-significant	1.67015	0.0344358	up	-0.0861771	0.962181	non-significant
NME8	ENSG00000086288	None	5.72136	0.682287	non-significant	1.81559	NA	non-significant	4.71519	NA	non-significant	-1.31825	NA	non-significant
CNTF	ENSG00000242689	None	-1.4407	0.682287	non-significant	-0.557797	0.737531	non-significant	0.209179	0.883484	non-significant	-0.121589	0.916289	non-significant
ANKRD66	ENSG00000230062	None	-5.40908	0.684802	non-significant	-1.44322	NA	non-significant	-1.48583	0.391618	non-significant	-1.83942	NA	non-significant
TMEM178A	ENSG00000152154	None	1.0573	0.685192	non-significant	0.325908	0.787367	non-significant	0.358797	0.576229	non-significant	1.02919	0.277903	non-significant
ANKRD36BP2	ENSG00000230006	None	-3.48262	0.685192	non-significant	0.00476066	0.999105	non-significant	-2.41311	0.21187	non-significant	-1.26087	NA	non-significant
U73166.1	ENSG00000230454	None	1.25177	0.688156	non-significant	0.0902672	0.972268	non-significant	0.348879	0.819672	non-significant	1.51341	0.158459	non-significant
CLDN6	ENSG00000184697	None	-2.77625	0.688519	non-significant	-1.89155	0.0772839	non-significant	-0.794603	NA	non-significant	-0.721338	0.622952	non-significant
FZD10-AS1	ENSG00000250208	None	-6.83597	0.688519	non-significant	-4.10933	0.491071	non-significant	-8.59336	0.000250493	down	-1.8757	0.257119	non-significant
SFRP2	ENSG00000145423	None	2.76323	0.688568	non-significant	0.529599	0.966719	non-significant	0.750735	0.563631	non-significant	-1.35523	0.0109115	down
C11orf52	ENSG00000149300	None	5.72496	0.688568	non-significant	-4.39811	NA	non-significant	1.22422	NA	non-significant	-1.51183	0.584237	non-significant
ATP23	ENSG00000166896	None	1.25809	0.688568	non-significant	-1.12626	0.468768	non-significant	-0.177966	0.886452	non-significant	0.453859	0.402571	non-significant
RPTN	ENSG00000215853	None	5.72347	0.688568	non-significant	-2.06661	NA	non-significant	NA	NA	non-significant	NA	NA	non-significant
MAPK8IP1P1	ENSG00000262500	None	-4.6127	0.688889	non-significant	0.216646	0.979658	non-significant	-1.6385	NA	non-significant	NA	NA	non-significant
TTC6	ENSG00000139865	None	2.83081	0.691187	non-significant	-3.58492	0.166615	non-significant	-1.47662	0.110103	non-significant	-2.36815	0.104472	non-significant
ZNF248	ENSG00000198105	None	2.99039	0.691187	non-significant	1.31737	0.884695	non-significant	6.30153	1.24263e-27	up	-0.64493	0.0430838	down
PCDHGA6	ENSG00000253731	None	-1.45572	0.691187	non-significant	0.177774	0.95424	non-significant	-1.06701	0.526598	non-significant	0.178358	0.948449	non-significant
ARHGAP22	ENSG00000128805	None	-1.32328	0.692547	non-significant	0.199922	0.934028	non-significant	1.89625	0.00887477	up	0.33382	0.707329	non-significant
ISL2	ENSG00000159556	None	2.75531	0.692547	non-significant	-0.0313017	0.995434	non-significant	1.18684	NA	non-significant	NA	NA	non-significant
TSPEAR-AS2	ENSG00000182912	None	1.70935	0.692547	non-significant	0.14699	0.987022	non-significant	-0.742925	0.655783	non-significant	-0.222559	0.845444	non-significant
AC023024.2	ENSG00000279970	None	-4.53451	0.693327	non-significant	-0.987786	0.817335	non-significant	0.133639	0.961652	non-significant	-1.35313	0.33382	non-significant
AC005332.4	ENSG00000274712	None	-1.31008	0.694713	non-significant	-0.383613	0.806184	non-significant	-0.492289	0.41325	non-significant	-0.367447	0.575264	non-significant
CDH3	ENSG00000062038	None	-2.85681	0.695595	non-significant	-0.390404	0.95264	non-significant	-0.728809	0.645735	non-significant	-3.44351	9.90045e-09	down
SNAI1	ENSG00000124216	None	0.987714	0.695595	non-significant	0.553943	0.689684	non-significant	-0.092588	0.949664	non-significant	1.0105	0.0639604	non-significant
TM6SF1	ENSG00000136404	None	2.01296	0.695595	non-significant	-0.68723	0.912358	non-significant	0.800491	NA	non-significant	0.565985	0.790064	non-significant
C22orf42	ENSG00000205856	None	-3.2542	0.695595	non-significant	-3.38819	NA	non-significant	-5.14546	0.00639696	down	NA	NA	non-significant
AL157373.2	ENSG00000229896	None	-3.01291	0.695595	non-significant	0.873654	NA	non-significant	2.67256	NA	non-significant	-0.515489	0.794247	non-significant
SCN1A-AS1	ENSG00000236107	None	-2.84312	0.695595	non-significant	-3.34487	0.0636547	non-significant	-5.93001	0.0106234	down	0.519832	NA	non-significant
AL135791.1	ENSG00000236514	None	3.66993	0.695595	non-significant	1.73712	0.752259	non-significant	4.73385	NA	non-significant	-1.22777	0.542054	non-significant
AC008083.2	ENSG00000257925	None	5.61675	0.695595	non-significant	1.68962	NA	non-significant	NA	NA	non-significant	0.519832	NA	non-significant
FUT3	ENSG00000171124	None	1.91169	0.695744	non-significant	0.742604	NA	non-significant	-3.95287	0.051505	non-significant	0.519832	NA	non-significant
SPDYE16	ENSG00000185040	None	-5.6913	0.695744	non-significant	-1.09792	NA	non-significant	1.51828	NA	non-significant	-0.924163	NA	non-significant
ACHE	ENSG00000087085	None	1.00555	0.695943	non-significant	0.378318	0.849917	non-significant	-2.20729	0.0134316	down	-0.226157	0.784599	non-significant
U2AF1	ENSG00000160201	None	-1.01842	0.697487	non-significant	-0.610918	0.410591	non-significant	-0.127013	0.856011	non-significant	0.0611124	0.84332	non-significant
NKX2-2	ENSG00000125820	None	1.92519	0.698075	non-significant	-4.88758	0.000142584	down	-1.23952	0.382479	non-significant	NA	NA	non-significant
AL391056.1	ENSG00000227619	None	2.95635	0.698075	non-significant	2.44542	NA	non-significant	-0.253219	NA	non-significant	-0.441953	NA	non-significant
LRRCC1	ENSG00000133739	None	-1.38904	0.699005	non-significant	-1.97194	0.0150769	down	-0.79855	0.0511909	non-significant	0.348709	0.339816	non-significant
FAM166C	ENSG00000173557	None	-3.78441	0.699005	non-significant	-1.62064	NA	non-significant	-1.16026	NA	non-significant	0.222616	NA	non-significant
NR1D1	ENSG00000126368	None	1.33987	0.699378	non-significant	1.34179	0.293972	non-significant	-0.199623	0.867363	non-significant	-0.10741	0.810033	non-significant
ZNF391	ENSG00000124613	None	1.11025	0.699525	non-significant	-0.0362551	0.990343	non-significant	-0.309516	0.776069	non-significant	-0.258027	0.807165	non-significant
GATA3-AS1	ENSG00000197308	None	5.61372	0.699764	non-significant	-2.24597	NA	non-significant	0.265892	0.945722	non-significant	-0.978861	0.564554	non-significant
FGF10	ENSG00000070193	None	3.7622	0.700191	non-significant	0.859349	NA	non-significant	-4.18595	0.0622341	non-significant	-5.80472	7.22638e-08	down
CATIP	ENSG00000158428	None	-3.1509	0.700191	non-significant	-1.37439	0.532022	non-significant	0.766127	0.32923	non-significant	0.0389407	NA	non-significant
BHLHE22	ENSG00000180828	None	3.45533	0.700191	non-significant	-2.79471	0.660514	non-significant	-4.67738	0.00756727	down	-0.921859	NA	non-significant
MT1L	ENSG00000260549	None	-3.27398	0.700191	non-significant	4.36163	0.0842487	non-significant	NA	NA	non-significant	0.458373	0.899984	non-significant
AC092720.1	ENSG00000260750	None	2.54474	0.700191	non-significant	-0.913146	NA	non-significant	-1.10131	NA	non-significant	-0.441953	NA	non-significant
ZNF850	ENSG00000267041	None	-0.95225	0.706346	non-significant	-1.76977	0.113294	non-significant	-1.00764	0.294667	non-significant	2.18887	0.000559711	up
LARGE2	ENSG00000165905	None	-3.08268	0.70635	non-significant	-0.440694	NA	non-significant	-1.27884	NA	non-significant	0.767522	0.715141	non-significant
SLC29A1	ENSG00000112759	None	1.07646	0.707054	non-significant	-0.280541	0.895524	non-significant	-2.37894	0.0108008	down	1.76562	0.000709978	up
DOC2B	ENSG00000272636	None	-2.00507	0.707054	non-significant	-2.30016	0.102689	non-significant	-3.82195	1.72308e-20	down	-0.262482	0.908451	non-significant
ZMYND10	ENSG00000004838	None	-2.53905	0.713543	non-significant	-0.44603	0.763289	non-significant	-0.102806	0.911523	non-significant	-0.526045	0.586297	non-significant
HK2	ENSG00000159399	None	1.17275	0.714997	non-significant	-0.581535	0.660514	non-significant	-1.37304	0.000174559	down	1.29908	0.00539718	up
GRM8	ENSG00000179603	None	-1.402	0.714997	non-significant	2.2799	NA	non-significant	-3.52058	0.0899084	non-significant	-0.136487	0.935748	non-significant
AL122058.1	ENSG00000226308	None	-2.62514	0.714997	non-significant	-1.15874	0.775812	non-significant	-0.879928	0.775311	non-significant	-1.89222	0.637539	non-significant
LINC01686	ENSG00000261504	None	1.41428	0.714997	non-significant	-1.45625	0.477844	non-significant	-2.47522	0.310898	non-significant	3.23031	NA	non-significant
VCAM1	ENSG00000162692	None	-1.75582	0.717752	non-significant	-0.829495	0.713567	non-significant	-1.08212	0.0580502	non-significant	-1.80218	0.000709978	down
CFAP47	ENSG00000165164	None	-2.77502	0.717752	non-significant	0.841304	0.787451	non-significant	-0.918018	0.319628	non-significant	-5.02411	4.99883e-05	down
AC021683.2	ENSG00000267506	None	-3.80099	0.717752	non-significant	-0.471564	NA	non-significant	-3.18168	NA	non-significant	0.339888	NA	non-significant
TRPV4	ENSG00000111199	None	1.8887	0.72142	non-significant	0.519777	0.935532	non-significant	3.35313	NA	non-significant	-0.190936	0.877677	non-significant
SMIM34A	ENSG00000243627	None	-3.6105	0.721521	non-significant	1.81259	NA	non-significant	2.37519	NA	non-significant	NA	NA	non-significant
MAP2	ENSG00000078018	None	-1.08591	0.722327	non-significant	-2.38185	0.0294867	down	-0.228037	0.670789	non-significant	-0.662999	0.395036	non-significant
MYH7	ENSG00000092054	None	-1.17583	0.722327	non-significant	-0.134181	0.970477	non-significant	0.534992	0.548876	non-significant	-2.86902	0.00268506	down
GOPC	ENSG00000047932	None	1.25402	0.722818	non-significant	0.407449	0.837288	non-significant	0.119453	0.82982	non-significant	0.466263	0.107381	non-significant
DSC3	ENSG00000134762	None	-2.16023	0.722818	non-significant	1.57077	0.433103	non-significant	0.26777	0.847146	non-significant	-0.664085	0.688497	non-significant
MAP3K5	ENSG00000197442	None	0.926892	0.722818	non-significant	-1.22309	0.604369	non-significant	-0.169533	0.897149	non-significant	-0.182135	0.919602	non-significant
FGF7P3	ENSG00000204837	None	-2.156	0.722818	non-significant	0.0392509	0.987139	non-significant	0.853798	0.285135	non-significant	0.938129	0.132741	non-significant
AC104135.1	ENSG00000236209	None	2.91543	0.722818	non-significant	-0.745006	NA	non-significant	-0.961394	NA	non-significant	1.00073	NA	non-significant
TSIX	ENSG00000270641	None	3.1896	0.723121	non-significant	-0.735655	0.742882	non-significant	0.130853	0.970011	non-significant	-0.46346	0.859705	non-significant
PRPH	ENSG00000135406	None	-2.89927	0.72616	non-significant	-3.91816	0.00886584	down	-0.161904	0.893314	non-significant	-1.50834	0.589126	non-significant
PCED1B	ENSG00000179715	None	1.52262	0.72616	non-significant	1.50555	0.432674	non-significant	-2.79627	0.115114	non-significant	0.778858	0.0958111	non-significant
IFNE	ENSG00000184995	None	2.83022	0.72616	non-significant	2.81894	0.110016	non-significant	-4.50544	0.0925484	non-significant	0.816254	0.71211	non-significant
AC063952.1	ENSG00000240661	None	-3.94892	0.72616	non-significant	0.155911	NA	non-significant	-6.7205	0.226811	non-significant	NA	NA	non-significant
CU633904.2	ENSG00000276077	None	-2.07042	0.72616	non-significant	-5.79485	0.622758	non-significant	-2.19295	0.0109205	down	3.67147	0.46691	non-significant
LMX1A	ENSG00000162761	None	-5.68919	0.726898	non-significant	3.39746	NA	non-significant	1.26605	NA	non-significant	-6.57851	7.80989e-08	down
ENPP2	ENSG00000136960	None	-1.9052	0.72828	non-significant	1.62178	0.563399	non-significant	-1.32525	0.0697782	non-significant	-0.905437	0.010704	down
PIH1D2	ENSG00000150773	None	-1.34085	0.72828	non-significant	-0.685027	0.758794	non-significant	0.0598323	0.967071	non-significant	-0.516592	0.584347	non-significant
CRABP2	ENSG00000143320	None	-2.24913	0.728808	non-significant	1.40861	0.493524	non-significant	-1.89713	0.132633	non-significant	0.743064	0.084385	non-significant
AC016152.1	ENSG00000258312	None	-5.23307	0.730644	non-significant	1.0279	0.898261	non-significant	3.3058	NA	non-significant	0.0389407	NA	non-significant
TSPAN2	ENSG00000134198	None	1.25527	0.731575	non-significant	3.19526	0.0876648	non-significant	0.251768	0.719418	non-significant	-0.197089	0.832605	non-significant
CSMD2	ENSG00000121904	None	1.67556	0.731657	non-significant	-2.35007	0.213822	non-significant	-5.19272	3.17074e-13	down	3.36256	0.000462826	up
STOX1	ENSG00000165730	None	-2.03789	0.731657	non-significant	-1.85158	0.442433	non-significant	0.0696496	0.956039	non-significant	-0.607369	0.679736	non-significant
SLC4A11	ENSG00000088836	None	-1.14524	0.732939	non-significant	0.608219	0.786134	non-significant	4.67139	7.70163e-11	up	-0.737511	0.409473	non-significant
RUBCNL	ENSG00000102445	None	1.72383	0.732939	non-significant	-0.97767	0.784926	non-significant	-0.63651	0.767987	non-significant	0.290312	0.868439	non-significant
SCNN1A	ENSG00000111319	None	-2.30538	0.732939	non-significant	0.473595	0.963489	non-significant	2.77794	0.335215	non-significant	-1.42213	0.640669	non-significant
ABCG1	ENSG00000160179	None	1.1428	0.732939	non-significant	-3.05457	0.0438185	down	-1.49255	0.0520567	non-significant	-0.439556	0.532853	non-significant
ANKRD30BL	ENSG00000163046	None	-4.78305	0.732939	non-significant	0.386677	NA	non-significant	NA	NA	non-significant	1.00073	NA	non-significant
NEB	ENSG00000183091	None	1.12343	0.732939	non-significant	0.360077	0.88013	non-significant	0.313551	0.785646	non-significant	0.0710385	0.967095	non-significant
NELL2	ENSG00000184613	None	-1.05776	0.732939	non-significant	-7.02422	0.0715394	non-significant	-0.422339	0.457637	non-significant	-1.72298	0.000244804	down
CFAP73	ENSG00000186710	None	-2.9037	0.732939	non-significant	-1.66591	0.290018	non-significant	0.670638	0.663222	non-significant	0.488107	NA	non-significant
EPOR	ENSG00000187266	None	1.22892	0.732939	non-significant	0.543301	0.756074	non-significant	-0.102518	0.956248	non-significant	0.0417426	0.967095	non-significant
LINC02802	ENSG00000232527	None	-1.34804	0.732939	non-significant	1.70636	0.0376318	up	-1.12975	0.435046	non-significant	0.0189974	0.983284	non-significant
AC104964.1	ENSG00000253641	None	-1.16412	0.732939	non-significant	-2.69836	0.00528299	down	-0.562087	0.525212	non-significant	-1.79051	0.30977	non-significant
NIBAN1	ENSG00000135842	None	1.554	0.733071	non-significant	0.280691	0.901328	non-significant	2.59793	5.99588e-17	up	0.882386	0.157517	non-significant
LINC01361	ENSG00000236268	None	1.93344	0.733071	non-significant	-1.39669	0.838856	non-significant	3.39529	NA	non-significant	1.41562	NA	non-significant
GPR50	ENSG00000102195	None	-2.90927	0.733959	non-significant	-4.87522	NA	non-significant	-2.57533	0.371118	non-significant	-2.60633	0.157993	non-significant
AC067773.1	ENSG00000270866	None	-1.23392	0.738485	non-significant	-3.24409	6.80645e-08	down	-2.49393	0.0604358	non-significant	3.15976	0.007523	up
PLBD1	ENSG00000121316	None	-1.61651	0.739883	non-significant	-0.845269	NA	non-significant	NA	NA	non-significant	0.990443	0.273901	non-significant
UCP1	ENSG00000109424	None	2.73662	0.741933	non-significant	4.76182	0.0363803	up	1.18684	NA	non-significant	NA	NA	non-significant
PMEPA1	ENSG00000124225	None	1.08207	0.743124	non-significant	1.98605	0.075441	non-significant	1.02325	0.397616	non-significant	0.242423	0.757701	non-significant
LINC02541	ENSG00000230943	None	1.93188	0.745692	non-significant	-1.96694	0.196683	non-significant	-1.43156	0.620974	non-significant	2.22379	0.0614544	non-significant
MIR222HG	ENSG00000270069	None	-1.15927	0.746085	non-significant	-0.612456	0.607052	non-significant	2.01128	0.000152298	up	-0.552009	0.568426	non-significant
DDR2	ENSG00000162733	None	1.62704	0.746336	non-significant	2.24766	0.106482	non-significant	-0.0356859	0.981213	non-significant	-0.327713	0.653795	non-significant
FSIP2	ENSG00000188738	None	-1.00529	0.747227	non-significant	-2.67412	0.0164217	down	-0.461105	0.641869	non-significant	-1.08753	0.190471	non-significant
PDZD2	ENSG00000133401	None	-2.36647	0.748278	non-significant	1.54626	0.0593606	non-significant	-1.47979	0.288433	non-significant	1.07608	0.124171	non-significant
SEZ6L2	ENSG00000174938	None	1.04951	0.75054	non-significant	0.651512	0.773776	non-significant	-0.806466	0.10916	non-significant	1.29675	4.27813e-06	up
AL136295.1	ENSG00000254692	None	-3.55987	0.753505	non-significant	-0.635752	0.946977	non-significant	-5.03343	NA	non-significant	1.61076	0.796898	non-significant
HOXC8	ENSG00000037965	None	4.14328	0.756896	non-significant	0.373335	NA	non-significant	-4.10969	0.322595	non-significant	NA	NA	non-significant
SPDYE18	ENSG00000205482	None	5.63834	0.756896	non-significant	NA	NA	non-significant	4.85623	NA	non-significant	3.65876	0.294819	non-significant
LERFS	ENSG00000234665	None	-2.28461	0.756896	non-significant	-1.31983	0.49241	non-significant	0.808016	0.638873	non-significant	-3.09608	NA	non-significant
RBMXL1	ENSG00000213516	None	-0.914672	0.75774	non-significant	-0.377284	0.758134	non-significant	0.0623425	0.94054	non-significant	-0.258043	0.528212	non-significant
LRRC37A2	ENSG00000238083	None	-1.40993	0.760088	non-significant	0.281565	0.916137	non-significant	-0.448957	0.6014	non-significant	-0.789465	0.00220838	down
FIBIN	ENSG00000176971	None	1.1398	0.760669	non-significant	-0.00965031	0.997115	non-significant	4.42247	5.63025e-12	up	-0.443338	0.446538	non-significant
TTC23L	ENSG00000205838	None	-2.23631	0.760669	non-significant	-1.36036	0.327243	non-significant	0.71022	0.445628	non-significant	-0.877653	0.49104	non-significant
SESN2	ENSG00000130766	None	1.26853	0.761399	non-significant	0.305316	0.847798	non-significant	0.108449	0.863333	non-significant	0.470466	0.028226	up
EPS8L1	ENSG00000131037	None	-1.64657	0.761399	non-significant	-1.84497	0.143851	non-significant	-1.19174	0.425181	non-significant	1.34758	0.10916	non-significant
CCDC175	ENSG00000151838	None	-4.66454	0.761399	non-significant	-1.18327	NA	non-significant	1.18385	NA	non-significant	-0.0361343	NA	non-significant
SH3TC2	ENSG00000169247	None	-2.17857	0.761399	non-significant	1.23817	0.30082	non-significant	1.50301	0.303345	non-significant	-1.08494	0.26212	non-significant
ZFP36L1	ENSG00000185650	None	0.9671	0.761399	non-significant	0.287658	0.841108	non-significant	0.172452	0.785646	non-significant	0.290987	0.169513	non-significant
AL078590.2	ENSG00000232310	None	2.87736	0.761399	non-significant	-1.83457	0.607052	non-significant	2.05349	NA	non-significant	0.0255349	0.992453	non-significant
AC092127.2	ENSG00000270124	None	-1.85524	0.761399	non-significant	-0.568747	0.915586	non-significant	0.264795	0.944631	non-significant	-1.65824	0.0321166	down
AC010359.3	ENSG00000286314	None	-2.21772	0.761399	non-significant	-0.851722	0.374163	non-significant	0.383541	NA	non-significant	0.519832	NA	non-significant
RUNDC3B	ENSG00000105784	None	-2.07695	0.761877	non-significant	-0.174397	0.983334	non-significant	-5.65221	3.27241e-07	down	1.48371	0.286622	non-significant
HOXD9	ENSG00000128709	None	1.55777	0.761877	non-significant	-1.25735	0.893845	non-significant	0.345665	NA	non-significant	-1.47568	NA	non-significant
TYMP	ENSG00000025708	None	1.57845	0.762102	non-significant	-0.0372849	0.991527	non-significant	-0.371426	0.83078	non-significant	-1.41484	0.134261	non-significant
RPSAP41	ENSG00000239626	None	6.64287	0.762102	non-significant	-0.361914	0.972224	non-significant	0.128217	0.966887	non-significant	-0.376459	0.891115	non-significant
FOXD3	ENSG00000187140	None	-4.22529	0.766795	non-significant	-3.09672	NA	non-significant	-1.99743	NA	non-significant	1.95203	NA	non-significant
BHLHE41	ENSG00000123095	None	1.36474	0.767164	non-significant	1.81087	0.0152262	up	-0.052232	0.972562	non-significant	-1.13517	0.110126	non-significant
VGLL3	ENSG00000206538	None	-2.00772	0.768964	non-significant	1.79549	0.402237	non-significant	1.35862	0.00388919	up	0.830579	0.388355	non-significant
NFATC2	ENSG00000101096	None	-1.68695	0.769528	non-significant	1.23949	0.0589138	non-significant	-0.157382	0.94177	non-significant	1.13862	0.221476	non-significant
TSPAN18	ENSG00000157570	None	1.21338	0.769528	non-significant	-1.78841	0.326154	non-significant	-2.14578	0.00400053	down	-1.42814	0.148734	non-significant
SH3BGR	ENSG00000185437	None	2.05845	0.769528	non-significant	1.00434	0.62409	non-significant	0.289085	0.862564	non-significant	2.42436	0.0105202	up
DNAH6	ENSG00000115423	None	-2.16557	0.770866	non-significant	-1.4737	0.13317	non-significant	0.657406	0.191092	non-significant	-0.678517	0.721681	non-significant
TBC1D3E	ENSG00000278599	None	6.64857	0.77092	non-significant	NA	NA	non-significant	NA	NA	non-significant	NA	NA	non-significant
[truncated: 58,678 more rows]

## Sheet: S4. ALS A1 overlap
			ALS vs CTRL				A1 vs A0					Table S4. Differential gene expression in ALS meta-analysis and A1 hiPSC astrocytes
gene_name	ensembl	overlap	log2FC	pvalue	FDR	direction	log2FC	pvalue	FDR	direction		log2FC: log2 Fold Change in ALS mutant vs control or A1 vs A0
IGFBP3	ENSG00000146674	overlapping up	3.03308	8.70186e-20	4.77819e-16	up	1.056	0.000669769	0.00238095	up		pvalue: unadjusted P value
ERAP2	ENSG00000164308	overlapping up	3.24816	4.88246e-17	1.34048e-13	up	1.89113	7.14812e-14	1.26627e-12	up		FDR: false discovery rate (adjusted P value)
PLOD2	ENSG00000152952	overlapping up	1.84938	3.03004e-16	6.65519e-13	up	0.91427	0.000491479	0.00181023	up
TGOLN2	ENSG00000152291	overlapping up	0.509941	5.40925e-14	5.40039e-11	up	0.453098	3.3196e-28	2.03008e-26	up
FILIP1L	ENSG00000168386	overlapping up	2.22588	4.6568e-13	3.78822e-10	up	1.52592	0.000486389	0.00179274	up
EFR3A	ENSG00000132294	overlapping up	0.728781	6.49044e-13	4.91573e-10	up	0.428137	0.000244875	0.000967226	up
TNC	ENSG00000041982	overlapping up	1.32689	1.04936e-11	5.48763e-09	up	1.26433	2.36216e-10	2.6745e-09	up
LOX	ENSG00000113083	overlapping up	2.23233	2.91737e-11	1.28154e-08	up	0.986175	4.41964e-07	2.99311e-06	up
P4HA1	ENSG00000122884	overlapping up	0.961034	5.48513e-11	2.0793e-08	up	1.24066	5.27937e-12	7.45182e-11	up
SLC16A1	ENSG00000155380	overlapping up	0.623503	1.03876e-10	3.35518e-08	up	0.725392	1.61144e-06	9.8146e-06	up
FOXP1	ENSG00000114861	overlapping up	1.21511	1.31444e-10	4.06625e-08	up	0.813639	0.00825244	0.0224069	up
GALNT2	ENSG00000143641	overlapping up	0.860233	1.7287e-10	5.06255e-08	up	0.418987	0.000105128	0.000448281	up
SEMA3C	ENSG00000075223	overlapping up	1.28246	2.06321e-10	5.73626e-08	up	1.68119	3.26364e-07	2.2662e-06	up
FNDC3B	ENSG00000075420	overlapping up	0.730875	8.41816e-10	1.92601e-07	up	1.16455	2.72508e-39	3.44567e-37	up
P4HA2	ENSG00000072682	overlapping up	1.43618	1.36385e-09	2.826e-07	up	1.2292	2.42893e-07	1.71479e-06	up
MSC-AS1	ENSG00000235531	overlapping up	3.21684	1.37791e-09	2.82846e-07	up	3.88717	2.44073e-19	7.53485e-18	up
XBP1	ENSG00000100219	overlapping up	0.631024	1.44048e-09	2.90263e-07	up	1.90242	1.97716e-15	4.08509e-14	up
SERPINH1	ENSG00000149257	overlapping up	1.07755	2.54249e-09	4.65361e-07	up	0.595454	1.39004e-13	2.37477e-12	up
ANXA5	ENSG00000164111	overlapping up	0.767046	4.67342e-09	7.60348e-07	up	0.388822	0.0180464	0.0444393	up
MYH11	ENSG00000133392	overlapping up	3.14233	6.12355e-09	9.53884e-07	up	3.5178	0.00039668	0.00149417	up
FAM162A	ENSG00000114023	overlapping up	0.638266	9.88562e-09	1.43793e-06	up	0.713999	0.00995968	0.0264706	up
RRBP1	ENSG00000125844	overlapping up	1.02635	1.05645e-08	1.50674e-06	up	0.61223	0.000160617	0.000660354	up
P4HB	ENSG00000185624	overlapping up	0.67627	1.24461e-08	1.69749e-06	up	0.554957	1.61894e-14	3.07424e-13	up
KLHDC7B	ENSG00000130487	overlapping up	2.86582	1.45812e-08	1.92928e-06	up	3.74774	0.00611375	0.0171993	up
COL5A1	ENSG00000130635	overlapping up	1.44353	3.52655e-08	4.18687e-06	up	0.662289	0.01132	0.0296201	up
HSPB1	ENSG00000106211	overlapping up	1.16965	3.7105e-08	4.35815e-06	up	0.438248	4.55299e-05	0.000210605	up
MSC	ENSG00000178860	overlapping up	3.62002	3.98221e-08	4.60343e-06	up	5.9598	6.05898e-74	2.90776e-71	up
PDIA3	ENSG00000167004	overlapping up	0.626423	5.12847e-08	5.74779e-06	up	0.805707	2.06136e-25	1.05139e-23	up
VDR	ENSG00000111424	overlapping up	1.74714	5.56965e-08	6.17838e-06	up	3.14801	5.95338e-14	1.06086e-12	up
FN1	ENSG00000115414	overlapping up	2.57337	5.95988e-08	6.51257e-06	up	2.34844	5.40166e-07	3.58346e-06	up
FERMT1	ENSG00000101311	overlapping up	2.46809	7.67778e-08	8.14661e-06	up	0.818422	0.0121836	0.031559	up
CHPF2	ENSG00000033100	overlapping up	0.673111	8.12791e-08	8.39535e-06	up	0.691868	8.12136e-14	1.42671e-12	up
IGF2R	ENSG00000197081	overlapping up	0.415058	1.05266e-07	1.01853e-05	up	0.450196	0.00243284	0.00756359	up
IMPAD1	ENSG00000104331	overlapping up	0.40854	1.06379e-07	1.02478e-05	up	0.276471	0.00149852	0.00489068	up
KDELR2	ENSG00000136240	overlapping up	0.689478	1.22113e-07	1.14619e-05	up	0.352674	0.000386395	0.00145829	up
GDNF	ENSG00000168621	overlapping up	3.12827	1.49478e-07	1.34474e-05	up	4.44471	1.06622e-05	5.56872e-05	up
SSR3	ENSG00000114850	overlapping up	0.596609	1.57492e-07	1.38366e-05	up	0.359416	6.47853e-06	3.53764e-05	up
TMEM51	ENSG00000171729	overlapping up	1.29661	1.75932e-07	1.50944e-05	up	0.785292	1.21962e-13	2.10232e-12	up
MMP13	ENSG00000137745	overlapping up	2.44097	1.80466e-07	1.53565e-05	up	4.6326	2.15675e-08	1.81799e-07	up
B4GALT1	ENSG00000086062	overlapping up	1.14599	1.81084e-07	1.53565e-05	up	2.8254	3.97864e-22	1.5472e-20	up
LCTL	ENSG00000188501	overlapping up	1.69622	1.84044e-07	1.53702e-05	up	0.690693	0.000975546	0.00333705	up
INHBA	ENSG00000122641	overlapping up	2.21841	2.10443e-07	1.73115e-05	up	2.51637	1.35211e-10	1.58529e-09	up
SEC61A1	ENSG00000058262	overlapping up	0.478247	5.89783e-07	3.99686e-05	up	0.528484	4.65395e-15	9.27978e-14	up
ALDOA	ENSG00000149925	overlapping up	0.690001	6.17181e-07	4.0954e-05	up	0.507757	6.17726e-05	0.000278181	up
MOGS	ENSG00000115275	overlapping up	0.693104	6.41684e-07	4.21975e-05	up	0.703998	1.11614e-14	2.15631e-13	up
LIMK2	ENSG00000182541	overlapping up	0.619574	6.4809e-07	4.24915e-05	up	1.67009	4.14386e-10	4.51738e-09	up
SLC16A3	ENSG00000141526	overlapping up	2.13102	7.9454e-07	5.07305e-05	up	3.46858	2.66459e-12	3.88574e-11	up
FAM83H	ENSG00000180921	overlapping up	1.44881	1.17794e-06	7.08827e-05	up	1.21098	0.00612478	0.017228	up
BET1L	ENSG00000177951	overlapping up	0.471087	1.47375e-06	8.56335e-05	up	0.37006	0.0016717	0.00539668	up
HACD2	ENSG00000206527	overlapping up	0.712319	1.5417e-06	8.84123e-05	up	0.291861	0.0193395	0.0472124	up
ITGA5	ENSG00000161638	overlapping up	1.56463	1.65879e-06	9.37079e-05	up	1.77545	3.57111e-18	9.64292e-17	up
NFASC	ENSG00000163531	overlapping up	1.27839	1.6822e-06	9.44959e-05	up	0.356286	0.00492337	0.0142025	up
SEC24D	ENSG00000150961	overlapping up	1.07886	1.7032e-06	9.49472e-05	up	0.760577	6.51402e-06	3.55518e-05	up
TNFSF10	ENSG00000121858	overlapping up	3.00449	1.77615e-06	9.82651e-05	up	6.31048	4.02974e-21	1.45956e-19	up
ELN	ENSG00000049540	overlapping up	2.01611	2.06568e-06	0.000111476	up	1.36436	0.0126155	0.032542	up
ITIH5	ENSG00000123243	overlapping up	1.62901	2.17415e-06	0.000115625	up	2.43808	0.00144655	0.00474012	up
ADPRH	ENSG00000144843	overlapping up	1.74471	2.62854e-06	0.000133952	up	2.15237	2.07349e-10	2.36926e-09	up
TXNDC5	ENSG00000239264	overlapping up	0.530903	3.1058e-06	0.000150277	up	0.200152	0.00240603	0.00748794	up
IER3	ENSG00000137331	overlapping up	1.28369	3.10625e-06	0.000150277	up	3.89484	3.09482e-24	1.43943e-22	up
CKAP4	ENSG00000136026	overlapping up	0.731505	3.45294e-06	0.000165591	up	1.3693	1.03689e-20	3.59524e-19	up
SERPINE1	ENSG00000106366	overlapping up	1.90073	3.66824e-06	0.00017364	up	0.987434	0.00109873	0.00371511	up
ARAF	ENSG00000078061	overlapping up	0.44022	4.05937e-06	0.000190921	up	0.306153	0.000819535	0.00285378	up
DNAJB9	ENSG00000128590	overlapping up	0.575155	4.09353e-06	0.000191707	up	0.8832	5.42832e-12	7.65182e-11	up
SPSB1	ENSG00000171621	overlapping up	1.13719	4.40403e-06	0.000202788	up	2.2757	1.40625e-18	3.98047e-17	up
ABCC3	ENSG00000108846	overlapping up	2.33133	4.41764e-06	0.00020299	up	0.942854	0.000165696	0.000678859	up
SNX11	ENSG00000002919	overlapping up	0.412649	4.8072e-06	0.000217702	up	1.12518	2.028e-07	1.45262e-06	up
C5orf15	ENSG00000113583	overlapping up	0.555746	4.8329e-06	0.000218415	up	0.677154	0.0004035	0.00151769	up
NIBAN1	ENSG00000135842	overlapping up	1.34589	5.17715e-06	0.00023112	up	1.94278	6.11514e-14	1.08693e-12	up
TMEM214	ENSG00000119777	overlapping up	0.479876	5.50339e-06	0.000244195	up	0.438793	6.99245e-05	0.000310913	up
FOXO3	ENSG00000118689	overlapping up	0.435777	5.59816e-06	0.000247899	up	0.530242	0.000551161	0.00200384	up
TBC1D10A	ENSG00000099992	overlapping up	0.828004	5.75892e-06	0.000253683	up	0.992005	2.74341e-06	1.61005e-05	up
NNMT	ENSG00000166741	overlapping up	1.55583	5.8419e-06	0.000256111	up	2.45683	2.36204e-10	2.6745e-09	up
HTATIP2	ENSG00000109854	overlapping up	1.25426	6.17142e-06	0.000266305	up	0.900747	2.17201e-05	0.000106586	up
SYNGR2	ENSG00000108639	overlapping up	1.02102	7.12721e-06	0.000298175	up	1.47185	2.46753e-13	4.11242e-12	up
F8A1	ENSG00000277203	overlapping up	0.844517	8.23427e-06	0.000334302	up	0.235925	0.014052	0.0357409	up
TMEM39A	ENSG00000176142	overlapping up	0.665831	8.2818e-06	0.000334993	up	0.654492	4.1249e-05	0.000192234	up
ADM2	ENSG00000128165	overlapping up	1.45372	9.2904e-06	0.000368329	up	4.66116	1.51062e-17	3.84316e-16	up
CD164	ENSG00000135535	overlapping up	0.572069	9.71006e-06	0.000378813	up	0.720902	5.45845e-06	3.0276e-05	up
HSPA5	ENSG00000044574	overlapping up	0.534476	1.18141e-05	0.000449715	up	1.44712	7.29647e-37	8.06661e-35	up
ARSJ	ENSG00000180801	overlapping up	1.19995	1.20161e-05	0.000454255	up	1.691	1.0035e-11	1.36533e-10	up
BNIP3	ENSG00000176171	overlapping up	0.992046	1.24623e-05	0.000468657	up	1.0741	3.38219e-05	0.000160203	up
LINC01239	ENSG00000234840	overlapping up	1.19248	1.26425e-05	0.000473048	up	1.88405	0.000421663	0.00157786	up
EEF1AKMT4	ENSG00000284753	overlapping up	0.862801	1.34733e-05	0.000493211	up	1.08345	1.44953e-06	8.89256e-06	up
LRRC15	ENSG00000172061	overlapping up	1.84601	1.43434e-05	0.000517303	up	2.09779	0.00297175	0.00906375	up
HLA-C	ENSG00000204525	overlapping up	1.35938	1.60091e-05	0.000563906	up	1.76955	3.53148e-18	9.54812e-17	up
SIRPA	ENSG00000198053	overlapping up	1.40523	1.65177e-05	0.0005777	up	1.41825	2.10471e-14	3.93998e-13	up
LEF1	ENSG00000138795	overlapping up	1.27357	1.72638e-05	0.000598078	up	1.12146	2.34283e-08	1.96392e-07	up
PLOD3	ENSG00000106397	overlapping up	0.477959	1.779e-05	0.000611485	up	0.254993	2.89323e-05	0.000139102	up
HYOU1	ENSG00000149428	overlapping up	0.435936	1.88604e-05	0.000641254	up	1.34828	3.5431e-59	1.13358e-56	up
MYDGF	ENSG00000074842	overlapping up	0.56167	2.4186e-05	0.000781877	up	0.957286	1.58834e-32	1.33093e-30	up
SP140L	ENSG00000185404	overlapping up	1.38726	2.5128e-05	0.000803366	up	2.02867	1.27745e-08	1.11281e-07	up
FAM114A1	ENSG00000197712	overlapping up	0.919312	2.6453e-05	0.000831209	up	0.542633	0.000630935	0.00225734	up
HSPG2	ENSG00000142798	overlapping up	1.30289	2.77547e-05	0.000857391	up	1.63695	3.16464e-11	4.01832e-10	up
VEGFA	ENSG00000112715	overlapping up	0.811553	2.89083e-05	0.000883091	up	1.07961	5.34334e-05	0.000243799	up
CLINT1	ENSG00000113282	overlapping up	0.458254	2.90269e-05	0.000884313	up	0.618309	1.64204e-18	4.61082e-17	up
NR3C1	ENSG00000113580	overlapping up	0.847717	2.90289e-05	0.000884313	up	1.87442	2.42853e-23	1.04018e-21	up
AKT1S1	ENSG00000204673	overlapping up	0.449399	2.92205e-05	0.000888918	up	0.317055	5.79593e-05	0.000262745	up
SLC10A3	ENSG00000126903	overlapping up	0.878232	3.00691e-05	0.000912206	up	0.23007	0.0100512	0.0266702	up
SLC39A7	ENSG00000112473	overlapping up	0.317502	3.12189e-05	0.000942394	up	0.326588	0.00699955	0.0193941	up
MSN	ENSG00000147065	overlapping up	0.485903	3.22157e-05	0.000962701	up	0.750242	1.56525e-09	1.57465e-08	up
TMED9	ENSG00000184840	overlapping up	0.588558	3.31364e-05	0.000984856	up	0.745777	6.54734e-09	5.98501e-08	up
TAB3	ENSG00000157625	overlapping up	0.703521	3.57886e-05	0.00104668	up	0.792677	3.5816e-05	0.000168815	up
EDEM1	ENSG00000134109	overlapping up	0.623676	3.74561e-05	0.00108912	up	0.61558	0.00796136	0.0217176	up
ZDHHC9	ENSG00000188706	overlapping up	0.517516	3.74876e-05	0.00108912	up	0.729073	2.54104e-05	0.000122924	up
CREB3L2	ENSG00000182158	overlapping up	0.772179	4.70989e-05	0.00130451	up	0.776802	0.00279067	0.00856258	up
TMEM165	ENSG00000134851	overlapping up	0.368202	4.93083e-05	0.00134535	up	1.78234	2.09852e-30	1.51237e-28	up
LAMC2	ENSG00000058085	overlapping up	1.79645	5.20815e-05	0.0013982	up	1.3073	0.0110436	0.0289937	up
SEL1L	ENSG00000071537	overlapping up	0.500568	5.37387e-05	0.00143416	up	0.40146	6.15542e-20	2.00583e-18	up
GATA6	ENSG00000141448	overlapping up	1.62016	5.6346e-05	0.00149466	up	2.58685	7.98108e-05	0.000350298	up
HIVEP3	ENSG00000127124	overlapping up	1.08863	5.67388e-05	0.00150327	up	1.67332	6.84669e-07	4.43345e-06	up
WBP1L	ENSG00000166272	overlapping up	0.469212	6.13546e-05	0.00159111	up	0.518871	0.00144056	0.00472342	up
FBN1	ENSG00000166147	overlapping up	1.51183	6.25843e-05	0.00161149	up	0.557475	0.00237107	0.0073955	up
ACTN1	ENSG00000072110	overlapping up	1.12083	6.40602e-05	0.00163797	up	0.725461	9.40108e-05	0.000406206	up
DNAJB11	ENSG00000090520	overlapping up	0.34047	6.81015e-05	0.00172161	up	1.00253	7.3962e-77	3.80923e-74	up
AFAP1L1	ENSG00000157510	overlapping up	1.83829	6.81149e-05	0.00172161	up	1.34099	8.98e-07	5.70634e-06	up
NFE2L1	ENSG00000082641	overlapping up	0.561422	7.3765e-05	0.00183902	up	0.665623	4.43549e-23	1.85833e-21	up
TMX1	ENSG00000139921	overlapping up	0.35371	7.45629e-05	0.0018491	up	1.34289	1.13863e-14	2.19573e-13	up
TMEM263	ENSG00000151135	overlapping up	0.507848	8.18191e-05	0.00197916	up	0.219361	0.0137001	0.0349766	up
WDR44	ENSG00000131725	overlapping up	0.430589	8.34446e-05	0.00200034	up	0.395229	0.0103811	0.0274523	up
SEC16A	ENSG00000148396	overlapping up	0.265763	9.01146e-05	0.00211461	up	0.152423	0.00661116	0.0184122	up
MYH9	ENSG00000100345	overlapping up	0.804622	9.76199e-05	0.00223436	up	1.02233	1.47191e-07	1.08032e-06	up
SLC3A2	ENSG00000168003	overlapping up	0.463315	9.76589e-05	0.00223436	up	0.408283	3.66413e-06	2.09907e-05	up
MICAL2	ENSG00000133816	overlapping up	1.21693	0.000106099	0.00239257	up	1.36506	3.0521e-09	2.93614e-08	up
KLF10	ENSG00000155090	overlapping up	0.488143	0.000110359	0.00246614	up	0.582268	0.00615133	0.0172866	up
CD2AP	ENSG00000198087	overlapping up	0.607128	0.000110764	0.00247239	up	1.25233	8.26771e-09	7.42582e-08	up
SELENOM	ENSG00000198832	overlapping up	0.927977	0.0001181	0.00259723	up	1.49386	5.96766e-11	7.32635e-10	up
EMC6	ENSG00000127774	overlapping up	0.270729	0.00012409	0.0026951	up	0.540211	1.87596e-22	7.41811e-21	up
SLC52A2	ENSG00000185803	overlapping up	0.483593	0.000129832	0.00277937	up	0.793145	3.46452e-25	1.74599e-23	up
AC102945.2	ENSG00000279041	overlapping up	1.06452	0.000131003	0.00279354	up	1.31001	0.000209332	0.000839715	up
GTPBP2	ENSG00000172432	overlapping up	0.497763	0.000135273	0.00286237	up	1.39774	1.5256e-05	7.73085e-05	up
CHI3L1	ENSG00000133048	overlapping up	3.16644	0.000138689	0.00291499	up	5.00834	1.03111e-12	1.58579e-11	up
RNF121	ENSG00000137522	overlapping up	0.376122	0.000140912	0.00295042	up	0.900167	5.33425e-10	5.71831e-09	up
MGAT1	ENSG00000131446	overlapping up	0.411774	0.000146006	0.00303394	up	0.873854	4.75948e-17	1.15386e-15	up
ARF4	ENSG00000168374	overlapping up	0.468345	0.000163092	0.00331775	up	0.460001	1.05963e-09	1.09253e-08	up
KIAA2013	ENSG00000116685	overlapping up	0.42079	0.000167706	0.00337625	up	0.266709	3.44741e-05	0.000162926	up
TSPO	ENSG00000100300	overlapping up	1.03419	0.000172328	0.00344719	up	0.484763	0.000355015	0.00135072	up
TMEM106A	ENSG00000184988	overlapping up	1.0555	0.000177065	0.00351314	up	1.93145	3.02287e-07	2.10663e-06	up
MESD	ENSG00000117899	overlapping up	0.252553	0.000179601	0.00355383	up	0.459119	6.08021e-09	5.58945e-08	up
L3MBTL2-AS1	ENSG00000235513	overlapping up	1.32988	0.000193795	0.00380385	up	1.92809	3.18945e-09	3.05574e-08	up
PRICKLE3	ENSG00000012211	overlapping up	1.00141	0.000205355	0.00397044	up	1.7903	1.33468e-11	1.77924e-10	up
LIF	ENSG00000128342	overlapping up	1.3188	0.000206092	0.00397955	up	3.51096	2.20042e-16	5.01772e-15	up
DPH1	ENSG00000108963	overlapping up	0.433657	0.000216648	0.00413419	up	0.448717	3.93167e-05	0.00018396	up
REEP4	ENSG00000168476	overlapping up	0.515349	0.000218651	0.00416517	up	0.351966	0.0154057	0.0387086	up
IKBIP	ENSG00000166130	overlapping up	0.445128	0.000222545	0.0042174	up	0.362258	4.3251e-07	2.93945e-06	up
UTP14A	ENSG00000156697	overlapping up	0.462815	0.000223221	0.00422657	up	0.597212	7.77048e-07	4.99487e-06	up
CCDC71	ENSG00000177352	overlapping up	0.311319	0.000232667	0.00437152	up	0.166561	0.0118868	0.0308887	up
IL15RA	ENSG00000134470	overlapping up	1.65845	0.000250225	0.00464185	up	7.20974	3.83398e-28	2.33309e-26	up
TPRA1	ENSG00000163870	overlapping up	0.515672	0.000254755	0.00471394	up	0.907326	2.51958e-11	3.23621e-10	up
PARP3	ENSG00000041880	overlapping up	0.826233	0.000256678	0.00474551	up	0.989171	1.08855e-05	5.6741e-05	up
NRBF2	ENSG00000148572	overlapping up	0.583547	0.000257141	0.0047456	up	0.808389	9.55466e-06	5.02882e-05	up
SPCS3	ENSG00000129128	overlapping up	0.392287	0.000265678	0.00485874	up	0.4036	7.97679e-13	1.24125e-11	up
AC090825.1	ENSG00000259363	overlapping up	0.569615	0.000273167	0.00495035	up	0.970853	0.00229394	0.00717505	up
BMP4	ENSG00000125378	overlapping up	1.56411	0.000274283	0.00496239	up	2.18129	3.0552e-05	0.000145892	up
SLC7A5	ENSG00000103257	overlapping up	1.02941	0.000274919	0.00496583	up	1.49532	1.34596e-15	2.82798e-14	up
SNHG26	ENSG00000228649	overlapping up	1.78941	0.000275497	0.00497208	up	1.65627	0.000341205	0.00130334	up
B3GNT7	ENSG00000156966	overlapping up	0.950762	0.000276502	0.00498611	up	2.23725	0.000476204	0.0017595	up
KLF16	ENSG00000129911	overlapping up	0.480254	0.000287075	0.005143	up	0.605108	4.73328e-07	3.1861e-06	up
TBL2	ENSG00000106638	overlapping up	0.330728	0.00029278	0.00521965	up	0.459803	9.49136e-08	7.1835e-07	up
S100A11	ENSG00000163191	overlapping up	0.733739	0.000296212	0.00526801	up	1.16461	6.23846e-08	4.86632e-07	up
TRIP10	ENSG00000125733	overlapping up	0.731892	0.000301025	0.00532343	up	1.15721	8.48255e-15	1.6585e-13	up
S100A16	ENSG00000188643	overlapping up	0.813582	0.000301461	0.00532687	up	0.512461	2.52904e-06	1.49422e-05	up
GPR108	ENSG00000125734	overlapping up	0.516145	0.000317166	0.00549825	up	0.666616	7.01969e-09	6.38638e-08	up
AC021066.1	ENSG00000170442	overlapping up	1.54471	0.000317354	0.00549825	up	2.63474	0.00203834	0.00645981	up
ANKRD37	ENSG00000186352	overlapping up	0.83345	0.000317978	0.00550359	up	0.975513	0.00247407	0.00768609	up
ASS1	ENSG00000130707	overlapping up	1.67647	0.000320033	0.00552673	up	2.70235	9.801e-10	1.0145e-08	up
ALG2	ENSG00000119523	overlapping up	0.375066	0.000321375	0.00553622	up	1.00419	6.40907e-34	5.90978e-32	up
MTO1	ENSG00000135297	overlapping up	1.46333	0.00032444	0.00558464	up	0.449187	0.000652684	0.00232648	up
CSGALNACT2	ENSG00000169826	overlapping up	0.40331	0.000330394	0.00566936	up	0.439427	0.0042369	0.0124276	up
AC099066.2	ENSG00000227496	overlapping up	1.11021	0.000338109	0.00576124	up	1.23145	0.00051139	0.00187735	up
SEC61B	ENSG00000106803	overlapping up	0.320025	0.000353625	0.0059563	up	0.622833	1.15626e-10	1.37071e-09	up
ABCA1	ENSG00000165029	overlapping up	0.476155	0.000357925	0.0060103	up	0.947868	1.14619e-10	1.36125e-09	up
PKM	ENSG00000067225	overlapping up	0.550518	0.000363378	0.0060879	up	0.947171	3.48349e-13	5.6801e-12	up
TMEM185B	ENSG00000226479	overlapping up	0.3658	0.000369429	0.00614243	up	0.552907	1.12898e-06	7.06778e-06	up
COL4A2	ENSG00000134871	overlapping up	1.01064	0.000374297	0.00619664	up	0.43833	0.00755382	0.0207421	up
EFHD2	ENSG00000142634	overlapping up	0.626458	0.000374383	0.00619664	up	1.11917	1.30488e-11	1.74281e-10	up
COPG1	ENSG00000181789	overlapping up	0.414709	0.000387515	0.00634703	up	0.533934	7.36258e-07	4.74712e-06	up
ZBTB7A	ENSG00000178951	overlapping up	0.455595	0.000388351	0.00635599	up	0.60215	4.76324e-13	7.65454e-12	up
LMAN1	ENSG00000074695	overlapping up	0.626379	0.000388833	0.00635913	up	0.774294	1.2249e-32	1.0346e-30	up
CDR2	ENSG00000140743	overlapping up	0.588464	0.000410858	0.00664023	up	1.70853	8.24381e-06	4.39143e-05	up
IP6K3	ENSG00000161896	overlapping up	1.74598	0.000411977	0.00664964	up	4.44822	3.3088e-11	4.18375e-10	up
CTSO	ENSG00000256043	overlapping up	0.94717	0.000412045	0.00664964	up	0.518792	0.00660261	0.0183932	up
PPIA	ENSG00000196262	overlapping up	0.489261	0.000419827	0.00675043	up	0.31246	8.52549e-08	6.50847e-07	up
GBP3	ENSG00000117226	overlapping up	1.1454	0.000427629	0.00684081	up	3.87418	5.85711e-14	1.04547e-12	up
LOXL2	ENSG00000134013	overlapping up	1.14142	0.000440848	0.00697606	up	1.09731	0.00180138	0.00577206	up
RAI14	ENSG00000039560	overlapping up	0.605429	0.00044335	0.00700557	up	1.07301	1.23596e-07	9.22534e-07	up
TNKS1BP1	ENSG00000149115	overlapping up	0.39279	0.000447766	0.00705505	up	1.1809	1.40375e-23	6.13697e-22	up
SLX1A-SULT1A3	ENSG00000213599	overlapping up	0.919676	0.000449174	0.00706709	up	0.973398	4.55282e-05	0.000210605	up
AK2	ENSG00000004455	overlapping up	0.587234	0.000450131	0.00707708	up	0.669927	1.19434e-15	2.52198e-14	up
CEP164	ENSG00000110274	overlapping up	0.286132	0.000462793	0.00721418	up	0.426888	4.06104e-09	3.82997e-08	up
MGAT2	ENSG00000168282	overlapping up	0.447567	0.000463128	0.00721428	up	0.595347	1.90155e-07	1.36808e-06	up
G0S2	ENSG00000123689	overlapping up	1.89715	0.000467532	0.00727257	up	4.67777	7.5927e-44	1.31416e-41	up
AOPEP	ENSG00000148120	overlapping up	0.909607	0.000469938	0.00729103	up	1.04427	7.19279e-08	5.55737e-07	up
HLA-A	ENSG00000206503	overlapping up	0.85394	0.000494841	0.00755635	up	1.82108	4.22016e-26	2.26751e-24	up
ATP10A	ENSG00000206190	overlapping up	1.57327	0.000495064	0.00755635	up	2.14147	1.6129e-20	5.46676e-19	up
PFKL	ENSG00000141959	overlapping up	0.819665	0.000504776	0.00767655	up	1.23597	6.29549e-13	9.94283e-12	up
ERN1	ENSG00000178607	overlapping up	0.422704	0.000507439	0.00770774	up	1.0622	3.47274e-07	2.40034e-06	up
FAM174C	ENSG00000228300	overlapping up	0.534037	0.000509084	0.00772739	up	0.430975	9.49982e-09	8.44736e-08	up
EXT2	ENSG00000151348	overlapping up	0.561716	0.000513381	0.00776043	up	0.305764	1.22824e-07	9.17094e-07	up
ZDHHC12	ENSG00000160446	overlapping up	0.59205	0.000520617	0.00784886	up	0.262248	0.00475194	0.01377	up
GORASP2	ENSG00000115806	overlapping up	0.28672	0.000529214	0.00796141	up	0.183126	0.00010713	0.00045599	up
TNFAIP2	ENSG00000185215	overlapping up	1.63626	0.00054198	0.00810903	up	6.98679	3.05333e-92	2.30265e-89	up
MORF4L2	ENSG00000123562	overlapping up	0.435108	0.000551951	0.00822459	up	0.304134	9.30642e-06	4.90918e-05	up
SLC7A7	ENSG00000155465	overlapping up	1.0513	0.000561855	0.00833824	up	2.7661	0.00010544	0.000449427	up
TICAM1	ENSG00000127666	overlapping up	0.698397	0.000574034	0.0084674	up	1.41168	1.99827e-07	1.43327e-06	up
TRADD	ENSG00000102871	overlapping up	0.896208	0.00058018	0.00853521	up	1.17391	4.33938e-05	0.00020143	up
LINC01137	ENSG00000233621	overlapping up	1.00254	0.000591802	0.00863677	up	2.24876	6.5782e-12	9.16262e-11	up
COL4A1	ENSG00000187498	overlapping up	1.18978	0.000633325	0.00912154	up	0.502073	0.00886366	0.0238562	up
PFN1	ENSG00000108518	overlapping up	0.454065	0.000658269	0.00941454	up	0.81408	1.27822e-08	1.11303e-07	up
RNF181	ENSG00000168894	overlapping up	0.342853	0.000686508	0.00972176	up	0.731582	2.84608e-09	2.75308e-08	up
RBCK1	ENSG00000125826	overlapping up	0.349054	0.0007203	0.010113	up	1.29679	1.70743e-09	1.70873e-08	up
DUS1L	ENSG00000169718	overlapping up	0.335995	0.000772056	0.0106852	up	0.365581	1.95812e-06	1.17499e-05	up
RUNX2	ENSG00000124813	overlapping up	1.07508	0.000776059	0.010723	up	0.849183	6.97641e-06	3.77825e-05	up
DDX60L	ENSG00000181381	overlapping up	0.924388	0.000783155	0.010771	up	3.67636	7.48657e-17	1.77825e-15	up
OSMR	ENSG00000145623	overlapping up	0.413024	0.000787068	0.010818	up	1.01012	2.22821e-05	0.000109167	up
MED15	ENSG00000099917	overlapping up	0.293566	0.000790099	0.0108453	up	0.566917	0.000134871	0.000564061	up
NFE2L3	ENSG00000050344	overlapping up	1.40469	0.000792099	0.0108532	up	2.80553	7.53437e-09	6.80769e-08	up
WDR46	ENSG00000227057	overlapping up	0.299903	0.000818755	0.0111282	up	0.37039	8.47672e-05	0.000369442	up
SLAMF8	ENSG00000158714	overlapping up	3.29565	0.000845409	0.0113639	up	6.23271	5.41691e-10	5.80038e-09	up
ALPK2	ENSG00000198796	overlapping up	1.02496	0.000881132	0.0117764	up	1.71898	0.0174137	0.0431076	up
ALS2CL	ENSG00000178038	overlapping up	1.15019	0.000892067	0.0118892	up	3.09596	1.64384e-05	8.28827e-05	up
UBE2Z	ENSG00000159202	overlapping up	0.366924	0.00089557	0.0119286	up	1.25348	9.36909e-14	1.64045e-12	up
GBE1	ENSG00000114480	overlapping up	0.73586	0.000924076	0.0122489	up	1.05013	1.14712e-05	5.95587e-05	up
TRIM26	ENSG00000234127	overlapping up	0.295477	0.000968	0.0126873	up	0.695693	0.000420063	0.00157243	up
AC019117.2	ENSG00000236039	overlapping up	1.6446	0.000978956	0.0127835	up	2.40694	0.018124	0.0446097	up
AC008875.3	ENSG00000287263	overlapping up	1.29243	0.00099768	0.012974	up	0.945366	0.0031489	0.00954485	up
ZNF622	ENSG00000173545	overlapping up	0.324257	0.00102283	0.013215	up	0.337376	0.000446518	0.00166115	up
FMN1	ENSG00000248905	overlapping up	1.31495	0.00103851	0.0133313	up	2.4697	4.57005e-07	3.08606e-06	up
MAGT1	ENSG00000102158	overlapping up	0.315292	0.00106175	0.0135344	up	0.481728	3.00114e-08	2.47161e-07	up
TMED2	ENSG00000086598	overlapping up	0.256893	0.00109097	0.013803	up	0.420061	1.29831e-11	1.73514e-10	up
MMP25-AS1	ENSG00000261971	overlapping up	0.584845	0.00109259	0.0138077	up	1.0019	0.00809054	0.0220013	up
JTB	ENSG00000143543	overlapping up	0.349123	0.00111962	0.0140726	up	0.150242	0.00416275	0.0122271	up
PPP1R18	ENSG00000146112	overlapping up	0.457958	0.00111997	0.0140726	up	1.55571	2.05788e-07	1.47203e-06	up
SCO2	ENSG00000284194	overlapping up	0.484482	0.00112745	0.0141444	up	1.01533	1.31765e-18	3.73973e-17	up
MTHFD2	ENSG00000065911	overlapping up	0.749363	0.00116958	0.0145049	up	1.13539	1.184e-14	2.27699e-13	up
SLC39A13	ENSG00000165915	overlapping up	0.585569	0.00117295	0.0145306	up	0.26758	0.00363496	0.0108642	up
ZFP36L1	ENSG00000185650	overlapping up	0.373536	0.00125086	0.0152718	up	1.09398	1.34342e-09	1.36645e-08	up
RNF26	ENSG00000173456	overlapping up	0.333016	0.00129297	0.0156727	up	0.399899	0.0179176	0.0441787	up
ALG3	ENSG00000214160	overlapping up	0.302514	0.00131135	0.0158082	up	0.571556	4.75158e-16	1.05726e-14	up
AGRN	ENSG00000188157	overlapping up	0.507005	0.00133337	0.0160209	up	1.09674	1.10325e-28	7.05946e-27	up
NRP2	ENSG00000118257	overlapping up	1.06958	0.00139606	0.0166105	up	2.43364	5.1239e-41	7.46181e-39	up
STOML1	ENSG00000067221	overlapping up	0.555515	0.00140398	0.0166687	up	0.967721	1.27661e-08	1.11254e-07	up
CANT1	ENSG00000171302	overlapping up	0.474981	0.00144144	0.0170031	up	0.705952	2.67712e-07	1.87995e-06	up
STAP2	ENSG00000178078	overlapping up	0.95769	0.00147478	0.0173018	up	3.84387	2.83165e-13	4.66042e-12	up
MCTS1	ENSG00000232119	overlapping up	0.464941	0.00147543	0.0173018	up	0.252821	0.000482066	0.00177929	up
TVP23B	ENSG00000171928	overlapping up	0.373262	0.00148661	0.0173773	up	1.0547	1.57894e-23	6.84618e-22	up
RAB32	ENSG00000118508	overlapping up	0.862311	0.00148747	0.0173781	up	0.44899	5.2055e-05	0.000237972	up
PPP1R14B-AS1	ENSG00000256940	overlapping up	0.950252	0.00151281	0.0175899	up	0.353832	0.00569861	0.0161519	up
HPRT1	ENSG00000165704	overlapping up	0.717232	0.00152129	0.0176605	up	0.884451	6.08239e-05	0.00027444	up
LONP1	ENSG00000196365	overlapping up	0.46336	0.00155473	0.0179161	up	0.552649	9.86153e-13	1.52331e-11	up
EPSTI1	ENSG00000133106	overlapping up	1.53883	0.00155902	0.0179562	up	5.11773	2.33422e-18	6.46844e-17	up
WDR18	ENSG00000065268	overlapping up	0.384969	0.00157226	0.0180612	up	0.407453	1.00805e-09	1.04139e-08	up
NFKBIZ	ENSG00000144802	overlapping up	0.852227	0.00158434	0.0181352	up	5.15482	4.93338e-78	2.67111e-75	up
BCL3	ENSG00000069399	overlapping up	0.706299	0.00158448	0.0181352	up	1.36712	8.59496e-15	1.67737e-13	up
SLC7A1	ENSG00000139514	overlapping up	0.471269	0.00158617	0.0181356	up	0.576921	2.32014e-08	1.94645e-07	up
CALR	ENSG00000179218	overlapping up	0.300877	0.00158841	0.0181424	up	0.796272	4.52596e-24	2.07761e-22	up
ERLEC1	ENSG00000068912	overlapping up	0.321049	0.00159488	0.0182068	up	0.380491	1.27219e-08	1.10915e-07	up
MET	ENSG00000105976	overlapping up	1.3269	0.00160759	0.0183329	up	2.65294	3.28436e-07	2.27908e-06	up
ANKLE2	ENSG00000176915	overlapping up	0.377228	0.00162638	0.0184609	up	0.985798	3.21973e-12	4.64715e-11	up
RBPMS	ENSG00000157110	overlapping up	0.876669	0.00165289	0.0187142	up	0.664288	2.18809e-05	0.000107301	up
AC117489.1	ENSG00000278934	overlapping up	0.859066	0.0016536	0.0187142	up	1.21713	0.0114305	0.0298758	up
BCL10	ENSG00000142867	overlapping up	0.551761	0.00168477	0.0189863	up	0.386885	0.00721977	0.0199363	up
STT3A	ENSG00000134910	overlapping up	0.329826	0.0017148	0.0192359	up	0.368854	8.63811e-05	0.000375855	up
SPATS2L	ENSG00000196141	overlapping up	0.462487	0.00172643	0.0193565	up	0.421939	0.00260757	0.0080511	up
SERP1	ENSG00000120742	overlapping up	0.289064	0.00173004	0.019372	up	0.575832	6.51459e-16	1.42257e-14	up
GOLPH3	ENSG00000113384	overlapping up	0.25581	0.00173362	0.019372	up	0.323496	0.00233555	0.00729333	up
SLC50A1	ENSG00000169241	overlapping up	0.373918	0.00177821	0.0197855	up	0.445132	6.36847e-08	4.95675e-07	up
PIEZO1	ENSG00000103335	overlapping up	0.779008	0.00180155	0.0200147	up	1.41219	2.67805e-34	2.53586e-32	up
AHR	ENSG00000106546	overlapping up	1.10121	0.00182288	0.0201905	up	2.42825	5.72495e-30	4.00291e-28	up
GOPC	ENSG00000047932	overlapping up	0.500753	0.00185478	0.0204613	up	1.04309	1.8035e-11	2.36686e-10	up
ERLIN1	ENSG00000107566	overlapping up	0.340957	0.00191086	0.0208599	up	0.431445	1.34409e-06	8.30122e-06	up
STX5	ENSG00000162236	overlapping up	0.216638	0.00192232	0.0209538	up	0.503138	6.29585e-06	3.45217e-05	up
MICALL2	ENSG00000164877	overlapping up	0.539701	0.00199573	0.0215268	up	1.42076	2.80663e-14	5.17809e-13	up
MIR22HG	ENSG00000186594	overlapping up	0.887414	0.00200929	0.0216247	up	0.949149	1.00717e-05	5.27856e-05	up
NPLOC4	ENSG00000182446	overlapping up	0.495777	0.00202587	0.0217799	up	0.376241	8.06723e-09	7.2581e-08	up
GLA	ENSG00000102393	overlapping up	0.352358	0.00204824	0.0219455	up	0.725253	5.60364e-06	3.10242e-05	up
CDKN2B	ENSG00000147883	overlapping up	0.805238	0.00205259	0.021981	up	1.76189	1.86749e-21	6.9304e-20	up
AC016745.2	ENSG00000272563	overlapping up	1.06975	0.0020855	0.02229	up	2.35515	0.00159862	0.00518453	up
GFRA1	ENSG00000151892	overlapping up	1.07121	0.00209289	0.0223472	up	1.09775	0.000254697	0.00100152	up
GPANK1	ENSG00000204438	overlapping up	0.393746	0.00211834	0.0225641	up	0.293651	0.00343527	0.0103332	up
BAK1	ENSG00000030110	overlapping up	0.308113	0.00219389	0.0231778	up	0.839111	8.5996e-09	7.6912e-08	up
ETS1	ENSG00000134954	overlapping up	0.726911	0.00220676	0.0232353	up	1.85083	5.05093e-05	0.000231557	up
LOXL1	ENSG00000129038	overlapping up	0.968746	0.00220886	0.0232353	up	2.04433	9.13496e-08	6.94362e-07	up
CSRNP1	ENSG00000144655	overlapping up	0.635928	0.00222301	0.0233394	up	0.866042	2.09129e-05	0.000103008	up
TM9SF4	ENSG00000101337	overlapping up	0.452243	0.00229703	0.0238431	up	0.395945	0.00364002	0.0108763	up
PGK1	ENSG00000102144	overlapping up	0.51727	0.00229944	0.0238568	up	1.06215	4.69866e-07	3.16582e-06	up
LINC01426	ENSG00000234380	overlapping up	1.14742	0.00233484	0.024167	up	0.976307	0.00116107	0.00390584	up
LMF2	ENSG00000100258	overlapping up	0.419454	0.00242032	0.0247832	up	0.577629	3.46393e-10	3.83665e-09	up
TNFSF9	ENSG00000125657	overlapping up	1.36307	0.00250884	0.0254495	up	2.21509	0.00563609	0.0159919	up
UBE2E2	ENSG00000182247	overlapping up	0.616409	0.00250911	0.0254495	up	1.00775	1.36739e-09	1.38872e-08	up
STC2	ENSG00000113739	overlapping up	1.39771	0.00257834	0.0259926	up	2.53321	3.73236e-13	6.06427e-12	up
TMED7-TICAM2	ENSG00000251201	overlapping up	0.619801	0.00265094	0.0264429	up	1.21203	2.23542e-05	0.000109494	up
FKBP14	ENSG00000106080	overlapping up	0.581955	0.00271801	0.0268549	up	0.781331	3.93319e-08	3.17603e-07	up
PGAM1	ENSG00000171314	overlapping up	0.412036	0.00274913	0.0271014	up	1.33458	5.01671e-12	7.10006e-11	up
RAD23A	ENSG00000179262	overlapping up	0.172283	0.00279439	0.0274275	up	0.24157	0.00750621	0.0206228	up
FICD	ENSG00000198855	overlapping up	0.396815	0.00281372	0.0275649	up	1.19867	1.10344e-23	4.87455e-22	up
LTB4R2	ENSG00000213906	overlapping up	0.529778	0.00286519	0.0279197	up	0.474061	0.00806243	0.0219333	up
ATP6V0E1	ENSG00000113732	overlapping up	0.43891	0.00289454	0.0281558	up	0.324584	2.37841e-10	2.68858e-09	up
SPPL2A	ENSG00000138600	overlapping up	0.393654	0.00292199	0.0283725	up	1.36157	3.3218e-18	9.05072e-17	up
ZC3H12A	ENSG00000163874	overlapping up	0.766031	0.00303871	0.0291451	up	6.23793	8.33101e-201	2.93196e-197	up
PML	ENSG00000140464	overlapping up	0.342997	0.00306777	0.0293342	up	2.77552	6.71755e-19	1.9756e-17	up
UNC5B	ENSG00000107731	overlapping up	0.652482	0.00307174	0.0293465	up	1.44627	0.000270618	0.00105824	up
ACSL1	ENSG00000151726	overlapping up	1.04429	0.00310348	0.029547	up	1.87987	9.43533e-08	7.14621e-07	up
SMAD7	ENSG00000101665	overlapping up	0.60651	0.00315738	0.0299046	up	1.84453	8.45312e-06	4.49273e-05	up
BFAR	ENSG00000103429	overlapping up	0.237098	0.00320658	0.0302531	up	0.212677	0.00983718	0.026197	up
TOR1B	ENSG00000136816	overlapping up	0.317352	0.0032088	0.0302611	up	0.423444	9.4257e-09	8.39094e-08	up
WT1	ENSG00000184937	overlapping up	1.56969	0.00328533	0.0308636	up	3.85206	0.000152329	0.00062922	up
PIGV	ENSG00000060642	overlapping up	0.501377	0.00331326	0.0309933	up	1.32483	2.10297e-10	2.40034e-09	up
STARD13	ENSG00000133121	overlapping up	0.674548	0.00333577	0.0311376	up	0.547853	0.0153656	0.0386215	up
UBD	ENSG00000213886	overlapping up	2.91627	0.00334292	0.0311911	up	6.45781	1.38589e-46	2.68482e-44	up
MCC	ENSG00000171444	overlapping up	0.428792	0.00334746	0.0312202	up	0.769865	0.0118398	0.0307855	up
KCTD11	ENSG00000213859	overlapping up	0.369712	0.00337565	0.031443	up	0.538773	0.000954147	0.00327287	up
NR1H2	ENSG00000131408	overlapping up	0.416357	0.00338464	0.0314734	up	0.782223	4.08658e-11	5.1121e-10	up
SLC35E1	ENSG00000127526	overlapping up	0.396093	0.00342158	0.0316961	up	0.792564	9.32381e-06	4.91712e-05	up
CXCL16	ENSG00000161921	overlapping up	0.960283	0.00345621	0.0318945	up	2.53105	5.82575e-30	4.05486e-28	up
ALCAM	ENSG00000170017	overlapping up	0.780612	0.00345939	0.0318985	up	1.3163	7.34278e-05	0.000324917	up
SURF4	ENSG00000148248	overlapping up	0.378157	0.00350272	0.0322169	up	0.752841	2.59086e-41	3.85272e-39	up
TRIM22	ENSG00000132274	overlapping up	0.605012	0.00350551	0.032229	up	1.74208	2.35152e-07	1.66377e-06	up
NECTIN2	ENSG00000130202	overlapping up	0.388932	0.00353446	0.0324238	up	1.21644	3.59598e-09	3.41578e-08	up
TNS1	ENSG00000079308	overlapping up	0.674477	0.00353543	0.0324238	up	1.66973	8.18304e-11	9.89652e-10	up
RPS6KC1	ENSG00000136643	overlapping up	0.212911	0.00355454	0.0324894	up	0.56613	9.80724e-10	1.01465e-08	up
MED8	ENSG00000159479	overlapping up	0.30773	0.00371509	0.0335657	up	0.367871	4.85893e-05	0.000223727	up
BET1	ENSG00000105829	overlapping up	0.345039	0.00376226	0.0339043	up	1.04314	8.95696e-16	1.91046e-14	up
KLHL21	ENSG00000162413	overlapping up	0.471804	0.00376265	0.0339043	up	0.228031	0.00350568	0.0105185	up
AC016831.6	ENSG00000285106	overlapping up	0.738489	0.00376337	0.0339043	up	2.15489	0.0179794	0.0442952	up
OSBP	ENSG00000110048	overlapping up	0.168382	0.0038513	0.0345607	up	0.256665	0.0157914	0.0395788	up
ARPC1B	ENSG00000130429	overlapping up	0.83386	0.00390966	0.0348068	up	0.894272	3.14408e-09	3.01637e-08	up
FOSL2	ENSG00000075426	overlapping up	0.801806	0.00399831	0.0353966	up	1.04049	1.45363e-21	5.42313e-20	up
CSPG4	ENSG00000173546	overlapping up	1.01684	0.0040252	0.0355773	up	0.974072	0.00800331	0.021809	up
DEGS1	ENSG00000143753	overlapping up	0.391411	0.00402915	0.0355978	up	0.173314	0.00313867	0.00951969	up
NINJ1	ENSG00000131669	overlapping up	0.571966	0.00410181	0.0361235	up	2.40106	5.2203e-16	1.15064e-14	up
BBC3	ENSG00000105327	overlapping up	0.352641	0.0041276	0.0362345	up	1.03103	0.000594944	0.002142	up
GOLGA2	ENSG00000167110	overlapping up	0.40632	0.00412964	0.0362379	up	0.484301	1.87915e-05	9.36294e-05	up
SLC39A14	ENSG00000104635	overlapping up	0.606946	0.00421445	0.036835	up	4.85927	1.10396e-195	2.91391e-192	up
DERL1	ENSG00000136986	overlapping up	0.215522	0.00423802	0.0369968	up	0.636294	5.0844e-13	8.13966e-12	up
TPI1	ENSG00000111669	overlapping up	0.234421	0.00429408	0.037374	up	0.650077	0.000573772	0.00207472	up
SQSTM1	ENSG00000161011	overlapping up	0.568449	0.00430767	0.0374411	up	1.19256	4.09421e-36	4.3885e-34	up
ISOC2	ENSG00000063241	overlapping up	0.414577	0.00437493	0.0378758	up	0.850766	0.000134587	0.000563207	up
PNPLA2	ENSG00000177666	overlapping up	0.398872	0.00442308	0.0382324	up	0.466572	7.8628e-08	6.04408e-07	up
ANXA7	ENSG00000138279	overlapping up	0.363433	0.00448587	0.0385627	up	0.62923	1.35286e-07	1.002e-06	up
SLC9A1	ENSG00000090020	overlapping up	0.349805	0.00449096	0.0385762	up	0.524216	0.000186428	0.000754717	up
SYTL4	ENSG00000102362	overlapping up	0.740835	0.00450002	0.0386238	up	2.26558	3.63208e-19	1.09296e-17	up
MRPL17	ENSG00000158042	overlapping up	0.314189	0.00452404	0.0387694	up	0.856892	1.95399e-08	1.65505e-07	up
STEAP2	ENSG00000157214	overlapping up	0.948337	0.00465106	0.0395494	up	1.4053	0.0127986	0.0329499	up
CEBPB	ENSG00000172216	overlapping up	0.525288	0.00466978	0.0396434	up	2.926	1.01317e-31	7.92376e-30	up
SLC38A10	ENSG00000157637	overlapping up	0.350982	0.00472161	0.0399379	up	0.232267	0.00689889	0.0191378	up
AC067852.2	ENSG00000266962	overlapping up	0.229942	0.00473658	0.0400361	up	0.4122	2.58649e-10	2.91287e-09	up
LPGAT1	ENSG00000123684	overlapping up	0.406799	0.0047415	0.0400547	up	0.612973	0.000109722	0.000466175	up
B4GALT7	ENSG00000027847	overlapping up	0.536551	0.00474695	0.0400854	up	0.338912	0.00198506	0.00630133	up
UAP1	ENSG00000117143	overlapping up	0.523379	0.00484866	0.0406799	up	0.683354	1.23258e-05	6.35294e-05	up
SMTN	ENSG00000183963	overlapping up	0.747243	0.0048746	0.0408648	up	0.879114	5.41134e-07	3.58762e-06	up
RAB42	ENSG00000188060	overlapping up	1.07732	0.00493259	0.041225	up	1.20966	0.00584047	0.0164986	up
ITPRIPL2	ENSG00000205730	overlapping up	0.437069	0.00495859	0.0413479	up	0.656929	0.000389782	0.00147054	up
PSMF1	ENSG00000125818	overlapping up	0.345923	0.0049659	0.0413775	up	0.75276	9.85468e-08	7.44247e-07	up
GPRC5A	ENSG00000013588	overlapping up	1.17142	0.00501735	0.0417112	up	1.5899	0.00146132	0.00478258	up
DR1	ENSG00000117505	overlapping up	0.206065	0.00507277	0.0420605	up	0.178322	0.0189859	0.046471	up
MRPL18	ENSG00000112110	overlapping up	0.219898	0.0050797	0.042071	up	0.378001	3.63297e-14	6.62468e-13	up
PILRA	ENSG00000085514	overlapping up	0.736324	0.00515194	0.0424311	up	2.29146	0.00863959	0.0233321	up
VAV2	ENSG00000160293	overlapping up	0.297476	0.00517127	0.0424923	up	0.892837	5.44235e-35	5.3204e-33	up
EOGT	ENSG00000163378	overlapping up	0.600602	0.00517979	0.0425428	up	1.17297	0.000501751	0.00184453	up
GCNT3	ENSG00000140297	overlapping up	2.02321	0.00523757	0.0428128	up	4.73087	4.57727e-09	4.2881e-08	up
FAM83G	ENSG00000188522	overlapping up	0.651614	0.00530621	0.0431491	up	1.23397	6.4557e-13	1.01767e-11	up
HM13	ENSG00000101294	overlapping up	0.33933	0.00543188	0.0439432	up	0.986436	3.06275e-08	2.51744e-07	up
UCHL3	ENSG00000118939	overlapping up	0.400568	0.00557785	0.0447614	up	0.329661	0.00195881	0.0062255	up
PTGIR	ENSG00000160013	overlapping up	1.49116	0.00561552	0.0449792	up	4.89411	4.88426e-16	1.08223e-14	up
DNAJC3	ENSG00000102580	overlapping up	0.423325	0.00563736	0.0450557	up	0.754811	2.74679e-16	6.1967e-15	up
PAPPA	ENSG00000182752	overlapping up	1.40206	0.00564037	0.0450557	up	3.26264	8.78571e-41	1.25351e-38	up
ALKBH6	ENSG00000239382	overlapping up	0.346036	0.00570823	0.0454385	up	0.346539	0.0142892	0.0362878	up
FKBP1A	ENSG00000088832	overlapping up	0.39427	0.00572487	0.045509	up	0.390144	0.00345775	0.0103905	up
PTTG1IP	ENSG00000183255	overlapping up	0.348822	0.00579627	0.0458772	up	0.265644	0.000855109	0.00296786	up
VPS25	ENSG00000131475	overlapping up	0.229602	0.00586592	0.0462618	up	0.261994	0.000242725	0.000959462	up
SCARB2	ENSG00000138760	overlapping up	0.30704	0.00587748	0.0462776	up	0.87368	1.48671e-09	1.50352e-08	up
ARHGAP27P1-BPTFP1-KPNA2P3	ENSG00000215769	overlapping up	0.487911	0.00590602	0.0464612	up	1.20852	0.00913952	0.0245067	up
AL161421.1	ENSG00000275202	overlapping up	0.66831	0.00592482	0.0465758	up	1.08529	7.22028e-06	3.90231e-05	up
DERL2	ENSG00000072849	overlapping up	0.312021	0.00603425	0.0471492	up	0.40098	5.37493e-19	1.59182e-17	up
JUNB	ENSG00000171223	overlapping up	0.515313	0.00609256	0.0475034	up	2.26329	1.92457e-16	4.41251e-15	up
LRP10	ENSG00000197324	overlapping up	0.59263	0.00619449	0.0480932	up	0.380809	0.00472316	0.0136998	up
AC241952.2	ENSG00000275131	overlapping up	0.481181	0.00623884	0.048318	up	0.940937	0.0004425	0.00164753	up
BLOC1S3	ENSG00000189114	overlapping up	0.335279	0.0062558	0.0483735	up	0.81319	0.00165407	0.00534876	up
PSD4	ENSG00000125637	overlapping up	1.01043	0.00634035	0.0488787	up	2.17928	4.25119e-07	2.89481e-06	up
RPN1	ENSG00000163902	overlapping up	0.263499	0.00644595	0.0494512	up	0.682887	4.67004e-30	3.27617e-28	up
SDF4	ENSG00000078808	overlapping up	0.443359	0.00651361	0.0498311	up	0.737713	1.61045e-20	5.46676e-19	up
DIO3	ENSG00000197406	overlapping down	-5.59379	3.37556e-21	2.47136e-17	down	-3.69934	1.91803e-05	9.52741e-05	down
LRRC3B	ENSG00000179796	overlapping down	-3.96731	3.29579e-18	1.20648e-14	down	-3.76011	1.62235e-08	1.39089e-07	down
TSPAN7	ENSG00000156298	overlapping down	-3.07646	9.95535e-17	2.42955e-13	down	-1.42609	4.41331e-05	0.000204636	down
SLCO1C1	ENSG00000139155	overlapping down	-3.85629	2.62599e-14	3.03565e-11	down	-3.35795	1.12363e-10	1.33596e-09	down
RYR2	ENSG00000198626	overlapping down	-3.73465	3.92636e-13	3.31687e-10	down	-3.90847	0.000124822	0.000525258	down
BAIAP2	ENSG00000175866	overlapping down	-0.732621	3.50443e-12	2.19918e-09	down	-0.670401	3.03027e-09	2.91646e-08	down
CDH18	ENSG00000145526	overlapping down	-2.51901	1.37254e-11	7.01081e-09	down	-2.81415	0.000518865	0.0019005	down
BTBD17	ENSG00000204347	overlapping down	-3.57067	2.11489e-11	9.94646e-09	down	-2.39754	8.77025e-06	4.64841e-05	down
GNAO1	ENSG00000087258	overlapping down	-2.79391	2.60212e-11	1.16639e-08	down	-1.43126	3.38941e-07	2.34602e-06	down
GAP43	ENSG00000172020	overlapping down	-1.82404	3.2847e-11	1.41461e-08	down	-1.01073	0.00233532	0.00729333	down
SCN3A	ENSG00000153253	overlapping down	-2.63475	3.62063e-11	1.5293e-08	down	-1.76176	1.50793e-06	9.23211e-06	down
EFNB3	ENSG00000108947	overlapping down	-1.74182	8.71384e-11	2.89986e-08	down	-2.31541	2.37256e-14	4.41011e-13	down
P2RY1	ENSG00000169860	overlapping down	-1.43129	1.91377e-10	5.48636e-08	down	-1.82312	6.63788e-07	4.31013e-06	down
NUDT11	ENSG00000196368	overlapping down	-0.796434	1.33427e-09	2.79105e-07	down	-1.24039	7.04519e-11	8.57937e-10	down
VAT1L	ENSG00000171724	overlapping down	-2.59169	1.43106e-09	2.90263e-07	down	-0.855345	0.000952748	0.00326933	down
ANKRD6	ENSG00000135299	overlapping down	-0.949196	1.91893e-09	3.68306e-07	down	-1.93863	1.04932e-14	2.03092e-13	down
AKAP6	ENSG00000151320	overlapping down	-1.57323	1.94516e-09	3.68306e-07	down	-0.957601	6.01035e-13	9.5067e-12	down
NRXN1	ENSG00000179915	overlapping down	-3.28819	2.38954e-09	4.44779e-07	down	-1.52584	0.00525634	0.0150438	down
SPINK5	ENSG00000133710	overlapping down	-2.35655	3.68394e-09	6.3214e-07	down	-1.47911	6.74944e-08	5.23398e-07	down
PDE3A	ENSG00000172572	overlapping down	-1.69398	4.63128e-09	7.60348e-07	down	-2.13277	1.64599e-05	8.29318e-05	down
CNTNAP3B	ENSG00000154529	overlapping down	-2.82504	7.14766e-09	1.09784e-06	down	-1.92726	3.82319e-44	6.72753e-42	down
DPF1	ENSG00000011332	overlapping down	-1.65481	7.96474e-09	1.20997e-06	down	-0.656186	0.0158391	0.0396701	down
KCNC1	ENSG00000129159	overlapping down	-2.12082	1.00642e-08	1.45148e-06	down	-2.51699	1.09605e-09	1.12789e-08	down
SGSM1	ENSG00000167037	overlapping down	-2.87212	1.10755e-08	1.53964e-06	down	-1.13181	0.0107625	0.028358	down
EMX2OS	ENSG00000229847	overlapping down	-4.47261	1.29085e-08	1.72879e-06	down	-1.26505	0.00816865	0.0221908	down
PITPNC1	ENSG00000154217	overlapping down	-1.36824	1.741e-08	2.26269e-06	down	-0.912772	0.00410047	0.0120677	down
DAAM1	ENSG00000100592	overlapping down	-1.30196	2.92718e-08	3.65298e-06	down	-0.845931	1.91647e-06	1.15261e-05	down
S1PR1	ENSG00000170989	overlapping down	-1.89759	3.11117e-08	3.83897e-06	down	-2.05337	4.51598e-11	5.61929e-10	down
SPON1	ENSG00000262655	overlapping down	-2.52767	5.12916e-08	5.74779e-06	down	-1.43837	0.000132401	0.000555048	down
IGLON5	ENSG00000142549	overlapping down	-3.08373	8.09897e-08	8.39535e-06	down	-1.81495	1.85691e-05	9.26087e-05	down
C11orf87	ENSG00000185742	overlapping down	-1.35576	1.09311e-07	1.04843e-05	down	-5.3929	4.2362e-20	1.40206e-18	down
PAG1	ENSG00000076641	overlapping down	-2.15854	1.27603e-07	1.17759e-05	down	-0.786067	0.00719632	0.0198845	down
STMN2	ENSG00000104435	overlapping down	-3.52123	1.38865e-07	1.26035e-05	down	-2.32143	5.28163e-22	2.03516e-20	down
PDE8B	ENSG00000113231	overlapping down	-2.17211	1.5377e-07	1.36342e-05	down	-1.63775	0.000831983	0.00289474	down
SPP1	ENSG00000118785	overlapping down	-2.25058	1.64817e-07	1.43653e-05	down	-1.77627	0.00443207	0.0129444	down
CTXND1	ENSG00000259417	overlapping down	-2.30337	1.77835e-07	1.51983e-05	down	-1.81889	1.08114e-12	1.6555e-11	down
HS3ST1	ENSG00000002587	overlapping down	-3.61437	1.83309e-07	1.53702e-05	down	-3.04134	2.16307e-05	0.000106197	down
B3GAT2	ENSG00000112309	overlapping down	-2.29398	2.28571e-07	1.83895e-05	down	-1.56735	3.17164e-05	0.000150941	down
AC130650.2	ENSG00000276564	overlapping down	-1.52806	2.63603e-07	2.09775e-05	down	-2.20525	0.00110172	0.00372223	down
FAM181A	ENSG00000140067	overlapping down	-1.98551	2.84422e-07	2.23908e-05	down	-2.75528	3.47793e-16	7.79617e-15	down
NLRP1	ENSG00000091592	overlapping down	-1.68909	2.96881e-07	2.3123e-05	down	-2.07262	3.57879e-88	2.28999e-85	down
NUDT3	ENSG00000272325	overlapping down	-0.568443	3.0338e-07	2.34326e-05	down	-0.830926	1.24012e-08	1.08253e-07	down
AL391807.1	ENSG00000230910	overlapping down	-1.98379	3.09936e-07	2.3637e-05	down	-3.55243	6.59625e-10	6.98178e-09	down
GNAL	ENSG00000141404	overlapping down	-2.55214	3.18953e-07	2.42404e-05	down	-0.986946	0.00015338	0.000633068	down
SCRN1	ENSG00000136193	overlapping down	-0.371887	3.22002e-07	2.43877e-05	down	-0.285717	0.000166914	0.000683451	down
CNRIP1	ENSG00000119865	overlapping down	-0.789195	3.47474e-07	2.57835e-05	down	-0.426366	0.004512	0.0131523	down
ATP1B2	ENSG00000129244	overlapping down	-1.28364	3.53363e-07	2.61322e-05	down	-3.13356	7.04457e-24	3.15824e-22	down
GABBR2	ENSG00000136928	overlapping down	-2.48425	4.23567e-07	3.03037e-05	down	-1.37432	1.49589e-07	1.09716e-06	down
CDH20	ENSG00000101542	overlapping down	-2.47322	4.68562e-07	3.30372e-05	down	-2.79809	3.28938e-07	2.28107e-06	down
WDR19	ENSG00000157796	overlapping down	-0.551067	5.8979e-07	3.99686e-05	down	-0.610349	1.38514e-05	7.05634e-05	down
TTYH2	ENSG00000141540	overlapping down	-1.17563	5.92928e-07	3.99686e-05	down	-1.3085	1.81408e-12	2.70523e-11	down
SLC4A8	ENSG00000050438	overlapping down	-1.02143	6.01682e-07	4.04139e-05	down	-1.33877	4.20892e-07	2.86973e-06	down
TOX2	ENSG00000124191	overlapping down	-1.9596	6.16491e-07	4.0954e-05	down	-2.21029	9.51698e-13	1.4744e-11	down
FAIM2	ENSG00000135472	overlapping down	-1.70168	6.84076e-07	4.45667e-05	down	-1.94537	0.00169717	0.00547387	down
CDS1	ENSG00000163624	overlapping down	-1.50329	6.85829e-07	4.45667e-05	down	-2.6049	1.98627e-05	9.83173e-05	down
C9orf72	ENSG00000147894	overlapping down	-0.879397	8.33827e-07	5.29311e-05	down	-0.623033	0.00844922	0.0228794	down
KIF26A	ENSG00000066735	overlapping down	-2.03339	9.64298e-07	5.983e-05	down	-2.01848	0.00306157	0.00931125	down
KLHDC8A	ENSG00000162873	overlapping down	-1.70489	1.05561e-06	6.45835e-05	down	-3.33667	1.02184e-13	1.7803e-12	down
AC104964.4	ENSG00000272505	overlapping down	-1.41719	1.25999e-06	7.47955e-05	down	-1.58595	0.0197426	0.0480946	down
FRRS1L	ENSG00000260230	overlapping down	-1.65179	1.45259e-06	8.46277e-05	down	-2.27847	8.78455e-36	9.25226e-34	down
TTYH1	ENSG00000167614	overlapping down	-1.73355	1.62509e-06	9.22309e-05	down	-1.30922	0.000151252	0.000625486	down
TENT5C	ENSG00000183508	overlapping down	-1.85384	1.71265e-06	9.52318e-05	down	-0.916996	0.0183326	0.0450547	down
ANKS1A	ENSG00000064999	overlapping down	-0.544161	1.78935e-06	9.87472e-05	down	-0.359943	0.000363519	0.00137984	down
SELENOP	ENSG00000250722	overlapping down	-2.09494	1.79659e-06	9.88982e-05	down	-2.30483	2.08611e-28	1.30713e-26	down
RAP2A	ENSG00000125249	overlapping down	-0.648233	1.81068e-06	9.94245e-05	down	-0.586614	2.51723e-05	0.000121884	down
PEG10	ENSG00000242265	overlapping down	-1.63508	1.84461e-06	0.000100784	down	-0.913369	0.000372298	0.00141012	down
PLPPR5	ENSG00000117598	overlapping down	-1.99605	2.31343e-06	0.000121248	down	-4.11513	4.93909e-09	4.60459e-08	down
DNAH9	ENSG00000007174	overlapping down	-2.13112	2.3675e-06	0.000123222	down	-1.79554	0.00054397	0.00198111	down
FGD4	ENSG00000139132	overlapping down	-1.33639	2.46276e-06	0.000126977	down	-1.38921	1.29447e-05	6.64094e-05	down
FAM171B	ENSG00000144369	overlapping down	-0.728041	2.53977e-06	0.000130031	down	-2.4392	3.08841e-31	2.34586e-29	down
AGAP1	ENSG00000157985	overlapping down	-0.888169	2.64918e-06	0.00013438	down	-0.91111	3.84381e-07	2.63783e-06	down
ST8SIA3	ENSG00000177511	overlapping down	-3.29037	2.6808e-06	0.000135671	down	-1.94151	0.013702	0.0349771	down
PANK1	ENSG00000152782	overlapping down	-0.81954	2.69613e-06	0.000136133	down	-0.751884	2.70075e-05	0.000130174	down
CRABP1	ENSG00000166426	overlapping down	-2.96198	2.79865e-06	0.000140663	down	-1.16718	7.42418e-09	6.71675e-08	down
MAB21L1	ENSG00000180660	overlapping down	-2.2597	2.84362e-06	0.00014191	down	-2.97463	0.000119829	0.000505859	down
PRXL2A	ENSG00000122378	overlapping down	-0.761315	2.86729e-06	0.000142482	down	-0.893451	1.21944e-20	4.21437e-19	down
BLACAT1	ENSG00000281406	overlapping down	-2.67751	3.01685e-06	0.000147577	down	-1.8187	0.00096144	0.00329467	down
AC016582.3	ENSG00000267640	overlapping down	-1.76608	3.04237e-06	0.000148165	down	-2.21042	0.0022309	0.00699551	down
ELOVL4	ENSG00000118402	overlapping down	-0.553298	3.26278e-06	0.000157157	down	-0.46216	0.00116125	0.00390584	down
KBTBD6	ENSG00000165572	overlapping down	-0.448536	4.04407e-06	0.000190609	down	-0.605947	2.94023e-05	0.000140976	down
PLCXD3	ENSG00000182836	overlapping down	-2.15003	4.26761e-06	0.000198589	down	-5.0321	3.20971e-19	9.72401e-18	down
PRKAR2B	ENSG00000005249	overlapping down	-1.21326	4.29535e-06	0.000199457	down	-0.720969	1.594e-06	9.71955e-06	down
PPM1L	ENSG00000163590	overlapping down	-1.18801	4.33085e-06	0.000199838	down	-1.81421	1.45962e-15	3.05161e-14	down
PEG13	ENSG00000282164	overlapping down	-1.93698	5.00385e-06	0.000224926	down	-3.82321	5.41729e-12	7.64138e-11	down
EPHB1	ENSG00000154928	overlapping down	-1.43117	5.68161e-06	0.000251088	down	-2.02717	1.44289e-07	1.06272e-06	down
CTNND2	ENSG00000169862	overlapping down	-1.17802	5.76343e-06	0.000253683	down	-1.8501	1.65443e-11	2.18071e-10	down
RGS17	ENSG00000091844	overlapping down	-0.946767	6.00243e-06	0.000261064	down	-0.368427	0.0128691	0.0331073	down
JPH4	ENSG00000092051	overlapping down	-1.68473	6.09627e-06	0.000264099	down	-1.52326	1.22895e-06	7.64375e-06	down
BSN	ENSG00000164061	overlapping down	-1.15425	6.40056e-06	0.000274039	down	-0.962762	0.00851874	0.023044	down
EFR3B	ENSG00000084710	overlapping down	-0.693718	6.58459e-06	0.000280476	down	-1.85968	2.59687e-24	1.21857e-22	down
ATP6V1G2	ENSG00000213760	overlapping down	-0.696423	7.06075e-06	0.000296121	down	-1.12433	6.05181e-07	3.97357e-06	down
RNFT2	ENSG00000135119	overlapping down	-1.14456	7.3627e-06	0.000305698	down	-1.69571	1.41512e-05	7.19866e-05	down
DGCR9	ENSG00000273032	overlapping down	-1.46162	7.9744e-06	0.000325557	down	-3.57884	0.0104007	0.0274938	down
SH2D3C	ENSG00000095370	overlapping down	-2.18067	7.99497e-06	0.000325791	down	-1.54189	0.00353179	0.0105903	down
TESC	ENSG00000088992	overlapping down	-2.36476	8.30693e-06	0.000335392	down	-3.05294	2.64607e-08	2.19805e-07	down
ACAT2	ENSG00000120437	overlapping down	-1.22077	8.34589e-06	0.000336347	down	-0.647486	0.000218989	0.000875458	down
WSCD1	ENSG00000179314	overlapping down	-1.50417	8.82074e-06	0.000351677	down	-2.34568	1.0234e-07	7.71787e-07	down
ACSL6	ENSG00000164398	overlapping down	-1.90778	8.89232e-06	0.000353824	down	-1.24401	0.0001602	0.000658768	down
PATJ	ENSG00000132849	overlapping down	-1.35717	9.50454e-06	0.000373448	down	-0.917022	0.00624385	0.017514	down
ZBTB8B	ENSG00000273274	overlapping down	-1.01846	9.54886e-06	0.00037452	down	-1.55008	0.00654276	0.0182506	down
MAPK4	ENSG00000141639	overlapping down	-1.44885	9.79382e-06	0.000381403	down	-2.5467	0.00997338	0.026497	down
CDO1	ENSG00000129596	overlapping down	-1.31488	1.05405e-05	0.000408311	down	-0.768771	1.82782e-19	5.71798e-18	down
VWA5A	ENSG00000110002	overlapping down	-1.06604	1.19635e-05	0.000453044	down	-1.2132	2.28188e-11	2.94884e-10	down
FGFBP3	ENSG00000174721	overlapping down	-1.68677	1.22166e-05	0.000461041	down	-1.43887	9.9275e-06	5.21076e-05	down
KIAA1549L	ENSG00000110427	overlapping down	-1.19224	1.25976e-05	0.000472172	down	-1.14113	2.97391e-10	3.33141e-09	down
NLGN4X	ENSG00000146938	overlapping down	-1.2139	1.28098e-05	0.000478494	down	-1.68779	1.26519e-23	5.56577e-22	down
LIN7A	ENSG00000111052	overlapping down	-1.03104	1.28381e-05	0.000478737	down	-1.66562	3.44584e-07	2.38253e-06	down
B3GAT1	ENSG00000109956	overlapping down	-1.67634	1.2931e-05	0.000479758	down	-3.21785	4.20226e-16	9.38993e-15	down
ABLIM2	ENSG00000163995	overlapping down	-1.57404	1.37386e-05	0.000500423	down	-1.62576	0.000808455	0.00282058	down
PLEKHA6	ENSG00000143850	overlapping down	-1.39412	1.39589e-05	0.000506764	down	-2.13247	1.7752e-06	1.07345e-05	down
MSI1	ENSG00000135097	overlapping down	-0.961432	1.46423e-05	0.000523211	down	-1.80482	1.23194e-37	1.42932e-35	down
CLVS2	ENSG00000146352	overlapping down	-3.00991	1.56816e-05	0.000556431	down	-2.31126	0.0185164	0.0454642	down
RASD1	ENSG00000108551	overlapping down	-1.58123	1.63916e-05	0.00057604	down	-0.924462	0.00509713	0.0146417	down
EMX2	ENSG00000170370	overlapping down	-3.70478	1.72172e-05	0.000597407	down	-0.865961	0.00089938	0.00310874	down
ID2-AS1	ENSG00000235092	overlapping down	-1.31071	1.90895e-05	0.00064704	down	-1.03742	0.00344069	0.0103466	down
GNG3	ENSG00000162188	overlapping down	-1.44272	1.94437e-05	0.000658031	down	-1.85944	1.43381e-08	1.23982e-07	down
ZNF69	ENSG00000198429	overlapping down	-0.510563	1.98056e-05	0.000667415	down	-1.78101	1.32744e-08	1.1538e-07	down
NYNRIN	ENSG00000205978	overlapping down	-0.693022	2.07115e-05	0.000694514	down	-1.19281	1.51296e-14	2.87817e-13	down
ERP27	ENSG00000139055	overlapping down	-2.37783	2.11201e-05	0.000707137	down	-3.62186	0.00520582	0.0149194	down
NACAD	ENSG00000136274	overlapping down	-0.906608	2.13545e-05	0.000712811	down	-0.898475	1.50669e-14	2.86883e-13	down
TINCR	ENSG00000223573	overlapping down	-1.6418	2.15998e-05	0.000717693	down	-2.35818	0.00632231	0.0177082	down
HS6ST1	ENSG00000136720	overlapping down	-1.12477	2.16464e-05	0.000717693	down	-0.382632	0.0154822	0.0388731	down
AC002316.1	ENSG00000132359	overlapping down	-1.98598	2.18478e-05	0.000722689	down	-1.16383	0.00561544	0.015944	down
NEBL	ENSG00000078114	overlapping down	-1.72723	2.32007e-05	0.000758302	down	-2.5954	1.69438e-09	1.69647e-08	down
GSTA4	ENSG00000170899	overlapping down	-0.413866	2.35413e-05	0.000767154	down	-1.43628	8.3206e-17	1.96971e-15	down
IPO5P1	ENSG00000269837	overlapping down	-1.10808	2.38288e-05	0.000775372	down	-0.943868	0.000115959	0.000490897	down
ABCC9	ENSG00000069431	overlapping down	-2.09978	2.40374e-05	0.000781002	down	-4.83485	3.80303e-10	4.17819e-09	down
SEPTIN6	ENSG00000125354	overlapping down	-0.425053	2.41205e-05	0.000781877	down	-0.619837	7.36324e-16	1.59633e-14	down
MVB12B	ENSG00000196814	overlapping down	-0.703023	2.45618e-05	0.000791021	down	-0.762171	0.000455216	0.00168934	down
RNF144A	ENSG00000151692	overlapping down	-1.26842	2.55859e-05	0.000810921	down	-1.21601	1.77522e-05	8.88074e-05	down
PLEKHA5	ENSG00000052126	overlapping down	-0.737882	2.60111e-05	0.000821714	down	-0.643618	0.000358736	0.00136414	down
PAQR8	ENSG00000170915	overlapping down	-0.943317	2.61592e-05	0.000824335	down	-1.38922	2.03358e-13	3.41615e-12	down
HLA-DOA	ENSG00000204252	overlapping down	-2.17652	2.67082e-05	0.000836664	down	-2.53782	0.00277188	0.00851237	down
RHOBTB2	ENSG00000008853	overlapping down	-1.11764	2.78063e-05	0.000857776	down	-0.931567	8.23653e-09	7.40096e-08	down
ST8SIA5	ENSG00000101638	overlapping down	-1.51196	2.88165e-05	0.000881511	down	-2.03031	1.53136e-05	7.7582e-05	down
AC016705.2	ENSG00000259495	overlapping down	-0.998099	2.99387e-05	0.000909506	down	-1.15825	0.00143659	0.00471333	down
LINC01963	ENSG00000260804	overlapping down	-0.721297	3.08789e-05	0.000935483	down	-0.899483	0.00520787	0.0149233	down
DACH1	ENSG00000276644	overlapping down	-1.50443	3.30143e-05	0.000982556	down	-1.94833	1.54255e-08	1.32895e-07	down
RTN1	ENSG00000139970	overlapping down	-1.26779	3.44487e-05	0.00101561	down	-1.94554	4.713e-15	9.37098e-14	down
SEPTIN3	ENSG00000100167	overlapping down	-1.22808	3.49473e-05	0.00102618	down	-2.75745	8.50108e-16	1.82066e-14	down
CDH3	ENSG00000062038	overlapping down	-2.18805	3.83591e-05	0.00111297	down	-3.1508	7.07222e-16	1.53797e-14	down
GNG2	ENSG00000186469	overlapping down	-0.937811	3.93577e-05	0.00113445	down	-0.453567	0.0134254	0.0343583	down
[truncated: 8,761 more rows]

## Sheet: S5. ALS protective overlap
			ALS vs CTRL			Spinal cord injury vs uninjured			Middle cerebral artery occlusion vs Sham				Table S5. Differential gene expression in ALS meta-analysis and protective mouse astrocytes
[truncated: 506 more rows]

[truncated: 5 more sheets: S6. TDP43 Mem SOD1 overlap, S7. mouse and human ALS overlap, S8. mouse ALS A1 overlap, S9. mouse ALS protective overla, S10. Sod1 TRAP overlap]
